# Supplementary material for: Aging Human Hematopoietic Stem Cells Manifest Profound Epigenetic Reprogramming of Enhancers That May Predispose to Leukemia
Source: Oxford University Press journal article supplement (doi:10.1158/2159-8290.cd-18-1474), 2019-05-13
Supplement: 21598290cd181474-sup-213895_2_supp_5514129_pr6m63.xlsx [file 21598290cd181474-sup-213895_2_supp_5514129_pr6m63.xlsx]

## Sheet: Description
Reported are the differentially expressed (padj<0.05, fold-change >1.5) genes in aged HSCe compared to young HSCe. A positive log2 fold-change corresponds to increased gene expression in aged HSCe.
Also shown are all results (L2FC, Wald-stat, p-adjusted etc) for all genes assayed by DESeq2 for young and aged HSCe "All Results HSCe" and sgKLF6 and sgNTC "All Results KLF6". The Wald stat was used as input for GSEA.

## Sheet: Differentially Expressed Genes
ID	GeneSym	baseMean	log2FoldChange	lfcSE	stat	pvalue	padj
ENSG00000184588.13	PDE4B	3022.9	-2.80879	0.305056	-9.20745	3.3397e-20	3.92582e-16
ENSG00000198692.5	EIF1AY	121.676	-3.62982	0.410546	-8.84144	9.44909e-19	5.5537e-15
ENSG00000160789.15	LMNA	4509.06	-2.98888	0.356129	-8.39267	4.75215e-17	1.86205e-13
ENSG00000123146.15	CD97	2246.82	-1.4023	0.17594	-7.97036	1.58212e-15	3.77689e-12
ENSG00000179820.11	MYADM	3449.7	-1.7746	0.222702	-7.96847	1.6065e-15	3.77689e-12
ENSG00000075426.7	FOSL2	10536.8	-2.19742	0.28574	-7.69028	1.4681e-14	2.87625e-11
ENSG00000111605.12	CPSF6	5091.53	-0.720923	0.0996237	-7.23646	4.60559e-13	7.7341e-10
ENSG00000203819.6	HIST2H2BC	563.217	2.01983	0.2978	6.78249	1.18123e-11	1.73567e-08
ENSG00000113361.8	CDH6	135.581	2.84225	0.430508	6.60208	4.05416e-11	4.83953e-08
ENSG00000106346.7	USP42	1400.93	-1.28705	0.195013	-6.5998	4.117e-11	4.83953e-08
ENSG00000196787.2	HIST1H2AG	3145.45	1.46047	0.230114	6.34671	2.19962e-10	2.35059e-07
ENSG00000129824.11	RPS4Y1	4064.72	-1.95913	0.310742	-6.30467	2.88804e-10	2.82908e-07
ENSG00000178127.8	NDUFV2	498.338	-1.93812	0.314942	-6.15388	7.56091e-10	6.83681e-07
ENSG00000138670.12	RASGEF1B	2287.05	-1.67456	0.272925	-6.1356	8.48371e-10	7.12328e-07
ENSG00000152213.3	ARL11	780.36	1.60429	0.262373	6.11454	9.68354e-10	7.14628e-07
ENSG00000121931.11	LRIF1	701.789	1.60547	0.263013	6.10415	1.03349e-09	7.14628e-07
ENSG00000127922.5	SHFM1	439.448	-2.02023	0.330786	-6.10738	1.01281e-09	7.14628e-07
ENSG00000113916.13	BCL6	554.817	-2.4589	0.404858	-6.07348	1.25164e-09	8.17391e-07
ENSG00000160888.6	IER2	5630.09	1.37229	0.227852	6.0227	1.71526e-09	1.06121e-06
ENSG00000196890.3	HIST3H2BB	198.139	1.94836	0.325508	5.98561	2.15576e-09	1.26705e-06
ENSG00000266965.1	RP11-712P20.2	190.264	-1.95073	0.329477	-5.9207	3.20583e-09	1.7945e-06
ENSG00000069399.8	BCL3	1087.02	-2.26406	0.385431	-5.87409	4.25179e-09	2.27181e-06
ENSG00000162413.12	KLHL21	1384.84	1.27486	0.217718	5.85556	4.75411e-09	2.42977e-06
ENSG00000130164.7	LDLR	3097.21	-2.16618	0.370882	-5.84061	5.20099e-09	2.5474e-06
ENSG00000100221.6	JOSD1	2995.1	-1.30857	0.224416	-5.83099	5.5098e-09	2.59071e-06
ENSG00000067082.10	KLF6	9803.08	-1.3539	0.233045	-5.80963	6.26113e-09	2.83075e-06
ENSG00000104824.12	HNRNPL	6042.25	-0.877181	0.151821	-5.77775	7.57071e-09	3.29606e-06
ENSG00000011454.12	RABGAP1	5852.04	1.08414	0.189039	5.73503	9.74926e-09	4.04033e-06
ENSG00000026025.9	VIM	39058.1	-1.08341	0.189035	-5.73128	9.96763e-09	4.04033e-06
ENSG00000081320.6	STK17B	8129.62	-1.4564	0.256859	-5.67005	1.42756e-08	5.59366e-06
ENSG00000132640.10	BTBD3	1199.68	-1.14242	0.202489	-5.64191	1.68178e-08	6.17791e-06
ENSG00000155090.10	KLF10	7777.34	-1.63255	0.289251	-5.64407	1.6608e-08	6.17791e-06
ENSG00000169635.5	HIC2	952.234	-1.30983	0.233381	-5.61243	1.99507e-08	7.10667e-06
ENSG00000124942.9	AHNAK	32564.6	-0.924657	0.165107	-5.60035	2.13916e-08	7.18453e-06
ENSG00000187257.10	RSBN1L	2411.95	1.05795	0.18881	5.60326	2.10353e-08	7.18453e-06
ENSG00000058600.11	POLR3E	2748.5	-0.745777	0.133405	-5.59031	2.26666e-08	7.40127e-06
ENSG00000105321.8	CCDC9	1040.61	-1.36999	0.245667	-5.57663	2.45221e-08	7.72608e-06
ENSG00000172578.7	KLHL6	5073.21	0.843821	0.151644	5.5645	2.62904e-08	7.72608e-06
ENSG00000167333.8	TRIM68	717.758	1.0998	0.197617	5.56533	2.61656e-08	7.72608e-06
ENSG00000067646.7	ZFY	638.995	-1.89149	0.339813	-5.56626	2.60265e-08	7.72608e-06
ENSG00000130304.12	SLC27A1	656.471	0.837919	0.151494	5.53105	3.1832e-08	9.12646e-06
ENSG00000138756.13	BMP2K	2527.88	1.13329	0.205133	5.52464	3.30161e-08	9.24057e-06
ENSG00000099381.12	SETD1A	5015.68	-0.888392	0.162791	-5.45725	4.83563e-08	1.32193e-05
ENSG00000173276.9	ZBTB21	2502.29	-1.62081	0.298074	-5.43761	5.39988e-08	1.44263e-05
ENSG00000136490.4	LIMD2	2874.68	-0.993404	0.183609	-5.41042	6.28774e-08	1.6425e-05
ENSG00000105127.4	AKAP8	2117.79	-0.833661	0.154626	-5.39148	6.98799e-08	1.78573e-05
ENSG00000160201.7	U2AF1	5708.69	-1.07554	0.199936	-5.37944	7.47176e-08	1.85652e-05
ENSG00000196693.10	ZNF33B	2235.13	0.880483	0.163755	5.37683	7.58084e-08	1.85652e-05
ENSG00000178096.8	BOLA1	695.669	2.05128	0.383684	5.34628	8.97779e-08	2.11068e-05
ENSG00000067048.12	DDX3Y	2450.74	-1.71952	0.321604	-5.34671	8.95689e-08	2.11068e-05
ENSG00000108296.7	CWC25	1955.6	-1.3062	0.244705	-5.33784	9.4063e-08	2.13447e-05
ENSG00000164975.11	SNAPC3	719.252	1.33877	0.250841	5.33715	9.44214e-08	2.13447e-05
ENSG00000168264.6	IRF2BP2	15740	-0.777498	0.146081	-5.32237	1.02425e-07	2.27171e-05
ENSG00000066117.10	SMARCD1	2504.3	-0.802241	0.150916	-5.31581	1.06184e-07	2.31147e-05
ENSG00000134531.5	EMP1	1315.88	-1.49834	0.283134	-5.292	1.20988e-07	2.58585e-05
ENSG00000070961.10	ATP2B1	2855.28	-1.37581	0.2616	-5.25921	1.44677e-07	2.83447e-05
ENSG00000114573.5	ATP6V1A	1913.65	0.828101	0.157142	5.26977	1.36594e-07	2.83447e-05
ENSG00000091140.8	DLD	1932.14	-1.06092	0.201384	-5.26816	1.37796e-07	2.83447e-05
ENSG00000116793.11	PHTF1	2859.94	-1.43975	0.273682	-5.26066	1.43535e-07	2.83447e-05
ENSG00000233864.3	TTTY15	343.812	-1.93856	0.368543	-5.26008	1.43995e-07	2.83447e-05
ENSG00000232220.2	AC008440.5	280.084	-1.98831	0.379313	-5.24186	1.58962e-07	3.01387e-05
ENSG00000184825.4	HIST1H2AH	3078.52	1.58392	0.302154	5.24207	1.58781e-07	3.01387e-05
ENSG00000156675.11	RAB11FIP1	1596.09	-1.09538	0.209727	-5.22289	1.76147e-07	3.28669e-05
ENSG00000129460.11	NGDN	902.213	-1.0299	0.197895	-5.20426	1.9477e-07	3.57738e-05
ENSG00000213064.5	SFT2D2	3194.6	-0.864456	0.166494	-5.19213	2.07902e-07	3.75984e-05
ENSG00000119917.9	IFIT3	535.285	1.5998	0.30852	5.18539	2.15568e-07	3.8394e-05
ENSG00000060138.8	YBX3	14122.2	-0.673882	0.130725	-5.15496	2.53683e-07	4.4508e-05
ENSG00000137259.2	HIST1H2AB	1172.14	1.74094	0.338997	5.13558	2.81278e-07	4.86239e-05
ENSG00000163349.17	HIPK1	8633.9	-0.918478	0.179207	-5.12523	2.97176e-07	4.95443e-05
ENSG00000099725.10	PRKY	285.616	-1.70786	0.333311	-5.12392	2.99247e-07	4.95443e-05
ENSG00000131002.7	TXLNG2P	757.647	-1.74076	0.339442	-5.1283	2.92367e-07	4.95443e-05
ENSG00000197362.9	ZNF786	576.696	1.54676	0.302386	5.11517	3.13453e-07	5.11755e-05
ENSG00000131023.8	LATS1	3387.55	0.790443	0.15483	5.10522	3.30402e-07	5.32037e-05
ENSG00000134323.10	MYCN	5761.8	1.51997	0.298259	5.09614	3.46646e-07	5.50652e-05
ENSG00000113387.7	SUB1	3589.32	-1.10301	0.216593	-5.09253	3.53323e-07	5.53775e-05
ENSG00000006634.3	DBF4	492.739	-1.50522	0.296043	-5.08446	3.68669e-07	5.70224e-05
ENSG00000181826.5	RELL1	1134.05	-1.65782	0.326711	-5.07426	3.89e-07	5.93857e-05
ENSG00000142065.9	ZFP14	747.845	1.20195	0.23715	5.06832	4.01353e-07	6.04859e-05
ENSG00000116679.11	IVNS1ABP	2803.71	-0.672841	0.13297	-5.06008	4.19078e-07	6.23578e-05
ENSG00000117748.5	RPA2	1362.9	1.5421	0.305231	5.05224	4.36666e-07	6.41626e-05
ENSG00000114374.8	USP9Y	855.946	-1.62396	0.32172	-5.04775	4.47043e-07	6.48764e-05
ENSG00000139636.11	LMBR1L	1633.82	-1.17629	0.233207	-5.04396	4.56006e-07	6.53701e-05
ENSG00000145675.10	PIK3R1	8468.16	-1.19763	0.238341	-5.02485	5.03825e-07	7.06166e-05
ENSG00000131759.13	RARA	1605.19	-1.53434	0.30537	-5.02455	5.04619e-07	7.06166e-05
ENSG00000176853.11	FAM91A1	2144.09	-1.25682	0.25151	-4.9971	5.81998e-07	8.0483e-05
ENSG00000173120.10	KDM2A	9606.47	-0.616402	0.123408	-4.99485	5.88816e-07	8.0483e-05
ENSG00000183878.11	UTY	872.838	-1.63703	0.327901	-4.99245	5.96175e-07	8.05522e-05
ENSG00000137575.7	SDCBP	1875.11	-0.916328	0.183856	-4.98394	6.23039e-07	8.32253e-05
ENSG00000139722.2	VPS37B	4728.82	-0.788443	0.158327	-4.97985	6.36339e-07	8.40468e-05
ENSG00000168066.16	SF1	20393.3	-0.716839	0.144089	-4.97499	6.52524e-07	8.52269e-05
ENSG00000163947.7	ARHGEF3	2372.34	0.657199	0.132205	4.97105	6.65922e-07	8.60211e-05
ENSG00000184557.3	SOCS3	3450.23	-1.90718	0.38389	-4.96803	6.76355e-07	8.64191e-05
ENSG00000164938.9	TP53INP1	1492.35	-1.3629	0.274859	-4.95854	7.10234e-07	8.97721e-05
ENSG00000196227.6	FAM217B	894.286	1.07634	0.217206	4.95536	7.21978e-07	9.02857e-05
ENSG00000170144.14	HNRNPA3	5170.74	-0.601928	0.121553	-4.95199	7.34585e-07	9.08953e-05
ENSG00000180354.11	C7orf41	8127.73	-0.68547	0.138486	-4.94976	7.43052e-07	9.09852e-05
ENSG00000254838.4	GVINP1	1601.19	1.1983	0.242295	4.94563	7.58965e-07	9.19756e-05
ENSG00000196331.5	HIST1H2BO	2902.63	1.34886	0.273609	4.92988	8.228e-07	9.76971e-05
ENSG00000177683.9	THAP5	950.399	1.19932	0.243642	4.92245	8.54665e-07	0.000100466
ENSG00000092820.13	EZR	3214.98	-1.33637	0.27218	-4.90988	9.11312e-07	0.000104964
ENSG00000060749.10	QSER1	2854.41	0.698368	0.142207	4.91092	9.06501e-07	0.000104964
ENSG00000100220.7	RTCB	1608.88	-0.718006	0.146291	-4.90808	9.19716e-07	0.000104964
ENSG00000165152.4	TMEM246	2062.53	1.41225	0.288536	4.89455	9.85331e-07	0.000111371
ENSG00000119048.3	UBE2B	896.23	-1.32454	0.270895	-4.8895	1.01093e-06	0.000113177
ENSG00000093144.14	ECHDC1	591.91	1.33256	0.273706	4.86857	1.12409e-06	0.000124657
ENSG00000147526.15	TACC1	6993.29	-0.690856	0.141995	-4.86537	1.14246e-06	0.00012551
ENSG00000100068.7	LRP5L	1066.43	-1.19357	0.245435	-4.86308	1.1557e-06	0.00012579
ENSG00000119801.8	YPEL5	5508.93	-1.02006	0.210164	-4.85362	1.2123e-06	0.000130739
ENSG00000179094.9	PER1	12347.1	-1.41514	0.292189	-4.84322	1.27749e-06	0.00013617
ENSG00000105497.3	ZNF175	624.249	1.18818	0.245394	4.84193	1.28582e-06	0.00013617
ENSG00000080823.17	MOK	294.013	-1.86423	0.385777	-4.83242	1.34887e-06	0.000141571
ENSG00000143457.6	GOLPH3L	1076.51	1.28836	0.267235	4.82106	1.42797e-06	0.000147665
ENSG00000143751.9	SDE2	1805.08	-1.02265	0.212147	-4.82049	1.43205e-06	0.000147665
ENSG00000186951.12	PPARA	1010.45	1.03916	0.215932	4.81244	1.49095e-06	0.000152401
ENSG00000115875.14	SRSF7	5946.87	0.771359	0.160845	4.79567	1.62131e-06	0.000164298
ENSG00000225828.1	FAM229A	468.381	-1.77393	0.370609	-4.78653	1.69691e-06	0.000170489
ENSG00000105968.14	H2AFV	5696.47	-0.912849	0.19101	-4.77905	1.76125e-06	0.000175453
ENSG00000113369.4	ARRDC3	8032.6	-1.05473	0.220911	-4.77444	1.80207e-06	0.00017678
ENSG00000179335.14	CLK3	3268.89	-0.67034	0.14041	-4.77415	1.80465e-06	0.00017678
ENSG00000007080.6	CCDC124	472.925	-0.999601	0.209574	-4.76968	1.84516e-06	0.000179255
ENSG00000215271.6	HOMEZ	1223.8	1.2598	0.264431	4.7642	1.89607e-06	0.000182691
ENSG00000169242.7	EFNA1	285.034	1.75106	0.369609	4.73759	2.16273e-06	0.00020669
ENSG00000204682.5	CASC10	407.584	1.52193	0.321453	4.73453	2.19565e-06	0.000208144
ENSG00000104903.4	LYL1	3423.94	0.691461	0.146181	4.73017	2.24331e-06	0.000210961
ENSG00000104783.7	KCNN4	1077.97	1.34316	0.284189	4.72629	2.2866e-06	0.000213325
ENSG00000177000.6	MTHFR	2554.16	0.750202	0.159057	4.71655	2.39873e-06	0.00022029
ENSG00000187742.10	SECISBP2	4205.09	-1.0412	0.220718	-4.71733	2.38957e-06	0.00022029
ENSG00000148296.5	SURF6	1373.52	1.19975	0.254834	4.70796	2.50203e-06	0.000227995
ENSG00000175203.11	DCTN2	2201.64	-0.841635	0.179061	-4.70026	2.59826e-06	0.000234269
ENSG00000174197.12	MGA	8834.97	0.769924	0.163839	4.69928	2.61074e-06	0.000234269
ENSG00000169554.12	ZEB2	8353.21	0.630275	0.13451	4.68573	2.78966e-06	0.000248427
ENSG00000101544.4	ADNP2	2746.78	-1.36482	0.291621	-4.68012	2.8671e-06	0.000253404
ENSG00000162664.12	ZNF326	2976.09	-1.20312	0.257485	-4.67261	2.97399e-06	0.00026089
ENSG00000160226.11	C21orf2	618.001	-1.2202	0.261446	-4.66712	3.05451e-06	0.000264013
ENSG00000116005.7	PCYOX1	1153.98	1.257	0.269285	4.66792	3.04266e-06	0.000264013
ENSG00000147439.7	BIN3	1064.02	-1.27136	0.273393	-4.65031	3.31437e-06	0.000280889
ENSG00000258820.1	RP11-293M10.2	477.786	1.19653	0.257325	4.64987	3.32144e-06	0.000280889
ENSG00000148719.10	DNAJB12	2253.18	-0.94433	0.203198	-4.64734	3.36244e-06	0.000282325
ENSG00000170871.7	KIAA0232	1895.91	-1.00058	0.215991	-4.63251	3.61251e-06	0.00030117
ENSG00000162889.6	MAPKAPK2	3446.12	-1.17076	0.253291	-4.62219	3.79714e-06	0.000314334
ENSG00000204569.5	PPP1R10	4890.52	0.82775	0.179168	4.61998	3.83777e-06	0.000315475
ENSG00000151414.10	NEK7	1572.97	1.04586	0.226615	4.61514	3.92828e-06	0.000320673
ENSG00000185950.7	IRS2	2385.01	-1.10086	0.238923	-4.60759	4.07361e-06	0.000330243
ENSG00000182611.3	HIST1H2AJ	2914.33	1.27696	0.277357	4.60403	4.14386e-06	0.000333637
ENSG00000106560.6	GIMAP2	974.631	0.953372	0.207181	4.60165	4.19159e-06	0.000335185
ENSG00000061918.8	GUCY1B3	3755.09	1.25314	0.272796	4.59368	4.35498e-06	0.000345897
ENSG00000072274.8	TFRC	3007.04	-0.85898	0.187271	-4.58683	4.50031e-06	0.000355041
ENSG00000211899.3	IGHM	4139.18	-1.18321	0.258449	-4.57813	4.6916e-06	0.000367241
ENSG00000165702.8	GFI1B	1241.34	1.53283	0.33517	4.57328	4.80142e-06	0.000368893
ENSG00000064419.9	TNPO3	1597.56	0.651073	0.142429	4.57121	4.84919e-06	0.000370145
ENSG00000198355.4	PIM3	1648.18	-1.46528	0.320931	-4.56573	4.9776e-06	0.000377495
ENSG00000090432.5	MUL1	776.485	-1.16593	0.255693	-4.55989	5.11812e-06	0.000384292
ENSG00000255717.2	SNHG1	2130.73	0.889306	0.195053	4.55929	5.13261e-06	0.000384292
ENSG00000049323.11	LTBP1	668.305	1.72368	0.379937	4.53675	5.7127e-06	0.000425018
ENSG00000160058.14	BSDC1	2843.6	-1.20887	0.266768	-4.53153	5.85593e-06	0.000432206
ENSG00000119508.13	NR4A3	996.937	-1.7104	0.377526	-4.53056	5.88286e-06	0.000432206
ENSG00000203813.4	HIST1H3H	1056.91	1.17383	0.259312	4.52671	5.99078e-06	0.000437401
ENSG00000147124.8	ZNF41	602.602	1.21266	0.267981	4.52518	6.0345e-06	0.000437874
ENSG00000132323.4	ILKAP	1127.23	-1.13162	0.250148	-4.52378	6.07439e-06	0.000438064
ENSG00000233895.1	RP1-122P22.2	185.074	1.35177	0.299125	4.51907	6.21107e-06	0.00044519
ENSG00000172530.15	BANP	1112.36	0.994187	0.220133	4.5163	6.29297e-06	0.000445626
ENSG00000109787.8	KLF3	3133.45	-1.06426	0.235611	-4.51704	6.27099e-06	0.000445626
ENSG00000179950.9	PUF60	2448.9	-0.72549	0.160795	-4.51189	6.42527e-06	0.000449578
ENSG00000055483.15	USP36	5215.36	-0.99198	0.219806	-4.51298	6.3924e-06	0.000449578
ENSG00000172349.12	IL16	4936.32	1.28359	0.284799	4.50701	6.5747e-06	0.000454621
ENSG00000229320.3	KRT8P12	324.669	1.34707	0.298807	4.50815	6.53964e-06	0.000454621
ENSG00000133561.11	GIMAP6	1165.11	1.50035	0.333857	4.49399	6.99015e-06	0.000480522
ENSG00000213281.4	NRAS	1753.84	-1.18204	0.263725	-4.48208	7.39203e-06	0.000505193
ENSG00000155926.9	SLA	2756.84	1.28653	0.288325	4.46207	8.11731e-06	0.000550503
ENSG00000163659.8	TIPARP	5836.64	-1.86937	0.419323	-4.45807	8.27015e-06	0.000555518
ENSG00000167635.7	ZNF146	2760.76	0.963246	0.216552	4.44811	8.66288e-06	0.000578592
ENSG00000169895.5	SYAP1	1531.86	-1.32671	0.299455	-4.4304	9.40574e-06	0.000624658
ENSG00000120705.8	ETF1	3461.51	-1.08802	0.245681	-4.4286	9.48485e-06	0.000626373
ENSG00000176597.7	B3GNT5	1325.09	-1.23129	0.278138	-4.42691	9.5592e-06	0.000626752
ENSG00000250802.2	ZBED3-AS1	185.576	1.43326	0.323823	4.42605	9.59722e-06	0.000626752
ENSG00000106028.6	SSBP1	1220.69	-0.973393	0.220072	-4.42306	9.73123e-06	0.000629411
ENSG00000130775.11	THEMIS2	2819.08	-1.24078	0.280544	-4.42275	9.74502e-06	0.000629411
ENSG00000105993.10	DNAJB6	6476.28	-0.971666	0.22012	-4.41426	1.01357e-05	0.000647739
ENSG00000198833.6	UBE2J1	2743.09	-0.762144	0.172658	-4.41419	1.0139e-05	0.000647739
ENSG00000078177.9	N4BP2	2813.05	-0.943224	0.214345	-4.40049	1.08006e-05	0.000684435
ENSG00000099246.12	RAB18	933.211	-1.1208	0.254733	-4.3999	1.08299e-05	0.000684435
ENSG00000127334.10	DYRK2	1145.2	-0.855323	0.194466	-4.39832	1.09093e-05	0.000685767
ENSG00000231721.2	MKLN1-AS1	1800.49	-0.921037	0.209848	-4.38906	1.13841e-05	0.000711808
ENSG00000162924.9	REL	2233.07	-1.10662	0.252348	-4.38531	1.15823e-05	0.00071658
ENSG00000022840.11	RNF10	6108.86	-0.998924	0.227733	-4.38639	1.15247e-05	0.00071658
ENSG00000165030.3	NFIL3	1766.28	-1.53392	0.350086	-4.38157	1.1783e-05	0.000725177
ENSG00000120738.7	EGR1	6023.27	1.56236	0.357552	4.36959	1.24479e-05	0.00076211
ENSG00000188177.9	ZC3H6	1597.94	1.21282	0.278769	4.35064	1.35741e-05	0.000822493
ENSG00000125746.10	EML2	641.548	1.15422	0.265416	4.3487	1.36946e-05	0.000825541
ENSG00000118513.14	MYB	16478.4	0.761097	0.175231	4.3434	1.40293e-05	0.000841398
ENSG00000132434.5	LANCL2	896.318	-0.998934	0.230139	-4.34057	1.42113e-05	0.000847991
ENSG00000154188.5	ANGPT1	5387.64	1.01977	0.235115	4.3373	1.44246e-05	0.000852063
ENSG00000239521.3	GATS	489.039	-1.35951	0.313377	-4.33827	1.43611e-05	0.000852063
ENSG00000106635.3	BCL7B	2463.37	-1.06158	0.24513	-4.33066	1.48662e-05	0.000865108
ENSG00000150787.3	PTS	401.281	-1.35914	0.313688	-4.33276	1.47249e-05	0.000865108
ENSG00000162971.6	TYW5	626.665	-1.3073	0.301822	-4.33135	1.48196e-05	0.000865108
ENSG00000118412.8	CASP8AP2	1300.7	0.738588	0.170898	4.3218	1.54765e-05	0.000891795
ENSG00000204842.10	ATXN2	2828.31	0.627917	0.145472	4.31641	1.58586e-05	0.000909354
ENSG00000128534.3	NAA38	516.104	-1.24001	0.287698	-4.31009	1.63188e-05	0.000917835
ENSG00000163444.7	TMEM183A	1113.58	-1.01017	0.234266	-4.31208	1.61725e-05	0.000917835
ENSG00000065548.13	ZC3H15	3582.54	-0.926168	0.21484	-4.31096	1.62548e-05	0.000917835
ENSG00000179134.10	SAMD4B	2954.68	-0.8588	0.199404	-4.30684	1.65602e-05	0.000926976
ENSG00000166046.6	TCP11L2	1377.8	-0.917651	0.213251	-4.30315	1.68386e-05	0.000938096
ENSG00000196544.6	C17orf59	387.7	1.38882	0.322993	4.29984	1.70924e-05	0.000941856
ENSG00000130940.10	CASZ1	564.243	-1.46967	0.341934	-4.2981	1.72266e-05	0.000941856
ENSG00000141141.10	DDX52	1549.65	-0.860627	0.200225	-4.2983	1.72117e-05	0.000941856
ENSG00000144681.6	STAC	482.436	1.06863	0.248475	4.30076	1.70214e-05	0.000941856
ENSG00000142178.7	SIK1	3954.99	-1.59019	0.370419	-4.29297	1.76302e-05	0.000959456
ENSG00000213762.6	ZNF134	1861.9	-0.829311	0.193276	-4.29082	1.78014e-05	0.000964313
ENSG00000204611.2	ZNF616	555.053	1.59367	0.371506	4.28975	1.78873e-05	0.000964519
ENSG00000095303.10	PTGS1	9376.93	1.01851	0.237592	4.2868	1.81266e-05	0.000972958
ENSG00000197045.8	GMFB	641.693	-1.0523	0.24599	-4.2778	1.88753e-05	0.00100792
ENSG00000177599.8	ZNF491	221.429	1.31534	0.307544	4.27692	1.89494e-05	0.00100792
ENSG00000138669.5	PRKG2	7614.19	1.03457	0.242026	4.27464	1.91449e-05	0.00101269
ENSG00000168421.8	RHOH	1638.53	-0.825927	0.193251	-4.27386	1.92115e-05	0.00101269
ENSG00000144655.10	CSRNP1	8010	-1.53399	0.359163	-4.271	1.94595e-05	0.00102119
ENSG00000101367.8	MAPRE1	3710.13	-0.790343	0.185724	-4.25546	2.08616e-05	0.00108508
ENSG00000122862.4	SRGN	3461.61	-1.03636	0.243521	-4.25571	2.08384e-05	0.00108508
ENSG00000146278.10	PNRC1	20085.4	-0.780422	0.183511	-4.25272	2.11186e-05	0.00109361
ENSG00000150316.7	CWC15	1090.87	-0.961673	0.22679	-4.24037	2.23152e-05	0.0011505
ENSG00000196374.5	HIST1H2BM	487.172	1.56774	0.370314	4.23355	2.30036e-05	0.00118082
ENSG00000136732.10	GYPC	3059.58	-1.02281	0.241799	-4.22998	2.33716e-05	0.00119449
ENSG00000101695.4	RNF125	1319.83	-1.16735	0.276117	-4.22772	2.36066e-05	0.00120128
ENSG00000029363.11	BCLAF1	11227.3	-0.830911	0.196681	-4.22466	2.39298e-05	0.00120727
ENSG00000215251.3	FASTKD5	1078.47	-1.17553	0.278247	-4.22478	2.39176e-05	0.00120727
ENSG00000164442.8	CITED2	4582.55	1.28714	0.304898	4.22154	2.42641e-05	0.00121778
ENSG00000131408.9	NR1H2	3918.25	-0.914839	0.216746	-4.22079	2.43452e-05	0.00121778
ENSG00000197903.6	HIST1H2BK	3854.22	0.856168	0.203257	4.21225	2.52844e-05	0.0012594
ENSG00000164056.6	SPRY1	1977.35	-0.850311	0.201979	-4.20989	2.55492e-05	0.00126722
ENSG00000124635.7	HIST1H2BJ	1641.81	1.31059	0.311428	4.20833	2.57268e-05	0.00127066
ENSG00000100644.12	HIF1A	4917.67	-1.15404	0.274518	-4.20387	2.62387e-05	0.00128547
ENSG00000132680.6	KIAA0907	1538.97	-0.707378	0.168308	-4.20288	2.63545e-05	0.00128547
ENSG00000146425.6	DYNLT1	659.332	-1.3506	0.321551	-4.20028	2.66581e-05	0.0012949
ENSG00000168564.5	CDKN2AIP	1583.09	1.09981	0.262038	4.19715	2.70295e-05	0.00130754
ENSG00000180626.9	ZNF594	871.405	1.34726	0.321499	4.19054	2.78286e-05	0.00134068
ENSG00000180667.6	YOD1	1171.81	-1.27938	0.305393	-4.1893	2.79817e-05	0.00134255
ENSG00000137628.12	DDX60	2065.84	1.11187	0.265657	4.18537	2.847e-05	0.00136043
ENSG00000107566.9	ERLIN1	2790.24	0.735853	0.175879	4.18386	2.86604e-05	0.00136398
ENSG00000128335.9	APOL2	1068.93	1.0857	0.259845	4.17827	2.9374e-05	0.00138855
ENSG00000135426.10	TESPA1	10034.7	0.829098	0.198446	4.17796	2.94129e-05	0.00138855
ENSG00000084463.3	WBP11	3437.29	-0.935637	0.224216	-4.17293	3.00704e-05	0.00141391
ENSG00000262202.3	SNORD3D	988.731	1.47091	0.352846	4.16869	3.06352e-05	0.00143473
ENSG00000167703.10	SLC43A2	642.42	-1.13879	0.27332	-4.1665	3.09317e-05	0.00144287
ENSG00000150457.7	LATS2	3852.79	-1.11734	0.268383	-4.16323	3.13779e-05	0.00145789
ENSG00000171206.9	TRIM8	4565.36	-0.795552	0.191208	-4.16066	3.17331e-05	0.00146859
ENSG00000158435.3	CNOT11	1252.99	-0.73853	0.177798	-4.15376	3.27053e-05	0.00150765
ENSG00000133794.13	ARNTL	374.981	-1.37522	0.33137	-4.15012	3.32299e-05	0.00152585
ENSG00000067369.9	TP53BP1	7260.75	-0.600047	0.144718	-4.14631	3.37872e-05	0.0015454
ENSG00000262155.1	RP11-266L9.5	195.451	1.34586	0.324709	4.14483	3.40071e-05	0.00154943
ENSG00000074660.11	SCARF1	2104.97	0.862164	0.208064	4.14375	3.41677e-05	0.00155074
ENSG00000173559.8	NABP1	843.429	0.897661	0.216977	4.13713	3.5168e-05	0.00158391
ENSG00000158710.10	TAGLN2	8740.4	-0.658435	0.159343	-4.1322	3.59306e-05	0.00161208
ENSG00000198746.8	GPATCH3	558.687	-0.900455	0.218176	-4.12719	3.67216e-05	0.0016413
ENSG00000166889.13	PATL1	2006.12	-0.776787	0.188375	-4.12362	3.72958e-05	0.00166065
ENSG00000136715.13	SAP130	1108.56	-0.744887	0.180806	-4.11982	3.79176e-05	0.00167564
ENSG00000205189.7	ZBTB10	3850.45	-0.912529	0.221862	-4.11305	3.90474e-05	0.00171911
ENSG00000125257.9	ABCC4	2368.68	0.946282	0.230229	4.11018	3.95344e-05	0.00172761
ENSG00000119927.9	GPAM	574.925	0.936119	0.227747	4.11034	3.95069e-05	0.00172761
ENSG00000070413.14	DGCR2	2093.11	0.861457	0.209759	4.10688	4.01037e-05	0.00173764
ENSG00000163565.14	IFI16	4841.17	0.804486	0.195916	4.10628	4.02074e-05	0.00173764
ENSG00000114125.9	RNF7	778.565	-1.12672	0.274278	-4.10796	3.99172e-05	0.00173764
ENSG00000071794.11	HLTF	1880.44	1.01973	0.248392	4.10532	4.03764e-05	0.00173855
ENSG00000224470.3	ATXN1L	2330.46	-1.06534	0.259621	-4.10345	4.07037e-05	0.0017399
ENSG00000058866.10	DGKG	441.688	1.29282	0.315031	4.10378	4.06447e-05	0.0017399
ENSG00000103035.6	PSMD7	2308.71	-0.792198	0.193111	-4.10229	4.09078e-05	0.00174229
ENSG00000127191.13	TRAF2	672.659	0.881771	0.215032	4.10064	4.12004e-05	0.00174841
ENSG00000116406.14	EDEM3	1837.95	0.747519	0.18274	4.09061	4.30245e-05	0.00179983
ENSG00000166225.4	FRS2	1182.15	-1.0577	0.258559	-4.09075	4.2998e-05	0.00179983
ENSG00000169826.6	CSGALNACT2	2220.52	-1.08712	0.266111	-4.08523	4.40338e-05	0.00182904
ENSG00000205937.7	RNPS1	5520.49	-0.622798	0.152426	-4.0859	4.39054e-05	0.00182904
ENSG00000106351.8	AGFG2	312.331	1.22199	0.299368	4.08188	4.46726e-05	0.00184904
ENSG00000213639.5	PPP1CB	7144.99	-0.816001	0.200044	-4.07912	4.52074e-05	0.00186461
ENSG00000024048.6	UBR2	3844.71	0.770042	0.188929	4.07584	4.58491e-05	0.00188446
ENSG00000085978.17	ATG16L1	1249.31	-0.72865	0.179143	-4.06743	4.75345e-05	0.00194693
ENSG00000070831.11	CDC42	3213.32	-0.820788	0.201911	-4.06509	4.80137e-05	0.00195972
ENSG00000144827.4	ABHD10	2037.32	0.96821	0.23826	4.06366	4.83084e-05	0.00196493
ENSG00000105483.12	CARD8	5078.72	0.958364	0.236066	4.05973	4.91292e-05	0.00197104
ENSG00000104859.10	CLASRP	2120.91	-0.765715	0.188542	-4.06125	4.88111e-05	0.00197104
ENSG00000051523.6	CYBA	1036.15	-0.695245	0.17123	-4.0603	4.90103e-05	0.00197104
ENSG00000196226.2	HIST1H2BB	2088.3	1.63333	0.402123	4.06177	4.8702e-05	0.00197104
ENSG00000187626.7	ZKSCAN4	306.687	1.35024	0.332688	4.05859	4.93708e-05	0.00197399
ENSG00000115325.9	DOK1	490.824	1.35148	0.333937	4.04712	5.18515e-05	0.00206615
ENSG00000137106.13	GRHPR	1214.45	-0.815574	0.201855	-4.04039	5.3363e-05	0.00211817
ENSG00000111335.8	OAS2	1438.03	0.955511	0.237765	4.01873	5.85136e-05	0.00230815
ENSG00000086065.9	CHMP5	1223.61	0.651021	0.162197	4.01377	5.97568e-05	0.00234147
ENSG00000135535.10	CD164	19479.9	0.887116	0.221399	4.00687	6.15298e-05	0.00240293
ENSG00000120696.8	KBTBD7	547.592	1.1902	0.297204	4.00464	6.21108e-05	0.00241759
ENSG00000078061.8	ARAF	1377.36	-0.880161	0.220042	-3.99997	6.33493e-05	0.00245766
ENSG00000198131.9	ZNF544	1818.24	0.735706	0.183968	3.99909	6.35871e-05	0.00245877
ENSG00000157954.10	WIPI2	2657.2	-0.613047	0.153385	-3.99678	6.42105e-05	0.00247473
ENSG00000168795.4	ZBTB5	1064.72	-1.05802	0.264907	-3.99391	6.49913e-05	0.00249664
ENSG00000173801.12	JUP	5703.65	-0.747968	0.187746	-3.98393	6.77857e-05	0.00259551
ENSG00000006114.11	SYNRG	2482.74	0.925538	0.232397	3.98257	6.81754e-05	0.00260195
ENSG00000197016.7	ZNF470	454.924	1.2237	0.307672	3.97729	6.97045e-05	0.00265171
ENSG00000082153.13	BZW1	2323.58	-0.770196	0.193761	-3.97498	7.03838e-05	0.00266891
ENSG00000164953.11	TMEM67	542.873	-1.00727	0.253452	-3.97421	7.06143e-05	0.00266904
ENSG00000151702.12	FLI1	7357.97	0.739684	0.186325	3.96985	7.19172e-05	0.00270957
ENSG00000174574.11	AKIRIN1	1004.89	-0.972795	0.24527	-3.96622	7.30202e-05	0.00274234
ENSG00000139318.7	DUSP6	4912.38	0.989339	0.249936	3.95837	7.54623e-05	0.00281606
ENSG00000214106.3	PAXIP1-AS2	575.42	1.26713	0.320068	3.95896	7.52783e-05	0.00281606
ENSG00000167625.6	ZNF526	861.834	1.05841	0.267504	3.9566	7.60249e-05	0.00282808
ENSG00000156860.11	FBRS	4996.8	-0.835521	0.211286	-3.95446	7.67084e-05	0.0028445
ENSG00000139433.5	GLTP	752.264	-1.15584	0.292832	-3.94712	7.90968e-05	0.00291468
ENSG00000068724.11	TTC7A	1561.27	-0.94061	0.239351	-3.92984	8.50027e-05	0.00312252
ENSG00000022267.12	FHL1	2614.68	-0.61855	0.157488	-3.92759	8.58007e-05	0.00313226
ENSG00000130147.11	SH3BP4	2737.54	-0.691282	0.175984	-3.9281	8.562e-05	0.00313226
ENSG00000156671.8	SAMD8	1204.35	-1.24623	0.317364	-3.9268	8.60819e-05	0.00313279
ENSG00000196470.7	SIAH1	781.34	-1.2358	0.315026	-3.92284	8.75099e-05	0.00317493
ENSG00000164815.6	ORC5	401.113	1.05988	0.270614	3.91657	8.98177e-05	0.00323867
ENSG00000198843.8	SELT	704.338	-0.784842	0.200632	-3.91185	9.15927e-05	0.00328254
ENSG00000083828.11	ZNF586	1104.39	-0.811037	0.207314	-3.91212	9.149e-05	0.00328254
ENSG00000110047.13	EHD1	1319.81	1.10487	0.283398	3.89866	9.67252e-05	0.0034472
ENSG00000106348.12	IMPDH1	1379.81	0.74522	0.19119	3.89781	9.7067e-05	0.0034472
ENSG00000059728.6	MXD1	1178.2	-0.911507	0.233836	-3.89807	9.69642e-05	0.0034472
ENSG00000198799.7	LRIG2	1580.1	0.889746	0.228401	3.89554	9.79817e-05	0.00345878
ENSG00000172315.5	TP53RK	502.805	1.14072	0.292813	3.89573	9.79031e-05	0.00345878
ENSG00000146833.11	TRIM4	2652.02	0.713288	0.183197	3.89355	9.87863e-05	0.00347674
ENSG00000146457.10	WTAP	3381.37	-0.820955	0.211126	-3.88846	0.000100883	0.00353993
ENSG00000185158.8	LRRC37B	1916.83	-0.610779	0.157154	-3.88651	0.000101697	0.00355788
ENSG00000130202.5	PVRL2	1252.94	-0.882625	0.227514	-3.87943	0.000104701	0.00363057
ENSG00000115520.4	COQ10B	708.941	-1.08968	0.281157	-3.87571	0.000106316	0.00365423
ENSG00000123405.9	NFE2	4707.44	1.22235	0.315356	3.8761	0.000106146	0.00365423
ENSG00000162517.8	PEF1	1590.6	-0.874575	0.225595	-3.87674	0.000105864	0.00365423
ENSG00000023902.9	PLEKHO1	2653.04	-1.10629	0.285667	-3.87265	0.000107657	0.00368953
ENSG00000213923.6	CSNK1E	3039.1	-0.859473	0.22202	-3.87114	0.000108327	0.00370168
ENSG00000175110.7	MRPS22	878.05	-0.912024	0.23567	-3.86992	0.000108869	0.00370945
ENSG00000119906.7	FAM178A	2569.31	0.815693	0.210823	3.86909	0.000109241	0.00371135
ENSG00000257621.3	RP11-349A22.5	2168.14	-0.810359	0.20958	-3.86658	0.000110373	0.00373791
ENSG00000217159.2	LARP1P1	167.98	1.65667	0.42961	3.85621	0.00011516	0.00386773
ENSG00000145715.10	RASA1	1913.37	0.903361	0.234258	3.85627	0.000115128	0.00386773
ENSG00000184203.3	PPP1R2	1394.24	-1.00483	0.260642	-3.8552	0.000115634	0.00387258
ENSG00000149564.7	ESAM	256.801	1.00644	0.261161	3.85371	0.000116344	0.00388528
ENSG00000132507.13	EIF5A	3657.57	-0.701603	0.182184	-3.85108	0.000117598	0.00391604
ENSG00000136146.10	MED4	1167.1	-0.668505	0.173678	-3.84911	0.000118547	0.00393649
ENSG00000197312.7	DDI2	1170.44	0.970644	0.252751	3.84032	0.000122874	0.00406868
ENSG00000010404.13	IDS	6665.7	-0.713451	0.186178	-3.83208	0.000127062	0.00415232
ENSG00000198862.9	LTN1	1549.54	0.590311	0.154061	3.83167	0.000127276	0.00415232
ENSG00000101782.10	RIOK3	1654.86	-1.09599	0.28592	-3.83319	0.000126493	0.00415232
ENSG00000100678.14	SLC8A3	3479.66	0.784844	0.20486	3.83112	0.000127559	0.00415232
ENSG00000135269.13	TES	1615.21	-0.857167	0.22359	-3.83365	0.000126256	0.00415232
ENSG00000167562.7	ZNF701	677.071	0.93552	0.244228	3.83052	0.000127872	0.00415232
ENSG00000136436.10	CALCOCO2	3505.07	-0.606289	0.158465	-3.826	0.000130241	0.00416731
ENSG00000067334.9	DNTTIP2	3072.53	-0.881368	0.230428	-3.82492	0.000130816	0.00416731
ENSG00000115548.12	KDM3A	5874.41	-0.842757	0.220186	-3.82748	0.000129464	0.00416731
ENSG00000197111.11	PCBP2	4900.28	-0.586829	0.153365	-3.82634	0.00013006	0.00416731
ENSG00000133226.12	SRRM1	7139.62	-0.601407	0.157193	-3.82592	0.000130285	0.00416731
ENSG00000136478.3	TEX2	2753.91	0.640152	0.167352	3.82519	0.000130674	0.00416731
ENSG00000185728.12	YTHDF3	2495.12	-0.865431	0.226141	-3.82696	0.000129735	0.00416731
ENSG00000100426.6	ZBED4	3623.65	-0.681408	0.178205	-3.82374	0.000131442	0.00417596
ENSG00000106803.5	SEC61B	388.374	-1.2059	0.315653	-3.82033	0.000133272	0.00422267
ENSG00000163738.14	MTHFD2L	735.576	-0.98594	0.258191	-3.81865	0.000134183	0.0042401
ENSG00000135916.11	ITM2C	7658.06	-0.80049	0.209701	-3.8173	0.000134921	0.00425187
ENSG00000114978.13	MOB1A	4170.37	-0.668494	0.175152	-3.81664	0.000135279	0.00425187
ENSG00000125534.5	PPDPF	492.63	-1.00795	0.264253	-3.81433	0.000136554	0.0042805
ENSG00000129493.10	HEATR5A	287.918	1.10614	0.29071	3.80495	0.000141831	0.00440975
ENSG00000205413.3	SAMD9	2676.11	0.678346	0.178273	3.80511	0.000141742	0.00440975
ENSG00000234444.5	ZNF736	1478.65	-0.902656	0.23716	-3.80611	0.000141169	0.00440975
ENSG00000131051.16	RBM39	16006	-0.684107	0.179914	-3.8024	0.000143299	0.00442856
ENSG00000172954.9	LCLAT1	533.132	0.967045	0.254409	3.80114	0.000144031	0.00443215
ENSG00000168175.10	MAPK1IP1L	2583.08	-0.950993	0.250349	-3.79867	0.000145473	0.00446483
ENSG00000185122.6	HSF1	2605.03	-0.715573	0.188418	-3.79779	0.00014599	0.00446903
ENSG00000164366.3	CCDC127	536.473	0.974288	0.256613	3.79673	0.00014662	0.00447666
ENSG00000197937.8	ZNF347	476.401	1.09297	0.2884	3.78978	0.000150784	0.00459187
ENSG00000108669.12	CYTH1	3936.43	-0.911271	0.240751	-3.78512	0.000153637	0.00466456
ENSG00000154133.10	ROBO4	4649.44	0.636235	0.168112	3.78459	0.000153964	0.00466456
ENSG00000115956.9	PLEK	3627.98	1.0764	0.284498	3.78349	0.000154642	0.00467304
ENSG00000047648.17	ARHGAP6	339.317	1.19722	0.316687	3.78044	0.000156549	0.00470647
ENSG00000177169.5	ULK1	2955.44	-0.844688	0.223412	-3.78085	0.000156294	0.00470647
ENSG00000060558.3	GNA15	5591.91	-0.973459	0.257732	-3.77702	0.000158716	0.00475945
ENSG00000183283.11	DAZAP2	5204.69	-0.823713	0.218128	-3.77628	0.000159189	0.00476149
ENSG00000137947.7	GTF2B	723.681	-0.85517	0.226511	-3.77541	0.000159745	0.00476599
ENSG00000123329.13	ARHGAP9	2845.43	-0.614031	0.162835	-3.77087	0.000162678	0.00484121
ENSG00000118263.10	KLF7	2219.85	-0.87645	0.232844	-3.76411	0.000167142	0.00496151
ENSG00000103510.15	KAT8	2333.13	-0.588095	0.156388	-3.76049	0.00016958	0.00500857
ENSG00000167632.10	TRAPPC9	3354.06	-0.633987	0.16857	-3.76098	0.000169248	0.00500857
ENSG00000126945.8	HNRNPH2	992.973	-0.912492	0.24278	-3.75851	0.000170927	0.00502381
ENSG00000062370.12	ZNF112	224.087	1.45174	0.386257	3.75848	0.00017095	0.00502381
ENSG00000023734.6	STRAP	2151.1	-0.803278	0.2138	-3.75715	0.000171861	0.00503798
ENSG00000153914.11	SREK1	4750.18	-0.781533	0.208095	-3.75565	0.000172893	0.00505561
ENSG00000167604.9	NFKBID	608.191	-1.01064	0.269156	-3.75484	0.000173454	0.00505944
ENSG00000162722.8	TRIM58	1916.92	0.697942	0.186219	3.74797	0.000178271	0.00517426
ENSG00000130150.7	MOSPD2	260.442	1.17252	0.313306	3.74243	0.000182251	0.00526378
ENSG00000160633.8	SAFB	2551.42	-0.611175	0.163373	-3.74098	0.000183303	0.00528119
ENSG00000197329.7	PELI1	1450.92	-1.28149	0.342754	-3.73882	0.000184889	0.0053009
ENSG00000146676.5	PURB	3089.53	-0.767147	0.205153	-3.73939	0.000184465	0.0053009
ENSG00000092203.9	TOX4	2447.88	-0.744584	0.19923	-3.73731	0.000185997	0.00531969
ENSG00000034152.14	MAP2K3	1286.15	-0.833952	0.223216	-3.73607	0.000186915	0.00532276
ENSG00000166402.4	TUB	320.276	1.44001	0.385447	3.73595	0.00018701	0.00532276
ENSG00000135457.5	TFCP2	2138.35	0.908433	0.243223	3.73498	0.00018773	0.00533035
ENSG00000116984.8	MTR	5470.05	0.693761	0.185841	3.73308	0.000189149	0.00535771
ENSG00000215447.3	BX322557.10	220.106	1.26136	0.338002	3.73181	0.00019011	0.00537198
ENSG00000141522.7	ARHGDIA	4722.72	-0.595217	0.159637	-3.72856	0.000192575	0.00540946
ENSG00000165732.8	DDX21	4325.22	-0.672719	0.180438	-3.72825	0.000192817	0.00540946
ENSG00000185262.7	UBALD2	1193.94	-1.02833	0.275799	-3.72856	0.000192575	0.00540946
ENSG00000196747.3	HIST1H2AI	2563.77	1.07608	0.288797	3.72608	0.000194484	0.00544323
ENSG00000204713.6	TRIM27	1662.46	1.00035	0.268561	3.72484	0.000195437	0.00545692
ENSG00000186020.8	ZNF529	844.887	-0.948853	0.254904	-3.72239	0.000197346	0.00549715
ENSG00000178927.12	C17orf62	1192.63	0.854183	0.229712	3.71849	0.000200419	0.00556956
ENSG00000156256.10	USP16	1828.07	-0.945945	0.254489	-3.71704	0.000201574	0.00558846
ENSG00000138834.8	MAPK8IP3	5290.43	-0.659925	0.177603	-3.71574	0.000202612	0.00560402
ENSG00000188042.5	ARL4C	788.485	-1.59519	0.429392	-3.71498	0.000203217	0.00560754
ENSG00000136603.9	SKIL	2805.97	-1.53312	0.413409	-3.70849	0.000208503	0.00572652
ENSG00000196437.6	ZNF569	375.197	1.19601	0.322757	3.70561	0.000210886	0.00577849
ENSG00000136448.7	NMT1	2980.42	0.62106	0.167727	3.70279	0.000213238	0.00582932
ENSG00000114739.9	ACVR2B	959.41	0.915635	0.247399	3.70105	0.000214708	0.00584234
ENSG00000122483.13	CCDC18	832.022	0.771323	0.208392	3.70131	0.000214489	0.00584234
ENSG00000258890.2	CEP95	3037.39	-1.00136	0.270684	-3.69935	0.000216153	0.00584478
ENSG00000033170.12	FUT8	1368.69	0.787787	0.212962	3.69919	0.000216289	0.00584478
ENSG00000065675.10	PRKCQ	2151.25	0.812053	0.219492	3.6997	0.000215855	0.00584478
ENSG00000167613.11	LAIR1	5596.24	0.796145	0.215362	3.69677	0.000218359	0.00588717
ENSG00000116786.7	PLEKHM2	4045.32	-0.918922	0.248731	-3.69444	0.000220368	0.00592775
ENSG00000090861.11	AARS	2836.12	1.00794	0.272917	3.6932	0.000221451	0.00592975
ENSG00000166478.5	ZNF143	712.802	0.983166	0.266174	3.69369	0.000221019	0.00592975
ENSG00000010165.15	METTL13	1124.38	1.05671	0.286297	3.69095	0.000223418	0.00596588
ENSG00000129472.8	RAB2B	650.629	-0.996079	0.269904	-3.6905	0.000223816	0.00596588
ENSG00000124164.11	VAPB	1218.52	0.870592	0.236224	3.68545	0.000228296	0.00607153
ENSG00000130052.9	STARD8	903.252	0.856001	0.232341	3.68425	0.000229376	0.0060865
ENSG00000106952.3	TNFSF8	456.438	1.05897	0.28757	3.68249	0.000230968	0.00611416
ENSG00000165355.7	FBXO33	735.437	-1.12087	0.304664	-3.67903	0.000234124	0.00613358
ENSG00000184357.3	HIST1H1B	7720.4	0.891823	0.2424	3.67915	0.000234017	0.00613358
ENSG00000023287.8	RB1CC1	3283.63	-1.02897	0.279663	-3.67931	0.000233869	0.00613358
ENSG00000133316.11	WDR74	1329.49	1.08589	0.295172	3.67886	0.000234281	0.00613358
ENSG00000138246.11	DNAJC13	2622.77	0.811509	0.220642	3.67795	0.00023512	0.00614186
ENSG00000124529.3	HIST1H4B	1169.13	1.15504	0.314428	3.67345	0.000239294	0.00623703
ENSG00000100225.13	FBXO7	3627.77	-0.679156	0.18504	-3.67032	0.000242247	0.00627228
ENSG00000139651.9	ZNF740	2361.54	0.686548	0.187028	3.67082	0.00024177	0.00627228
ENSG00000135046.9	ANXA1	7239.91	-0.78372	0.213653	-3.66819	0.000244273	0.00628575
ENSG00000168298.4	HIST1H1E	17910.6	-0.763178	0.208059	-3.66809	0.000244372	0.00628575
ENSG00000145708.6	CRHBP	8627.58	0.803123	0.219067	3.66611	0.000246269	0.00632074
ENSG00000103018.12	CYB5B	723.964	0.899522	0.24555	3.6633	0.000248987	0.00634889
ENSG00000125772.8	GPCPD1	1641.6	-0.909447	0.248204	-3.66411	0.000248199	0.00634889
ENSG00000183955.8	SETD8	756.667	-0.864839	0.236069	-3.66351	0.000248785	0.00634889
ENSG00000135823.9	STX6	776.212	1.05383	0.288167	3.65702	0.000255169	0.00648559
ENSG00000108039.13	XPNPEP1	1353.34	-0.696474	0.190464	-3.65673	0.000255451	0.00648559
ENSG00000185787.10	MORF4L1	4564.77	-0.591502	0.161945	-3.6525	0.000259699	0.00656508
ENSG00000131634.9	TMEM204	237.564	1.35076	0.37012	3.64952	0.000262731	0.00662746
ENSG00000164548.6	TRA2A	2952.7	-0.768757	0.21071	-3.6484	0.000263875	0.00664207
ENSG00000009790.10	TRAF3IP3	1550.77	1.16849	0.320474	3.64614	0.000266213	0.00668661
ENSG00000117616.13	C1orf63	4546.18	0.660378	0.181185	3.64478	0.000267622	0.00670767
ENSG00000167378.4	IRGQ	1717.55	-0.972959	0.267108	-3.64256	0.00026994	0.00672276
ENSG00000050344.8	NFE2L3	1298.23	0.986857	0.270894	3.64297	0.000269515	0.00672276
ENSG00000144057.11	ST6GAL2	3186.08	1.06112	0.291233	3.64356	0.000268898	0.00672276
ENSG00000122257.14	RBBP6	5217.86	-0.616677	0.169323	-3.64201	0.000270519	0.00672294
ENSG00000188820.8	FAM26F	453.522	-1.01476	0.2791	-3.63582	0.000277095	0.00687184
ENSG00000167770.7	OTUB1	781.097	-0.732572	0.201617	-3.63348	0.000279619	0.0069053
ENSG00000172716.12	SLFN11	2855.48	0.85312	0.234792	3.63352	0.000279581	0.0069053
ENSG00000001561.6	ENPP4	555.592	-1.14964	0.31688	-3.628	0.000285624	0.00702407
ENSG00000116095.6	PLEKHA3	1606.32	-0.853675	0.235293	-3.62814	0.000285471	0.00702407
ENSG00000140464.15	PML	4504.01	0.661533	0.182428	3.62628	0.000287535	0.0070563
ENSG00000111785.14	RIC8B	500.356	1.12484	0.310349	3.62443	0.000289605	0.00707755
ENSG00000234684.2	SDCBP2-AS1	300.387	1.19956	0.331026	3.62377	0.000290336	0.00707842
ENSG00000114120.7	SLC25A36	2828.97	-0.687339	0.189699	-3.62332	0.000290845	0.00707842
ENSG00000234616.4	JRK	1271.06	1.09714	0.30296	3.62141	0.000293007	0.00711141
ENSG00000117222.9	RBBP5	1213.76	0.769455	0.212495	3.62105	0.00029341	0.00711141
ENSG00000164116.12	GUCY1A3	7947.97	0.880113	0.243168	3.61937	0.000295325	0.0071385
ENSG00000087903.8	RFX2	658.904	-1.38041	0.381543	-3.61797	0.000296923	0.00715232
ENSG00000177606.5	JUN	94077.4	0.782435	0.216368	3.61623	0.000298927	0.00716721
ENSG00000132334.12	PTPRE	1260	-0.985753	0.272593	-3.61621	0.000298946	0.00716721
ENSG00000010244.12	ZNF207	4681.65	-0.603656	0.166972	-3.61532	0.00029998	0.00716721
ENSG00000160072.15	ATAD3B	934.669	-0.800023	0.221336	-3.61452	0.000300904	0.00717469
ENSG00000055070.12	SZRD1	4164.89	-0.659568	0.182532	-3.61344	0.000302165	0.00719019
ENSG00000165997.4	ARL5B	989.09	-1.13126	0.313138	-3.61266	0.000303068	0.00719711
ENSG00000102225.11	CDK16	1531.41	-0.798851	0.221183	-3.61173	0.000304163	0.00720078
ENSG00000114993.11	RTKN	1130.51	0.87104	0.241186	3.61149	0.000304448	0.00720078
ENSG00000104081.9	BMF	1166.33	-1.2233	0.339086	-3.60764	0.000308994	0.00729362
ENSG00000164114.14	MAP9	730.493	-0.976326	0.270792	-3.60545	0.00031161	0.00732913
ENSG00000130449.5	ZSWIM6	759.456	1.00585	0.278988	3.60534	0.000311745	0.00732913
ENSG00000188171.10	ZNF626	244.703	1.27058	0.352682	3.60264	0.000315006	0.007391
ENSG00000086598.6	TMED2	3897.69	-0.619429	0.172032	-3.60066	0.000317407	0.00743251
ENSG00000068745.10	IP6K2	3484.27	-0.84829	0.235679	-3.59934	0.000319024	0.0074437
ENSG00000170836.7	PPM1D	806.554	-0.949932	0.263964	-3.59872	0.000319784	0.0074437
ENSG00000063176.11	SPHK2	377.026	1.09258	0.30359	3.59888	0.000319595	0.0074437
ENSG00000177409.7	SAMD9L	2774.27	1.06052	0.294757	3.59793	0.000320759	0.00745163
ENSG00000165516.6	KLHDC2	1836.91	-0.657499	0.182966	-3.59356	0.000326187	0.00756279
ENSG00000100281.9	HMGXB4	1459.9	-0.900525	0.250656	-3.59267	0.000327306	0.00757379
ENSG00000159593.10	NAE1	1137.8	-0.697008	0.194049	-3.59191	0.000328262	0.00758099
ENSG00000162290.12	DCP1A	3085.06	-0.936336	0.260755	-3.59086	0.000329583	0.00758236
ENSG00000253797.2	UTP14C	716.849	1.08887	0.303235	3.59084	0.000329612	0.00758236
ENSG00000184014.3	DENND5A	7360.55	-0.591601	0.164797	-3.58988	0.000330832	0.00759557
ENSG00000171522.5	PTGER4	3941.82	-1.02196	0.284797	-3.58839	0.000332727	0.00760993
ENSG00000182903.11	ZNF721	1425.34	0.63823	0.177861	3.58837	0.000332752	0.00760993
ENSG00000269858.1	EGLN2	637.902	-0.836156	0.233219	-3.58528	0.000336712	0.00768554
ENSG00000112531.12	QKI	4888.85	-0.623705	0.174033	-3.58383	0.000338596	0.00771355
ENSG00000119878.5	CRIPT	314.934	-0.948373	0.264736	-3.58233	0.000340541	0.0077425
ENSG00000144048.6	DUSP11	742.246	-0.997226	0.278412	-3.58184	0.000341184	0.0077425
ENSG00000162636.11	FAM102B	1655.5	-0.967227	0.270262	-3.57885	0.000345114	0.00780734
ENSG00000123933.10	MXD4	3860.87	-0.903136	0.2526	-3.57537	0.000349739	0.00789095
ENSG00000136280.11	CCM2	1575.02	0.888535	0.24864	3.57359	0.000352123	0.00792951
ENSG00000132912.8	DCTN4	2122.93	-0.973263	0.272497	-3.57165	0.000354745	0.00795807
ENSG00000164484.7	TMEM200A	632.378	1.12221	0.31416	3.57208	0.000354152	0.00795807
ENSG00000198000.7	NOL8	3070.15	0.729986	0.204449	3.57051	0.000356292	0.00797756
ENSG00000134758.9	RNF138	1221.7	-0.771613	0.21614	-3.56997	0.000357018	0.0079786
ENSG00000151929.5	BAG3	672.367	-1.10647	0.31007	-3.56845	0.000359101	0.00799469
ENSG00000175216.10	CKAP5	4444.05	0.587395	0.164651	3.56752	0.000360372	0.00799469
ENSG00000122882.6	ECD	1227.26	-0.787392	0.220715	-3.56746	0.000360458	0.00799469
ENSG00000143851.11	PTPN7	2922.35	0.854012	0.239339	3.56822	0.000359417	0.00799469
ENSG00000139163.11	ETNK1	1835.14	0.70885	0.198805	3.56555	0.000363089	0.00803788
ENSG00000152454.3	ZNF256	728.23	-0.866147	0.243004	-3.56433	0.000364782	0.00806017
ENSG00000184432.5	COPB2	2443.21	0.920875	0.258416	3.56354	0.000365884	0.00806453
ENSG00000172977.8	KAT5	1544.54	-0.790006	0.221712	-3.56321	0.000366351	0.00806453
ENSG00000256771.2	ZNF253	517.918	1.08532	0.304744	3.56142	0.000368856	0.00810448
ENSG00000133805.11	AMPD3	2745.26	0.695065	0.19537	3.55768	0.000374141	0.00820527
ENSG00000245680.5	ZNF585B	778.274	0.985517	0.277711	3.54871	0.000387116	0.00847403
ENSG00000087589.12	CASS4	366.868	1.25386	0.353587	3.54611	0.000390963	0.00854233
ENSG00000258469.1	CHMP4BP1	187.387	-1.50835	0.425621	-3.54389	0.000394272	0.00856832
ENSG00000175857.4	GAPT	1673.63	0.96616	0.272565	3.5447	0.000393063	0.00856832
ENSG00000165417.7	GTF2A1	1326.34	1.05059	0.296454	3.54384	0.00039434	0.00856832
ENSG00000169021.4	UQCRFS1	832.19	-0.962983	0.271966	-3.54082	0.000398884	0.00865106
ENSG00000222894.1	AL662800.1	273.106	1.1041	0.311971	3.53912	0.000401468	0.00868215
ENSG00000263002.3	ZNF234	495.671	1.14005	0.322148	3.5389	0.000401794	0.00868215
ENSG00000184983.5	NDUFA6	480.145	-0.88603	0.250413	-3.53828	0.00040274	0.00868662
ENSG00000141452.5	C18orf8	849.609	-0.938525	0.265374	-3.53662	0.000405287	0.00871479
ENSG00000183496.5	MEX3B	1129.9	0.898945	0.254193	3.53646	0.000405529	0.00871479
ENSG00000159840.11	ZYX	3708.51	-0.719798	0.203623	-3.53495	0.000407859	0.00874887
ENSG00000142634.8	EFHD2	2645.87	-0.79493	0.225332	-3.52782	0.000418994	0.00895505
ENSG00000119231.6	SENP5	1945.76	-0.827841	0.23465	-3.52799	0.000418734	0.00895505
ENSG00000106144.15	CASP2	4826.46	-0.62708	0.177778	-3.52732	0.000419793	0.00895584
ENSG00000128590.4	DNAJB9	603.767	-1.00427	0.284977	-3.52403	0.000425033	0.00898608
ENSG00000160953.10	MUM1	2841.53	0.64251	0.182277	3.52491	0.000423622	0.00898608
ENSG00000113522.9	RAD50	2634.77	0.691924	0.196341	3.5241	0.000424928	0.00898608
ENSG00000121486.7	TRMT1L	768.324	1.12868	0.320113	3.52589	0.000422066	0.00898608
ENSG00000169981.6	ZNF35	799.234	-1.07923	0.306227	-3.52426	0.000424661	0.00898608
ENSG00000182134.11	TDRKH	542.485	1.11552	0.31682	3.52099	0.000429941	0.00907354
ENSG00000129204.12	USP6	696.47	1.35683	0.385508	3.51959	0.00043221	0.00910508
ENSG00000188419.9	CHM	645.568	1.01951	0.289864	3.51719	0.000436139	0.00912607
ENSG00000115649.11	CNPPD1	1381.16	0.78506	0.223213	3.51709	0.000436312	0.00912607
ENSG00000008405.7	CRY1	605.381	-1.16194	0.33034	-3.51739	0.00043581	0.00912607
ENSG00000173726.6	TOMM20	3467.1	-0.662143	0.188246	-3.51743	0.000435745	0.00912607
ENSG00000101200.5	AVP	2120.63	-0.799395	0.227364	-3.51592	0.000438235	0.00915
ENSG00000139343.6	SNRPF	523.092	-1.0413	0.296395	-3.51323	0.000442699	0.00922681
ENSG00000125538.7	IL1B	2176.47	1.11822	0.318396	3.51203	0.000444704	0.00923192
ENSG00000130522.4	JUND	42504	-0.852441	0.242811	-3.51072	0.000446894	0.00923192
ENSG00000186638.11	KIF24	253.046	1.2619	0.359402	3.5111	0.000446263	0.00923192
ENSG00000198625.8	MDM4	7228.37	-0.654265	0.186325	-3.51142	0.000445718	0.00923192
ENSG00000099917.13	MED15	3172.22	-0.593731	0.169106	-3.511	0.00044643	0.00923192
ENSG00000123360.7	PDE1B	566.317	-0.918343	0.261651	-3.5098	0.000448441	0.00923192
ENSG00000113532.8	ST8SIA4	1631.29	0.723662	0.206165	3.51011	0.000447917	0.00923192
ENSG00000146963.13	C7orf55-LUC7L2	1339.85	-0.902452	0.257436	-3.50554	0.000455687	0.00935913
ENSG00000102317.13	RBM3	4816.04	-0.588754	0.167964	-3.50523	0.000456213	0.00935913
ENSG00000144747.10	TMF1	3981.19	-0.669614	0.191093	-3.50413	0.000458105	0.00938157
ENSG00000105248.11	CCDC94	844.417	-0.889259	0.254007	-3.50093	0.000463642	0.00946328
ENSG00000215424.5	MCM3AP-AS1	908.103	0.909481	0.25982	3.50043	0.00046451	0.00946328
ENSG00000155252.12	PI4K2A	280.609	-1.02428	0.292598	-3.50062	0.000464176	0.00946328
ENSG00000116138.8	DNAJC16	1053.47	0.781796	0.223513	3.49777	0.000469167	0.00954162
ENSG00000140548.5	ZNF710	862.329	0.814128	0.232932	3.49513	0.000473838	0.00958685
ENSG00000117091.5	CD48	438.204	-1.35677	0.388329	-3.49386	0.000476097	0.00961602
ENSG00000163219.7	ARHGAP25	3129.47	0.810571	0.232147	3.49163	0.000480084	0.00966333
ENSG00000102189.12	EEA1	1825.59	0.888074	0.254322	3.49193	0.000479538	0.00966333
ENSG00000132669.8	RIN2	651.983	0.703806	0.201667	3.48993	0.000483138	0.00969556
ENSG00000063587.12	ZNF275	1276.68	-0.800113	0.22927	-3.48983	0.000483335	0.00969556
ENSG00000108963.13	DPH1	1053.55	-0.740316	0.212543	-3.48314	0.000495568	0.00988318
ENSG00000140854.8	KATNB1	1423.31	-0.620235	0.178081	-3.48288	0.000496051	0.00988318
ENSG00000134318.9	ROCK2	1815.65	0.929169	0.266746	3.48334	0.000495194	0.00988318
ENSG00000159882.8	ZNF230	270.449	1.42471	0.409024	3.4832	0.000495463	0.00988318
ENSG00000254612.2	RP11-676M6.1	351.555	-1.10082	0.316182	-3.48162	0.000498394	0.00991307
ENSG00000110871.10	COQ5	577.317	1.00601	0.289069	3.48017	0.000501093	0.00994991
ENSG00000142166.8	IFNAR1	931.127	0.819002	0.235374	3.47958	0.000502206	0.0099552
ENSG00000269821.1	KCNQ1OT1	4259.45	0.689215	0.198158	3.47811	0.00050496	0.00999294
ENSG00000157214.9	STEAP2	199.136	1.48912	0.428238	3.47733	0.000506437	0.0100053
ENSG00000177432.6	NAP1L5	455.333	-1.03857	0.298972	-3.47379	0.000513166	0.0101043
ENSG00000198258.6	UBL5	343.894	-1.07309	0.308894	-3.47398	0.000512798	0.0101043
ENSG00000196850.4	PPTC7	1402.49	-0.974331	0.280529	-3.47319	0.000514305	0.0101098
ENSG00000132326.7	PER2	3700.28	-0.968494	0.279072	-3.47041	0.000519668	0.0101642
ENSG00000225492.2	GBP1P1	221.944	1.34694	0.388448	3.4675	0.000525321	0.0102095
ENSG00000153029.10	MR1	889.364	0.683111	0.196946	3.46852	0.000523341	0.0102095
ENSG00000165300.6	SLITRK5	813.286	1.25322	0.361427	3.46743	0.000525456	0.0102095
ENSG00000179119.10	SPTY2D1	1698.29	-0.84495	0.243665	-3.46767	0.000524988	0.0102095
ENSG00000196233.7	LCOR	3337.7	-0.852668	0.245941	-3.46696	0.000526388	0.0102107
ENSG00000166164.11	BRD7	3581.06	-0.654688	0.189015	-3.46369	0.000532822	0.0102888
ENSG00000166200.10	COPS2	1858.09	-0.902698	0.260626	-3.46358	0.000533041	0.0102888
ENSG00000169991.6	IFFO2	1021.92	-0.697507	0.201359	-3.464	0.000532198	0.0102888
ENSG00000137040.8	RANBP6	1685.97	-0.783294	0.226301	-3.46129	0.000537584	0.0103426
ENSG00000249242.3	TMEM150C	382.028	1.13482	0.327837	3.46155	0.000537067	0.0103426
ENSG00000151849.10	CENPJ	1053.88	0.714976	0.206704	3.45894	0.000542313	0.0103657
ENSG00000108771.8	DHX58	634.44	0.848068	0.245146	3.45944	0.000541307	0.0103657
ENSG00000136929.8	HEMGN	3466.58	1.00615	0.29088	3.45899	0.000542213	0.0103657
ENSG00000034677.7	RNF19A	2176.96	-0.873447	0.252474	-3.45955	0.000541076	0.0103657
ENSG00000135775.9	COG2	1032.36	0.814951	0.23574	3.45699	0.000546249	0.010424
ENSG00000068697.6	LAPTM4A	2175.25	-0.757015	0.219273	-3.45238	0.000555661	0.0105615
ENSG00000115946.3	PNO1	349.833	-1.19862	0.347253	-3.45171	0.00055705	0.0105615
ENSG00000100815.8	TRIP11	2408.01	0.797793	0.231103	3.45211	0.000556216	0.0105615
ENSG00000178038.12	ALS2CL	556.271	0.956246	0.277071	3.45127	0.000557952	0.0105616
ENSG00000112406.4	HECA	2865.94	-1.00005	0.289814	-3.45066	0.000559226	0.0105687
ENSG00000101558.9	VAPA	3447.08	-0.698628	0.20271	-3.44644	0.000568034	0.0107007
ENSG00000012817.11	KDM5D	1788.81	-1.48141	0.42995	-3.44554	0.000569911	0.0107189
ENSG00000183943.5	PRKX	1116.96	-0.721294	0.209371	-3.44504	0.000570969	0.0107216
ENSG00000130311.6	DDA1	602.734	-1.103	0.32051	-3.44139	0.000578741	0.0108046
ENSG00000168291.8	PDHB	974.44	0.704181	0.204619	3.44142	0.000578671	0.0108046
ENSG00000127526.9	SLC35E1	1499.35	-0.816125	0.237163	-3.4412	0.00057915	0.0108046
ENSG00000162616.8	DNAJB4	519.779	0.973091	0.28291	3.43957	0.000582636	0.0108368
ENSG00000078699.17	CBFA2T2	2180.33	0.695332	0.202226	3.43839	0.000585183	0.010867
ENSG00000154640.10	BTG3	474.992	-1.21416	0.353396	-3.43569	0.000591046	0.0109413
ENSG00000150907.6	FOXO1	2467.98	-0.786358	0.228929	-3.43494	0.000592674	0.0109542
ENSG00000272888.1	AC013394.2	1727.09	-1.00667	0.293103	-3.43452	0.000593611	0.0109543
ENSG00000119688.16	ABCD4	1661.08	-0.625327	0.182217	-3.43177	0.000599651	0.0110484
ENSG00000138696.6	BMPR1B	412.322	1.06209	0.309683	3.4296	0.000604481	0.0111095
ENSG00000123384.9	LRP1	2122.33	0.726494	0.211841	3.42943	0.000604855	0.0111095
ENSG00000065183.11	WDR3	2034.7	0.986079	0.287593	3.42874	0.000606399	0.0111205
ENSG00000156875.9	HIAT1	1590.36	-0.875099	0.255308	-3.42762	0.000608887	0.0111487
ENSG00000028310.13	BRD9	2233.03	-0.640353	0.187041	-3.42359	0.000617998	0.0112107
ENSG00000141551.10	CSNK1D	3974.69	-0.726122	0.21203	-3.42462	0.000615661	0.0112107
ENSG00000232125.2	DYTN	245.804	1.31129	0.382905	3.42458	0.000615752	0.0112107
ENSG00000163166.9	IWS1	2085.64	0.703836	0.205578	3.42369	0.000617776	0.0112107
ENSG00000141068.9	KSR1	2728.98	-0.850757	0.248446	-3.42431	0.000616359	0.0112107
ENSG00000126773.8	PCNXL4	1366.55	0.704756	0.205803	3.42442	0.000616111	0.0112107
ENSG00000081138.9	CDH7	899.102	1.23515	0.360844	3.42294	0.000619468	0.0112201
ENSG00000054967.8	RELT	1379.4	-1.13397	0.331493	-3.4208	0.000624377	0.0112916
ENSG00000115756.8	HPCAL1	1090.45	0.711501	0.208093	3.41915	0.000628177	0.0113429
ENSG00000204209.6	DAXX	1447.85	0.724801	0.212124	3.41688	0.000633435	0.0113831
ENSG00000126003.6	PLAGL2	1398.01	-0.589691	0.172581	-3.41689	0.000633406	0.0113831
ENSG00000163636.6	PSMD6	1591.59	-0.845784	0.247548	-3.41665	0.000633978	0.0113831
ENSG00000005175.5	RPAP3	964.192	0.824388	0.241304	3.41639	0.000634577	0.0113831
ENSG00000184508.6	HDDC3	262.163	1.06578	0.312151	3.41431	0.000639449	0.011441
ENSG00000107929.10	LARP4B	3035.5	0.779116	0.228282	3.41295	0.000642629	0.011459
ENSG00000206560.6	ANKRD28	12602.9	-0.682152	0.199922	-3.41209	0.00064466	0.0114644
ENSG00000091317.7	CMTM6	1525.89	-0.608435	0.178415	-3.41023	0.000649082	0.0115256
ENSG00000115993.7	TRAK2	1256.52	0.818556	0.240139	3.40867	0.000652793	0.0115608
ENSG00000171291.4	ZNF439	1304.22	0.794341	0.233042	3.40858	0.000653029	0.0115608
ENSG00000076555.11	ACACB	4510.69	0.609604	0.178968	3.40622	0.00065868	0.0116258
ENSG00000130177.10	CDC16	1524.72	0.708198	0.207913	3.40622	0.00065868	0.0116258
ENSG00000213516.5	RBMXL1	1250.31	-0.756621	0.222285	-3.40383	0.000664486	0.0117107
ENSG00000168209.4	DDIT4	2658.42	-1.24659	0.366633	-3.40009	0.000673639	0.0118189
ENSG00000095485.12	CWF19L1	827.79	-0.989896	0.291446	-3.3965	0.000682532	0.011957
ENSG00000052749.9	RRP12	2700.76	-0.785691	0.23148	-3.3942	0.000688294	0.0120043
ENSG00000099194.5	SCD	492.607	-1.08786	0.320488	-3.39439	0.000687822	0.0120043
ENSG00000198046.7	ZNF667	1577.95	-0.766234	0.225737	-3.39436	0.000687883	0.0120043
ENSG00000072210.14	ALDH3A2	805.322	0.917871	0.27049	3.39337	0.00069039	0.0120165
ENSG00000103472.5	RRN3P2	475.896	-0.966471	0.284833	-3.39311	0.000691039	0.0120165
ENSG00000116205.6	TCEANC2	1085.19	0.891699	0.262963	3.39097	0.00069646	0.0120929
ENSG00000145685.9	LHFPL2	1223.67	1.01794	0.300428	3.38829	0.000703292	0.0121935
ENSG00000071967.7	CYBRD1	2979.09	0.980678	0.289706	3.38508	0.000711568	0.012228
ENSG00000108406.5	DHX40	1705.17	-0.628843	0.185831	-3.38396	0.000714491	0.012228
ENSG00000156030.8	ELMSAN1	10435.4	-0.799814	0.236223	-3.38585	0.000709587	0.012228
ENSG00000213240.7	NOTCH2NL	1783.93	0.815505	0.240819	3.38639	0.000708192	0.012228
ENSG00000264112.1	RP11-159D12.2	659.24	-1.01907	0.301153	-3.3839	0.000714644	0.012228
ENSG00000225648.1	SBDSP1	601.663	-1.15337	0.340839	-3.38391	0.000714622	0.012228
ENSG00000113649.7	TCERG1	5096.06	-0.675108	0.199359	-3.38639	0.000708183	0.012228
ENSG00000133872.9	TMEM66	6059.58	-0.741812	0.219084	-3.38597	0.000709277	0.012228
ENSG00000162688.11	AGL	1139.95	0.741089	0.219047	3.38324	0.000716365	0.0122396
ENSG00000185880.8	TRIM69	466.059	0.994313	0.294025	3.38173	0.000720318	0.0122893
ENSG00000106771.8	TMEM245	2069.66	0.737244	0.218146	3.37958	0.000725954	0.0123675
ENSG00000031698.8	SARS	1038.39	0.82332	0.243967	3.37472	0.000738895	0.0125698
ENSG00000109971.9	HSPA8	17499.7	0.659321	0.195406	3.37411	0.000740548	0.0125797
ENSG00000123200.12	ZC3H13	5108.2	0.613262	0.181804	3.37321	0.000742984	0.0126029
ENSG00000081189.9	MEF2C	4441.61	0.588779	0.174569	3.37276	0.000744181	0.012605
ENSG00000040531.10	CTNS	296.447	1.02368	0.303669	3.37102	0.000748895	0.0126666
ENSG00000166579.11	NDEL1	2511.36	-0.619068	0.183673	-3.3705	0.000750329	0.0126726
ENSG00000122034.8	GTF3A	1696.46	-0.626165	0.185819	-3.36975	0.000752356	0.0126886
ENSG00000196937.6	FAM3C	371.363	-1.11002	0.329497	-3.36883	0.000754885	0.0126948
ENSG00000120063.5	GNA13	4095.87	-0.79249	0.23527	-3.36843	0.000755962	0.0126948
ENSG00000176542.5	KIAA2018	4968.92	-0.86805	0.257767	-3.36758	0.000758323	0.0127162
ENSG00000128609.10	NDUFA5	763.906	-0.832851	0.247357	-3.367	0.000759901	0.0127245
ENSG00000104973.10	MED25	1000.67	-0.745438	0.221777	-3.36121	0.000776015	0.0129406
ENSG00000116560.6	SFPQ	27515.4	-0.638068	0.189854	-3.36083	0.000777091	0.0129406
ENSG00000122435.5	TRMT13	494.593	0.955699	0.284367	3.36079	0.000777205	0.0129406
ENSG00000168615.7	ADAM9	831.899	-1.02281	0.30442	-3.35988	0.000779776	0.012965
ENSG00000145414.4	NAF1	657.882	-0.700262	0.208459	-3.35923	0.000781597	0.0129769
ENSG00000148943.7	LIN7C	1004.49	-0.817847	0.243642	-3.35676	0.000788613	0.013075
ENSG00000152242.6	C18orf25	1117.58	-0.735468	0.219203	-3.35519	0.000793091	0.0131122
ENSG00000197013.5	ZNF429	339.522	1.05299	0.313824	3.35534	0.000792666	0.0131122
ENSG00000162869.11	PPP1R21	1124.39	0.8726	0.260343	3.35173	0.000803092	0.0132589
ENSG00000175197.6	DDIT3	1264.65	-1.22046	0.364276	-3.35036	0.000807062	0.0133058
ENSG00000138496.12	PARP9	1071.34	0.604545	0.180623	3.347	0.000816908	0.0134492
ENSG00000213722.4	DDAH2	3168.25	-0.701145	0.209671	-3.34402	0.000825751	0.0135758
ENSG00000246705.3	H2AFJ	577.51	-0.928875	0.277954	-3.34183	0.000832294	0.0136643
ENSG00000197208.5	SLC22A4	122.233	-1.43657	0.430045	-3.34052	0.000836218	0.0137034
ENSG00000176624.9	MEX3C	3294.01	-0.7284	0.218351	-3.33591	0.000850202	0.0138615
ENSG00000118276.7	B4GALT6	2428.7	0.75797	0.227343	3.33404	0.000855931	0.0139163
ENSG00000154642.6	C21orf91	1280.07	0.879245	0.264657	3.32221	0.000893083	0.0145003
ENSG00000088826.13	SMOX	737.97	-1.30446	0.392977	-3.31942	0.000902042	0.0145853
ENSG00000167363.9	FN3K	515.462	0.853727	0.257267	3.31845	0.000905187	0.014596
ENSG00000171163.11	ZNF692	785.501	0.894568	0.269561	3.31861	0.000904658	0.014596
ENSG00000220205.4	VAMP2	1348.13	-0.713234	0.214981	-3.31766	0.000907742	0.014617
ENSG00000197279.3	ZNF165	481.896	-1.22307	0.368696	-3.31728	0.00090898	0.014617
ENSG00000197238.3	HIST1H4J	177.129	1.42617	0.430113	3.31581	0.000913795	0.0146544
ENSG00000120694.15	HSPH1	1658.83	0.683991	0.206275	3.31592	0.00091342	0.0146544
ENSG00000204520.8	MICA	550.723	0.863353	0.260529	3.31384	0.000920228	0.0147374
ENSG00000010818.4	HIVEP2	3249.44	0.590818	0.178353	3.31264	0.000924192	0.0147808
ENSG00000159131.12	GART	1484.55	0.815527	0.246255	3.31172	0.000927257	0.0147918
ENSG00000136802.7	LRRC8A	1837	-0.857031	0.258831	-3.31117	0.000929082	0.0147918
ENSG00000120526.6	NUDCD1	683.033	0.949702	0.286841	3.31089	0.000929982	0.0147918
ENSG00000125870.6	SNRPB2	1005.62	-0.808102	0.2441	-3.31054	0.000931175	0.0147918
ENSG00000215788.5	TNFRSF25	149.838	1.36868	0.413366	3.31106	0.000929432	0.0147918
ENSG00000173812.6	EIF1	12365	-0.689085	0.20855	-3.30417	0.000952571	0.0150706
ENSG00000183309.7	ZNF623	1435.22	0.745915	0.22589	3.30211	0.000959608	0.0151412
ENSG00000144677.10	CTDSPL	1787.21	0.592375	0.179435	3.30133	0.000962277	0.015163
ENSG00000085185.11	BCORL1	1773.78	0.824611	0.24994	3.29923	0.000969491	0.0152358
ENSG00000167552.9	TUBA1A	7080.74	-0.607957	0.184548	-3.2943	0.000986667	0.015485
ENSG00000122547.6	EEPD1	389.624	-0.831289	0.252389	-3.29369	0.00098883	0.0154983
ENSG00000182827.8	ACBD3	1400.67	-0.591553	0.179675	-3.29235	0.000993548	0.0155249
ENSG00000140006.7	WDR89	524.973	0.894909	0.271837	3.29208	0.000994491	0.0155249
ENSG00000103550.9	KNOP1	562.419	0.970142	0.29483	3.29051	0.00100006	0.0155911
ENSG00000111269.2	CREBL2	743.946	0.935084	0.284352	3.28847	0.00100734	0.0156838
ENSG00000110906.8	KCTD10	933.316	-0.738049	0.224488	-3.2877	0.00101008	0.0157056
ENSG00000089818.12	NECAP1	784.019	-0.920618	0.280238	-3.28513	0.00101937	0.0158083
ENSG00000174469.13	CNTNAP2	126.252	-1.40739	0.428794	-3.28222	0.00102994	0.0159129
ENSG00000204568.7	MRPS18B	1569.58	0.694904	0.211722	3.28215	0.00103018	0.0159129
ENSG00000172795.11	DCP2	1760.7	0.684525	0.208619	3.28123	0.00103357	0.0159235
ENSG00000116604.13	MEF2D	3725.16	-0.68582	0.209007	-3.28132	0.00103322	0.0159235
ENSG00000179933.4	C14orf119	212.708	1.19343	0.363904	3.27951	0.00103988	0.0159997
ENSG00000108506.7	INTS2	711.576	0.7065	0.215601	3.27689	0.00104958	0.0161068
ENSG00000137494.9	ANKRD42	1332.44	0.748838	0.228711	3.27416	0.00105975	0.0161943
ENSG00000128805.10	ARHGAP22	2601.56	0.91046	0.278048	3.27447	0.00105862	0.0161943
ENSG00000179163.11	FUCA1	521.388	1.1008	0.33635	3.27279	0.00106493	0.0161943
ENSG00000154845.11	PPP4R1	2405.74	-0.842924	0.257534	-3.27306	0.0010639	0.0161943
ENSG00000198742.5	SMURF1	1570.36	-0.97576	0.298135	-3.27287	0.0010646	0.0161943
ENSG00000163541.7	SUCLG1	957.19	-0.746703	0.228102	-3.27355	0.00106207	0.0161943
ENSG00000156273.11	BACH1	2791.06	-0.73742	0.22546	-3.27073	0.0010727	0.0162914
ENSG00000113360.12	DROSHA	3255.1	0.635312	0.194604	3.26464	0.00109604	0.0166244
ENSG00000196876.9	SCN8A	195.138	1.30784	0.40087	3.26251	0.00110431	0.0167068
ENSG00000163806.11	SPDYA	154.067	-1.19536	0.366668	-3.26005	0.00111391	0.0167957
ENSG00000078687.12	TNRC6C	2158.58	0.666815	0.204556	3.25982	0.00111484	0.0167957
ENSG00000127824.9	TUBA4A	482.422	1.10764	0.339815	3.25955	0.00111591	0.0167957
ENSG00000132475.4	H3F3B	19543.4	-0.879182	0.269829	-3.2583	0.00112083	0.0168483
ENSG00000135829.12	DHX9	8252.09	-0.595806	0.182939	-3.25685	0.00112655	0.0169126
ENSG00000198876.8	DCAF12	2334.25	0.924516	0.283969	3.25569	0.00113116	0.0169602
ENSG00000101082.9	SLA2	555.587	-0.736967	0.226505	-3.25364	0.00113936	0.0170397
ENSG00000116871.11	MAP7D1	5291.05	-0.619584	0.19057	-3.25121	0.00114913	0.017164
ENSG00000066294.10	CD84	1881.37	0.746555	0.229906	3.24722	0.00116537	0.0173844
ENSG00000126067.7	PSMB2	643.004	-0.89353	0.275301	-3.24565	0.00117182	0.0174585
ENSG00000072310.12	SREBF1	1673.32	-0.762287	0.235025	-3.24342	0.00118103	0.0175735
ENSG00000050405.9	LIMA1	1791.21	0.732705	0.22594	3.24291	0.00118314	0.0175825
ENSG00000136485.10	DCAF7	4703.22	0.832298	0.256733	3.24188	0.00118743	0.0176241
ENSG00000171222.6	SCAND1	726.066	-0.752819	0.232298	-3.24075	0.00119216	0.0176719
ENSG00000186812.8	ZNF397	719.361	0.845333	0.261093	3.23767	0.0012051	0.0178413
ENSG00000115165.5	CYTIP	1164.51	-0.710063	0.219567	-3.23392	0.00122102	0.0180315
ENSG00000005961.13	ITGA2B	2004.57	0.855855	0.264816	3.23188	0.00122977	0.0181379
ENSG00000172086.7	KRCC1	1148.96	0.947789	0.293539	3.22884	0.00124295	0.0183094
ENSG00000158769.13	F11R	1206.48	-0.747392	0.23154	-3.22792	0.00124694	0.0183451
ENSG00000165233.13	C9orf89	1129.66	-0.699486	0.216815	-3.22618	0.00125453	0.0183877
ENSG00000104856.9	RELB	1520.36	-1.19778	0.371201	-3.22678	0.00125192	0.0183877
ENSG00000167460.10	TPM4	4135.06	-0.669012	0.207352	-3.22646	0.00125332	0.0183877
ENSG00000085982.9	USP40	1277.17	0.80182	0.24865	3.22469	0.00126108	0.0184607
ENSG00000235316.1	DUSP8P5	366.864	-1.04492	0.324082	-3.22426	0.00126299	0.0184657
ENSG00000158321.11	AUTS2	1675.96	-0.654031	0.203051	-3.22102	0.00127736	0.0186087
ENSG00000262246.1	CORO7	274.469	-1.22691	0.380995	-3.22027	0.00128068	0.0186087
ENSG00000203814.5	HIST2H2BF	1951.28	0.827211	0.256871	3.22034	0.00128041	0.0186087
ENSG00000197989.9	SNHG12	1598.13	0.745537	0.231467	3.22092	0.00127781	0.0186087
ENSG00000133424.16	LARGE	167.874	1.05853	0.328862	3.21875	0.00128749	0.0186615
ENSG00000123095.5	BHLHE41	189.713	1.37949	0.42868	3.21799	0.0012909	0.0186879
ENSG00000186470.9	BTN3A2	2036.19	0.698374	0.217101	3.21682	0.0012962	0.0187416
ENSG00000132801.5	ZSWIM3	247.283	1.26846	0.394714	3.21361	0.00131075	0.0189286
ENSG00000179151.7	EDC3	1292.5	0.768637	0.239255	3.21263	0.00131527	0.0189706
ENSG00000152484.9	USP12	1608.17	-0.946178	0.294555	-3.21223	0.0013171	0.0189737
ENSG00000168259.10	DNAJC7	2724.88	-0.67146	0.209104	-3.21113	0.00132213	0.0189995
ENSG00000125898.8	FAM110A	526.707	1.10864	0.345439	3.20937	0.00133024	0.0190462
ENSG00000148606.8	POLR3A	1388.63	0.803494	0.25035	3.20949	0.00132972	0.0190462
ENSG00000117597.13	DIEXF	1665.96	0.759605	0.237037	3.20459	0.00135257	0.0193189
ENSG00000077458.8	FAM76B	1545.53	-0.773287	0.241358	-3.2039	0.0013558	0.0193416
ENSG00000189298.9	ZKSCAN3	787.704	1.06872	0.333719	3.20247	0.00136256	0.0194144
ENSG00000167685.10	ZNF444	446.875	0.931495	0.291074	3.2002	0.00137334	0.0195443
ENSG00000086062.8	B4GALT1	1671.37	-0.594244	0.185727	-3.19955	0.00137644	0.0195648
ENSG00000121542.7	SEC22A	206.307	0.912124	0.285219	3.19798	0.00138395	0.0196241
ENSG00000120868.9	APAF1	1213.94	0.696867	0.218143	3.19454	0.00140055	0.0198355
ENSG00000095066.7	HOOK2	576.158	0.926734	0.290276	3.1926	0.00140999	0.0199452
ENSG00000163517.10	HDAC11	302.394	0.980107	0.307217	3.19028	0.00142136	0.0200577
ENSG00000186480.8	INSIG1	1975.61	-1.01702	0.319067	-3.18749	0.00143512	0.0200832
ENSG00000197345.8	MRPL21	614.452	-0.837452	0.262668	-3.18825	0.00143138	0.0200832
ENSG00000214357.4	NEURL1B	1941.78	1.02828	0.322593	3.18755	0.00143483	0.0200832
ENSG00000090020.6	SLC9A1	645.508	0.767349	0.240696	3.18805	0.00143238	0.0200832
ENSG00000171448.8	ZBTB26	590.208	-0.995671	0.312194	-3.18927	0.00142634	0.0200832
ENSG00000055130.11	CUL1	2386.59	0.717165	0.225064	3.18649	0.00144009	0.0201287
ENSG00000136997.10	MYC	3301.46	0.97457	0.30632	3.18154	0.00146496	0.020452
ENSG00000112245.6	PTP4A1	3250.49	-0.822122	0.258515	-3.18017	0.00147189	0.0205244
ENSG00000135740.12	SLC9A5	154.806	-1.02398	0.322092	-3.17917	0.001477	0.0205712
ENSG00000179454.9	KLHL28	636.604	0.673296	0.211835	3.17841	0.00148088	0.0205777
ENSG00000229807.5	XIST	25574.4	0.743136	0.233809	3.17839	0.00148096	0.0205777
ENSG00000177225.12	PDDC1	836.749	0.700428	0.220422	3.17767	0.00148465	0.0206046
ENSG00000264098.1	CTD-2350C19.1	298.317	0.823314	0.259223	3.17608	0.0014928	0.0206688
ENSG00000105821.10	DNAJC2	2782.6	-0.697672	0.219647	-3.17633	0.00149153	0.0206688
ENSG00000095370.15	SH2D3C	1536.09	0.717313	0.225988	3.17411	0.00150295	0.0207814
ENSG00000187325.4	TAF9B	493.826	-0.779389	0.245568	-3.17382	0.00150447	0.0207814
ENSG00000197162.8	ZNF785	581.88	0.808033	0.254834	3.17083	0.00152006	0.0209231
ENSG00000163041.5	H3F3A	1511.54	-0.591246	0.186502	-3.17018	0.00152347	0.0209455
ENSG00000114450.5	GNB4	1267.01	-0.856059	0.270541	-3.16425	0.00155482	0.0213139
ENSG00000038274.12	MAT2B	2161.61	0.797674	0.252102	3.16409	0.00155571	0.0213139
ENSG00000143862.3	ARL8A	872.912	-0.944639	0.298633	-3.16321	0.00156041	0.0213535
ENSG00000072364.8	AFF4	5991.03	-0.699897	0.221466	-3.16029	0.00157611	0.0215432
ENSG00000269728.1	RP11-145M9.4	303.878	-0.964389	0.305308	-3.15875	0.0015845	0.0215826
ENSG00000160712.8	IL6R	2108.32	0.862864	0.273251	3.15777	0.00158984	0.0216302
ENSG00000152760.5	TCTEX1D1	769.492	0.857032	0.271495	3.15672	0.00159557	0.0216831
ENSG00000077782.15	FGFR1	807.803	-1.07978	0.342182	-3.15557	0.00160183	0.0217432
ENSG00000027075.9	PRKCH	3100.17	-0.671278	0.212968	-3.15201	0.00162148	0.0219591
ENSG00000169964.5	TMEM42	297.314	0.907763	0.288406	3.14752	0.00164662	0.0222483
ENSG00000113851.9	CRBN	1711.37	-0.651358	0.207323	-3.14176	0.00167936	0.0226202
ENSG00000146350.9	TBC1D32	478.237	0.970282	0.308843	3.14166	0.00167992	0.0226202
ENSG00000119689.10	DLST	2871.71	-0.689843	0.219607	-3.14126	0.00168225	0.022624
ENSG00000138433.11	CIR1	1521.51	-0.793288	0.252669	-3.13963	0.00169162	0.0226739
ENSG00000005059.11	CCDC109B	424.427	-0.771142	0.246003	-3.13469	0.00172038	0.0230331
ENSG00000229236.1	TTTY10	138.712	-1.14521	0.365402	-3.13411	0.00172379	0.0230525
ENSG00000171492.10	LRRC8D	1836.6	0.755723	0.241205	3.13311	0.00172964	0.0230783
ENSG00000117481.6	NSUN4	1581.17	-0.62991	0.201277	-3.12957	0.0017506	0.0233314
ENSG00000059758.3	CDK17	2497.36	-0.795566	0.254346	-3.12789	0.00176064	0.0234055
ENSG00000181472.4	ZBTB2	563.17	-0.796826	0.254769	-3.12764	0.00176213	0.0234055
ENSG00000150593.11	PDCD4	3769.06	-0.646014	0.206657	-3.12602	0.00177192	0.0235089
ENSG00000143811.12	PYCR2	755.904	0.816375	0.261186	3.12564	0.00177418	0.0235124
ENSG00000197798.4	FAM118B	328.166	1.10705	0.354352	3.12415	0.0017832	0.0235787
ENSG00000112972.10	HMGCS1	913.996	-0.65682	0.210285	-3.12348	0.00178725	0.0236022
ENSG00000152409.8	JMY	3413.24	-0.797469	0.255422	-3.12216	0.00179528	0.0236049
ENSG00000105967.11	TFEC	1974.87	0.701191	0.224608	3.12184	0.00179723	0.0236049
ENSG00000204524.5	ZNF805	1440.9	-0.875876	0.280515	-3.12238	0.00179392	0.0236049
ENSG00000116157.5	GPX7	326.027	-0.860694	0.275854	-3.12011	0.00180786	0.023718
ENSG00000069956.7	MAPK6	1813.08	-0.835762	0.268049	-3.11795	0.00182116	0.0238394
ENSG00000176994.9	SMCR8	2536.76	-0.696477	0.223371	-3.11802	0.00182068	0.0238394
ENSG00000204186.3	ZDBF2	720.596	-0.977951	0.313719	-3.11729	0.00182524	0.0238662
ENSG00000123427.11	METTL21B	314.219	1.08955	0.349564	3.11688	0.00182775	0.0238725
ENSG00000166886.8	NAB2	476.725	0.785415	0.252029	3.11637	0.0018309	0.0238871
ENSG00000095380.10	NANS	1397.85	-0.680079	0.218286	-3.11554	0.00183611	0.023902
ENSG00000256525.2	POLG2	903.727	0.775104	0.248786	3.11555	0.00183605	0.023902
ENSG00000108272.9	DHRS11	231.318	-0.916622	0.294316	-3.11441	0.00184311	0.0239427
ENSG00000259330.1	LINC00984	717.207	-0.995246	0.319565	-3.11438	0.00184332	0.0239427
ENSG00000168876.4	ANKRD49	779.109	-0.951383	0.305532	-3.11385	0.0018466	0.0239504
ENSG00000139977.9	NAA30	906.878	-0.717288	0.23037	-3.11363	0.00184798	0.0239504
ENSG00000122512.10	PMS2	651.779	0.774225	0.24874	3.11259	0.00185454	0.0239825
ENSG00000106261.12	ZKSCAN1	12013.2	0.61015	0.196008	3.11288	0.00185273	0.0239825
ENSG00000139971.11	C14orf37	239.076	1.24382	0.399745	3.11152	0.00186124	0.0240316
ENSG00000196428.8	TSC22D2	3841	-0.823163	0.264569	-3.11134	0.00186243	0.0240316
ENSG00000133773.7	CCDC59	1280.99	-0.757119	0.243448	-3.10998	0.00187103	0.0241162
ENSG00000169032.5	MAP2K1	1006.74	-0.68023	0.218764	-3.10942	0.00187453	0.0241266
ENSG00000124374.8	PAIP2B	654.552	1.00787	0.324188	3.1089	0.00187783	0.0241266
ENSG00000198455.3	ZXDB	1242.74	-0.850085	0.273579	-3.10727	0.00188823	0.0242316
ENSG00000149547.10	EI24	1883.66	-0.649363	0.20901	-3.10685	0.00189095	0.02424
ENSG00000134453.11	RBM17	2744.59	-0.586636	0.188894	-3.10563	0.00189877	0.0243138
ENSG00000126524.5	SBDS	1770.82	-0.925199	0.298462	-3.09989	0.00193595	0.0247245
ENSG00000141985.5	SH3GL1	961.671	-0.828784	0.267391	-3.09952	0.00193835	0.0247245
ENSG00000174032.12	SLC25A30	2296.73	0.696672	0.224778	3.09938	0.00193926	0.0247245
ENSG00000267519.2	MIR24-2	1124.24	-1.05259	0.33979	-3.09775	0.00194995	0.0248071
ENSG00000019485.8	PRDM11	1326.87	0.783588	0.253004	3.09713	0.00195404	0.0248322
ENSG00000005156.7	LIG3	2470.28	-0.611119	0.19739	-3.096	0.00196148	0.0248998
ENSG00000184857.7	TMEM186	128.114	1.26476	0.408718	3.09446	0.0019717	0.0250025
ENSG00000100523.10	DDHD1	1313.1	-0.667797	0.215929	-3.09267	0.00198367	0.0251001
ENSG00000114656.6	KIAA1257	315.598	0.96051	0.310847	3.08998	0.00200171	0.0253011
ENSG00000158406.2	HIST1H4H	959.839	0.871266	0.282234	3.08704	0.00202162	0.0254434
ENSG00000100949.10	RABGGTA	370.656	0.74995	0.24289	3.08761	0.00201776	0.0254434
ENSG00000186918.9	ZNF395	2036.67	-0.651607	0.211042	-3.08758	0.00201796	0.0254434
ENSG00000131263.8	RLIM	5271.1	-0.602921	0.195388	-3.08576	0.00203031	0.0254982
ENSG00000105339.6	DENND3	1734.82	-0.834685	0.270567	-3.08494	0.00203592	0.0255413
ENSG00000101654.13	RNMT	2335.62	-0.696892	0.22594	-3.08441	0.00203954	0.0255595
ENSG00000165240.13	ATP7A	893.121	0.85052	0.275811	3.0837	0.0020444	0.0255791
ENSG00000182923.12	CEP63	1189.57	0.747578	0.24244	3.08355	0.00204546	0.0255791
ENSG00000164251.4	F2RL1	1282.91	0.789961	0.256305	3.08211	0.00205537	0.0256527
ENSG00000153214.5	TMEM87B	1298.12	0.855626	0.277615	3.08206	0.0020557	0.0256527
ENSG00000253251.2	CTC-534A2.2	188.366	-1.30887	0.425139	-3.07869	0.00207916	0.0259128
ENSG00000196663.11	TECPR2	1095.99	0.812837	0.264043	3.07843	0.00208096	0.0259128
ENSG00000198374.3	HIST1H2AL	599.171	1.16378	0.378147	3.07758	0.00208688	0.0259316
ENSG00000166825.9	ANPEP	1514.76	-0.782498	0.254312	-3.07692	0.00209152	0.0259617
ENSG00000159346.8	ADIPOR1	2273.26	-0.844085	0.274438	-3.07569	0.00210015	0.0260207
ENSG00000105186.10	ANKRD27	2801.42	0.615589	0.200279	3.07366	0.00211448	0.0260207
ENSG00000127528.5	KLF2	2468.12	-1.03487	0.336595	-3.07452	0.00210839	0.0260207
ENSG00000143384.8	MCL1	25073.2	-0.723358	0.235248	-3.07488	0.00210588	0.0260207
ENSG00000108559.7	NUP88	1337.9	-0.669901	0.217933	-3.07388	0.00211291	0.0260207
ENSG00000131876.12	SNRPA1	977.579	-0.870955	0.283372	-3.07355	0.00211531	0.0260207
ENSG00000115486.7	GGCX	810.629	0.649472	0.211459	3.07139	0.00213066	0.0261465
ENSG00000003436.10	TFPI	4217.13	-0.608597	0.198152	-3.07136	0.00213087	0.0261465
ENSG00000107614.17	TRDMT1	650.075	-0.793149	0.258268	-3.07104	0.00213318	0.0261476
ENSG00000147650.7	LRP12	628.907	-0.703411	0.229112	-3.07016	0.00213943	0.0261968
ENSG00000171823.6	FBXL14	785.44	-0.665215	0.216781	-3.0686	0.00215063	0.0262793
ENSG00000169155.5	ZBTB43	1329.28	-0.965878	0.314744	-3.06877	0.0021494	0.0262793
ENSG00000179348.7	GATA2	8983.6	0.608762	0.19849	3.06696	0.00216244	0.0263688
ENSG00000160219.7	GAB3	1587.1	0.679371	0.221653	3.06502	0.00217654	0.0265132
ENSG00000159917.10	ZNF235	252.47	1.03658	0.338343	3.06371	0.00218611	0.0266022
ENSG00000055211.8	GINM1	957.658	-0.882467	0.288109	-3.06296	0.00219161	0.0266415
ENSG00000153707.11	PTPRD	509.142	-1.13166	0.369657	-3.06139	0.00220315	0.0267541
ENSG00000198585.7	NUDT16	903.214	0.709549	0.231813	3.06086	0.00220699	0.0267731
ENSG00000042062.7	FAM65C	1902.34	0.682469	0.223265	3.05676	0.00223741	0.0271142
ENSG00000162642.9	C1orf52	536.068	-0.929692	0.30428	-3.05538	0.00224774	0.0271833
ENSG00000198865.5	CCDC152	383.134	0.947995	0.310252	3.05556	0.00224637	0.0271833
ENSG00000197355.6	UAP1L1	771.411	0.755205	0.247439	3.05209	0.00227257	0.0274271
ENSG00000124459.7	ZNF45	1065.18	0.705931	0.231343	3.05144	0.00227744	0.0274362
ENSG00000132313.10	MRPL35	277.815	1.07697	0.353385	3.04759	0.00230687	0.0276989
ENSG00000165802.15	NSMF	1463.34	-0.714884	0.234689	-3.0461	0.00231834	0.0277799
ENSG00000100226.11	GTPBP1	2554.1	-0.669755	0.219981	-3.04461	0.00232983	0.0278711
ENSG00000119414.7	PPP6C	1543.77	-0.681605	0.223881	-3.0445	0.0023307	0.0278711
ENSG00000169926.5	KLF13	5347.76	-0.818293	0.268923	-3.04285	0.00234348	0.0279672
ENSG00000197063.6	MAFG	1978.76	-0.839653	0.275929	-3.04301	0.00234224	0.0279672
ENSG00000090273.9	NUDC	1051.03	-0.699641	0.229973	-3.04228	0.00234796	0.0279921
ENSG00000155438.7	MKI67IP	1309.68	0.604686	0.198792	3.04181	0.00235159	0.0280071
ENSG00000240356.2	RPL23AP7	267.611	1.20076	0.394795	3.04148	0.00235422	0.0280099
ENSG00000165983.10	PTER	615.032	0.921809	0.30312	3.04107	0.0023574	0.0280195
ENSG00000115904.8	SOS1	3630.47	0.670587	0.220537	3.0407	0.0023603	0.0280256
ENSG00000136870.6	ZNF189	1391.4	0.658713	0.216793	3.03844	0.00237805	0.0282078
ENSG00000105856.9	HBP1	2989.7	-0.819271	0.269739	-3.03727	0.00238729	0.0282517
ENSG00000161011.15	SQSTM1	5583.09	-0.743339	0.244756	-3.03706	0.00238896	0.0282517
ENSG00000248835.2	AL357673.1	433.65	1.03016	0.339519	3.03416	0.00241203	0.0284673
ENSG00000116922.10	C1orf109	326.296	0.964205	0.317899	3.03306	0.00242089	0.0285165
ENSG00000172247.3	C1QTNF4	835.13	-0.992851	0.327346	-3.03304	0.00242105	0.0285165
ENSG00000137198.5	GMPR	564.526	0.935814	0.308714	3.03133	0.00243478	0.0286067
ENSG00000109654.10	TRIM2	301.412	1.00829	0.332639	3.03118	0.00243602	0.0286067
ENSG00000015171.14	ZMYND11	2444.82	0.712427	0.235303	3.0277	0.00246422	0.0288803
ENSG00000116731.18	PRDM2	3974.14	-0.701595	0.232279	-3.02048	0.00252371	0.0294308
ENSG00000181220.11	ZNF746	1633.66	-0.637285	0.210985	-3.02051	0.00252345	0.0294308
ENSG00000104312.6	RIPK2	1252.52	-0.712784	0.236015	-3.02007	0.00252715	0.0294417
ENSG00000204574.8	ABCF1	2754.23	-0.603994	0.200095	-3.01853	0.00254002	0.0295502
ENSG00000159314.7	ARHGAP27	2079.23	0.606152	0.200822	3.01836	0.00254149	0.0295502
ENSG00000262944.1	RP11-473I1.9	828.22	-0.850297	0.282029	-3.01493	0.00257041	0.0297988
ENSG00000109220.6	CHIC2	928.395	-0.831241	0.275788	-3.01405	0.00257781	0.0298544
ENSG00000154678.12	PDE1C	565.66	1.19979	0.398172	3.01325	0.00258465	0.029904
ENSG00000132819.12	RBM38	701.507	-1.06721	0.354237	-3.0127	0.00258934	0.0299288
ENSG00000158373.7	HIST1H2BD	11962.4	0.715711	0.237609	3.01214	0.00259411	0.0299546
ENSG00000172175.8	MALT1	718.137	-0.860683	0.285859	-3.01087	0.00260501	0.0300509
ENSG00000197782.10	ZNF780A	340.36	0.995394	0.330809	3.00897	0.00262135	0.0301871
ENSG00000111860.9	CEP85L	1313.67	-0.728406	0.242239	-3.00698	0.0026386	0.0303491
ENSG00000165507.8	C10orf10	877.028	1.07798	0.358574	3.00629	0.0026446	0.0303673
ENSG00000134265.8	NAPG	733.202	-0.842452	0.280251	-3.00607	0.00264652	0.0303673
ENSG00000035862.8	TIMP2	2795.25	0.605962	0.201591	3.0059	0.00264794	0.0303673
ENSG00000126775.8	ATG14	1810.35	-0.710871	0.236638	-3.00405	0.00266413	0.0304048
ENSG00000132823.6	OSER1	1795.58	-0.724375	0.241068	-3.00486	0.00265704	0.0304048
ENSG00000150681.5	RGS18	478.441	0.998181	0.332232	3.00447	0.00266042	0.0304048
ENSG00000020256.15	ZFP64	766.519	0.85378	0.284125	3.00494	0.00265632	0.0304048
ENSG00000166261.6	ZNF202	909.466	0.843239	0.280692	3.00414	0.00266332	0.0304048
ENSG00000125107.12	CNOT1	9797.7	0.621213	0.206844	3.00329	0.00267075	0.0304235
ENSG00000072571.15	HMMR	192.353	1.05405	0.350989	3.00308	0.00267262	0.0304235
ENSG00000170734.7	POLH	479.24	0.797127	0.265472	3.00268	0.00267613	0.0304235
ENSG00000125630.11	POLR1B	1365.48	0.849142	0.282792	3.00271	0.00267587	0.0304235
ENSG00000260997.1	RP4-647J21.1	386.424	-0.929586	0.309696	-3.00161	0.00268558	0.0305015
ENSG00000141664.5	ZCCHC2	2657.62	-0.659085	0.219681	-3.00019	0.00269814	0.0306145
ENSG00000130021.9	HDHD1	320.965	1.20446	0.401775	2.99786	0.00271886	0.0306321
ENSG00000104998.2	IL27RA	1445.79	0.741794	0.247317	2.99936	0.00270543	0.0306321
ENSG00000273270.1	RP11-212P7.2	371.926	-0.998146	0.332842	-2.99886	0.00270991	0.0306321
ENSG00000237021.2	RP3-486I3.7	151.082	1.25568	0.418857	2.99787	0.00271873	0.0306321
ENSG00000138434.12	SSFA2	4892.35	-0.659316	0.219943	-2.99767	0.00272054	0.0306321
ENSG00000176108.5	CHMP6	606.519	0.736134	0.245636	2.99685	0.00272786	0.0306851
ENSG00000163104.13	SMARCAD1	1815.75	0.620151	0.206995	2.99597	0.00273574	0.0307234
ENSG00000152117.13	AC093838.4	886.394	-0.836117	0.279179	-2.99491	0.00274525	0.0307531
ENSG00000214176.5	PLEKHM1P	1840.64	-0.735884	0.245753	-2.99441	0.00274976	0.0307531
ENSG00000197170.5	PSMD12	1299.07	-0.848353	0.283338	-2.99414	0.00275221	0.0307531
ENSG00000159210.5	SNF8	450.63	-0.791871	0.264405	-2.99491	0.00274523	0.0307531
ENSG00000256087.2	ZNF432	708.271	-0.809689	0.270415	-2.99424	0.00275126	0.0307531
ENSG00000126814.6	TRMT5	403.214	1.10536	0.36936	2.99264	0.00276577	0.0308752
ENSG00000135241.12	PNPLA8	653.843	-0.83196	0.278228	-2.99021	0.00278787	0.0310924
ENSG00000102178.8	UBL4A	517.858	1.10261	0.368912	2.9888	0.00280072	0.0311765
ENSG00000180917.12	CMTR2	797.018	0.852515	0.285363	2.98748	0.00281291	0.0311942
ENSG00000170185.5	USP38	1394.95	-0.718607	0.24052	-2.98772	0.00281069	0.0311942
ENSG00000128872.5	TMOD2	1491.06	0.756038	0.253124	2.98683	0.00281886	0.0312307
ENSG00000140455.12	USP3	1056.06	-0.81608	0.273633	-2.98239	0.00286006	0.0316573
ENSG00000170852.6	KBTBD2	1748.44	-0.758894	0.254536	-2.98148	0.00286857	0.0317215
ENSG00000206530.4	WDR52	743.323	-0.727219	0.243979	-2.98067	0.00287622	0.0317763
ENSG00000133103.12	COG6	899.105	0.666121	0.223616	2.97886	0.00289327	0.0319047
ENSG00000008128.18	CDK11A	162.379	-1.20439	0.404382	-2.97834	0.00289811	0.0319281
ENSG00000116717.7	GADD45A	909.029	-1.02246	0.343384	-2.97761	0.00290503	0.0319744
ENSG00000136504.7	KAT7	5825.28	-0.628302	0.211148	-2.97565	0.00292366	0.0321453
ENSG00000253200.1	RP11-582J16.5	364.772	-1.00578	0.338032	-2.9754	0.00292603	0.0321453
ENSG00000231508.1	RP11-452K12.6	141.021	1.26229	0.424326	2.97482	0.00293165	0.032177
ENSG00000117586.6	TNFSF4	960.26	0.947643	0.318896	2.97163	0.0029622	0.032482
ENSG00000177173.5	NAP1L4P1	238.106	-1.18558	0.399247	-2.96953	0.00298258	0.03263
ENSG00000070423.13	RNF126	619.482	-0.716622	0.241296	-2.96989	0.00297905	0.03263
ENSG00000001461.12	NIPAL3	1775.14	0.834229	0.281043	2.96833	0.00299424	0.0327112
ENSG00000112149.5	CD83	1053.62	-0.956351	0.322253	-2.9677	0.00300036	0.0327476
ENSG00000115827.9	DCAF17	1117.56	0.680577	0.229416	2.96656	0.00301151	0.0328389
ENSG00000185022.7	MAFF	3932.93	-1.24645	0.420244	-2.96603	0.00301676	0.0328585
ENSG00000060491.12	OGFR	1418.01	0.635791	0.214411	2.96529	0.00302402	0.0328585
ENSG00000120756.8	PLS1	191.332	0.999955	0.337226	2.96524	0.00302449	0.0328585
ENSG00000148634.11	HERC4	1709.5	0.643402	0.217133	2.96317	0.00304491	0.0330497
ENSG00000187990.4	HIST1H2BG	9196.75	0.804906	0.271702	2.96246	0.00305189	0.0330644
ENSG00000176055.9	MBLAC2	594.064	0.985921	0.332785	2.96263	0.00305019	0.0330644
ENSG00000164035.5	EMCN	623.637	0.918365	0.310341	2.95922	0.00308423	0.0333841
ENSG00000090520.6	DNAJB11	1413.45	-0.700082	0.236775	-2.95675	0.00310904	0.0336216
ENSG00000163312.6	HELQ	643.042	0.682926	0.231041	2.95587	0.00311791	0.0336866
ENSG00000179115.6	FARSA	1424.71	0.762155	0.257972	2.9544	0.00313273	0.0338156
ENSG00000146729.5	GBAS	1180.81	-0.742272	0.251394	-2.95263	0.00315082	0.0339553
ENSG00000153922.6	CHD1	5432.8	-0.775008	0.262687	-2.95031	0.00317452	0.0341413
ENSG00000156313.8	RPGR	415.616	-1.17828	0.399483	-2.9495	0.00318288	0.0341999
ENSG00000196792.7	STRN3	1110.3	0.659615	0.223721	2.94839	0.00319438	0.0342609
ENSG00000111011.13	RSRC2	3939.94	-0.67085	0.227612	-2.94734	0.00320522	0.0343458
ENSG00000103381.7	CPPED1	1262.71	0.836183	0.283916	2.94518	0.00322772	0.0345264
ENSG00000197971.10	MBP	3402.61	0.617767	0.209757	2.94515	0.00322795	0.0345264
ENSG00000219665.4	CTD-2006C1.2	390.074	-1.10382	0.375093	-2.94278	0.00325279	0.0347605
ENSG00000178764.6	ZHX2	1310.78	0.76242	0.259183	2.94163	0.00326493	0.0348585
ENSG00000100578.10	KIAA0586	1234.83	0.647124	0.220033	2.94103	0.00327125	0.0348627
ENSG00000174243.5	DDX23	2495.22	0.632865	0.215292	2.93957	0.00328672	0.0349641
ENSG00000258297.1	RP11-658F2.8	401.52	-0.925124	0.31491	-2.93774	0.0033061	0.0351385
ENSG00000150347.10	ARID5B	2396.83	0.681741	0.23214	2.93676	0.00331659	0.0351546
ENSG00000160741.12	CRTC2	1238.81	-0.696194	0.237119	-2.93606	0.00332412	0.0352027
ENSG00000164070.7	HSPA4L	523.159	0.83345	0.283997	2.93471	0.0033386	0.0353242
ENSG00000196072.7	BLOC1S2	299.172	-1.1751	0.400719	-2.93247	0.00336279	0.0354255
ENSG00000114654.6	EFCC1	949.436	0.799576	0.272762	2.9314	0.00337433	0.0354255
ENSG00000138081.15	FBXO11	4288.13	-0.630749	0.215176	-2.93132	0.00337529	0.0354255
ENSG00000108469.10	RECQL5	1433.89	0.588605	0.200798	2.93133	0.00337516	0.0354255
ENSG00000113504.15	SLC12A7	2683	0.683914	0.233227	2.9324	0.00336358	0.0354255
ENSG00000115652.10	UXS1	1451.63	0.612956	0.209056	2.93202	0.00336764	0.0354255
ENSG00000186376.10	ZNF75D	833.285	0.74126	0.252811	2.93207	0.0033671	0.0354255
ENSG00000136950.9	ARPC5L	645.143	-1.07911	0.368368	-2.92944	0.00339575	0.0355004
ENSG00000163001.7	CCDC104	879.229	-0.653167	0.222995	-2.92906	0.0033999	0.0355004
ENSG00000157240.2	FZD1	608.656	-0.920528	0.314228	-2.92949	0.00339517	0.0355004
ENSG00000104825.12	NFKBIB	321.846	-0.901378	0.307742	-2.929	0.00340055	0.0355004
ENSG00000143363.11	PRUNE	493.418	0.861759	0.294086	2.9303	0.00338639	0.0355004
ENSG00000023608.4	SNAPC1	380.878	-0.886505	0.302584	-2.92978	0.00339206	0.0355004
ENSG00000101216.6	GMEB2	1282.35	-0.859563	0.293564	-2.92803	0.00341122	0.0355687
ENSG00000198440.5	ZNF583	259.376	1.03761	0.354392	2.92785	0.00341314	0.0355687
ENSG00000101166.11	SLMO2	673.83	-0.640421	0.218823	-2.92667	0.00342614	0.0356725
ENSG00000000457.9	SCYL3	920.615	0.857316	0.292981	2.92618	0.00343155	0.0356972
ENSG00000102030.11	NAA10	407.299	0.843673	0.288496	2.92438	0.00345139	0.0358085
ENSG00000114423.14	CBLB	1330.72	0.675191	0.231165	2.92082	0.00349108	0.0360929
ENSG00000151445.11	VIPAS39	1033.79	0.718348	0.246107	2.91884	0.00351337	0.0362563
ENSG00000155256.13	ZFYVE27	934.124	-0.683951	0.234452	-2.91723	0.00353152	0.036383
ENSG00000166167.13	BTRC	1181.11	0.687378	0.235909	2.91375	0.00357121	0.0367275
ENSG00000145780.6	FEM1C	1056.82	-0.864917	0.296874	-2.91341	0.00357499	0.0367343
ENSG00000119919.9	NKX2-3	816.957	0.972847	0.334201	2.91096	0.00360318	0.0369271
ENSG00000006625.13	GGCT	531.243	0.816022	0.28049	2.90927	0.00362275	0.0370953
ENSG00000152193.7	RNF219	882.549	0.908506	0.312424	2.90793	0.00363833	0.0372224
ENSG00000121073.9	SLC35B1	640.152	-0.844779	0.290547	-2.90755	0.00364272	0.0372349
ENSG00000198160.10	MIER1	2807.09	-0.616591	0.212116	-2.90686	0.00365081	0.0372702
ENSG00000174175.12	SELP	1670.56	0.826804	0.284447	2.90671	0.00365252	0.0372702
ENSG00000100614.13	PPM1A	2850.46	-0.732182	0.252008	-2.90539	0.00366799	0.0373957
ENSG00000114988.7	LMAN2L	464.096	0.933954	0.321587	2.9042	0.00368194	0.0375054
ENSG00000137720.3	C11orf1	404.913	-0.757502	0.260926	-2.90313	0.00369458	0.0376016
ENSG00000105997.18	HOXA3	1543.66	0.602744	0.207651	2.90267	0.00369996	0.0376237
ENSG00000146109.3	ABT1	532.212	-0.976441	0.336538	-2.90143	0.00371469	0.0377083
ENSG00000271856.1	RP11-861A13.4	120.36	-1.22501	0.422191	-2.90156	0.00371309	0.0377083
ENSG00000184178.11	SCFD2	710.824	0.732457	0.252651	2.89908	0.00374257	0.0378605
ENSG00000097046.8	CDC7	364.652	-0.873267	0.301371	-2.89765	0.00375968	0.0379683
ENSG00000141994.11	DUS3L	1149.28	-0.641734	0.221496	-2.89728	0.00376418	0.037981
ENSG00000173145.7	NOC3L	1444.63	0.770458	0.266474	2.8913	0.00383649	0.0385123
ENSG00000114767.6	RRP9	361.718	1.00517	0.34765	2.89132	0.00383628	0.0385123
ENSG00000156232.6	WHAMM	1522.13	-0.812722	0.281038	-2.89186	0.00382972	0.0385123
ENSG00000148143.8	ZNF462	2499.37	0.751035	0.259742	2.89147	0.00383446	0.0385123
ENSG00000111615.8	KRR1	2774.13	-0.666248	0.230562	-2.88967	0.00385646	0.0386797
ENSG00000272077.1	RP11-348P10.2	228.954	-1.11694	0.386588	-2.88923	0.00386186	0.0387009
ENSG00000163961.4	RNF168	3224.81	-0.740618	0.256384	-2.88871	0.00386829	0.0387323
ENSG00000181381.9	DDX60L	2084.3	0.592023	0.205045	2.88728	0.00388584	0.0388333
ENSG00000139505.10	MTMR6	689.441	-0.885163	0.30654	-2.88759	0.003882	0.0388333
ENSG00000163486.8	SRGAP2	740.58	0.635664	0.220261	2.88596	0.00390219	0.038939
ENSG00000164674.11	SYTL3	256.873	-1.1573	0.401452	-2.88278	0.00394179	0.0392675
ENSG00000122958.10	VPS26A	1056.88	-0.677734	0.235187	-2.88168	0.0039556	0.0393718
ENSG00000165934.8	CPSF2	1497.9	0.654826	0.227441	2.8791	0.0039881	0.0395947
ENSG00000164466.8	SFXN1	1188.15	-0.678186	0.235611	-2.87842	0.00399672	0.0396468
ENSG00000154813.5	DPH3	216.15	0.985787	0.342561	2.87769	0.00400595	0.0396919
ENSG00000125885.9	MCM8	536.775	0.92697	0.32225	2.87655	0.00402044	0.0397479
ENSG00000143507.13	DUSP10	1290.46	-0.710158	0.247088	-2.87411	0.00405168	0.0399225
ENSG00000100711.9	ZFYVE21	579.524	0.939995	0.327018	2.87444	0.00404742	0.0399225
ENSG00000113638.8	TTC33	259.847	1.04448	0.363507	2.87335	0.0040614	0.0399847
ENSG00000134899.13	ERCC5	1089.1	0.656934	0.228653	2.87307	0.0040651	0.0399877
ENSG00000174839.8	DENND6A	1818.14	-0.642465	0.223687	-2.87216	0.00407676	0.0400354
ENSG00000189144.9	ZNF573	544.051	0.784381	0.273089	2.87225	0.00407564	0.0400354
ENSG00000107938.13	C10orf137	1511.91	-0.663559	0.23114	-2.8708	0.00409428	0.0400768
ENSG00000095951.12	HIVEP1	2893.99	-0.736591	0.256596	-2.87063	0.00409658	0.0400768
ENSG00000103066.8	PLA2G15	272.487	0.936727	0.326218	2.87148	0.00408561	0.0400768
ENSG00000121858.6	TNFSF10	651.921	1.07088	0.373053	2.87057	0.00409727	0.0400768
ENSG00000166938.8	DIS3L	1521.43	0.599766	0.20933	2.86517	0.00416784	0.040674
ENSG00000091409.10	ITGA6	2818.28	0.811475	0.283233	2.86505	0.00416948	0.040674
ENSG00000196312.7	HIATL2	271.905	-0.914867	0.319423	-2.86412	0.00418164	0.0407251
ENSG00000099985.3	OSM	164.661	-1.22762	0.42869	-2.86365	0.00418793	0.0407526
ENSG00000196421.3	LINC00176	119.635	-1.22371	0.427456	-2.86277	0.00419957	0.0408046
ENSG00000185532.10	PRKG1	1180.48	1.19264	0.416612	2.86272	0.00420022	0.0408046
ENSG00000113448.12	PDE4D	1907.87	-0.707902	0.247385	-2.86153	0.00421597	0.0409238
ENSG00000138073.9	PREB	872.378	0.785988	0.27479	2.86032	0.00423214	0.0410131
ENSG00000163154.5	TNFAIP8L2	437.044	1.15363	0.403521	2.85891	0.00425097	0.0411616
ENSG00000119392.10	GLE1	1856.33	0.599125	0.209773	2.85606	0.00428934	0.0414648
ENSG00000155980.7	KIF5A	612.331	0.756693	0.264992	2.85553	0.00429652	0.041466
ENSG00000123136.10	DDX39A	1496.33	-0.679748	0.238371	-2.85164	0.00434939	0.0419419
ENSG00000155906.12	RMND1	492.896	0.753478	0.264289	2.85096	0.00435873	0.0419631
ENSG00000163788.9	SNRK	4268.67	-0.585667	0.20557	-2.84899	0.00438576	0.0421542
ENSG00000181744.4	C3orf58	449.799	0.840829	0.295347	2.84692	0.00441447	0.0423609
ENSG00000103037.7	SETD6	752.402	-0.792815	0.278642	-2.84528	0.00443728	0.0425103
ENSG00000240225.6	ZNF542	447.254	0.684762	0.240694	2.84495	0.00444183	0.0425114
ENSG00000124882.3	EREG	3055.14	-0.884013	0.310969	-2.84277	0.00447232	0.0427068
ENSG00000163516.9	ANKZF1	1383.56	0.757054	0.266465	2.8411	0.00449582	0.0428964
ENSG00000114446.4	IFT57	785.766	-0.673411	0.237296	-2.83785	0.00454188	0.0432657
ENSG00000136897.6	MRPL50	1053.8	0.746024	0.262869	2.83801	0.00453955	0.0432657
ENSG00000139174.6	PRICKLE1	132.251	1.21823	0.429537	2.83615	0.00456613	0.0434262
ENSG00000109332.15	UBE2D3	5205.43	-0.611969	0.215877	-2.8348	0.00458548	0.0435751
ENSG00000089335.16	ZNF302	1136.88	0.684695	0.241608	2.83391	0.00459827	0.0436613
ENSG00000170271.6	FAXDC2	751.69	0.771452	0.272309	2.833	0.00461139	0.04368
ENSG00000135521.8	LTV1	1244.82	-0.652864	0.230478	-2.83265	0.00461639	0.0436922
ENSG00000090447.7	TFAP4	830.112	0.778408	0.274826	2.83236	0.00462056	0.0436964
ENSG00000105607.8	GCDH	775.243	0.674193	0.238074	2.83186	0.00462779	0.0437297
ENSG00000112874.5	NUDT12	297.997	0.990988	0.350211	2.82969	0.00465931	0.0439744
ENSG00000111364.11	DDX55	876.318	0.610438	0.215801	2.82871	0.00467354	0.0439852
ENSG00000007341.14	ST7L	863.573	0.724121	0.255967	2.82896	0.0046699	0.0439852
ENSG00000136518.12	ACTL6A	917.308	0.73099	0.258521	2.82759	0.00469003	0.0440446
ENSG00000204439.3	C6orf47	354.293	0.862511	0.30509	2.82707	0.00469758	0.0440446
ENSG00000163832.11	ELP6	543.509	0.874008	0.309164	2.827	0.00469859	0.0440446
ENSG00000175104.10	TRAF6	1044.46	-0.760343	0.26895	-2.82708	0.00469743	0.0440446
ENSG00000173320.5	STOX2	507.849	0.905326	0.320313	2.82638	0.00470771	0.0440598
ENSG00000198520.6	C1orf228	736.753	-0.8055	0.285048	-2.82584	0.00471564	0.0440989
ENSG00000110811.15	LEPREL2	992.079	0.688467	0.243944	2.82224	0.00476899	0.044527
ENSG00000103343.8	ZNF174	296.547	0.892507	0.3163	2.82171	0.00477685	0.0445297
ENSG00000164086.8	DUSP7	843.092	0.988822	0.350538	2.82087	0.00478938	0.0446111
ENSG00000175324.5	LSM1	317.96	-0.75525	0.26781	-2.82009	0.00480095	0.0446481
ENSG00000073536.13	NLE1	766.096	0.750921	0.266273	2.82012	0.00480062	0.0446481
ENSG00000167470.8	MIDN	2837.8	-1.05439	0.373993	-2.81929	0.00481305	0.0447252
ENSG00000155640.5	C10orf12	2357.45	-0.661681	0.234762	-2.81852	0.00482463	0.0447964
ENSG00000110852.4	CLEC2B	1236.76	-0.628471	0.223105	-2.81692	0.0048486	0.0449136
ENSG00000229124.2	VIM-AS1	2192.74	-0.786734	0.279267	-2.81714	0.00484536	0.0449136
ENSG00000133835.10	HSD17B4	2296.82	0.621793	0.220848	2.81548	0.00487039	0.0449658
ENSG00000198478.6	SH3BGRL2	652.33	0.680932	0.241869	2.81529	0.00487337	0.0449658
ENSG00000120137.6	PANK3	3198.44	-0.599888	0.213489	-2.80992	0.00495534	0.0454369
ENSG00000198858.5	R3HDM4	1642.17	-0.852691	0.303393	-2.81051	0.00494624	0.0454369
ENSG00000214485.5	CTB-13H5.1	120.643	-0.965542	0.344149	-2.80559	0.00502245	0.0459446
ENSG00000261101.1	RP4-545K15.5	209.538	-1.09076	0.388769	-2.80567	0.00502115	0.0459446
ENSG00000124224.12	PPP4R1L	478.474	-0.853435	0.304228	-2.80525	0.0050277	0.0459569
ENSG00000145247.7	OCIAD2	787.273	-0.817014	0.291345	-2.80428	0.00504287	0.0460598
ENSG00000067955.9	CBFB	1356.29	-0.633989	0.226148	-2.80343	0.00505626	0.0461463
ENSG00000198301.7	SDAD1	1591.78	0.602341	0.214958	2.80212	0.00507672	0.0462612
ENSG00000160908.14	ZNF394	2826.67	-0.649587	0.23191	-2.80103	0.00509401	0.0463659
ENSG00000160613.8	PCSK7	1471.15	-0.699006	0.249665	-2.79977	0.0051139	0.04642
ENSG00000082458.7	DLG3	630.701	0.770156	0.275181	2.79873	0.00513048	0.0464393
ENSG00000164023.10	SGMS2	191.211	-1.18758	0.424316	-2.7988	0.00512924	0.0464393
ENSG00000143514.12	TP53BP2	2325.11	-0.697251	0.249139	-2.79864	0.00513182	0.0464393
ENSG00000197837.3	HIST4H4	287.871	0.930718	0.332884	2.79592	0.00517521	0.0467958
ENSG00000184939.11	ZFP90	1998.34	0.66554	0.238064	2.79563	0.00517986	0.0468019
ENSG00000251369.4	ZNF550	974.917	0.671788	0.240586	2.7923	0.00523355	0.0472144
ENSG00000134255.9	CEPT1	844.304	0.740128	0.265179	2.79105	0.00525377	0.0473604
ENSG00000004700.11	RECQL	705.449	0.783551	0.28085	2.78993	0.00527195	0.0474879
ENSG00000020633.14	RUNX3	2848.61	-0.786005	0.281807	-2.78916	0.00528443	0.0475275
ENSG00000162702.7	ZNF281	2197.44	-0.683542	0.245066	-2.78921	0.00528362	0.0475275
ENSG00000196704.7	AMZ2	1137.21	-0.617084	0.221405	-2.78713	0.00531766	0.0477533
ENSG00000184863.6	RBM33	7618.75	-0.61051	0.219141	-2.78592	0.00533753	0.0478684
ENSG00000131508.11	UBE2D2	1350.07	-0.656859	0.23582	-2.78542	0.00534585	0.0478967
ENSG00000161526.10	SAP30BP	2030.09	-0.687454	0.246877	-2.7846	0.00535938	0.0479449
ENSG00000100764.9	PSMC1	573.569	-0.824732	0.296292	-2.78352	0.00537733	0.0480323
ENSG00000198113.2	TOR4A	899.967	0.837743	0.301053	2.78271	0.00539073	0.0481154
ENSG00000083799.13	CYLD	4501.74	-0.70541	0.253591	-2.78169	0.00540773	0.048121
ENSG00000059691.7	PET112	660.757	0.697626	0.250753	2.78213	0.00540038	0.048121
ENSG00000111897.6	SERINC1	3391.97	-0.640082	0.230105	-2.7817	0.00540756	0.048121
ENSG00000151148.9	UBE3B	2099.81	0.670747	0.241101	2.78201	0.00540228	0.048121
ENSG00000104218.9	CSPP1	1265.5	-0.660283	0.237659	-2.77828	0.00546467	0.0485542
ENSG00000112237.8	CCNC	1025.74	-0.730934	0.263124	-2.77791	0.00547101	0.0485738
ENSG00000174151.10	CYB561D1	394.449	0.858369	0.309189	2.77619	0.00549994	0.0487938
ENSG00000104756.11	KCTD9	667.035	-0.80301	0.289312	-2.77558	0.0055103	0.0488489
ENSG00000119866.16	BCL11A	6841.86	0.596738	0.215043	2.77498	0.00552056	0.048903
ENSG00000180008.8	SOCS4	1014.55	-0.606192	0.218552	-2.77367	0.00554278	0.0490258
ENSG00000183621.11	ZNF438	374.196	0.739483	0.266684	2.77288	0.00555631	0.0491086
ENSG00000174840.8	PDE12	1090.29	-0.682104	0.246078	-2.7719	0.00557293	0.0492185
ENSG00000139629.11	GALNT6	1557.88	0.637028	0.229892	2.771	0.00558853	0.0493192
ENSG00000184678.8	HIST2H2BE	6006.72	0.60585	0.21866	2.77074	0.00559291	0.0493208
ENSG00000151233.6	GXYLT1	1023.72	0.632177	0.228279	2.76931	0.0056175	0.0495005
ENSG00000068878.10	PSME4	3509.43	-0.756227	0.273103	-2.76902	0.00562258	0.0495054
ENSG00000168806.6	LCMT2	313.563	0.861138	0.311214	2.76703	0.00565697	0.0496622
ENSG00000124380.6	SNRNP27	587.056	-0.722752	0.261189	-2.76716	0.00565468	0.0496622
ENSG00000177311.6	ZBTB38	2124.53	0.660806	0.23886	2.7665	0.00566615	0.0497056
ENSG00000185453.8	C19orf68	148.013	0.98437	0.355897	2.76589	0.00567684	0.0497623
ENSG00000175662.13	TOM1L2	1699.41	0.644763	0.233196	2.7649	0.00569409	0.0498392

## Sheet: All Results HSCe
EnsemblID	GeneSym	baseMean	log2FoldChange	lfcSE	WaldStat	pvalue	padj
ENSG00000000003.10	TSPAN6	222.643	-0.177055	0.413806	-0.427869	0.668746	0.840401
ENSG00000000005.5	TNMD	0	NA	NA	NA	NA	NA
ENSG00000000419.8	DPM1	400.835	-0.162223	0.301834	-0.537458	0.590951	0.794173
ENSG00000000457.9	SCYL3	920.615	0.857316	0.292981	2.92618	0.00343155	0.0356972
ENSG00000000460.12	C1orf112	266.899	-0.00368407	0.418117	-0.00881108	0.99297	0.996786
ENSG00000000938.8	FGR	80.6792	-0.484911	0.430095	-1.12745	0.259552	NA
ENSG00000000971.11	CFH	1705.38	0.649019	0.265542	2.44413	0.0145202	0.0924492
ENSG00000001036.9	FUCA2	343.449	-0.0302271	0.2294	-0.131766	0.89517	0.957743
ENSG00000001084.6	GCLC	983.556	-0.222769	0.202307	-1.10114	0.270834	0.532116
ENSG00000001167.10	NFYA	3100.17	0.274678	0.229158	1.19864	0.230667	0.489569
ENSG00000001460.13	STPG1	137.149	0.429989	0.405791	1.05963	0.289312	0.550837
ENSG00000001461.12	NIPAL3	1775.14	0.834229	0.281043	2.96833	0.00299424	0.0327112
ENSG00000001497.12	LAS1L	2045.31	-0.428899	0.197392	-2.17283	0.029793	0.145379
ENSG00000001561.6	ENPP4	555.592	-1.14964	0.31688	-3.628	0.000285624	0.00702407
ENSG00000001617.7	SEMA3F	5.67246	-0.105755	0.253239	-0.417608	NA	NA
ENSG00000001626.10	CFTR	0	NA	NA	NA	NA	NA
ENSG00000001629.5	ANKIB1	1874.35	0.491161	0.161818	3.03528	0.00240315	0.028391
ENSG00000001630.11	CYP51A1	44.2926	-0.148413	0.402413	-0.368809	0.71227	NA
ENSG00000001631.10	KRIT1	1699.18	0.466748	0.187349	2.49133	0.0127267	0.0849531
ENSG00000002016.12	RAD52	619.781	0.4582	0.280912	1.63111	0.102866	0.305506
ENSG00000002079.8	MYH16	0	NA	NA	NA	NA	NA
ENSG00000002330.9	BAD	452.379	-0.208651	0.305229	-0.683588	0.494235	0.725129
ENSG00000002549.8	LAP3	911.552	0.178883	0.242721	0.736988	0.46113	0.700514
ENSG00000002586.13	CD99	0	NA	NA	NA	NA	NA
ENSG00000002587.5	HS3ST1	16.1984	-0.00556327	0.281126	-0.0197892	0.984212	NA
ENSG00000002726.15	AOC1	22.2983	-0.306272	0.358113	-0.855238	0.392419	NA
ENSG00000002745.8	WNT16	0	NA	NA	NA	NA	NA
ENSG00000002746.10	HECW1	0	NA	NA	NA	NA	NA
ENSG00000002822.11	MAD1L1	945.704	0.282249	0.279525	1.00975	0.312617	0.573563
ENSG00000002834.13	LASP1	4318.34	0.293329	0.15664	1.87264	0.0611185	0.224517
ENSG00000002919.10	SNX11	160.502	-0.0280893	0.397899	-0.0705941	0.943721	0.976449
ENSG00000002933.3	TMEM176A	0.110918	-0.18781	0.220942	-0.85004	0.395303	NA
ENSG00000003056.3	M6PR	3106.63	0.441763	0.21765	2.02969	0.0423881	0.180796
ENSG00000003096.9	KLHL13	205.765	0.646118	0.323087	1.99983	0.0455191	0.188341
ENSG00000003137.4	CYP26B1	114.637	0.511216	0.429929	1.18907	0.234412	NA
ENSG00000003147.13	ICA1	1218.54	-0.148528	0.170313	-0.872086	0.383161	0.635437
ENSG00000003249.9	DBNDD1	67.8033	0.217281	0.429965	0.505345	0.613317	NA
ENSG00000003393.10	ALS2	2441.76	0.482163	0.218665	2.20503	0.0274519	0.137669
ENSG00000003400.10	CASP10	2268.5	-0.218513	0.174188	-1.25447	0.209673	0.465302
ENSG00000003402.15	CFLAR	5933.27	-0.0975641	0.160855	-0.606536	0.544159	0.763589
ENSG00000003436.10	TFPI	4217.13	-0.608597	0.198152	-3.07136	0.00213087	0.0261465
ENSG00000003509.11	NDUFAF7	419.678	-0.181642	0.307104	-0.591466	0.554208	0.770518
ENSG00000003756.12	RBM5	8222.8	0.10996	0.142404	0.772171	0.440013	0.682729
ENSG00000003987.9	MTMR7	8.48009	0.0471445	0.301394	0.156421	0.875701	NA
ENSG00000003989.12	SLC7A2	16.7484	0.523425	0.325601	1.60756	0.107931	NA
ENSG00000004059.6	ARF5	835.854	-0.431148	0.210684	-2.04642	0.0407153	0.176543
ENSG00000004139.9	SARM1	1940.02	0.0904116	0.169995	0.531849	0.594831	0.796201
ENSG00000004142.7	POLDIP2	1644.36	-0.311556	0.203423	-1.53157	0.125629	0.343618
ENSG00000004399.8	PLXND1	7835.35	-0.139968	0.113875	-1.22914	0.21902	0.476735
ENSG00000004455.12	AK2	2640.21	-0.00780231	0.213899	-0.0364767	0.970902	0.987514
ENSG00000004468.8	CD38	586.777	-0.346617	0.330175	-1.0498	0.29381	0.554996
ENSG00000004478.5	FKBP4	4355	0.145845	0.215952	0.675357	0.499449	0.72932
ENSG00000004487.11	KDM1A	4870.46	-0.330305	0.150404	-2.19612	0.0280833	0.139881
ENSG00000004534.10	RBM6	4097.24	0.162586	0.167663	0.96972	0.332186	0.591643
ENSG00000004660.10	CAMKK1	360.065	0.0682	0.305114	0.223523	0.823128	0.92424
ENSG00000004700.11	RECQL	705.449	0.783551	0.28085	2.78993	0.00527195	0.0474879
ENSG00000004766.11	CCDC132	554.744	0.457825	0.264678	1.72975	0.0836758	0.269234
ENSG00000004776.7	HSPB6	1.10045	0.267513	0.249	1.07435	NA	NA
ENSG00000004777.14	ARHGAP33	823.673	-0.115601	0.233697	-0.494663	0.620838	0.811244
ENSG00000004779.5	NDUFAB1	221.992	-0.013497	0.400634	-0.0336892	0.973125	0.987853
ENSG00000004799.7	PDK4	146.457	0.53037	0.429724	1.23421	0.217125	0.474509
ENSG00000004809.9	SLC22A16	388.3	0.645869	0.346136	1.86594	0.0620495	0.226801
ENSG00000004838.9	ZMYND10	22.3142	0.344893	0.311421	1.10748	0.268086	NA
ENSG00000004846.12	ABCB5	2.34569	0.275467	0.251674	1.09454	NA	NA
ENSG00000004848.6	ARX	0	NA	NA	NA	NA	NA
ENSG00000004864.9	SLC25A13	575.879	-0.58709	0.259345	-2.26374	0.0235903	0.125471
ENSG00000004866.14	ST7	1367.75	-0.0609854	0.15711	-0.388169	0.697891	0.858308
ENSG00000004897.7	CDC27	1675.18	0.15814	0.206321	0.766474	0.443394	0.685475
ENSG00000004939.9	SLC4A1	2.97254	-0.276897	0.252134	-1.09821	NA	NA
ENSG00000004948.9	CALCR	0	NA	NA	NA	NA	NA
ENSG00000004961.10	HCCS	284.187	-0.382413	0.303292	-1.26087	0.207355	0.462076
ENSG00000004975.7	DVL2	1176.83	-0.251873	0.229861	-1.09576	0.273184	0.534882
ENSG00000005001.5	PRSS22	0	NA	NA	NA	NA	NA
ENSG00000005007.8	UPF1	4524.61	0.41483	0.176649	2.34833	0.0188578	0.108504
ENSG00000005020.8	SKAP2	1726.67	0.492501	0.221431	2.22417	0.0261368	0.133582
ENSG00000005022.5	SLC25A5	2322.92	-0.30656	0.200156	-1.53161	0.12562	0.343618
ENSG00000005059.11	CCDC109B	424.427	-0.771142	0.246003	-3.13469	0.00172038	0.0230331
ENSG00000005073.5	HOXA11	5.87966	0.280042	0.253172	1.10613	0.268669	NA
ENSG00000005075.11	POLR2J	250.371	0.291975	0.297375	0.98184	0.326179	0.586135
ENSG00000005100.8	DHX33	1049.54	0.229916	0.228002	1.00839	0.313266	0.574125
ENSG00000005102.8	MEOX1	0	NA	NA	NA	NA	NA
ENSG00000005108.11	THSD7A	311.333	0.878165	0.393519	2.23157	0.0256432	0.132041
ENSG00000005156.7	LIG3	2470.28	-0.611119	0.19739	-3.096	0.00196148	0.0248998
ENSG00000005175.5	RPAP3	964.192	0.824388	0.241304	3.41639	0.000634577	0.0113831
ENSG00000005187.7	ACSM3	1876.32	0.445618	0.224732	1.98288	0.0473804	0.192347
ENSG00000005189.15	AC004381.6	1089.49	0.276012	0.196505	1.4046	0.160139	0.398966
ENSG00000005194.10	CIAPIN1	609.444	-0.352865	0.272779	-1.29359	0.195806	0.446671
ENSG00000005206.12	SPPL2B	3612.47	-0.16833	0.216011	-0.779264	0.435824	0.679368
ENSG00000005238.15	FAM214B	636.696	0.233348	0.194827	1.19772	0.231028	0.489992
ENSG00000005243.5	COPZ2	9.98684	0.140933	0.310569	0.453789	0.649981	NA
ENSG00000005249.8	PRKAR2B	577.364	0.175875	0.298019	0.590146	0.555093	0.771079
ENSG00000005302.13	MSL3	720.623	-0.150564	0.273112	-0.551288	0.581436	0.788863
ENSG00000005339.8	CREBBP	10975.5	-0.363032	0.187486	-1.93631	0.0528295	0.205974
ENSG00000005379.11	BZRAP1	2095.05	-0.500057	0.278467	-1.79575	0.0725345	0.247789
ENSG00000005381.6	MPO	1141.47	-0.0414727	0.423538	-0.0979197	0.921996	0.968116
ENSG00000005421.4	PON1	0	NA	NA	NA	NA	NA
ENSG00000005436.9	GCFC2	813.305	-0.025558	0.22569	-0.113244	0.909837	0.963363
ENSG00000005448.12	WDR54	401.153	0.0781947	0.319746	0.244552	0.806803	0.915883
ENSG00000005469.7	CROT	321.768	0.439928	0.337825	1.30224	0.192835	0.442263
ENSG00000005471.11	ABCB4	13.4373	-0.164994	0.27682	-0.596034	0.551152	NA
ENSG00000005483.15	KMT2E	7357.29	-0.330705	0.198476	-1.66622	0.0956699	0.291992
ENSG00000005486.12	RHBDD2	314.865	-0.0952934	0.419467	-0.227177	0.820286	0.922351
ENSG00000005513.9	SOX8	16.4872	-0.119754	0.290443	-0.412316	0.680108	NA
ENSG00000005700.10	IBTK	2143.35	0.428915	0.196577	2.18192	0.0291153	0.142707
ENSG00000005801.12	ZNF195	899.155	-0.366446	0.208864	-1.75447	0.0793495	0.261274
ENSG00000005810.13	MYCBP2	15135.4	0.121829	0.131471	0.926659	0.354104	0.610849
ENSG00000005812.6	FBXL3	2036.69	-0.559564	0.222429	-2.5157	0.0118796	0.081651
ENSG00000005844.13	ITGAL	2849.12	-0.552656	0.249594	-2.21422	0.0268139	0.135627
ENSG00000005882.7	PDK2	818.649	0.693628	0.298695	2.32219	0.0202225	0.113321
ENSG00000005884.13	ITGA3	254.777	0.421347	0.3877	1.08679	0.277131	0.538758
ENSG00000005889.11	ZFX	3546.36	0.0820161	0.148293	0.553067	0.580217	0.787877
ENSG00000005893.11	LAMP2	2748.75	-0.063159	0.182761	-0.345581	0.729657	0.876372
ENSG00000005955.8	GGNBP2	1868.31	-0.476908	0.232954	-2.04722	0.0406364	0.176266
ENSG00000005961.13	ITGA2B	2004.57	0.855855	0.264816	3.23188	0.00122977	0.0181379
ENSG00000005981.8	ASB4	0	NA	NA	NA	NA	NA
ENSG00000006007.7	GDE1	1112.49	-0.441144	0.198559	-2.22173	0.0263015	0.13419
ENSG00000006015.13	C19orf60	514.03	-0.140837	0.307898	-0.457415	0.647373	0.826094
ENSG00000006016.6	CRLF1	19.3403	-0.139572	0.368795	-0.378454	0.705093	NA
ENSG00000006025.7	OSBPL7	761.548	0.0202376	0.23157	0.0873929	0.930359	0.971759
ENSG00000006042.7	TMEM98	682.847	0.213457	0.329012	0.648781	0.51648	0.742203
ENSG00000006047.8	YBX2	12.8137	0.126548	0.277496	0.456035	0.648365	NA
ENSG00000006059.3	KRT33A	0	NA	NA	NA	NA	NA
ENSG00000006062.9	MAP3K14	1147.38	-0.374034	0.229419	-1.63035	0.103027	0.305639
ENSG00000006071.7	ABCC8	0	NA	NA	NA	NA	NA
ENSG00000006074.4	CCL18	0	NA	NA	NA	NA	NA
ENSG00000006075.11	CCL3	2.96028	0.276526	0.252039	1.09716	0.272573	NA
ENSG00000006114.11	SYNRG	2482.74	0.925538	0.232397	3.98257	6.81754e-05	0.00260195
ENSG00000006116.3	CACNG3	0.0484843	-0.0896582	0.215023	-0.41697	0.676701	NA
ENSG00000006118.10	TMEM132A	0	NA	NA	NA	NA	NA
ENSG00000006125.12	AP2B1	8070.6	-0.163629	0.126349	-1.29505	0.195304	0.445699
ENSG00000006128.7	TAC1	0	NA	NA	NA	NA	NA
ENSG00000006194.6	ZNF263	2297.43	-0.030865	0.160169	-0.192702	0.847192	0.936644
ENSG00000006210.6	CX3CL1	3.65402	-0.278056	0.252423	-1.10155	0.270659	NA
ENSG00000006282.15	SPATA20	1215.96	0.107198	0.257955	0.415568	0.677726	0.845683
ENSG00000006283.13	CACNA1G	5.49927	0.0612264	0.253236	0.241776	NA	NA
ENSG00000006327.9	TNFRSF12A	53.4629	-0.620142	0.372187	-1.66621	NA	NA
ENSG00000006377.9	DLX6	0	NA	NA	NA	NA	NA
ENSG00000006432.11	MAP3K9	471.624	-0.697376	0.368076	-1.89465	0.0581386	0.217996
ENSG00000006451.3	RALA	1374.94	0.460613	0.238268	1.93318	0.0532146	0.206789
ENSG00000006453.9	BAIAP2L1	14.1992	0.0787735	0.309931	0.254165	0.799368	NA
ENSG00000006459.6	JHDM1D	605.179	-0.49947	0.304411	-1.64077	0.100844	0.301793
ENSG00000006468.9	ETV1	41.0494	-0.0317807	0.35424	-0.0897151	0.928514	NA
ENSG00000006530.11	AGK	1043.99	0.0481081	0.232183	0.207199	0.835854	0.930278
ENSG00000006534.11	ALDH3B1	708.034	0.76374	0.340156	2.24526	0.0247513	0.128972
ENSG00000006555.6	TTC22	276.248	0.698833	0.416436	1.67813	0.093322	0.2877
ENSG00000006576.12	PHTF2	679.289	-0.604563	0.286214	-2.11228	0.0346627	0.159351
ENSG00000006606.4	CCL26	0	NA	NA	NA	NA	NA
ENSG00000006607.9	FARP2	971.789	0.0940414	0.238635	0.39408	0.693522	0.854902
ENSG00000006611.11	USH1C	0	NA	NA	NA	NA	NA
ENSG00000006625.13	GGCT	531.243	0.816022	0.28049	2.90927	0.00362275	0.0370953
ENSG00000006634.3	DBF4	492.739	-1.50522	0.296043	-5.08446	3.68669e-07	5.70224e-05
ENSG00000006638.7	TBXA2R	111.842	0.517927	0.423832	1.22201	0.221703	NA
ENSG00000006652.9	IFRD1	1426.16	0.348066	0.262808	1.32441	0.185367	0.432682
ENSG00000006659.8	LGALS14	0	NA	NA	NA	NA	NA
ENSG00000006695.6	COX10	517.78	0.301407	0.292903	1.02903	0.303464	0.563541
ENSG00000006704.6	GTF2IRD1	174.947	-0.670329	0.403574	-1.66098	0.0967168	0.29385
ENSG00000006712.10	PAF1	1593.3	-0.133869	0.15122	-0.88526	0.376017	0.629461
ENSG00000006715.11	VPS41	3369.63	0.448267	0.209088	2.14391	0.0320401	0.151806
ENSG00000006740.12	ARHGAP44	151.904	0.809028	0.395998	2.04301	0.0410514	0.177738
ENSG00000006744.14	ELAC2	3478.12	0.162542	0.186184	0.873014	0.382656	0.635113
ENSG00000006747.10	SCIN	29.6726	-0.0494128	0.276643	-0.178616	0.858239	NA
ENSG00000006756.11	ARSD	2865.89	0.557697	0.213633	2.61053	0.0090401	0.0682166
ENSG00000006757.7	PNPLA4	261.096	0.438354	0.333793	1.31325	0.189099	0.437484
ENSG00000006788.8	MYH13	2.40895	-0.275978	0.251732	-1.09632	0.272939	NA
ENSG00000006831.9	ADIPOR2	1636.59	0.460981	0.216088	2.1333	0.0329002	0.154327
ENSG00000006837.7	CDKL3	28.8303	-0.137565	0.335323	-0.410246	0.681626	NA
ENSG00000007001.8	UPP2	0	NA	NA	NA	NA	NA
ENSG00000007038.6	PRSS21	128.558	-0.177798	0.422833	-0.420492	0.674126	0.844118
ENSG00000007047.10	MARK4	1501.04	-0.197346	0.207019	-0.953275	0.340451	0.598474
ENSG00000007062.7	PROM1	7688.25	0.0597149	0.191982	0.311044	0.755767	0.889529
ENSG00000007080.6	CCDC124	472.925	-0.999601	0.209574	-4.76968	1.84516e-06	0.000179255
ENSG00000007129.13	CEACAM21	317.168	0.405776	0.345129	1.17572	0.239706	0.499334
ENSG00000007168.8	PAFAH1B1	3326.36	0.344715	0.184927	1.86406	0.0623133	0.227341
ENSG00000007171.12	NOS2	9.58161	0.0899801	0.283364	0.317542	NA	NA
ENSG00000007174.13	DNAH9	0	NA	NA	NA	NA	NA
ENSG00000007202.10	KIAA0100	10014	-0.0210552	0.120717	-0.174418	0.861537	0.942994
ENSG00000007216.10	SLC13A2	0	NA	NA	NA	NA	NA
ENSG00000007237.14	GAS7	260.322	-0.729128	0.421991	-1.72783	0.0840194	0.269923
ENSG00000007255.6	TRAPPC6A	378.1	-0.643658	0.370046	-1.7394	0.0819646	0.266232
ENSG00000007264.9	MATK	1666.06	-0.113391	0.243141	-0.466357	0.64096	0.822354
ENSG00000007306.10	CEACAM7	0	NA	NA	NA	NA	NA
ENSG00000007312.8	CD79B	417.612	0.662382	0.377531	1.75451	0.0793432	0.261274
ENSG00000007314.7	SCN4A	86.0203	0.16934	0.425894	0.397611	0.690917	NA
ENSG00000007341.14	ST7L	863.573	0.724121	0.255967	2.82896	0.0046699	0.0439852
ENSG00000007350.12	TKTL1	2.8284	-0.276551	0.252022	-1.09733	NA	NA
ENSG00000007372.16	PAX6	8.00776	-0.104005	0.253531	-0.410226	NA	NA
ENSG00000007376.3	RPUSD1	362.866	0.397219	0.319171	1.24454	0.213303	0.469545
ENSG00000007384.11	RHBDF1	377.569	0.258642	0.265452	0.974345	0.329885	0.590075
ENSG00000007392.12	LUC7L	1964.15	-0.584317	0.205003	-2.85028	0.0043681	0.0420189
ENSG00000007402.7	CACNA2D2	130.098	0.744753	0.410334	1.81499	0.0695252	0.241438
ENSG00000007516.9	BAIAP3	76.1673	-1.06222	0.415968	-2.5536	0.0106616	NA
ENSG00000007520.3	TSR3	306.15	-0.35237	0.334296	-1.05407	0.291853	0.553083
ENSG00000007541.10	PIGQ	504.259	-0.125597	0.237167	-0.529574	0.596407	0.797131
ENSG00000007545.11	CRAMP1L	1652.43	-0.41192	0.166486	-2.4742	0.0133536	0.0874981
ENSG00000007866.14	TEAD3	24.8455	-0.472925	0.319521	-1.48011	NA	NA
ENSG00000007908.11	SELE	0	NA	NA	NA	NA	NA
ENSG00000007923.11	DNAJC11	1262.02	0.201301	0.192788	1.04416	0.296411	0.556818
ENSG00000007933.8	FMO3	0	NA	NA	NA	NA	NA
ENSG00000007944.10	MYLIP	1462.33	-0.203883	0.21844	-0.93336	0.350634	0.60837
ENSG00000007952.13	NOX1	0	NA	NA	NA	NA	NA
ENSG00000007968.6	E2F2	159.69	1.00911	0.389299	2.59212	0.00953878	0.0702999
ENSG00000008018.8	PSMB1	990.913	-0.582492	0.249935	-2.33057	0.0197761	0.111583
ENSG00000008056.8	SYN1	15.8878	-0.306325	0.359297	-0.852566	0.3939	NA
ENSG00000008083.9	JARID2	6205.78	-0.52888	0.161078	-3.28337	0.00102575	0.0158862
ENSG00000008086.6	CDKL5	168.195	0.47957	0.412116	1.16368	0.244555	0.504214
ENSG00000008118.5	CAMK1G	0	NA	NA	NA	NA	NA
ENSG00000008128.18	CDK11A	162.379	-1.20439	0.404382	-2.97834	0.00289811	0.0319281
ENSG00000008130.11	NADK	1284.77	0.00831626	0.269609	0.0308456	0.975393	0.988886
ENSG00000008196.8	TFAP2B	0	NA	NA	NA	NA	NA
ENSG00000008197.4	TFAP2D	0	NA	NA	NA	NA	NA
ENSG00000008226.15	DLEC1	24.4026	-0.292013	0.375032	-0.778635	0.436195	NA
ENSG00000008256.11	CYTH3	495.702	-0.354793	0.323442	-1.09693	0.272673	0.534438
ENSG00000008277.10	ADAM22	699.483	0.295862	0.301774	0.980411	0.326883	0.586644
ENSG00000008282.3	SYPL1	2389.54	0.12159	0.200357	0.606865	0.54394	0.763495
ENSG00000008283.11	CYB561	741.319	0.311626	0.251459	1.23927	0.215246	0.472061
ENSG00000008294.16	SPAG9	4331.1	-0.27185	0.195155	-1.393	0.163621	0.404009
ENSG00000008300.10	CELSR3	131.682	-0.973616	0.414184	-2.35068	0.018739	0.108085
ENSG00000008311.10	AASS	1061.08	0.249344	0.274562	0.908152	0.363798	0.618878
ENSG00000008323.11	PLEKHG6	88.9043	-0.466329	0.43024	-1.08388	0.278417	NA
ENSG00000008324.6	SS18L2	139.999	-0.54557	0.417435	-1.30696	0.191227	0.440155
ENSG00000008382.11	MPND	576.971	0.042103	0.274779	0.153225	0.878221	0.950597
ENSG00000008394.8	MGST1	649.187	0.257796	0.314594	0.819456	0.412527	0.662017
ENSG00000008405.7	CRY1	605.381	-1.16194	0.33034	-3.51739	0.00043581	0.00912607
ENSG00000008438.4	PGLYRP1	0	NA	NA	NA	NA	NA
ENSG00000008441.12	NFIX	2752.98	0.135174	0.141316	0.956532	0.338803	0.596917
ENSG00000008513.10	ST3GAL1	6445.21	0.0589791	0.146548	0.402455	0.687349	0.851311
ENSG00000008516.12	MMP25	12.2089	0.0926363	0.301257	0.307499	0.758463	NA
ENSG00000008517.12	IL32	0	NA	NA	NA	NA	NA
ENSG00000008710.13	PKD1	5001.56	-0.0517027	0.164944	-0.313456	0.753934	0.88885
ENSG00000008735.10	MAPK8IP2	27.7427	-0.290024	0.356213	-0.814186	0.415538	NA
ENSG00000008838.13	MED24	3667.7	-0.162972	0.155881	-1.04549	0.295797	0.556234
ENSG00000008853.12	RHOBTB2	654.609	0.00303966	0.289591	0.0104964	0.991625	0.996116
ENSG00000008869.7	HEATR5B	2565.07	0.370714	0.162302	2.2841	0.0223654	0.121319
ENSG00000008952.12	SEC62	3579.11	-0.103714	0.162862	-0.63682	0.524242	0.748417
ENSG00000008988.5	RPS20	14029.7	-0.0682717	0.163562	-0.417405	0.676382	0.84489
ENSG00000009307.11	CSDE1	20203.4	-0.414044	0.166526	-2.48636	0.0129058	0.0856484
ENSG00000009335.13	UBE3C	2827.88	0.318065	0.200132	1.58927	0.111999	0.321477
ENSG00000009413.11	REV3L	2582.87	0.348898	0.182369	1.91315	0.0557292	0.21304
ENSG00000009694.9	TENM1	1.89089	-0.274056	0.251067	-1.09156	0.275026	NA
ENSG00000009709.7	PAX7	0	NA	NA	NA	NA	NA
ENSG00000009724.12	MASP2	25.7411	-0.650406	0.365966	-1.77723	0.0755302	NA
ENSG00000009765.10	IYD	0	NA	NA	NA	NA	NA
ENSG00000009780.11	FAM76A	579.449	-0.404523	0.296344	-1.36504	0.172239	0.414807
ENSG00000009790.10	TRAF3IP3	1550.77	1.16849	0.320474	3.64614	0.000266213	0.00668661
ENSG00000009830.7	POMT2	386.158	0.408382	0.322345	1.26691	0.205188	0.459425
ENSG00000009844.11	VTA1	669.974	0.213209	0.232502	0.91702	0.359132	0.614757
ENSG00000009950.11	MLXIPL	0	NA	NA	NA	NA	NA
ENSG00000009954.6	BAZ1B	6077	0.429053	0.114555	3.74537	0.000180126	0.00521523
ENSG00000010017.9	RANBP9	2572.6	-0.470608	0.178914	-2.63036	0.00852947	0.0654464
ENSG00000010030.9	ETV7	35.6788	0.258199	0.365719	0.706002	0.480187	NA
ENSG00000010072.11	SPRTN	461.812	-0.380155	0.337108	-1.12769	0.259449	0.519993
ENSG00000010165.15	METTL13	1124.38	1.05671	0.286297	3.69095	0.000223418	0.00596588
ENSG00000010219.9	DYRK4	261.284	-0.337998	0.392262	-0.861664	0.388872	0.640672
ENSG00000010244.12	ZNF207	4681.65	-0.603656	0.166972	-3.61532	0.00029998	0.00716721
ENSG00000010256.6	UQCRC1	1166.46	-0.248344	0.211484	-1.17429	0.240279	0.500014
ENSG00000010270.9	STARD3NL	771.285	-0.00764291	0.196226	-0.0389495	0.968931	0.986909
ENSG00000010278.7	CD9	184.966	0.918767	0.428242	2.14544	0.0319177	0.151409
ENSG00000010282.10	HHATL	0	NA	NA	NA	NA	NA
ENSG00000010292.8	NCAPD2	3397.68	0.507703	0.177784	2.85572	0.00429389	0.041466
ENSG00000010295.15	IFFO1	1086.33	0.625279	0.301995	2.0705	0.0384057	0.169785
ENSG00000010310.4	GIPR	17.3189	0.568367	0.367081	1.54834	0.12154	NA
ENSG00000010318.15	PHF7	613.33	-0.103999	0.241458	-0.430714	0.666677	0.838966
ENSG00000010319.2	SEMA3G	10.7815	-0.169408	0.27807	-0.609228	0.542373	NA
ENSG00000010322.11	NISCH	4088.25	-0.213106	0.145405	-1.4656	0.142756	0.372084
ENSG00000010327.6	STAB1	1332.62	-0.164124	0.255127	-0.643303	0.520027	0.745295
ENSG00000010361.9	FUZ	358.032	0.0583941	0.276903	0.210883	0.832979	0.928959
ENSG00000010379.11	SLC6A13	6.71294	0.0854584	0.253401	0.337245	0.735932	NA
ENSG00000010404.13	IDS	6665.7	-0.713451	0.186178	-3.83208	0.000127062	0.00415232
ENSG00000010438.12	PRSS3	9.15316	-0.397003	0.301716	-1.31582	0.188236	NA
ENSG00000010539.7	ZNF200	254.52	1.00751	0.36901	2.73031	0.00632751	0.0537039
ENSG00000010610.5	CD4	1318.84	0.4578	0.259209	1.76614	0.0773724	0.257871
ENSG00000010626.10	LRRC23	476.948	0.0646134	0.27517	0.234812	0.814354	0.919869
ENSG00000010671.11	BTK	2632.66	-0.0983933	0.184786	-0.532472	0.594399	0.796077
ENSG00000010704.14	HFE	2.986	0.277026	0.252188	1.09849	NA	NA
ENSG00000010803.12	SCMH1	1556.87	0.0868279	0.197587	0.439442	0.660341	0.834567
ENSG00000010810.13	FYN	1569.56	0.018053	0.200406	0.0900823	0.928222	0.970724
ENSG00000010818.4	HIVEP2	3249.44	0.590818	0.178353	3.31264	0.000924192	0.0147808
ENSG00000010932.11	FMO1	0	NA	NA	NA	NA	NA
ENSG00000011007.8	TCEB3	1972.34	-0.425091	0.170754	-2.48949	0.0127926	0.0852249
ENSG00000011009.6	LYPLA2	364.024	0.245194	0.320772	0.764387	0.444636	0.686099
ENSG00000011021.17	CLCN6	1254.34	0.0559218	0.21544	0.25957	0.795195	0.909271
ENSG00000011028.9	MRC2	311.375	0.443105	0.343836	1.28871	0.197499	0.448621
ENSG00000011052.17	NME2	0	NA	NA	NA	NA	NA
ENSG00000011083.4	SLC6A7	4.65854	-0.279116	0.252865	-1.10382	NA	NA
ENSG00000011105.7	TSPAN9	41.0966	0.192549	0.370391	0.519853	0.603166	NA
ENSG00000011114.10	BTBD7	1355.84	0.312452	0.144485	2.16252	0.0305782	0.147435
ENSG00000011132.7	APBA3	269.43	0.506391	0.317071	1.59709	0.110246	0.318335
ENSG00000011143.12	MKS1	418.927	0.0519181	0.350135	0.14828	0.882122	0.952369
ENSG00000011198.3	ABHD5	141.618	-0.105695	0.409396	-0.258172	0.796274	0.909817
ENSG00000011201.6	KAL1	261.793	0.493584	0.375494	1.31449	0.188681	0.436992
ENSG00000011243.13	AKAP8L	3106.32	-0.370665	0.182048	-2.03608	0.0417423	0.179387
ENSG00000011258.11	MBTD1	2842.35	0.0438401	0.153111	0.286328	0.774627	0.899023
ENSG00000011260.9	UTP18	1109.3	0.0461265	0.248585	0.185557	0.852792	0.938279
ENSG00000011275.14	RNF216	3504.94	0.0236736	0.142826	0.165751	0.868353	0.945762
ENSG00000011295.11	TTC19	2909.69	-0.0472509	0.175335	-0.269489	0.787553	0.905229
ENSG00000011304.12	PTBP1	5982.8	-0.268897	0.126818	-2.12034	0.0339771	0.157617
ENSG00000011332.15	DPF1	17.61	-0.459593	0.345128	-1.33166	0.182972	NA
ENSG00000011347.5	SYT7	0	NA	NA	NA	NA	NA
ENSG00000011376.5	LARS2	858.475	0.267778	0.284068	0.942654	0.345858	0.603826
ENSG00000011405.9	PIK3C2A	2492.35	-0.218574	0.209975	-1.04095	0.297897	0.558498
ENSG00000011422.7	PLAUR	219.528	0.111058	0.412952	0.268937	0.787978	0.905495
ENSG00000011426.6	ANLN	204.352	0.226841	0.423701	0.53538	0.592387	0.795103
ENSG00000011451.13	WIZ	1764.6	0.00838055	0.175719	0.0476928	0.961961	0.983805
ENSG00000011454.12	RABGAP1	5852.04	1.08414	0.189039	5.73503	9.74926e-09	4.04033e-06
ENSG00000011465.12	DCN	0	NA	NA	NA	NA	NA
ENSG00000011478.7	QPCTL	261.328	-0.848599	0.313738	-2.7048	0.00683457	0.0564585
ENSG00000011485.10	PPP5C	1175.58	0.280657	0.277697	1.01066	0.31218	0.573028
ENSG00000011523.9	CEP68	4779.66	0.0795536	0.166731	0.477137	0.633264	0.817928
ENSG00000011566.10	MAP4K3	943.839	-0.169372	0.245424	-0.690122	0.490118	0.721371
ENSG00000011590.9	ZBTB32	17.1754	0.0986185	0.323737	0.304625	0.760651	NA
ENSG00000011600.7	TYROBP	57.4086	-0.631172	0.429797	-1.46853	0.141959	NA
ENSG00000011638.6	TMEM159	608.594	0.0790408	0.268422	0.294465	0.768403	0.896178
ENSG00000011677.8	GABRA3	51.2913	-1.20359	0.408745	-2.94459	0.0032338	NA
ENSG00000012048.15	BRCA1	566.201	0.409186	0.347705	1.17682	0.239267	0.498737
ENSG00000012061.11	ERCC1	1970.65	-0.312892	0.17349	-1.80351	0.0713079	0.245095
ENSG00000012124.10	CD22	398.143	0.426782	0.386266	1.10489	0.269207	0.530695
ENSG00000012171.13	SEMA3B	23.9355	-0.0428255	0.416548	-0.102811	0.918113	NA
ENSG00000012174.7	MBTPS2	374.376	0.405235	0.356357	1.13716	0.255471	0.51599
ENSG00000012211.8	PRICKLE3	501.291	0.549058	0.271125	2.02511	0.0428559	0.18167
ENSG00000012223.8	LTF	0	NA	NA	NA	NA	NA
ENSG00000012232.4	EXTL3	1111.62	0.336338	0.197212	1.70546	0.0881086	0.277421
ENSG00000012504.9	NR1H4	0	NA	NA	NA	NA	NA
ENSG00000012660.9	ELOVL5	3014.1	-0.625357	0.245167	-2.55074	0.0107494	0.0761656
ENSG00000012779.6	ALOX5	49.4873	-0.0659976	0.412515	-0.159988	0.87289	NA
ENSG00000012817.11	KDM5D	1788.81	-1.48141	0.42995	-3.44554	0.000569911	0.0107189
ENSG00000012822.11	CALCOCO1	3024.51	0.0677665	0.201046	0.33707	0.736064	0.880207
ENSG00000012963.9	UBR7	772.254	0.603191	0.243497	2.4772	0.0132418	0.0870635
ENSG00000012983.7	MAP4K5	1472.04	-0.103145	0.218355	-0.472374	0.63666	0.819888
ENSG00000013016.10	EHD3	896.912	0.229088	0.27741	0.825808	0.408913	0.659456
ENSG00000013275.3	PSMC4	1109.85	-0.402153	0.211721	-1.89945	0.0575059	0.217148
ENSG00000013288.4	MAN2B2	1840.84	0.0238317	0.173159	0.137629	0.890534	0.956124
ENSG00000013293.5	SLC7A14	0	NA	NA	NA	NA	NA
ENSG00000013297.6	CLDN11	2.8888	-0.27661	0.252041	-1.09748	NA	NA
ENSG00000013306.11	SLC25A39	731.192	-0.0318569	0.20752	-0.153512	0.877994	0.95044
ENSG00000013364.14	MVP	1295.75	0.0814203	0.213996	0.380476	0.703592	0.861751
ENSG00000013374.11	NUB1	2359.89	-0.272207	0.156423	-1.7402	0.081824	0.265996
ENSG00000013375.11	PGM3	387.267	-0.0203266	0.297531	-0.0683176	0.945533	0.977808
ENSG00000013392.6	RWDD2A	89.8872	-0.156982	0.418419	-0.375179	0.707528	NA
ENSG00000013441.11	CLK1	6316.05	-0.288939	0.205075	-1.40894	0.158852	0.397298
ENSG00000013503.5	POLR3B	303.877	0.216109	0.404768	0.533909	0.593405	0.79543
ENSG00000013523.5	ANGEL1	1920.2	0.23813	0.219995	1.08244	0.279059	0.540118
ENSG00000013561.13	RNF14	722.521	0.536694	0.250212	2.14496	0.0319564	0.151532
ENSG00000013563.9	DNASE1L1	674.873	-0.0677603	0.25755	-0.263096	0.792477	0.908087
ENSG00000013573.12	DDX11	1156.34	0.48658	0.288726	1.68526	0.0919378	0.285066
ENSG00000013583.4	HEBP1	1153.41	0.065801	0.236898	0.277761	0.781196	0.902502
ENSG00000013588.5	GPRC5A	0	NA	NA	NA	NA	NA
ENSG00000013619.9	MAMLD1	18.4138	0.0360774	0.344179	0.104822	0.916517	NA
ENSG00000013725.10	CD6	88.9383	0.154889	0.399173	0.388025	0.697997	NA
ENSG00000013810.14	TACC3	2948.37	-0.0740072	0.167704	-0.441297	0.658998	0.833945
ENSG00000014123.9	UFL1	1811.82	0.00865556	0.241862	0.0357873	0.971452	0.987621
ENSG00000014138.4	POLA2	791.427	0.417663	0.247901	1.6848	0.0920269	0.285066
ENSG00000014164.6	ZC3H3	805.038	-0.301521	0.223377	-1.34983	0.17707	0.422101
ENSG00000014216.11	CAPN1	4014.1	0.0712335	0.158825	0.448502	0.653791	0.830934
ENSG00000014257.11	ACPP	2.9516	-0.276747	0.252086	-1.09783	NA	NA
ENSG00000014641.13	MDH1	887.937	-0.0191919	0.244166	-0.0786019	0.937349	0.974137
ENSG00000014824.9	SLC30A9	1602.8	0.0324905	0.176622	0.183955	0.854049	0.938794
ENSG00000014914.15	MTMR11	21.5958	0.360998	0.31399	1.14971	0.250263	NA
ENSG00000014919.8	COX15	1186.01	0.591498	0.240387	2.46061	0.0138701	0.089732
ENSG00000015133.14	CCDC88C	5258.2	0.110275	0.200665	0.549548	0.582629	0.789269
ENSG00000015153.10	YAF2	951.55	-0.533756	0.302466	-1.76468	0.0776173	0.25852
ENSG00000015171.14	ZMYND11	2444.82	0.712427	0.235303	3.0277	0.00246422	0.0288803
ENSG00000015285.6	WAS	1372.45	-0.0730805	0.156913	-0.465739	0.641402	0.82266
ENSG00000015413.5	DPEP1	0	NA	NA	NA	NA	NA
ENSG00000015475.14	BID	730.716	-0.113989	0.257068	-0.443419	0.657463	0.833591
ENSG00000015479.13	MATR3	16322.6	-0.442575	0.166098	-2.66454	0.00770944	0.0612639
ENSG00000015520.10	NPC1L1	16.0223	-0.00374594	0.253883	-0.0147546	NA	NA
ENSG00000015532.5	XYLT2	1001.41	0.766074	0.306136	2.5024	0.0123356	0.0832402
ENSG00000015568.8	RGPD5	11.6573	-0.143276	0.340653	-0.420594	0.674052	NA
ENSG00000015592.12	STMN4	0	NA	NA	NA	NA	NA
ENSG00000015676.13	NUDCD3	3679.61	0.291551	0.179473	1.62448	0.104273	0.307509
ENSG00000016082.10	ISL1	0	NA	NA	NA	NA	NA
ENSG00000016391.6	CHDH	6.77988	0.280366	0.253282	1.10693	NA	NA
ENSG00000016402.8	IL20RA	0	NA	NA	NA	NA	NA
ENSG00000016490.11	CLCA1	0	NA	NA	NA	NA	NA
ENSG00000016602.8	CLCA4	3.97925	-0.115892	0.252816	-0.458406	NA	NA
ENSG00000016864.12	GLT8D1	311.386	0.710743	0.315036	2.25607	0.0240664	0.126975
ENSG00000017260.15	ATP2C1	6267.91	0.11	0.136201	0.807628	0.419305	0.666612
ENSG00000017373.11	SRCIN1	9.69827	-0.096102	0.327912	-0.293073	0.769466	NA
ENSG00000017427.11	IGF1	1.344	-0.270014	0.249602	-1.08177	0.279353	NA
ENSG00000017483.10	SLC38A5	412.841	0.526549	0.339794	1.54961	0.121234	0.337623
ENSG00000017621.11	MAGIX	17.8403	0.325564	0.406412	0.801069	0.423092	NA
ENSG00000017797.7	RALBP1	4425.89	0.373344	0.135949	2.7462	0.00602901	0.0518822
ENSG00000018189.8	RUFY3	874.426	-0.109146	0.258687	-0.421921	0.673082	0.843326
ENSG00000018236.10	CNTN1	561.577	0.582704	0.384251	1.51647	0.129401	0.350406
ENSG00000018280.12	SLC11A1	44.6827	-0.200525	0.358585	-0.559211	0.576018	NA
ENSG00000018408.10	WWTR1	210.732	0.262362	0.408836	0.641728	0.52105	0.745852
ENSG00000018510.8	AGPS	2373.23	0.0479368	0.255313	0.187757	0.851067	0.937323
ENSG00000018607.5	ZNF806	3.13519	0.277423	0.252325	1.09947	NA	NA
ENSG00000018610.9	CXorf56	501.962	-0.129466	0.245647	-0.527039	0.598166	0.798562
ENSG00000018625.10	ATP1A2	0.18963	-0.211118	0.227239	-0.929055	0.35286	NA
ENSG00000018699.7	TTC27	1275.68	0.542612	0.260916	2.07964	0.0375584	0.167743
ENSG00000018869.12	ZNF582	151.769	0.458334	0.395423	1.1591	0.246416	0.506136
ENSG00000019102.7	VSIG2	10.8238	0.334131	0.271237	1.23188	0.217995	NA
ENSG00000019144.12	PHLDB1	940.965	0.0473101	0.238791	0.198124	0.842948	0.934798
ENSG00000019169.9	MARCO	0	NA	NA	NA	NA	NA
ENSG00000019186.5	CYP24A1	0	NA	NA	NA	NA	NA
ENSG00000019485.8	PRDM11	1326.87	0.783588	0.253004	3.09713	0.00195404	0.0248322
ENSG00000019505.3	SYT13	2.74521	-0.276357	0.251958	-1.09684	NA	NA
ENSG00000019549.4	SNAI2	0	NA	NA	NA	NA	NA
ENSG00000019582.10	CD74	49069.1	-0.225483	0.140237	-1.60788	0.107862	0.313842
ENSG00000019991.11	HGF	77.2129	0.289519	0.423438	0.683733	0.494144	NA
ENSG00000019995.6	ZRANB1	2281.1	-0.362914	0.237139	-1.53038	0.125922	0.344135
ENSG00000020129.11	NCDN	810.897	0.352713	0.337878	1.04391	0.296528	0.556818
ENSG00000020181.13	GPR124	84.4017	-0.178572	0.420928	-0.424233	0.671396	NA
ENSG00000020219.8	CCT8L1P	3.10607	0.0448037	0.252497	0.177442	NA	NA
ENSG00000020256.15	ZFP64	766.519	0.85378	0.284125	3.00494	0.00265632	0.0304048
ENSG00000020426.6	MNAT1	307.214	0.590352	0.320433	1.84236	0.0654228	0.234052
ENSG00000020577.9	SAMD4A	559.712	-0.145911	0.266596	-0.547311	0.584165	0.790203
ENSG00000020633.14	RUNX3	2848.61	-0.786005	0.281807	-2.78916	0.00528443	0.0475275
ENSG00000020922.8	MRE11A	1764.6	-0.00507331	0.175398	-0.0289246	0.976925	0.989467
ENSG00000021300.9	PLEKHB1	231.79	0.177136	0.39593	0.447391	0.654593	0.831414
ENSG00000021355.8	SERPINB1	11548.1	0.224962	0.115805	1.94259	0.0520655	0.203618
ENSG00000021461.12	CYP3A43	0.110918	-0.18781	0.220942	-0.85004	0.395303	NA
ENSG00000021488.8	SLC7A9	3.56762	0.133272	0.252595	0.527613	NA	NA
ENSG00000021574.7	SPAST	1047.78	0.295824	0.247419	1.19564	0.231838	0.490285
ENSG00000021645.13	NRXN3	26.7451	0.0676314	0.29165	0.231893	0.816621	NA
ENSG00000021762.15	OSBPL5	677.527	0.291474	0.284513	1.02446	0.305616	0.566151
ENSG00000021776.6	AQR	2315.49	0.125613	0.19264	0.65206	0.514362	0.740597
ENSG00000021826.10	CPS1	95.1135	0.262498	0.415153	0.632293	0.527196	NA
ENSG00000021852.8	C8B	0	NA	NA	NA	NA	NA
ENSG00000022267.12	FHL1	2614.68	-0.61855	0.157488	-3.92759	8.58007e-05	0.00313226
ENSG00000022277.8	RTFDC1	2499.1	-0.204407	0.209667	-0.974913	0.329604	0.589739
ENSG00000022355.10	GABRA1	0	NA	NA	NA	NA	NA
ENSG00000022556.11	NLRP2	572.69	0.34248	0.427299	0.8015	0.422842	0.669519
ENSG00000022567.5	SLC45A4	380.2	-0.0990381	0.386061	-0.256535	0.797538	0.910288
ENSG00000022840.11	RNF10	6108.86	-0.998924	0.227733	-4.38639	1.15247e-05	0.00071658
ENSG00000022976.11	ZNF839	662.387	-0.165234	0.279608	-0.590946	0.554556	0.770727
ENSG00000023041.7	ZDHHC6	867.249	-0.00644087	0.235804	-0.0273145	0.978209	0.990255
ENSG00000023171.10	GRAMD1B	1176.1	0.0697886	0.213977	0.32615	0.744311	0.884478
ENSG00000023191.12	RNH1	1430.13	-0.204244	0.203246	-1.00491	0.314939	0.575486
ENSG00000023228.9	NDUFS1	2183.11	0.179981	0.182165	0.988011	0.323147	0.583977
ENSG00000023287.8	RB1CC1	3283.63	-1.02897	0.279663	-3.67931	0.000233869	0.00613358
ENSG00000023318.7	ERP44	1136.74	-0.0244843	0.200986	-0.121821	0.903041	0.961529
ENSG00000023330.10	ALAS1	701.209	0.346598	0.287801	1.20429	0.228476	0.48796
ENSG00000023445.9	BIRC3	1752.94	0.0796704	0.265192	0.300425	0.763853	0.893408
ENSG00000023516.7	AKAP11	4327.66	0.218403	0.163461	1.33611	0.181512	0.426852
ENSG00000023572.4	GLRX2	62.8617	0.122964	0.389385	0.31579	0.752162	NA
ENSG00000023608.4	SNAPC1	380.878	-0.886505	0.302584	-2.92978	0.00339206	0.0355004
ENSG00000023697.8	DERA	385.596	-0.10925	0.349565	-0.312532	0.754636	0.889144
ENSG00000023734.6	STRAP	2151.1	-0.803278	0.2138	-3.75715	0.000171861	0.00503798
ENSG00000023839.6	ABCC2	25.0039	0.134327	0.405188	0.331517	0.740254	NA
ENSG00000023892.9	DEF6	4449.36	0.170909	0.131631	1.2984	0.19415	0.444102
ENSG00000023902.9	PLEKHO1	2653.04	-1.10629	0.285667	-3.87265	0.000107657	0.00368953
ENSG00000023909.5	GCLM	450.197	0.14018	0.256621	0.546254	0.584891	0.790821
ENSG00000024048.6	UBR2	3844.71	0.770042	0.188929	4.07584	4.58491e-05	0.00188446
ENSG00000024422.7	EHD2	2567.97	0.360816	0.259569	1.39006	0.16451	0.404322
ENSG00000024526.12	DEPDC1	71.6116	-0.0198996	0.388396	-0.0512355	0.959138	NA
ENSG00000024862.12	CCDC28A	430.104	-0.312094	0.277091	-1.12632	0.260028	0.52081
ENSG00000025039.10	RRAGD	1344.49	0.129259	0.158926	0.813332	0.416028	0.664744
ENSG00000025156.8	HSF2	828.442	-0.442067	0.279004	-1.58445	0.113092	0.323611
ENSG00000025293.11	PHF20	2667.2	-0.428753	0.13728	-3.1232	0.00178899	0.0236022
ENSG00000025423.7	HSD17B6	19.4514	0.0366252	0.308821	0.118597	0.905595	NA
ENSG00000025434.14	NR1H3	999.847	0.405664	0.276875	1.46515	0.142879	0.372238
ENSG00000025708.8	TYMP	66.8865	0.428527	0.424218	1.01016	0.312421	NA
ENSG00000025770.14	NCAPH2	988.383	-0.412586	0.200279	-2.06006	0.0393929	0.172335
ENSG00000025772.7	TOMM34	714.453	-0.291992	0.198714	-1.46941	0.141723	0.370211
ENSG00000025796.9	SEC63	3069.47	-0.2905	0.205668	-1.41247	0.157811	0.396382
ENSG00000025800.9	KPNA6	2748.51	-0.36655	0.17597	-2.08302	0.0372489	0.166677
ENSG00000026025.9	VIM	39058.1	-1.08341	0.189035	-5.73128	9.96763e-09	4.04033e-06
ENSG00000026036.16	RTEL1-TNFRSF6B	89.8718	0.324778	0.430097	0.755127	0.450173	NA
ENSG00000026103.15	FAS	110.486	0.148594	0.422538	0.351669	0.725086	NA
ENSG00000026297.11	RNASET2	882.845	-0.489182	0.336593	-1.45333	0.146131	0.37778
ENSG00000026508.12	CD44	22351.8	-0.170667	0.158257	-1.07842	0.280848	0.542007
ENSG00000026559.9	KCNG1	0	NA	NA	NA	NA	NA
ENSG00000026652.9	AGPAT4	846.088	0.559879	0.23947	2.33799	0.0193879	0.110499
ENSG00000026751.12	SLAMF7	0.0917593	-0.026558	0.217825	-0.121924	0.902959	NA
ENSG00000026950.12	BTN3A1	1747.83	0.451509	0.213408	2.11571	0.0343695	0.158597
ENSG00000027001.7	MIPEP	243.333	0.226232	0.307749	0.735118	0.462268	0.701427
ENSG00000027075.9	PRKCH	3100.17	-0.671278	0.212968	-3.15201	0.00162148	0.0219591
ENSG00000027644.4	INSRR	0	NA	NA	NA	NA	NA
ENSG00000027697.8	IFNGR1	644.419	0.0597156	0.3103	0.192445	0.847394	0.936644
ENSG00000027847.9	B4GALT7	496.853	-0.339895	0.247159	-1.3752	0.169068	0.410515
ENSG00000027869.7	SH2D2A	62.7378	-0.344389	0.386711	-0.890559	0.373166	NA
ENSG00000028116.12	VRK2	866.455	-0.124243	0.255282	-0.486688	0.626479	0.814361
ENSG00000028137.12	TNFRSF1B	565.371	-0.612082	0.288247	-2.12346	0.0337152	0.1568
ENSG00000028203.13	VEZT	2167.35	-0.445037	0.222642	-1.9989	0.0456197	0.188512
ENSG00000028277.16	POU2F2	1001.51	0.0457885	0.241275	0.189777	0.849484	0.936809
ENSG00000028310.13	BRD9	2233.03	-0.640353	0.187041	-3.42359	0.000617998	0.0112107
ENSG00000028528.10	SNX1	2717.89	0.169591	0.138663	1.22305	0.221311	0.479452
ENSG00000028839.5	TBPL1	304.436	-0.122442	0.286944	-0.426709	0.669592	0.840973
ENSG00000029153.10	ARNTL2	352.736	-0.434087	0.328462	-1.32157	0.18631	0.433678
ENSG00000029363.11	BCLAF1	11227.3	-0.830911	0.196681	-4.22466	2.39298e-05	0.00120727
ENSG00000029364.7	SLC39A9	1738.29	-0.0641454	0.19927	-0.321902	0.747527	0.885846
ENSG00000029534.15	ANK1	99.8951	-0.101592	0.421546	-0.240998	0.809557	NA
ENSG00000029559.5	IBSP	0	NA	NA	NA	NA	NA
ENSG00000029639.6	TFB1M	263.111	0.863126	0.353355	2.44266	0.0145796	0.0925414
ENSG00000029725.12	RABEP1	2815.99	0.565876	0.153689	3.68195	0.000231459	0.00611416
ENSG00000029993.10	HMGB3	817.345	-0.761695	0.282132	-2.69978	0.00693848	0.0570363
ENSG00000030066.9	NUP160	1849.67	0.449048	0.187411	2.39605	0.0165727	0.100418
ENSG00000030110.8	BAK1	356.655	0.197186	0.32831	0.60061	0.5481	0.765616
ENSG00000030304.8	MUSK	0	NA	NA	NA	NA	NA
ENSG00000030419.12	IKZF2	1532.95	0.469405	0.287191	1.63447	0.10216	0.304253
ENSG00000030582.12	GRN	1822.97	0.257504	0.201395	1.2786	0.201038	0.453589
ENSG00000031003.6	FAM13B	3621.8	-0.366611	0.182636	-2.00733	0.0447143	0.186587
ENSG00000031081.6	ARHGAP31	908.829	0.392321	0.274898	1.42715	0.153536	0.389708
ENSG00000031544.10	NR2E3	1.64461	0.272374	0.250659	1.08663	NA	NA
ENSG00000031691.6	CENPQ	115.765	0.454728	0.430229	1.05694	0.290537	0.552006
ENSG00000031698.8	SARS	1038.39	0.82332	0.243967	3.37472	0.000738895	0.0125698
ENSG00000031823.10	RANBP3	2563.98	-0.27612	0.172318	-1.60238	0.109071	0.315874
ENSG00000032219.14	ARID4A	2955.74	-0.468787	0.255359	-1.83579	0.0663885	0.236086
ENSG00000032389.8	TSSC1	590.083	0.744738	0.326695	2.27961	0.0226305	0.122028
ENSG00000032444.11	PNPLA6	2021.98	0.0456552	0.167569	0.272457	0.785271	0.904504
ENSG00000032742.13	IFT88	574.586	-0.11625	0.237193	-0.490106	0.624059	0.813103
ENSG00000033011.7	ALG1	324.411	0.341307	0.38915	0.877058	0.380455	0.633608
ENSG00000033030.9	ZCCHC8	1178.41	-0.482021	0.242873	-1.98466	0.0471819	0.192111
ENSG00000033050.3	ABCF2	1333.06	0.493565	0.184165	2.68002	0.00736183	0.0595994
ENSG00000033100.10	CHPF2	2906.82	-0.39218	0.178724	-2.19433	0.0282116	0.140401
ENSG00000033122.14	LRRC7	9.38695	0.133046	0.255299	0.521139	NA	NA
ENSG00000033170.12	FUT8	1368.69	0.787787	0.212962	3.69919	0.000216289	0.00584478
ENSG00000033178.8	UBA6	2060.18	-0.306473	0.208943	-1.46677	0.142437	0.3715
ENSG00000033327.8	GAB2	5746.83	-0.702639	0.262809	-2.67357	0.00750488	0.0600544
ENSG00000033627.10	ATP6V0A1	2127.87	0.060304	0.232571	0.259293	0.795409	0.909271
ENSG00000033800.9	PIAS1	2062.29	-0.327174	0.199823	-1.63732	0.101564	0.303248
ENSG00000033867.12	SLC4A7	803.445	-0.0812148	0.288995	-0.281024	0.778692	0.901301
ENSG00000034053.10	APBA2	26.6873	0.545407	0.352856	1.54569	0.122179	NA
ENSG00000034063.9	UHRF1	1025.64	0.263031	0.343349	0.766074	0.443632	0.685475
ENSG00000034152.14	MAP2K3	1286.15	-0.833952	0.223216	-3.73607	0.000186915	0.00532276
ENSG00000034239.6	EFCAB1	5.58239	0.280042	0.253144	1.10625	NA	NA
ENSG00000034510.4	TMSB10	2688.95	-0.155779	0.196419	-0.793097	0.427721	0.673345
ENSG00000034533.7	ASTE1	309.992	0.488107	0.325652	1.49886	0.13391	0.357366
ENSG00000034677.7	RNF19A	2176.96	-0.873447	0.252474	-3.45955	0.000541076	0.0103657
ENSG00000034693.10	PEX3	382.002	0.582716	0.310858	1.87454	0.0608561	0.223957
ENSG00000034713.3	GABARAPL2	1674.7	0.349823	0.202249	1.72966	0.0836905	0.269234
ENSG00000034971.10	MYOC	143.687	0.0733968	0.254168	0.288773	0.772755	0.898204
ENSG00000035115.17	SH3YL1	832.423	0.317701	0.287035	1.10684	0.268363	0.52992
ENSG00000035141.3	FAM136A	871.087	-0.338923	0.226116	-1.49889	0.133902	0.357366
ENSG00000035403.12	VCL	3441.31	0.0513146	0.222094	0.231049	0.817277	0.9211
ENSG00000035499.8	DEPDC1B	184.992	0.0908118	0.36548	0.248473	0.803769	0.913582
ENSG00000035664.7	DAPK2	17.4699	0.0909504	0.289968	0.313657	0.753782	NA
ENSG00000035681.3	NSMAF	2587.18	0.0508304	0.156553	0.324684	0.74542	0.885092
ENSG00000035687.9	ADSS	1172.62	0.323536	0.195508	1.65485	0.0979558	0.296008
ENSG00000035720.3	STAP1	405.384	-0.380741	0.420226	-0.90604	0.364915	0.61988
ENSG00000035862.8	TIMP2	2795.25	0.605962	0.201591	3.0059	0.00264794	0.0303673
ENSG00000035928.10	RFC1	2617.56	-0.324458	0.199351	-1.62757	0.103617	0.306265
ENSG00000036054.8	TBC1D23	946.909	-0.286585	0.20517	-1.39681	0.162469	0.402662
ENSG00000036257.8	CUL3	2910.76	-0.322328	0.177565	-1.81527	0.0694823	0.241399
ENSG00000036448.5	MYOM2	111.227	0.265455	0.430191	0.617063	0.537193	NA
ENSG00000036473.6	OTC	0	NA	NA	NA	NA	NA
ENSG00000036530.4	CYP46A1	14.604	-0.0868293	0.262514	-0.330761	NA	NA
ENSG00000036549.8	ZZZ3	3609.62	0.47605	0.144049	3.30478	0.000950516	0.0150584
ENSG00000036565.10	SLC18A1	0	NA	NA	NA	NA	NA
ENSG00000036672.11	USP2	59.0947	0.411368	0.425439	0.966928	0.33358	NA
ENSG00000036828.9	CASR	0	NA	NA	NA	NA	NA
ENSG00000037042.8	TUBG2	293.219	0.470651	0.353137	1.33277	0.182607	0.428622
ENSG00000037241.3	RPL26L1	235.09	-0.178618	0.310789	-0.574724	0.565478	0.776632
ENSG00000037280.11	FLT4	32.4409	0.0638165	0.357612	0.178452	0.858368	NA
ENSG00000037474.10	NSUN2	1867.62	-0.032887	0.239201	-0.137487	0.890646	0.956124
ENSG00000037637.6	FBXO42	1097.31	-0.367698	0.251061	-1.46458	0.143036	0.3724
ENSG00000037749.7	MFAP3	898.737	0.301232	0.240463	1.25271	0.21031	0.466363
ENSG00000037757.9	MRI1	528.49	0.248709	0.285312	0.87171	0.383367	0.63561
ENSG00000037897.12	METTL1	349.236	-0.11505	0.285572	-0.402877	0.687039	0.851106
ENSG00000037965.4	HOXC8	0	NA	NA	NA	NA	NA
ENSG00000038002.4	AGA	384.307	-0.511396	0.264226	-1.93545	0.0529351	0.20616
ENSG00000038210.9	PI4K2B	538.063	0.447995	0.317657	1.41031	0.158448	0.397134
ENSG00000038219.8	BOD1L1	8599.06	-0.2937	0.158299	-1.85535	0.0635468	0.229915
ENSG00000038274.12	MAT2B	2161.61	0.797674	0.252102	3.16409	0.00155571	0.0213139
ENSG00000038295.3	TLL1	0	NA	NA	NA	NA	NA
ENSG00000038358.10	EDC4	3101.16	-0.409958	0.155498	-2.63642	0.00837854	0.064745
ENSG00000038382.13	TRIO	5850.67	-0.159083	0.105509	-1.50776	0.131615	0.35419
ENSG00000038427.11	VCAN	5.42724	-0.0396166	0.25322	-0.156452	0.875677	NA
ENSG00000038532.10	CLEC16A	2125.7	-0.0511654	0.174546	-0.293134	0.769419	0.896563
ENSG00000038945.10	MSR1	1.60864	0.271979	0.250512	1.08569	NA	NA
ENSG00000039068.14	CDH1	96.1943	-0.136756	0.419975	-0.32563	0.744704	NA
ENSG00000039123.11	SKIV2L2	2213.16	0.173658	0.175319	0.990528	0.321916	0.58325
ENSG00000039139.9	DNAH5	19.8182	0.229654	0.315586	0.727705	0.466794	NA
ENSG00000039319.12	ZFYVE16	589.761	0.146482	0.259369	0.564762	0.572235	0.781707
ENSG00000039523.13	FAM65A	1910.4	0.28658	0.197352	1.45212	0.146467	0.378317
ENSG00000039537.9	C6	0	NA	NA	NA	NA	NA
ENSG00000039560.9	RAI14	152.182	-0.0374428	0.412531	-0.0907637	0.92768	0.97052
ENSG00000039600.6	SOX30	9.98248	0.156837	0.292023	0.537071	0.591219	NA
ENSG00000039650.5	PNKP	1267.62	-0.0627104	0.190986	-0.32835	0.742647	0.883585
ENSG00000039987.2	BEST2	0	NA	NA	NA	NA	NA
ENSG00000040199.14	PHLPP2	576.861	-0.699146	0.253699	-2.75581	0.00585468	0.0507536
ENSG00000040275.12	SPDL1	379.589	0.406811	0.240363	1.69248	0.090554	0.282126
ENSG00000040341.13	STAU2	435.032	0.331002	0.388548	0.851894	0.394273	0.645768
ENSG00000040487.8	PQLC2	224.543	0.191667	0.308701	0.620883	0.534677	0.755424
ENSG00000040531.10	CTNS	296.447	1.02368	0.303669	3.37102	0.000748895	0.0126666
ENSG00000040608.9	RTN4R	55.4202	0.270547	0.425119	0.636403	0.524514	NA
ENSG00000040633.8	PHF23	892.411	0.592466	0.271034	2.18595	0.0288196	0.142134
ENSG00000040731.6	CDH10	0	NA	NA	NA	NA	NA
ENSG00000040933.11	INPP4A	2562.24	0.213694	0.212036	1.00782	0.31354	0.574155
ENSG00000041353.5	RAB27B	1441.35	0.446766	0.31222	1.43093	0.152449	0.388062
ENSG00000041357.11	PSMA4	1713.43	0.121205	0.199441	0.607725	0.54337	0.763211
ENSG00000041515.11	MYO16	0	NA	NA	NA	NA	NA
ENSG00000041802.6	LSG1	1991.48	-0.331059	0.21424	-1.54527	0.12228	0.338451
ENSG00000041880.10	PARP3	570.268	0.0950786	0.252711	0.376234	0.706743	0.862965
ENSG00000041982.10	TNC	1.86877	0.217779	0.25102	0.867578	0.385625	NA
ENSG00000041988.11	THAP3	284.158	0.550513	0.309149	1.78074	0.0749553	0.252415
ENSG00000042062.7	FAM65C	1902.34	0.682469	0.223265	3.05676	0.00223741	0.0271142
ENSG00000042088.9	TDP1	947.178	0.334854	0.240736	1.39096	0.164237	0.404249
ENSG00000042286.10	AIFM2	160.615	0.196346	0.412573	0.475907	0.634141	0.818347
ENSG00000042304.6	C2orf83	0	NA	NA	NA	NA	NA
ENSG00000042317.12	SPATA7	299.265	0.430969	0.289174	1.49034	0.136134	0.361287
ENSG00000042429.6	MED17	1994.51	-0.465538	0.241865	-1.92479	0.0542558	0.209107
ENSG00000042445.9	RETSAT	426.96	0.274247	0.257105	1.06667	0.286121	0.547776
ENSG00000042493.11	CAPG	1147.25	0.213889	0.20594	1.0386	0.298992	0.559301
ENSG00000042753.7	AP2S1	332.167	-0.101047	0.320081	-0.315691	0.752237	0.888043
ENSG00000042781.8	USH2A	0	NA	NA	NA	NA	NA
ENSG00000042813.3	ZPBP	0.902994	-0.264319	0.247629	-1.0674	0.285792	NA
ENSG00000042832.7	TG	12.8555	0.00676812	0.287493	0.0235418	NA	NA
ENSG00000042980.8	ADAM28	4058.33	-0.163271	0.185014	-0.882478	0.377518	0.630797
ENSG00000043039.5	BARX2	0	NA	NA	NA	NA	NA
ENSG00000043093.9	DCUN1D1	1098.81	-0.376239	0.295246	-1.27432	0.20255	0.455758
ENSG00000043143.16	PHF15	5126.05	0.458349	0.233538	1.96263	0.0496893	0.197932
ENSG00000043355.6	ZIC2	0.0624863	-0.138436	0.216871	-0.638332	0.523258	NA
ENSG00000043462.7	LCP2	7923.01	0.463591	0.133514	3.47223	0.000516146	0.010129
ENSG00000043514.11	TRIT1	402.226	-0.0463805	0.267253	-0.173545	0.862223	0.943241
ENSG00000043591.4	ADRB1	3.89252	0.190862	0.252787	0.755029	NA	NA
ENSG00000044012.3	GUCA2B	0	NA	NA	NA	NA	NA
ENSG00000044090.4	CUL7	1977.96	0.383073	0.200984	1.90599	0.0566514	0.215419
ENSG00000044115.16	CTNNA1	5396.91	0.0575943	0.129538	0.444613	0.656599	0.833152
ENSG00000044446.7	PHKA2	2091.02	-0.154974	0.162514	-0.953607	0.340283	0.598268
ENSG00000044459.10	CNTLN	1208.97	0.197269	0.231032	0.853862	0.393182	0.644699
ENSG00000044524.6	EPHA3	0.482123	-0.246923	0.241544	-1.02227	0.306653	NA
ENSG00000044574.7	HSPA5	10717.8	-0.596546	0.336252	-1.7741	0.076046	0.254388
ENSG00000046604.8	DSG2	3511.06	0.220583	0.183567	1.20165	0.229498	0.488616
ENSG00000046647.9	GEMIN8	297.088	0.197773	0.301334	0.656325	0.511615	0.738916
ENSG00000046651.10	OFD1	2339.49	0.0601016	0.163096	0.368504	0.712498	0.866123
ENSG00000046653.10	GPM6B	8.5208	0.00274835	0.253592	0.0108377	0.991353	NA
ENSG00000046774.9	MAGEC2	0	NA	NA	NA	NA	NA
ENSG00000046889.14	PREX2	6586.89	0.236033	0.200147	1.1793	0.23828	0.498016
ENSG00000047056.10	WDR37	1572.82	-0.254235	0.249512	-1.01893	0.308237	0.568989
ENSG00000047188.11	YTHDC2	1222.87	-0.139346	0.216631	-0.643238	0.52007	0.745295
ENSG00000047230.10	CTPS2	1017.68	0.527088	0.174292	3.02417	0.00249316	0.0291613
ENSG00000047249.12	ATP6V1H	743.739	-0.503569	0.261055	-1.92898	0.053734	0.207846
ENSG00000047315.10	POLR2B	3810.21	0.0824488	0.135907	0.606654	0.544081	0.763571
ENSG00000047346.8	FAM214A	1514.64	-0.426685	0.256043	-1.66646	0.0956218	0.291957
ENSG00000047365.7	ARAP2	2614.54	0.0553309	0.165435	0.334456	0.738035	0.880772
ENSG00000047410.9	TPR	9444.25	0.103077	0.107783	0.956343	0.338899	0.596997
ENSG00000047457.9	CP	1.27199	0.269224	0.249583	1.0787	NA	NA
ENSG00000047578.8	KIAA0556	1281.56	0.154029	0.1939	0.794374	0.426978	0.672647
ENSG00000047579.15	DTNBP1	680.572	-0.361844	0.274438	-1.31849	0.187339	0.435027
ENSG00000047597.5	XK	52.0582	0.280103	0.373395	0.750151	0.453164	NA
ENSG00000047617.10	ANO2	50.5417	0.266797	0.396321	0.673185	0.50083	NA
ENSG00000047621.7	C12orf4	346.024	0.132941	0.310864	0.427649	0.668907	0.840513
ENSG00000047634.10	SCML1	27.5948	-0.0172967	0.344638	-0.0501879	0.959973	NA
ENSG00000047644.13	WWC3	1400.64	0.0247276	0.220685	0.112049	0.910784	0.963921
ENSG00000047648.17	ARHGAP6	339.317	1.19722	0.316687	3.78044	0.000156549	0.00470647
ENSG00000047662.4	FAM184B	35.7615	0.00829087	0.356318	0.0232682	0.981436	NA
ENSG00000047849.17	MAP4	3502.36	-0.18329	0.165425	-1.10799	0.267864	0.52935
ENSG00000047932.9	GOPC	1613.09	0.584498	0.203348	2.87437	0.00404833	0.0399225
ENSG00000047936.6	ROS1	0.0624863	-0.138436	0.216871	-0.638332	0.523258	NA
ENSG00000048028.7	USP28	335.239	0.209305	0.398843	0.524782	0.599735	0.799222
ENSG00000048052.17	HDAC9	885.679	0.0842567	0.223296	0.377333	0.705927	0.862703
ENSG00000048140.13	TSPAN17	588.591	-0.326421	0.282515	-1.15541	0.247922	0.507615
ENSG00000048162.15	NOP16	292.004	-0.265518	0.41439	-0.640743	0.521689	0.7463
ENSG00000048342.11	CC2D2A	7.47606	-0.228965	0.289382	-0.791219	0.428816	NA
ENSG00000048392.7	RRM2B	1303.59	0.0644336	0.19286	0.334095	0.738308	0.880829
ENSG00000048405.5	ZNF800	1299.93	-0.591928	0.245507	-2.41104	0.015907	0.0975925
ENSG00000048462.6	TNFRSF17	0	NA	NA	NA	NA	NA
ENSG00000048471.9	SNX29	1953.17	-0.0354841	0.252963	-0.140274	0.888444	0.955416
ENSG00000048540.10	LMO3	0	NA	NA	NA	NA	NA
ENSG00000048544.5	MRPS10	388.73	-0.00828005	0.250883	-0.0330036	0.973672	0.988077
ENSG00000048545.9	GUCA1A	0	NA	NA	NA	NA	NA
ENSG00000048649.9	RSF1	3742.78	0.225178	0.181918	1.23779	0.215792	0.4729
ENSG00000048707.9	VPS13D	6741.36	-0.201444	0.145245	-1.38693	0.165464	0.40587
ENSG00000048740.13	CELF2	9929.32	0.00576314	0.125116	0.0460624	0.963261	0.984534
ENSG00000048828.12	FAM120A	4343.64	0.177198	0.170837	1.03723	0.299627	0.56031
ENSG00000048991.12	R3HDM1	2193.55	-0.236381	0.167958	-1.40738	0.159314	0.397863
ENSG00000049089.9	COL9A2	273.402	0.11882	0.399096	0.297723	0.765914	0.894429
ENSG00000049130.9	KITLG	7.01724	0.145177	0.25344	0.572827	NA	NA
ENSG00000049167.9	ERCC8	404.228	-0.176931	0.293167	-0.603517	0.546165	0.764856
ENSG00000049192.10	ADAMTS6	190.671	0.65097	0.379319	1.71615	0.0861342	0.273947
ENSG00000049239.8	H6PD	4814.54	-0.147358	0.15222	-0.968061	0.333014	0.592221
ENSG00000049245.8	VAMP3	1553.78	-0.103384	0.180662	-0.572252	0.567151	0.777486
ENSG00000049246.10	PER3	860.895	0.0984491	0.240293	0.409705	0.682022	0.848558
ENSG00000049247.9	UTS2	2.57884	-0.275933	0.251817	-1.09577	NA	NA
ENSG00000049249.4	TNFRSF9	0	NA	NA	NA	NA	NA
ENSG00000049283.13	EPN3	1.38366	0.269329	0.249652	1.07882	NA	NA
ENSG00000049319.2	SRD5A2	2.72407	0.276448	0.251997	1.09703	NA	NA
ENSG00000049323.11	LTBP1	668.305	1.72368	0.379937	4.53675	5.7127e-06	0.000425018
ENSG00000049449.4	RCN1	1860.16	-0.0304375	0.192321	-0.158264	0.874249	0.948306
ENSG00000049540.12	ELN	550.765	0.592277	0.360078	1.64486	0.099999	0.300252
ENSG00000049541.6	RFC2	768.646	0.425143	0.268691	1.58227	0.113588	0.324555
ENSG00000049618.17	ARID1B	17985.5	-0.166411	0.0873135	-1.9059	0.0566632	0.215419
ENSG00000049656.9	CLPTM1L	1671.9	-0.0590819	0.226504	-0.260842	0.794214	0.908789
ENSG00000049759.12	NEDD4L	649.767	-0.147086	0.277582	-0.529885	0.596192	0.797115
ENSG00000049768.10	FOXP3	10.7711	-0.162632	0.272177	-0.597524	0.550158	NA
ENSG00000049769.8	PPP1R3F	299.769	-0.530572	0.315299	-1.68276	0.0924217	0.285855
ENSG00000049860.9	HEXB	1041.86	-0.0842147	0.238489	-0.353118	0.724	0.872973
ENSG00000049883.10	PTCD2	209.023	0.781527	0.324299	2.40989	0.0159571	0.0977799
ENSG00000050030.9	KIAA2022	19.2605	0.14877	0.312889	0.475472	0.634451	NA
ENSG00000050130.13	JKAMP	398.002	-0.00855318	0.386219	-0.0221459	0.982332	0.991951
ENSG00000050165.13	DKK3	3.61197	-0.278285	0.252524	-1.10202	0.270455	NA
ENSG00000050327.10	ARHGEF5	289.147	-0.203999	0.405495	-0.503087	0.614903	0.807709
ENSG00000050344.8	NFE2L3	1298.23	0.986857	0.270894	3.64297	0.000269515	0.00672276
ENSG00000050393.7	MCUR1	788.088	0.459417	0.290445	1.58177	0.113702	0.324646
ENSG00000050405.9	LIMA1	1791.21	0.732705	0.22594	3.24291	0.00118314	0.0175825
ENSG00000050426.11	LETMD1	1321.24	0.106087	0.200636	0.528751	0.596978	0.797441
ENSG00000050438.12	SLC4A8	662.716	0.241008	0.297018	0.811425	0.417122	0.665089
ENSG00000050555.13	LAMC3	13.4804	0.0108953	0.32807	0.0332104	0.973507	NA
ENSG00000050628.16	PTGER3	17.6103	0.0397579	0.260958	0.152354	0.878908	NA
ENSG00000050730.11	TNIP3	0	NA	NA	NA	NA	NA
ENSG00000050748.13	MAPK9	1001.25	-0.320465	0.246775	-1.29861	0.194077	0.444019
ENSG00000050767.11	COL23A1	17.5391	0.435624	0.347069	1.25515	0.209423	NA
ENSG00000050820.12	BCAR1	3.2295	0.106707	0.252547	0.422522	0.672644	NA
ENSG00000051009.6	FAM160A2	812.166	-0.272712	0.261955	-1.04106	0.297846	0.558491
ENSG00000051108.10	HERPUD1	508.489	-0.13679	0.314761	-0.434582	0.663866	0.837045
ENSG00000051128.14	HOMER3	0.0289592	0.0853979	0.214975	0.397245	0.691187	NA
ENSG00000051180.12	RAD51	179.595	0.0342815	0.400836	0.085525	0.931844	0.972118
ENSG00000051341.9	POLQ	283.585	0.229343	0.335759	0.683057	0.494571	0.72544
ENSG00000051382.4	PIK3CB	1765.96	0.239323	0.163582	1.46302	0.143461	0.373385
ENSG00000051523.6	CYBA	1036.15	-0.695245	0.17123	-4.0603	4.90103e-05	0.00197104
ENSG00000051596.5	THOC3	129.257	0.208323	0.42585	0.489193	0.624705	0.813567
ENSG00000051620.6	HEBP2	2615.04	-0.482178	0.193492	-2.49198	0.0127034	0.0848938
ENSG00000051825.10	MPHOSPH9	4868.01	0.000508199	0.154023	0.0032995	0.997367	0.998727
ENSG00000052126.10	PLEKHA5	2676.36	0.251838	0.173539	1.45119	0.146727	0.378738
ENSG00000052344.11	PRSS8	8.44648	0.000916848	0.253571	0.00361574	0.997115	NA
ENSG00000052723.7	SIKE1	1105.6	0.0300847	0.259454	0.115954	0.907689	0.963363
ENSG00000052749.9	RRP12	2700.76	-0.785691	0.23148	-3.3942	0.000688294	0.0120043
ENSG00000052795.8	FNIP2	1489.46	-0.0297781	0.168783	-0.176428	0.859958	0.942329
ENSG00000052802.8	MSMO1	135.301	-0.228473	0.425754	-0.536631	0.591522	0.794487
ENSG00000052841.10	TTC17	5526.15	0.358724	0.152084	2.35873	0.0183377	0.106572
ENSG00000052850.5	ALX4	3.08821	0.0271891	0.252518	0.107672	NA	NA
ENSG00000053108.12	FSTL4	3.47765	0.277977	0.252426	1.10122	0.2708	NA
ENSG00000053254.11	FOXN3	6277.18	-0.299396	0.160929	-1.86042	0.0628255	0.228359
ENSG00000053328.8	METTL24	273.687	0.401834	0.362448	1.10867	0.267574	0.529146
ENSG00000053371.8	AKR7A2	1031.47	-0.15623	0.268003	-0.582942	0.559932	0.77359
ENSG00000053372.4	MRTO4	662.308	0.285084	0.275451	1.03497	0.300682	0.561307
ENSG00000053438.7	NNAT	33.3025	-0.645771	0.421629	-1.53161	0.125619	NA
ENSG00000053501.8	USE1	521.159	0.0346221	0.275841	0.125515	0.900116	0.959955
ENSG00000053524.7	MCF2L2	369.164	-0.0188212	0.230265	-0.0817371	0.934856	0.973321
ENSG00000053702.10	NRIP2	80.3199	0.204225	0.41453	0.492666	0.622249	NA
ENSG00000053747.11	LAMA3	416.191	0.0164326	0.353182	0.0465272	0.96289	0.984241
ENSG00000053770.7	AP5M1	459.511	0.0911506	0.304599	0.299247	0.764751	0.894226
ENSG00000053900.6	ANAPC4	977.556	0.321301	0.257019	1.2501	0.211262	0.467746
ENSG00000053918.11	KCNQ1	250.976	0.500668	0.384193	1.30317	0.192517	0.441828
ENSG00000054116.7	TRAPPC3	501.967	0.0709497	0.338365	0.209684	0.833914	0.929365
ENSG00000054118.9	THRAP3	10662.2	0.362365	0.115638	3.13363	0.00172661	0.0230639
ENSG00000054148.13	PHPT1	343.26	0.385454	0.260198	1.48138	0.138504	0.365295
ENSG00000054179.7	ENTPD2	2.42494	-0.275551	0.251552	-1.0954	0.273341	NA
ENSG00000054219.9	LY75	445.929	0.142944	0.225044	0.635181	0.52531	0.748851
ENSG00000054267.16	ARID4B	4558.14	-0.414866	0.223469	-1.85648	0.0633847	0.229611
ENSG00000054277.8	OPN3	259.2	0.100113	0.368512	0.271667	0.785878	0.904504
ENSG00000054282.11	SDCCAG8	2094.94	0.0749401	0.176543	0.424487	0.671211	0.841796
ENSG00000054356.9	PTPRN	3.84574	-0.27856	0.252658	-1.10252	NA	NA
ENSG00000054392.8	HHAT	278.487	0.225088	0.322312	0.698355	0.484955	0.718328
ENSG00000054523.12	KIF1B	2179.15	-0.310451	0.223346	-1.39	0.164529	0.404322
ENSG00000054598.5	FOXC1	3.97004	0.00275259	0.252821	0.0108875	0.991313	NA
ENSG00000054611.9	TBC1D22A	1301.13	0.21117	0.188035	1.12303	0.261424	0.522595
ENSG00000054654.11	SYNE2	168.966	0.0752771	0.416791	0.180611	0.856673	0.940203
ENSG00000054690.9	PLEKHH1	31.5535	-0.0408532	0.347052	-0.117715	0.906293	NA
ENSG00000054793.9	ATP9A	3360.55	0.0348341	0.164899	0.211245	0.832696	0.928861
ENSG00000054796.8	SPO11	0	NA	NA	NA	NA	NA
ENSG00000054803.3	CBLN4	0	NA	NA	NA	NA	NA
ENSG00000054938.11	CHRDL2	0	NA	NA	NA	NA	NA
ENSG00000054965.6	FAM168A	3793.75	-0.0935287	0.135207	-0.691746	0.489097	0.720558
ENSG00000054967.8	RELT	1379.4	-1.13397	0.331493	-3.4208	0.000624377	0.0112916
ENSG00000054983.12	GALC	405.939	0.302653	0.351734	0.860458	0.389537	0.6413
ENSG00000055044.6	NOP58	1960.96	-0.365636	0.19893	-1.83801	0.066061	0.235354
ENSG00000055070.12	SZRD1	4164.89	-0.659568	0.182532	-3.61344	0.000302165	0.00719019
ENSG00000055118.10	KCNH2	40.061	-0.231999	0.398076	-0.5828	0.560028	NA
ENSG00000055130.11	CUL1	2386.59	0.717165	0.225064	3.18649	0.00144009	0.0201287
ENSG00000055147.13	FAM114A2	756.605	0.323639	0.227764	1.42094	0.155334	0.392256
ENSG00000055163.14	CYFIP2	6924.87	-0.43245	0.174836	-2.47347	0.0133809	0.0875817
ENSG00000055208.13	TAB2	7189.77	0.137839	0.19772	0.697142	0.485714	0.718557
ENSG00000055211.8	GINM1	957.658	-0.882467	0.288109	-3.06296	0.00219161	0.0266415
ENSG00000055332.12	EIF2AK2	4372.69	-0.108663	0.137775	-0.788695	0.43029	0.675802
ENSG00000055483.15	USP36	5215.36	-0.99198	0.219806	-4.51298	6.3924e-06	0.000449578
ENSG00000055609.13	KMT2C	14582.3	-0.0558878	0.143455	-0.389584	0.696844	0.857379
ENSG00000055732.8	MCOLN3	43.9958	0.404839	0.363319	1.11428	0.265159	NA
ENSG00000055813.5	CCDC85A	11.8309	1.38882	0.406908	3.41312	0.000642239	NA
ENSG00000055917.11	PUM2	7572.3	0.0408013	0.127935	0.318922	0.749786	0.887029
ENSG00000055950.12	MRPL43	519.928	0.168813	0.260001	0.64928	0.516158	0.741921
ENSG00000055955.11	ITIH4	19.7697	0.170355	0.291727	0.583955	NA	NA
ENSG00000055957.6	ITIH1	0	NA	NA	NA	NA	NA
ENSG00000056050.6	C4orf27	224.751	0.405623	0.361221	1.12292	0.261471	0.522595
ENSG00000056097.11	ZFR	5950.61	-0.148636	0.209419	-0.709753	0.477857	0.713841
ENSG00000056277.11	ZNF280C	632.665	0.56626	0.273998	2.06666	0.0387662	0.170737
ENSG00000056291.13	NPFFR2	0	NA	NA	NA	NA	NA
ENSG00000056487.11	PHF21B	0	NA	NA	NA	NA	NA
ENSG00000056558.6	TRAF1	306.136	-0.344466	0.388211	-0.887318	0.374908	0.628455
ENSG00000056586.11	RC3H2	4875.43	-0.0357507	0.12887	-0.277417	0.78146	0.902596
ENSG00000056661.9	PCGF2	21.4889	-0.121032	0.309143	-0.391509	0.695421	NA
ENSG00000056736.5	IL17RB	1.67603	-0.0267473	0.251069	-0.106534	NA	NA
ENSG00000056972.14	TRAF3IP2	702.395	0.122835	0.25785	0.476381	0.633803	0.81821
ENSG00000056998.14	GYG2	35.4323	0.104373	0.398556	0.261878	0.793415	NA
ENSG00000057019.11	DCBLD2	298.294	0.129606	0.344153	0.376594	0.706475	0.862839
ENSG00000057149.10	SERPINB3	0	NA	NA	NA	NA	NA
ENSG00000057252.8	SOAT1	767.4	0.165906	0.255101	0.650355	0.515463	0.741376
ENSG00000057294.9	PKP2	319.641	0.0366551	0.355053	0.103238	0.917774	0.966004
ENSG00000057468.6	MSH4	20.7411	-0.0351364	0.3266	-0.107582	0.914327	NA
ENSG00000057593.9	F7	52.5464	-0.652167	0.419077	-1.5562	0.119661	NA
ENSG00000057608.12	GDI2	12508.1	0.106163	0.094247	1.12644	0.259981	0.520803
ENSG00000057657.10	PRDM1	105.857	0.506019	0.427801	1.18284	0.236874	NA
ENSG00000057663.8	ATG5	804.062	-0.305267	0.186044	-1.64083	0.100832	0.301793
ENSG00000057704.6	TMCC3	74.9222	-0.935093	0.416579	-2.24469	0.0247878	NA
ENSG00000057757.5	PITHD1	1300.24	-0.29323	0.241256	-1.21543	0.224203	0.483491
ENSG00000057935.9	MTA3	199.763	0.124766	0.398548	0.313051	0.754242	0.889042
ENSG00000058056.4	USP13	1048.04	0.257582	0.256578	1.00391	0.315421	0.575839
ENSG00000058063.11	ATP11B	2571.47	-0.318187	0.246904	-1.28871	0.1975	0.448621
ENSG00000058085.10	LAMC2	0	NA	NA	NA	NA	NA
ENSG00000058091.12	CDK14	841.852	-0.334174	0.250623	-1.33337	0.182409	0.428329
ENSG00000058262.5	SEC61A1	3609.05	-0.242304	0.125467	-1.93121	0.0534567	0.20725
ENSG00000058272.11	PPP1R12A	4705.55	0.131601	0.153633	0.856591	0.391671	0.64322
ENSG00000058335.11	RASGRF1	0	NA	NA	NA	NA	NA
ENSG00000058404.15	CAMK2B	1.41442	0.270552	0.250032	1.08207	NA	NA
ENSG00000058453.12	CROCC	1408.37	-0.0677042	0.179007	-0.378221	0.705266	0.862703
ENSG00000058600.11	POLR3E	2748.5	-0.745777	0.133405	-5.59031	2.26666e-08	7.40127e-06
ENSG00000058668.10	ATP2B4	14104	0.286174	0.175055	1.63476	0.102099	0.304253
ENSG00000058673.11	ZC3H11A	6546.35	-0.258977	0.133026	-1.94681	0.051557	0.202085
ENSG00000058729.6	RIOK2	353.739	0.377312	0.253329	1.48942	0.136378	0.361552
ENSG00000058799.9	YIPF1	255.09	0.241104	0.283835	0.849451	0.395631	0.64709
ENSG00000058804.10	NDC1	642.051	0.546062	0.340818	1.60221	0.10911	0.315908
ENSG00000058866.10	DGKG	441.688	1.29282	0.315031	4.10378	4.06447e-05	0.0017399
ENSG00000059122.12	FLYWCH1	1556.32	-0.0926644	0.19745	-0.469307	0.63885	0.82118
ENSG00000059145.14	UNKL	1146.1	0.0508081	0.254198	0.199876	0.841578	0.933751
ENSG00000059377.11	TBXAS1	2306.56	0.201758	0.181928	1.109	0.26743	0.528999
ENSG00000059378.8	PARP12	756.061	-0.025565	0.246094	-0.103883	0.917262	0.965865
ENSG00000059573.4	ALDH18A1	2490.55	-0.0119461	0.167985	-0.0711142	0.943307	0.976367
ENSG00000059588.5	TARBP1	6634.42	-0.248078	0.206719	-1.20007	0.230111	0.488789
ENSG00000059691.7	PET112	660.757	0.697626	0.250753	2.78213	0.00540038	0.048121
ENSG00000059728.6	MXD1	1178.2	-0.911507	0.233836	-3.89807	9.69642e-05	0.0034472
ENSG00000059758.3	CDK17	2497.36	-0.795566	0.254346	-3.12789	0.00176064	0.0234055
ENSG00000059769.15	DNAJC25	182.249	-0.829547	0.394996	-2.10014	0.0357166	0.16207
ENSG00000059804.11	SLC2A3	2223.38	-1.47002	0.402819	-3.64934	NA	NA
ENSG00000059915.12	PSD	313.8	0.3308	0.324098	1.02068	0.307407	0.568171
ENSG00000060069.12	CTDP1	1565.86	-0.301322	0.165126	-1.82479	0.068032	0.238721
ENSG00000060138.8	YBX3	14122.2	-0.673882	0.130725	-5.15496	2.53683e-07	4.4508e-05
ENSG00000060140.4	STYK1	192.707	0.536929	0.426884	1.25779	0.208468	0.463759
ENSG00000060237.12	WNK1	12770.2	-0.00607864	0.122832	-0.0494873	0.960531	0.983112
ENSG00000060303.5	RPS17P5	3.18689	-0.292465	0.289762	-1.00933	NA	NA
ENSG00000060339.9	CCAR1	3472.35	-0.302159	0.182528	-1.65541	0.0978408	0.29596
ENSG00000060491.12	OGFR	1418.01	0.635791	0.214411	2.96529	0.00302402	0.0328585
ENSG00000060558.3	GNA15	5591.91	-0.973459	0.257732	-3.77702	0.000158716	0.00475945
ENSG00000060566.9	CREB3L3	0	NA	NA	NA	NA	NA
ENSG00000060642.6	PIGV	431.962	0.246425	0.297338	0.828768	0.407236	0.657813
ENSG00000060656.15	PTPRU	71.8348	0.891753	0.428883	2.07925	0.0375947	NA
ENSG00000060688.8	SNRNP40	1615.03	0.0598821	0.183836	0.325736	0.744624	0.884683
ENSG00000060709.9	RIMBP2	201.153	-0.054065	0.32955	-0.164057	0.869686	0.945863
ENSG00000060718.14	COL11A1	0	NA	NA	NA	NA	NA
ENSG00000060749.10	QSER1	2854.41	0.698368	0.142207	4.91092	9.06501e-07	0.000104964
ENSG00000060762.14	MPC1	220.788	0.460948	0.337228	1.36687	0.171665	0.414103
ENSG00000060971.13	ACAA1	1019.91	0.290435	0.200164	1.45098	0.146785	0.378805
ENSG00000060982.10	BCAT1	6240.36	0.172849	0.227331	0.760338	0.447053	0.688288
ENSG00000061273.13	HDAC7	4022.11	-0.207137	0.134324	-1.54207	0.123056	0.339319
ENSG00000061337.11	LZTS1	0	NA	NA	NA	NA	NA
ENSG00000061455.10	PRDM6	0.237619	-0.223899	0.232486	-0.963065	0.335515	NA
ENSG00000061492.7	WNT8A	2.04305	0.274283	0.251281	1.09154	NA	NA
ENSG00000061656.5	SPAG4	54.245	-0.0323703	0.429874	-0.0753017	0.939975	NA
ENSG00000061676.10	NCKAP1	443.741	0.288915	0.341614	0.845734	0.397701	0.649095
ENSG00000061794.8	MRPS35	1386.7	-0.120067	0.261293	-0.459513	0.645866	0.825424
ENSG00000061918.8	GUCY1B3	3755.09	1.25314	0.272796	4.59368	4.35498e-06	0.000345897
ENSG00000061936.5	SFSWAP	3291.89	-0.462548	0.217097	-2.13061	0.0331216	0.154998
ENSG00000061938.12	TNK2	5435.72	-0.0210914	0.143065	-0.147425	0.882796	0.95283
ENSG00000061987.10	MON2	2398.34	0.151696	0.163591	0.927288	0.353777	0.610668
ENSG00000062038.9	CDH3	44.7434	0.35151	0.38961	0.902208	0.366946	NA
ENSG00000062096.10	ARSF	0	NA	NA	NA	NA	NA
ENSG00000062194.11	GPBP1	3212.47	-0.153235	0.130667	-1.17271	0.240911	0.50032
ENSG00000062282.10	DGAT2	37.5435	-0.119231	0.351859	-0.338861	0.734714	NA
ENSG00000062370.12	ZNF112	224.087	1.45174	0.386257	3.75848	0.00017095	0.00502381
ENSG00000062485.14	CS	2055.74	-0.107379	0.157486	-0.681832	0.495345	0.725973
ENSG00000062524.11	LTK	0.436945	0.245867	0.241339	1.01876	NA	NA
ENSG00000062582.9	MRPS24	5.01646	0.279656	0.253008	1.10532	0.269019	NA
ENSG00000062598.13	ELMO2	1435.68	-0.389812	0.202578	-1.92426	0.0543225	0.209227
ENSG00000062650.13	WAPAL	5680.26	-0.157918	0.150653	-1.04822	0.294537	0.55515
ENSG00000062716.6	VMP1	1400.68	-0.692589	0.258909	-2.67503	0.00747229	0.0598498
ENSG00000062725.5	APPBP2	818.991	0.401552	0.241306	1.66407	0.0960976	0.292561
ENSG00000062822.8	POLD1	1203.66	-0.111421	0.219108	-0.508522	0.611087	0.805577
ENSG00000063015.15	SEZ6	27.9831	-0.346716	0.418722	-0.828035	0.407651	NA
ENSG00000063046.13	EIF4B	29788.9	-0.180372	0.120132	-1.50145	0.13324	0.35642
ENSG00000063127.11	SLC6A16	183.493	0.136356	0.423809	0.32174	0.74765	0.885846
ENSG00000063169.6	GLTSCR1	654.589	-0.476375	0.276951	-1.72007	0.0854194	0.272559
ENSG00000063176.11	SPHK2	377.026	1.09258	0.30359	3.59888	0.000319595	0.0074437
ENSG00000063177.8	RPL18	17676	-0.231753	0.118649	-1.95327	0.0507872	0.200528
ENSG00000063180.4	CA11	178.947	0.0205639	0.33621	0.0611637	0.951229	0.980346
ENSG00000063241.3	ISOC2	628.955	0.382664	0.312756	1.22352	0.221133	0.479154
ENSG00000063244.8	U2AF2	5630.55	-0.0507287	0.122142	-0.415327	0.677902	0.845683
ENSG00000063245.10	EPN1	1564.12	0.0465148	0.216911	0.214442	0.830202	0.92753
ENSG00000063322.9	MED29	1484.64	0.0239018	0.20188	0.118396	0.905754	0.962422
ENSG00000063438.12	AHRR	106.821	-1.13344	0.40982	-2.76571	0.00567986	NA
ENSG00000063515.2	GSC2	0.838176	0.262714	0.247343	1.06215	NA	NA
ENSG00000063587.12	ZNF275	1276.68	-0.800113	0.22927	-3.48983	0.000483335	0.00969556
ENSG00000063601.12	MTMR1	1114.73	0.224147	0.21456	1.04468	0.296171	0.556641
ENSG00000063660.4	GPC1	63.2953	0.517263	0.422709	1.22369	0.22107	NA
ENSG00000063761.11	ADCK1	222.529	0.286168	0.365337	0.783299	0.433452	0.678007
ENSG00000063854.8	HAGH	207.256	0.168584	0.374391	0.450289	0.652502	0.829835
ENSG00000063978.11	RNF4	2049.67	-0.441646	0.223463	-1.97637	0.048113	0.193953
ENSG00000064012.17	CASP8	1875.23	0.124392	0.206617	0.602043	0.547146	0.765405
ENSG00000064042.13	LIMCH1	3222.72	0.37796	0.228154	1.6566	0.0976003	0.295439
ENSG00000064102.10	ASUN	828.48	0.225747	0.234506	0.962651	0.335723	0.59452
ENSG00000064115.6	TM7SF3	3234.64	0.247058	0.22943	1.07683	0.281554	0.542747
ENSG00000064195.7	DLX3	1.0108	0.265793	0.248158	1.07106	0.284141	NA
ENSG00000064199.2	SPA17	48.9565	0.189263	0.429036	0.441135	0.659116	NA
ENSG00000064201.11	TSPAN32	1977.52	0.225872	0.281676	0.801887	0.422618	0.669435
ENSG00000064205.6	WISP2	1.4569	0.271341	0.25019	1.08454	0.278125	NA
ENSG00000064218.4	DMRT3	0	NA	NA	NA	NA	NA
ENSG00000064225.8	ST3GAL6	465.651	-0.0479755	0.335672	-0.142924	0.886351	0.954388
ENSG00000064270.8	ATP2C2	2.0096	-0.27383	0.251118	-1.09044	NA	NA
ENSG00000064300.4	NGFR	9.40934	-0.0169507	0.263221	-0.0643972	0.948654	NA
ENSG00000064309.10	CDON	3.98081	0.0597491	0.252896	0.23626	NA	NA
ENSG00000064313.7	TAF2	1339.59	-0.0777891	0.218273	-0.356385	0.721552	0.87185
ENSG00000064393.11	HIPK2	5148.61	0.150492	0.127151	1.18357	0.236584	0.495729
ENSG00000064419.9	TNPO3	1597.56	0.651073	0.142429	4.57121	4.84919e-06	0.000370145
ENSG00000064489.17	MEF2BNB-MEF2B	2.29525	0.112913	0.251857	0.448322	NA	NA
ENSG00000064490.9	RFXANK	431.85	-0.00642681	0.302457	-0.0212487	0.983047	0.992078
ENSG00000064545.10	TMEM161A	182.939	0.120905	0.382409	0.316166	0.751876	0.888004
ENSG00000064547.9	LPAR2	201.658	-0.0334458	0.341089	-0.098056	0.921888	0.968089
ENSG00000064601.12	CTSA	824.654	0.220862	0.225501	0.97943	0.327368	0.587154
ENSG00000064607.12	SUGP2	3947.74	-0.483629	0.184304	-2.62408	0.00868831	0.0662329
ENSG00000064651.9	SLC12A2	1414.64	0.21192	0.224545	0.943776	0.345284	0.603302
ENSG00000064652.6	SNX24	36.2889	0.0480899	0.33738	0.142539	0.886654	NA
ENSG00000064655.14	EYA2	0	NA	NA	NA	NA	NA
ENSG00000064666.10	CNN2	3677.02	-0.105407	0.183237	-0.575248	0.565124	0.776407
ENSG00000064687.8	ABCA7	1025.3	0.18344	0.252662	0.726032	0.467819	0.705661
ENSG00000064692.14	SNCAIP	0	NA	NA	NA	NA	NA
ENSG00000064703.7	DDX20	1198.17	-0.270427	0.224992	-1.20194	0.229386	0.488616
ENSG00000064726.5	BTBD1	1545.97	-4.49419e-05	0.247492	-0.000181589	0.999855	0.999855
ENSG00000064763.6	FAR2	1032.75	0.201687	0.26699	0.755412	0.450002	0.690932
ENSG00000064787.8	BCAS1	1.91333	-0.273543	0.251022	-1.08972	NA	NA
ENSG00000064835.6	POU1F1	0	NA	NA	NA	NA	NA
ENSG00000064886.9	CHI3L2	4.55331	0.0263977	0.253055	0.104316	NA	NA
ENSG00000064932.11	SBNO2	2137.39	-0.460878	0.288848	-1.59557	0.110584	0.318806
ENSG00000064933.12	PMS1	793.313	0.418096	0.302076	1.38408	0.166335	0.407094
ENSG00000064961.14	HMG20B	2163.57	-0.147259	0.1682	-0.875503	0.3813	0.633973
ENSG00000064989.8	CALCRL	351.009	0.402645	0.342936	1.17411	0.24035	0.500014
ENSG00000064995.12	TAF11	604.809	-0.670245	0.301455	-2.22337	0.026191	0.133795
ENSG00000064999.12	ANKS1A	1474.5	0.303061	0.168155	1.80227	0.0715022	0.245536
ENSG00000065000.11	AP3D1	5586.88	-0.14119	0.126918	-1.11245	0.265943	0.52789
ENSG00000065029.10	ZNF76	1176.14	0.492441	0.191082	2.57712	0.00996278	0.0724033
ENSG00000065054.9	SLC9A3R2	381.961	0.650785	0.293873	2.21451	0.0267937	0.135598
ENSG00000065057.3	NTHL1	167.977	0.0633147	0.425929	0.148651	0.881829	0.952369
ENSG00000065060.12	UHRF1BP1	3216.14	-0.541871	0.22443	-2.41443	0.0157598	0.0971456
ENSG00000065135.7	GNAI3	2325.18	-0.0967529	0.2112	-0.458111	0.646873	0.82598
ENSG00000065150.14	IPO5	7671.97	-0.292474	0.124081	-2.35711	0.0184176	0.10686
ENSG00000065154.7	OAT	583.711	0.713246	0.269679	2.6448	0.00817399	0.063844
ENSG00000065183.11	WDR3	2034.7	0.986079	0.287593	3.42874	0.000606399	0.0111205
ENSG00000065243.14	PKN2	2641.93	-0.306981	0.205259	-1.49558	0.134764	0.358811
ENSG00000065268.6	WDR18	487.438	0.0560582	0.333876	0.167901	0.866661	0.945222
ENSG00000065308.4	TRAM2	811.145	-0.108809	0.260709	-0.417359	0.676415	0.84489
ENSG00000065320.4	NTN1	12.4564	-0.447889	0.349869	-1.28016	0.200488	NA
ENSG00000065325.8	GLP2R	0	NA	NA	NA	NA	NA
ENSG00000065328.12	MCM10	324.57	0.171769	0.426049	0.403168	0.686825	0.85102
ENSG00000065357.15	DGKA	1481.89	-0.0427512	0.222125	-0.192465	0.847378	0.936644
ENSG00000065361.10	ERBB3	1.23718	0.234015	0.249761	0.936955	NA	NA
ENSG00000065371.13	ROPN1	0	NA	NA	NA	NA	NA
ENSG00000065413.12	ANKRD44	1411.82	-0.227216	0.225425	-1.00794	0.313481	0.574155
ENSG00000065427.10	KARS	3612.18	-0.375617	0.149472	-2.51296	0.0119722	0.0819646
ENSG00000065457.6	ADAT1	753.164	0.165086	0.208331	0.792421	0.428115	0.673694
ENSG00000065485.13	PDIA5	565.575	0.272792	0.36656	0.744195	0.456759	0.696485
ENSG00000065491.8	TBC1D22B	746.725	-0.336957	0.257001	-1.31111	0.189819	0.437944
ENSG00000065518.7	NDUFB4	397.24	-0.757596	0.278503	-2.72024	0.00652336	0.0546558
ENSG00000065526.6	SPEN	14250.6	-0.194476	0.166026	-1.17136	0.241455	0.500623
ENSG00000065534.14	MYLK	571.618	-0.210237	0.403341	-0.521239	0.602201	0.800415
ENSG00000065548.13	ZC3H15	3582.54	-0.926168	0.21484	-4.31096	1.62548e-05	0.000917835
ENSG00000065559.10	MAP2K4	769.279	0.392269	0.261129	1.5022	0.133044	0.356168
ENSG00000065600.8	TMEM206	373.564	0.374826	0.32123	1.16685	0.243272	0.502922
ENSG00000065609.10	SNAP91	0	NA	NA	NA	NA	NA
ENSG00000065613.9	SLK	4929.36	-0.321535	0.206383	-1.55795	0.119244	0.334298
ENSG00000065615.9	CYB5R4	1094.85	-0.510898	0.231552	-2.2064	0.0273557	0.137376
ENSG00000065618.12	COL17A1	7.2954	0.123082	0.274708	0.448047	0.654119	NA
ENSG00000065621.10	GSTO2	391.275	0.502678	0.379462	1.32471	0.185266	0.432604
ENSG00000065665.16	SEC61A2	220.115	-0.314478	0.422402	-0.744499	0.456575	0.696414
ENSG00000065675.10	PRKCQ	2151.25	0.812053	0.219492	3.6997	0.000215855	0.00584478
ENSG00000065717.10	TLE2	88.6282	0.124788	0.427414	0.29196	0.770317	NA
ENSG00000065802.7	ASB1	500.083	0.441851	0.315838	1.39898	0.16182	0.401594
ENSG00000065809.9	FAM107B	221.439	-0.910806	0.420787	-2.16453	0.0304237	0.146893
ENSG00000065833.7	ME1	10.6591	0.0396384	0.305033	0.129948	0.896608	NA
ENSG00000065882.11	TBC1D1	3602.01	-0.145322	0.179031	-0.811715	0.416955	0.665089
ENSG00000065883.10	CDK13	3492.58	0.375642	0.153025	2.45477	0.0140976	0.0907047
ENSG00000065911.7	MTHFD2	878.395	-0.29363	0.231353	-1.26918	0.204376	0.458393
ENSG00000065923.5	SLC9A7	5219.12	0.0442005	0.114238	0.386914	0.69882	0.858515
ENSG00000065970.4	FOXJ2	2439.94	-0.58465	0.200087	-2.92198	0.00347819	0.0360092
ENSG00000065978.13	YBX1	8358.77	-0.569547	0.144257	-3.94814	7.87621e-05	0.00291147
ENSG00000065989.11	PDE4A	10.1508	0.14918	0.286087	0.521452	0.602052	NA
ENSG00000066027.7	PPP2R5A	1414.12	0.257421	0.20589	1.25029	0.211195	0.467746
ENSG00000066032.14	CTNNA2	0	NA	NA	NA	NA	NA
ENSG00000066044.9	ELAVL1	2466.75	0.0720547	0.152752	0.471712	0.637133	0.820207
ENSG00000066056.9	TIE1	2441.89	0.103092	0.17658	0.583826	0.559337	0.773167
ENSG00000066084.8	DIP2B	3950.95	0.0608922	0.138704	0.439008	0.660655	0.834859
ENSG00000066117.10	SMARCD1	2504.3	-0.802241	0.150916	-5.31581	1.06184e-07	2.31147e-05
ENSG00000066135.8	KDM4A	3279.61	0.348199	0.155192	2.24367	0.0248535	0.129443
ENSG00000066136.15	NFYC	1927.74	0.511833	0.114729	4.46124	8.14867e-06	0.000550503
ENSG00000066185.8	ZMYND12	24.0485	0.125327	0.375595	0.333675	0.738625	NA
ENSG00000066230.6	SLC9A3	45.1794	0.120868	0.425662	0.283953	0.776446	NA
ENSG00000066248.10	NGEF	0	NA	NA	NA	NA	NA
ENSG00000066279.12	ASPM	518.064	0.718536	0.335664	2.14064	0.032303	0.152376
ENSG00000066294.10	CD84	1881.37	0.746555	0.229906	3.24722	0.00116537	0.0173844
ENSG00000066322.8	ELOVL1	345.398	0.19565	0.288645	0.677821	0.497885	0.727792
ENSG00000066336.7	SPI1	1352.78	-0.210837	0.19573	-1.07718	0.2814	0.542607
ENSG00000066379.10	ZNRD1	363.752	0.69565	0.263484	2.6402	0.00828576	0.0644174
ENSG00000066382.12	MPPED2	743.087	0.313524	0.262213	1.19568	0.23182	0.490285
ENSG00000066405.8	CLDN18	0.0312432	-0.0864513	0.215062	-0.401983	0.687697	NA
ENSG00000066422.4	ZBTB11	2212.87	0.447243	0.191623	2.33398	0.019597	0.111125
ENSG00000066427.17	ATXN3	1383.39	-0.537891	0.19691	-2.73166	0.00630156	0.0535779
ENSG00000066455.8	GOLGA5	950.263	0.358885	0.270862	1.32497	0.18518	0.432604
ENSG00000066468.16	FGFR2	65.5448	-0.0336572	0.374535	-0.0898638	0.928395	NA
ENSG00000066557.5	LRRC40	345.9	-0.210823	0.310103	-0.679849	0.4966	0.726875
ENSG00000066583.7	ISOC1	322.573	0.132057	0.37325	0.353802	0.723487	0.872624
ENSG00000066629.12	EML1	0	NA	NA	NA	NA	NA
ENSG00000066651.13	TRMT11	496.043	0.032018	0.279866	0.114405	0.908917	0.963363
ENSG00000066654.8	THUMPD1	3934.92	-0.14658	0.155318	-0.943743	0.345301	0.603302
ENSG00000066697.10	MSANTD3	448.439	-0.392933	0.367068	-1.07046	0.284411	0.546015
ENSG00000066735.10	KIF26A	114.061	0.254888	0.428749	0.594492	0.552183	NA
ENSG00000066739.7	ATG2B	2735.33	0.443355	0.194385	2.2808	0.02256	0.121948
ENSG00000066777.4	ARFGEF1	4352.57	0.0240715	0.129369	0.186068	0.852391	0.938101
ENSG00000066813.10	ACSM2B	0	NA	NA	NA	NA	NA
ENSG00000066827.11	ZFAT	961.762	0.403752	0.245213	1.64653	0.0996541	0.299446
ENSG00000066855.11	MTFR1	307.786	0.391972	0.339783	1.15359	0.248667	0.508303
ENSG00000066923.13	STAG3	118.688	-0.204266	0.425887	-0.479626	0.631494	0.816919
ENSG00000066926.6	FECH	795.368	0.332454	0.238804	1.39216	0.163873	0.404036
ENSG00000066933.11	MYO9A	3186.68	0.185709	0.160676	1.1558	0.247765	0.507488
ENSG00000067048.12	DDX3Y	2450.74	-1.71952	0.321604	-5.34671	8.95689e-08	2.11068e-05
ENSG00000067057.12	PFKP	2322.84	-0.117331	0.16708	-0.702244	0.482527	0.716532
ENSG00000067064.6	IDI1	1105.87	-0.604009	0.317233	-1.90399	0.056911	0.216029
ENSG00000067066.12	SP100	2945.57	-0.0769273	0.153413	-0.501439	0.616062	0.808611
ENSG00000067082.10	KLF6	9803.08	-1.3539	0.233045	-5.80963	6.26113e-09	2.83075e-06
ENSG00000067113.12	PPAP2A	35.027	0.281588	0.39277	0.716929	0.473418	NA
ENSG00000067141.12	NEO1	23.235	0.120807	0.306557	0.394076	NA	NA
ENSG00000067167.3	TRAM1	1682.7	-0.506314	0.208853	-2.42426	0.0153395	0.0956323
ENSG00000067177.10	PHKA1	510.051	-0.367723	0.309308	-1.18886	0.234496	0.493554
ENSG00000067182.3	TNFRSF1A	2741.63	0.207322	0.178535	1.16124	0.245544	0.505302
ENSG00000067191.11	CACNB1	340.867	0.174289	0.355826	0.489815	0.624265	0.813281
ENSG00000067208.10	EVI5	507.279	0.202023	0.332755	0.607122	0.54377	0.763495
ENSG00000067221.9	STOML1	177.333	0.722385	0.305476	2.36478	0.0180408	0.105823
ENSG00000067225.13	PKM	10212.7	0.0877979	0.149646	0.586705	0.557402	0.772126
ENSG00000067248.5	DHX29	1072.1	-0.0101607	0.253526	-0.0400773	0.968031	0.986766
ENSG00000067334.9	DNTTIP2	3072.53	-0.881368	0.230428	-3.82492	0.000130816	0.00416731
ENSG00000067365.10	METTL22	743.201	-0.501424	0.283705	-1.76741	0.0771588	0.257232
ENSG00000067369.9	TP53BP1	7260.75	-0.600047	0.144718	-4.14631	3.37872e-05	0.0015454
ENSG00000067445.16	TRO	1118.87	-0.0444134	0.199426	-0.222706	0.823764	0.924601
ENSG00000067533.5	RRP15	809.691	0.355663	0.187946	1.89237	0.0584421	0.218646
ENSG00000067560.6	RHOA	8652.39	-0.383576	0.140886	-2.7226	0.006477	0.0544628
ENSG00000067596.6	DHX8	2844.78	-0.324915	0.192003	-1.69224	0.0906007	0.282197
ENSG00000067601.6	PMS2P4	62.5382	-0.464548	0.430001	-1.08034	0.27999	NA
ENSG00000067606.11	PRKCZ	759.165	0.304124	0.262444	1.15881	0.246532	0.506287
ENSG00000067646.7	ZFY	638.995	-1.89149	0.339813	-5.56626	2.60265e-08	7.72608e-06
ENSG00000067704.8	IARS2	2217.66	0.36909	0.201928	1.82783	0.0675753	0.238042
ENSG00000067715.9	SYT1	163.009	-0.247426	0.430259	-0.575064	0.565248	0.776407
ENSG00000067798.9	NAV3	5.12896	-0.197432	0.253097	-0.780063	0.435354	NA
ENSG00000067829.14	IDH3G	1020.24	-0.369714	0.23028	-1.6055	0.108384	0.314884
ENSG00000067836.8	ROGDI	160.751	-0.427701	0.34429	-1.24227	0.214138	0.470767
ENSG00000067840.8	PDZD4	5.68583	0.279623	0.253045	1.10503	NA	NA
ENSG00000067842.13	ATP2B3	0.87389	0.262258	0.247234	1.06077	NA	NA
ENSG00000067900.6	ROCK1	7881.58	-0.254166	0.188561	-1.34792	0.177683	0.422549
ENSG00000067955.9	CBFB	1356.29	-0.633989	0.226148	-2.80343	0.00505626	0.0461463
ENSG00000067992.8	PDK3	473.94	-0.053157	0.307442	-0.172901	0.862729	0.943308
ENSG00000068001.9	HYAL2	103.639	-0.247751	0.420685	-0.588923	0.555913	NA
ENSG00000068024.12	HDAC4	1151.21	0.135723	0.235745	0.575718	0.564806	0.776407
ENSG00000068028.13	RASSF1	2870.59	-0.273779	0.155967	-1.75536	0.0791976	0.261274
ENSG00000068078.13	FGFR3	81.9444	0.254523	0.430148	0.591709	0.554045	NA
ENSG00000068079.3	IFI35	346.256	-0.139475	0.352573	-0.395593	0.692405	0.854568
ENSG00000068097.10	HEATR6	1081.34	0.165457	0.247755	0.667824	0.504246	0.733681
ENSG00000068120.10	COASY	965.687	-0.176945	0.201462	-0.878302	0.37978	0.632877
ENSG00000068137.10	PLEKHH3	69.5139	-0.546531	0.428921	-1.2742	0.202593	NA
ENSG00000068305.13	MEF2A	635.585	-0.305735	0.28964	-1.05557	0.291165	0.552485
ENSG00000068308.9	OTUD5	2478.94	-0.374914	0.181894	-2.06117	0.0392867	0.172062
ENSG00000068323.12	TFE3	2133.93	-0.5866	0.234059	-2.50621	0.0122032	0.082775
ENSG00000068354.11	TBC1D25	632.967	-0.3223	0.241151	-1.33651	0.181384	0.426775
ENSG00000068366.15	ACSL4	1389.23	0.44771	0.185488	2.41369	0.0157921	0.0972424
ENSG00000068383.14	INPP5A	343.288	-0.129471	0.328004	-0.394724	0.693046	0.854568
ENSG00000068394.9	GPKOW	572.683	0.329991	0.22278	1.48124	0.138543	0.365313
ENSG00000068400.9	GRIPAP1	1822.51	-0.600343	0.248512	-2.41575	0.015703	0.0970882
ENSG00000068438.10	FTSJ1	781.971	0.0777045	0.229138	0.339117	0.734522	0.878987
ENSG00000068489.8	PRR11	121.457	0.122223	0.369256	0.330998	0.740646	0.882544
ENSG00000068615.12	REEP1	2.27214	0.275545	0.251665	1.09489	NA	NA
ENSG00000068650.14	ATP11A	1193.7	-0.406032	0.230772	-1.75945	0.0785015	0.260159
ENSG00000068654.11	POLR1A	4046.3	0.264814	0.170555	1.55266	0.120505	0.336094
ENSG00000068697.6	LAPTM4A	2175.25	-0.757015	0.219273	-3.45238	0.000555661	0.0105615
ENSG00000068724.11	TTC7A	1561.27	-0.94061	0.239351	-3.92984	8.50027e-05	0.00312252
ENSG00000068745.10	IP6K2	3484.27	-0.84829	0.235679	-3.59934	0.000319024	0.0074437
ENSG00000068781.16	STON1-GTF2A1L	0	NA	NA	NA	NA	NA
ENSG00000068784.8	SRBD1	1020.85	0.339792	0.292373	1.16219	0.245159	0.504937
ENSG00000068793.13	CYFIP1	3626.65	0.125918	0.160727	0.783426	0.433377	0.678007
ENSG00000068796.12	KIF2A	5191.1	0.225645	0.149131	1.51307	0.130263	0.351928
ENSG00000068831.14	RASGRP2	3132.89	-0.247196	0.180899	-1.36648	0.171787	0.414312
ENSG00000068878.10	PSME4	3509.43	-0.756227	0.273103	-2.76902	0.00562258	0.0495054
ENSG00000068885.10	IFT80	300.157	0.0449715	0.342477	0.131312	0.895528	0.957865
ENSG00000068903.15	SIRT2	700.622	-0.0695274	0.234848	-0.296053	0.76719	0.895474
ENSG00000068912.9	ERLEC1	993.246	-0.235102	0.241632	-0.972973	0.330567	0.590369
ENSG00000068971.9	PPP2R5B	198.768	0.17959	0.356389	0.503914	0.614322	0.807306
ENSG00000068976.9	PYGM	176.077	0.643168	0.35896	1.79175	0.0731723	0.2491
ENSG00000068985.4	PAGE1	0	NA	NA	NA	NA	NA
ENSG00000069011.11	PITX1	3.17554	-0.0979433	0.252325	-0.388164	NA	NA
ENSG00000069018.13	TRPC7	5.43024	-0.279951	0.253091	-1.10613	0.268671	NA
ENSG00000069020.14	MAST4	5969.67	0.295531	0.188743	1.56579	0.117399	0.330703
ENSG00000069122.14	GPR116	2.48812	0.275864	0.251696	1.09602	0.273068	NA
ENSG00000069188.12	SDK2	2650.61	-0.0928602	0.381066	-0.243685	0.807475	0.916319
ENSG00000069206.11	ADAM7	0	NA	NA	NA	NA	NA
ENSG00000069248.9	NUP133	1724.61	0.115227	0.161448	0.713708	0.475408	0.712536
ENSG00000069275.12	NUCKS1	10284.5	0.147078	0.137927	1.06635	0.286267	0.547967
ENSG00000069329.11	VPS35	3178.31	0.0922496	0.122853	0.750897	0.452715	0.693556
ENSG00000069345.7	DNAJA2	2053.37	-0.541979	0.208384	-2.60086	0.00929892	0.0691828
ENSG00000069399.8	BCL3	1087.02	-2.26406	0.385431	-5.87409	4.25179e-09	2.27181e-06
ENSG00000069424.10	KCNAB2	9638.43	-0.240591	0.108973	-2.2078	0.0272582	0.13699
ENSG00000069431.6	ABCC9	0	NA	NA	NA	NA	NA
ENSG00000069482.6	GAL	0	NA	NA	NA	NA	NA
ENSG00000069493.10	CLEC2D	412.867	0.0626036	0.312601	0.200267	0.841272	0.933731
ENSG00000069509.5	FUNDC1	227.492	0.506067	0.338153	1.49656	0.134508	0.358291
ENSG00000069535.12	MAOB	0.635996	0.257001	0.245325	1.04759	NA	NA
ENSG00000069667.11	RORA	388.521	-0.0158656	0.315409	-0.0503017	0.959882	0.982924
ENSG00000069696.6	DRD4	20.9546	0.0212041	0.405126	0.0523395	0.958258	NA
ENSG00000069702.6	TGFBR3	11.8636	0.126135	0.253759	0.497067	0.619142	NA
ENSG00000069712.9	KIAA1107	461.648	0.701314	0.394341	1.77845	0.0753304	0.253043
ENSG00000069764.5	PLA2G10	0	NA	NA	NA	NA	NA
ENSG00000069812.7	HES2	0.803459	0.260627	0.246666	1.0566	NA	NA
ENSG00000069849.6	ATP1B3	862.428	-0.130162	0.229534	-0.567071	0.570666	0.780652
ENSG00000069869.11	NEDD4	3141.73	0.370013	0.211515	1.74934	0.0802319	0.262975
ENSG00000069943.5	PIGB	427.288	0.286587	0.293508	0.97642	0.328857	0.588746
ENSG00000069956.7	MAPK6	1813.08	-0.835762	0.268049	-3.11795	0.00182116	0.0238394
ENSG00000069966.14	GNB5	805.441	-0.161555	0.263287	-0.613609	0.539474	0.759935
ENSG00000069974.11	RAB27A	488.846	-0.134946	0.301592	-0.447445	0.654553	0.831414
ENSG00000069998.8	CECR5	307.025	0.006146	0.301891	0.0203583	0.983758	0.992454
ENSG00000070010.14	UFD1L	929.843	-0.541368	0.190304	-2.84475	0.00444462	0.0425114
ENSG00000070018.4	LRP6	2169.22	0.590945	0.22329	2.64653	0.00813214	0.0636016
ENSG00000070019.3	GUCY2C	0	NA	NA	NA	NA	NA
ENSG00000070031.3	SCT	8.4727	0.0747948	0.253551	0.294989	0.768002	NA
ENSG00000070047.7	PHRF1	3365.97	0.191379	0.130346	1.46824	0.142039	0.370752
ENSG00000070061.10	IKBKAP	1855.89	0.329895	0.199404	1.6544	0.0980456	0.296203
ENSG00000070081.11	NUCB2	8578.94	-0.195307	0.161516	-1.20922	0.22658	0.486118
ENSG00000070087.9	PFN2	59.8491	-0.359349	0.428936	-0.837768	0.402161	NA
ENSG00000070159.9	PTPN3	0	NA	NA	NA	NA	NA
ENSG00000070182.13	SPTB	89.14	0.908819	0.408201	2.2264	0.0259871	NA
ENSG00000070190.8	DAPP1	613.503	0.57615	0.300522	1.91716	0.0552173	0.211702
ENSG00000070193.4	FGF10	0	NA	NA	NA	NA	NA
ENSG00000070214.11	SLC44A1	2205.72	0.136933	0.201095	0.68094	0.495909	0.726513
ENSG00000070269.9	TMEM260	486.434	0.758039	0.33507	2.26233	0.0236769	0.125542
ENSG00000070366.9	SMG6	2509.1	-0.101632	0.152483	-0.666515	0.505082	0.733947
ENSG00000070367.11	EXOC5	1040.67	0.263853	0.247093	1.06783	0.285598	0.547133
ENSG00000070371.11	CLTCL1	80.7673	0.158811	0.418999	0.379023	0.70467	NA
ENSG00000070388.7	FGF22	0	NA	NA	NA	NA	NA
ENSG00000070404.5	FSTL3	167.047	-0.157026	0.40701	-0.385802	0.699643	0.858988
ENSG00000070413.14	DGCR2	2093.11	0.861457	0.209759	4.10688	4.01037e-05	0.00173764
ENSG00000070423.13	RNF126	619.482	-0.716622	0.241296	-2.96989	0.00297905	0.03263
ENSG00000070444.10	MNT	1775.01	-0.140079	0.138625	-1.01049	0.312259	0.573084
ENSG00000070476.10	ZXDC	2454.15	-0.569222	0.218321	-2.60728	0.00912659	0.0686392
ENSG00000070495.10	JMJD6	895.953	-0.473821	0.314441	-1.50686	0.131846	0.354493
ENSG00000070501.7	POLB	552.107	-0.0446269	0.269263	-0.165737	0.868364	0.945762
ENSG00000070526.10	ST6GALNAC1	0	NA	NA	NA	NA	NA
ENSG00000070540.8	WIPI1	174.69	-0.622945	0.405144	-1.53759	0.124149	0.340956
ENSG00000070601.5	FRMPD1	0	NA	NA	NA	NA	NA
ENSG00000070610.10	GBA2	756.089	-0.141335	0.300701	-0.470018	0.638342	0.820814
ENSG00000070614.10	NDST1	1218.03	0.0210279	0.241128	0.0872063	0.930508	0.971759
ENSG00000070669.12	ASNS	320.431	0.455248	0.343301	1.32609	0.18481	0.432242
ENSG00000070718.7	AP3M2	1062.49	-0.473139	0.289693	-1.63324	0.102418	0.304944
ENSG00000070729.9	CNGB1	2.05998	0.273879	0.251163	1.09044	NA	NA
ENSG00000070731.5	ST6GALNAC2	83.3315	-0.229835	0.429644	-0.534941	0.59269	NA
ENSG00000070748.13	CHAT	0	NA	NA	NA	NA	NA
ENSG00000070756.9	PABPC1	78235.2	-0.0955197	0.135176	-0.706634	0.479794	0.714788
ENSG00000070759.12	TESK2	484.454	-0.186231	0.270323	-0.688919	0.490875	0.72191
ENSG00000070761.3	C16orf80	1491.31	-0.508538	0.233589	-2.17706	0.0294762	0.144214
ENSG00000070770.4	CSNK2A2	4946.99	-0.356672	0.187729	-1.89994	0.0574415	0.217037
ENSG00000070778.8	PTPN21	24.7808	0.253081	0.344651	0.73431	0.46276	NA
ENSG00000070785.12	EIF2B3	368.421	0.408826	0.334335	1.2228	0.221403	0.479458
ENSG00000070808.11	CAMK2A	70.5748	-0.282983	0.254119	-1.11359	NA	NA
ENSG00000070814.13	TCOF1	3579.2	0.131067	0.182199	0.719362	0.471918	0.709438
ENSG00000070831.11	CDC42	3213.32	-0.820788	0.201911	-4.06509	4.80137e-05	0.00195972
ENSG00000070882.8	OSBPL3	1395.34	0.149614	0.257234	0.581625	0.560819	0.77396
ENSG00000070886.6	EPHA8	0	NA	NA	NA	NA	NA
ENSG00000070915.5	SLC12A3	0	NA	NA	NA	NA	NA
ENSG00000070950.5	RAD18	763.342	0.163484	0.241979	0.675612	0.499287	0.729174
ENSG00000070961.10	ATP2B1	2855.28	-1.37581	0.2616	-5.25921	1.44677e-07	2.83447e-05
ENSG00000070985.9	TRPM5	11.408	-0.279402	0.306396	-0.9119	0.361822	NA
ENSG00000071051.9	NCK2	1258.23	-0.0627389	0.22797	-0.275207	0.783157	0.903347
ENSG00000071054.11	MAP4K4	2739.52	-0.310691	0.182272	-1.70454	0.0882795	0.277628
ENSG00000071073.8	MGAT4A	514.298	0.0363862	0.305539	0.119088	0.905205	0.962354
ENSG00000071082.6	RPL31	18240.4	-0.305887	0.155748	-1.96399	0.0495311	0.197526
ENSG00000071127.12	WDR1	8274.96	-0.366475	0.130282	-2.81294	0.00490904	0.0452239
ENSG00000071189.17	SNX13	1165.39	0.0962554	0.166998	0.576386	0.564355	0.776268
ENSG00000071203.5	MS4A12	0	NA	NA	NA	NA	NA
ENSG00000071205.7	ARHGAP10	307.395	-0.344617	0.371961	-0.926486	0.354194	0.610849
ENSG00000071242.7	RPS6KA2	1003.72	0.140517	0.323958	0.43375	0.66447	0.837444
ENSG00000071243.11	ING3	1278.66	-0.428297	0.242735	-1.76446	0.0776544	0.25852
ENSG00000071246.6	VASH1	711.541	-0.689643	0.357406	-1.92958	0.0536588	0.20776
ENSG00000071282.7	LMCD1	27.2697	0.357367	0.351324	1.0172	NA	NA
ENSG00000071462.7	WBSCR22	913.774	-0.476611	0.23003	-2.07196	0.0382695	0.169311
ENSG00000071537.9	SEL1L	2803.78	0.272179	0.226421	1.20209	0.229329	0.488616
ENSG00000071539.9	TRIP13	139.773	0.0534861	0.402138	0.133004	0.89419	0.957681
ENSG00000071553.12	ATP6AP1	1247.28	-0.283407	0.21129	-1.34132	0.179817	0.425716
ENSG00000071564.10	TCF3	2397.68	-0.0492806	0.167347	-0.294482	0.76839	0.896178
ENSG00000071575.7	TRIB2	94.1156	-0.127101	0.425243	-0.298891	0.765023	NA
ENSG00000071626.12	DAZAP1	2919.3	-0.358828	0.185128	-1.93827	0.0525904	0.205314
ENSG00000071655.13	MBD3	585.159	-0.0210797	0.214466	-0.0982892	0.921703	0.96807
ENSG00000071677.1	PRLH	0	NA	NA	NA	NA	NA
ENSG00000071794.11	HLTF	1880.44	1.01973	0.248392	4.10532	4.03764e-05	0.00173855
ENSG00000071859.10	FAM50A	320.755	0.197845	0.390587	0.506534	0.612482	0.806421
ENSG00000071889.12	FAM3A	873.323	-0.309172	0.233503	-1.32406	0.185484	0.43287
ENSG00000071894.10	CPSF1	5193.47	-0.394949	0.143866	-2.74525	0.00604643	0.0519559
ENSG00000071909.14	MYO3B	3.18467	0.277211	0.25226	1.09891	NA	NA
ENSG00000071967.7	CYBRD1	2979.09	0.980678	0.289706	3.38508	0.000711568	0.012228
ENSG00000071991.4	CDH19	0	NA	NA	NA	NA	NA
ENSG00000071994.6	PDCD2	1989.96	-0.00544572	0.158451	-0.0343685	0.972583	0.987853
ENSG00000072041.12	SLC6A15	0	NA	NA	NA	NA	NA
ENSG00000072042.8	RDH11	708.476	0.102844	0.259968	0.395602	0.692398	0.854568
ENSG00000072062.9	PRKACA	1084.76	0.182969	0.192567	0.950161	0.34203	0.600353
ENSG00000072071.12	LPHN1	2287.76	-0.0383012	0.185012	-0.20702	0.835994	0.930318
ENSG00000072080.6	SPP2	0	NA	NA	NA	NA	NA
ENSG00000072110.9	ACTN1	2464.64	0.323491	0.208591	1.55084	0.120941	0.336887
ENSG00000072121.11	ZFYVE26	3087.35	0.0158296	0.154236	0.102632	0.918255	0.96626
ENSG00000072133.6	RPS6KA6	121.791	-0.218615	0.428259	-0.510473	0.60972	0.804768
ENSG00000072134.11	EPN2	147.374	0.565466	0.428737	1.31891	0.187198	0.434799
ENSG00000072135.8	PTPN18	3115.67	0.243187	0.180814	1.34496	0.178639	0.42388
ENSG00000072163.14	LIMS2	17.7507	0.235532	0.263107	0.895194	0.370684	NA
ENSG00000072182.8	ASIC4	16.5484	-0.0179522	0.322051	-0.0557432	0.955546	NA
ENSG00000072195.10	SPEG	413.187	0.941993	0.343053	2.74591	0.00603435	0.0518901
ENSG00000072201.9	LNX1	41.4519	0.121708	0.413336	0.294453	0.768412	NA
ENSG00000072210.14	ALDH3A2	805.322	0.917871	0.27049	3.39337	0.00069039	0.0120165
ENSG00000072274.8	TFRC	3007.04	-0.85898	0.187271	-4.58683	4.50031e-06	0.000355041
ENSG00000072310.12	SREBF1	1673.32	-0.762287	0.235025	-3.24342	0.00118103	0.0175735
ENSG00000072315.3	TRPC5	0	NA	NA	NA	NA	NA
ENSG00000072364.8	AFF4	5991.03	-0.699897	0.221466	-3.16029	0.00157611	0.0215432
ENSG00000072401.10	UBE2D1	244.373	-0.27068	0.331064	-0.817608	0.413581	0.662424
ENSG00000072415.4	MPP5	1450.81	-0.185296	0.185818	-0.997191	0.318672	0.579874
ENSG00000072422.12	RHOBTB1	919.122	0.0657304	0.219851	0.298978	0.764957	0.894321
ENSG00000072444.10	ASAH2C	0.129098	0.177157	0.220721	0.802627	0.42219	NA
ENSG00000072501.13	SMC1A	5393.56	-0.0781703	0.123127	-0.634877	0.525509	0.748952
ENSG00000072506.8	HSD17B10	363.708	0.0812043	0.322148	0.252071	0.800986	0.911922
ENSG00000072518.16	MARK2	2323.98	0.483532	0.201265	2.40246	0.016285	0.099238
ENSG00000072571.15	HMMR	192.353	1.05405	0.350989	3.00308	0.00267262	0.0304235
ENSG00000072609.13	CHFR	1258.41	-0.573739	0.169513	-3.38463	0.000712743	0.012228
ENSG00000072657.4	TRHDE	88.0788	0.745994	0.413843	1.8026	NA	NA
ENSG00000072682.14	P4HA2	39.2218	0.356918	0.400012	0.892269	0.372249	NA
ENSG00000072694.14	FCGR2B	7.5809	-0.0090936	0.253466	-0.035877	0.97138	NA
ENSG00000072736.14	NFATC3	3918.97	0.384297	0.136754	2.81013	0.00495215	0.0454369
ENSG00000072756.12	TRNT1	913.542	-0.0597552	0.178205	-0.335318	0.737385	0.880493
ENSG00000072778.15	ACADVL	3007.67	-0.481234	0.213877	-2.25005	0.024446	0.128058
ENSG00000072786.8	STK10	7234.75	0.122523	0.134109	0.913604	0.360925	0.616263
ENSG00000072803.13	FBXW11	1519	-0.019895	0.230713	-0.0862326	0.931281	0.972035
ENSG00000072818.7	ACAP1	4678.15	-0.0524072	0.175673	-0.298322	0.765457	0.894382
ENSG00000072832.10	CRMP1	23.4042	0.0297985	0.330836	0.0900704	0.928231	NA
ENSG00000072840.8	EVC	1370.55	0.384189	0.278754	1.37824	0.168131	0.409184
ENSG00000072849.6	DERL2	617.502	-0.440176	0.270421	-1.62774	0.103579	0.306265
ENSG00000072858.6	SIDT1	414.419	0.123057	0.279703	0.439956	0.659969	0.834491
ENSG00000072864.8	NDE1	1904.27	-0.401831	0.19926	-2.01661	0.0437361	0.184338
ENSG00000072952.14	MRVI1	217.904	0.588118	0.364085	1.61533	0.106239	0.310822
ENSG00000072954.2	TMEM38A	9.95381	-0.121423	0.253655	-0.478692	NA	NA
ENSG00000072958.4	AP1M1	2073.34	-0.0879957	0.172083	-0.511357	0.609101	0.804312
ENSG00000073008.10	PVR	643.045	0.350994	0.260213	1.34887	0.177378	0.42231
ENSG00000073009.8	IKBKG	164.967	-0.380464	0.394475	-0.964483	0.334804	0.59392
ENSG00000073050.7	XRCC1	1734.69	-0.0940665	0.189152	-0.497307	0.618972	0.810056
ENSG00000073060.11	SCARB1	1252.86	0.246084	0.252368	0.975099	0.329511	0.589738
ENSG00000073067.9	CYP2W1	4.2846	0.238776	0.252851	0.944333	NA	NA
ENSG00000073111.9	MCM2	3399.46	-0.168727	0.236284	-0.714083	0.475176	0.71246
ENSG00000073146.11	MOV10L1	23.4965	-0.39079	0.298448	-1.30941	NA	NA
ENSG00000073150.9	PANX2	598.199	-0.896807	0.390957	-2.29387	NA	NA
ENSG00000073169.9	SELO	789.51	-0.891021	0.326524	-2.72881	0.00635632	0.0538318
ENSG00000073282.8	TP63	0	NA	NA	NA	NA	NA
ENSG00000073331.13	ALPK1	1584.76	0.126767	0.191248	0.662839	0.507434	0.735498
ENSG00000073350.9	LLGL2	429.341	0.206874	0.26896	0.769163	0.441796	0.684232
ENSG00000073417.10	PDE8A	450.044	0.100678	0.314619	0.320001	0.748968	0.886707
ENSG00000073464.7	CLCN4	282.249	0.796007	0.351766	2.26289	0.0236426	0.125471
ENSG00000073536.13	NLE1	766.096	0.750921	0.266273	2.82012	0.00480062	0.0446481
ENSG00000073578.12	SDHA	4962.15	-0.312582	0.148758	-2.10128	0.0356162	0.162024
ENSG00000073584.14	SMARCE1	1072.66	-0.528791	0.266359	-1.98526	0.0471161	0.191976
ENSG00000073598.5	FNDC8	14.7627	-0.183929	0.319704	-0.575309	0.565082	NA
ENSG00000073605.14	GSDMB	197.986	0.741568	0.40097	1.84943	0.0643953	0.231914
ENSG00000073614.7	KDM5A	6212.38	-0.0438428	0.183871	-0.238443	0.811537	0.918703
ENSG00000073670.9	ADAM11	68.1707	0.0849949	0.429705	0.197798	0.843203	NA
ENSG00000073711.6	PPP2R3A	373.417	0.512614	0.304155	1.68537	0.0919174	0.285066
ENSG00000073712.9	FERMT2	2.89379	-0.277157	0.252137	-1.09923	0.271667	NA
ENSG00000073734.8	ABCB11	1.94922	-0.129996	0.25117	-0.517559	0.604766	NA
ENSG00000073737.12	DHRS9	5.38037	0.279829	0.253105	1.10559	0.268906	NA
ENSG00000073754.5	CD5L	0	NA	NA	NA	NA	NA
ENSG00000073756.7	PTGS2	1790.1	-0.424041	0.334918	-1.26611	0.205475	0.459718
ENSG00000073792.11	IGF2BP2	4919.33	-0.0530446	0.146188	-0.362852	0.716715	0.868466
ENSG00000073803.9	MAP3K13	357.035	0.11198	0.292715	0.382558	0.702047	0.86059
ENSG00000073849.10	ST6GAL1	4113.7	0.595154	0.271827	2.18946	0.0285636	0.141613
ENSG00000073861.2	TBX21	6.39114	-0.280392	0.253272	-1.10708	NA	NA
ENSG00000073905.8	VDAC1P1	2.63922	-0.297008	0.286099	-1.03813	0.29921	NA
ENSG00000073910.15	FRY	5456.91	0.324853	0.161804	2.00769	0.0446765	0.186562
ENSG00000073921.13	PICALM	2574.96	-0.0912595	0.156022	-0.584913	0.558606	0.772983
ENSG00000073969.14	NSF	486.643	0.444717	0.399688	1.11266	0.265855	0.527803
ENSG00000074047.16	GLI2	30.0254	0.128391	0.334165	0.384214	0.70082	NA
ENSG00000074054.13	CLASP1	4694.56	-0.0420318	0.133929	-0.313837	0.753645	0.888783
ENSG00000074071.9	MRPS34	958.836	0.494373	0.341068	1.44949	0.147202	0.379465
ENSG00000074181.4	NOTCH3	30.5802	-0.345682	0.328164	-1.05338	0.292167	NA
ENSG00000074201.4	CLNS1A	4462.6	0.0352271	0.148055	0.237933	0.811933	0.918858
ENSG00000074211.9	PPP2R2C	0.175596	-0.0799796	0.227997	-0.350793	0.725744	NA
ENSG00000074219.9	TEAD2	51.8269	0.469484	0.42033	1.11694	0.26402	NA
ENSG00000074266.13	EED	585.494	-0.187886	0.244128	-0.76962	0.441525	0.684082
ENSG00000074276.6	CDHR2	31.9512	0.460238	0.356783	1.28996	0.197063	NA
ENSG00000074317.6	SNCB	0	NA	NA	NA	NA	NA
ENSG00000074319.8	TSG101	670.499	-0.2745	0.307105	-0.893831	0.371412	0.625137
ENSG00000074356.12	C17orf85	2325.23	0.0162653	0.154333	0.105391	0.916066	0.965398
ENSG00000074370.13	ATP2A3	10540.7	0.311935	0.15549	2.00615	0.0448408	0.18685
ENSG00000074410.9	CA12	0.900994	0.263999	0.24779	1.06542	NA	NA
ENSG00000074416.9	MGLL	3605.68	0.134764	0.15331	0.879029	0.379386	0.632632
ENSG00000074527.7	NTN4	0.0332183	-0.0902367	0.214967	-0.41977	0.674653	NA
ENSG00000074582.8	BCS1L	391.018	0.0966491	0.333206	0.290058	0.771772	0.898009
ENSG00000074590.9	NUAK1	3.7566	-0.121067	0.252741	-0.479013	0.631929	NA
ENSG00000074603.14	DPP8	2219.51	0.351731	0.161198	2.18198	0.0291111	0.142707
ENSG00000074621.9	SLC24A1	1715.59	0.498543	0.225455	2.21127	0.0270169	0.136302
ENSG00000074657.9	ZNF532	1288.46	-0.0191095	0.24791	-0.0770825	0.938558	0.974758
ENSG00000074660.11	SCARF1	2104.97	0.862164	0.208064	4.14375	3.41677e-05	0.00155074
ENSG00000074695.5	LMAN1	3319.13	-0.0389549	0.132565	-0.293855	0.768868	0.896365
ENSG00000074696.8	PTPLAD1	948.176	0.0593466	0.205377	0.288964	0.772609	0.898143
ENSG00000074706.9	IPCEF1	14.2168	-0.07868	0.26416	-0.297849	0.765818	NA
ENSG00000074755.10	ZZEF1	5778.27	-0.114057	0.131738	-0.865788	0.386606	0.639089
ENSG00000074771.3	NOX3	0	NA	NA	NA	NA	NA
ENSG00000074800.9	ENO1	18179.7	-0.495319	0.170045	-2.91287	0.00358127	0.0367667
ENSG00000074803.13	SLC12A1	0	NA	NA	NA	NA	NA
ENSG00000074842.3	C19orf10	248.669	-0.156066	0.380014	-0.410686	0.681303	0.848291
ENSG00000074855.6	ANO8	444.888	0.0207293	0.27945	0.0741789	0.940868	0.975386
ENSG00000074935.9	TUBE1	328.915	0.753379	0.320254	2.35244	0.0186506	0.107793
ENSG00000074964.12	ARHGEF10L	0.423997	0.24618	0.241368	1.01994	NA	NA
ENSG00000074966.6	TXK	377.025	-0.225934	0.32349	-0.698425	0.484911	0.718328
ENSG00000075035.5	WSCD2	0	NA	NA	NA	NA	NA
ENSG00000075043.13	KCNQ2	4.30497	0.0733532	0.252965	0.289973	0.771837	NA
ENSG00000075073.10	TACR2	6.04076	-0.039209	0.253262	-0.154816	0.876966	NA
ENSG00000075089.5	ACTR6	289.744	-0.230122	0.329869	-0.697615	0.485418	0.718557
ENSG00000075131.5	TIPIN	200.948	0.28492	0.339593	0.839004	0.401467	0.652912
ENSG00000075142.9	SRI	976.068	0.0249051	0.229682	0.108433	0.913653	0.964882
ENSG00000075151.15	EIF4G3	6479	0.369304	0.152575	2.42048	0.0155001	0.0962514
ENSG00000075188.4	NUP37	192.6	0.676046	0.329011	2.05478	0.0399003	0.173972
ENSG00000075213.6	SEMA3A	1.79379	-0.273017	0.250664	-1.08918	0.276076	NA
ENSG00000075218.14	GTSE1	83.3192	0.0547571	0.42666	0.128339	0.897881	NA
ENSG00000075223.9	SEMA3C	368.305	0.346712	0.343602	1.00905	0.31295	0.573905
ENSG00000075234.12	TTC38	623.585	0.160542	0.227483	0.705734	0.480354	0.715146
ENSG00000075239.9	ACAT1	404.237	0.222203	0.364513	0.609587	0.542135	0.761932
ENSG00000075240.12	GRAMD4	1243.11	0.0204711	0.168663	0.121373	0.903396	0.961817
ENSG00000075275.12	CELSR1	72.5382	-0.246763	0.427934	-0.576638	0.564184	NA
ENSG00000075290.7	WNT8B	0	NA	NA	NA	NA	NA
ENSG00000075292.14	ZNF638	7334.41	0.502457	0.15136	3.31963	0.000901381	0.0145853
ENSG00000075303.8	SLC25A40	505.07	0.461034	0.292108	1.5783	0.114496	0.326042
ENSG00000075336.7	TIMM21	237.044	0.269785	0.385548	0.699744	0.484087	0.717765
ENSG00000075340.18	ADD2	125.062	0.289135	0.428515	0.674738	0.499842	0.729712
ENSG00000075388.2	FGF4	0	NA	NA	NA	NA	NA
ENSG00000075391.12	RASAL2	849.313	-0.126504	0.298692	-0.423527	0.67191	0.842449
ENSG00000075399.8	VPS9D1	326.194	-0.350445	0.352432	-0.994362	0.320047	0.581436
ENSG00000075407.13	ZNF37A	2134.71	0.127242	0.221262	0.575075	0.565241	0.776407
ENSG00000075413.13	MARK3	3142.3	0.0955746	0.147157	0.649473	0.516033	0.741921
ENSG00000075415.8	SLC25A3	5316.79	-0.410937	0.149523	-2.74832	0.00599016	0.0516613
ENSG00000075420.8	FNDC3B	1230.12	-0.355118	0.225506	-1.57476	0.115311	0.327252
ENSG00000075426.7	FOSL2	10536.8	-2.19742	0.28574	-7.69028	1.4681e-14	2.87625e-11
ENSG00000075429.4	CACNG5	0	NA	NA	NA	NA	NA
ENSG00000075461.5	CACNG4	0.405429	0.246368	0.241438	1.02042	NA	NA
ENSG00000075539.9	FRYL	5195.47	0.351889	0.138726	2.53658	0.0111943	0.078506
ENSG00000075568.12	TMEM131	2901.21	0.0986433	0.197682	0.499	0.617779	0.809317
ENSG00000075618.13	FSCN1	2125.11	-0.199429	0.222047	-0.89814	0.369111	0.623084
ENSG00000075624.9	ACTB	56172.2	0.0795467	0.184512	0.431118	0.666383	0.838686
ENSG00000075643.5	MOCOS	64.0737	0.0568111	0.412316	0.137785	0.89041	NA
ENSG00000075651.11	PLD1	170.012	0.799437	0.398097	2.00814	0.0446279	0.186488
ENSG00000075673.7	ATP12A	9.68421	-0.221163	0.253552	-0.872259	0.383067	NA
ENSG00000075702.12	WDR62	255.505	-0.190598	0.377364	-0.505079	0.613504	0.80708
ENSG00000075711.16	DLG1	3117.86	-0.349647	0.180821	-1.93366	0.0531551	0.206627
ENSG00000075785.8	RAB7A	4944.9	-0.0392785	0.14459	-0.271655	0.785887	0.904504
ENSG00000075790.6	BCAP29	896.079	-0.178998	0.204172	-0.876698	0.380651	0.633608
ENSG00000075826.12	SEC31B	929.087	-0.506736	0.328604	-1.54208	0.123053	0.339319
ENSG00000075856.7	SART3	2282.58	-0.0501144	0.184297	-0.271922	0.785682	0.904504
ENSG00000075884.8	ARHGAP15	3017.58	-0.0175068	0.158538	-0.110426	0.912071	0.964675
ENSG00000075886.10	TUBA3D	13.0359	-0.106676	0.264823	-0.402819	NA	NA
ENSG00000075891.17	PAX2	0	NA	NA	NA	NA	NA
ENSG00000075914.8	EXOSC7	367.256	-0.101738	0.331853	-0.306576	0.759166	0.891152
ENSG00000075945.8	KIFAP3	759.325	0.310271	0.385339	0.805191	0.42071	0.667772
ENSG00000075975.11	MKRN2	807.001	-0.0540133	0.204995	-0.263486	0.792176	0.907959
ENSG00000076003.4	MCM6	2207.17	0.0620378	0.182306	0.340295	0.733634	0.878195
ENSG00000076043.5	REXO2	597.43	0.658889	0.254946	2.58443	0.00975412	0.0713058
ENSG00000076053.6	RBM7	621.263	-0.323687	0.285598	-1.13336	0.257061	0.51747
ENSG00000076067.7	RBMS2	988.136	-0.438855	0.244468	-1.79514	0.0726311	0.247975
ENSG00000076108.7	BAZ2A	12204.4	-0.43975	0.152489	-2.88382	0.00392886	0.039172
ENSG00000076201.10	PTPN23	2651.13	-0.0304036	0.166797	-0.182279	0.855364	0.939526
ENSG00000076242.10	MLH1	1231	0.00661589	0.199411	0.0331772	0.973533	0.988075
ENSG00000076248.6	UNG	871.423	0.759181	0.316907	2.3956	0.0165933	0.10044
ENSG00000076258.5	FMO4	181.234	0.692889	0.417645	1.65904	0.0971081	0.294658
ENSG00000076321.6	KLHL20	648.457	0.0830596	0.293067	0.283415	0.776858	0.900234
ENSG00000076344.11	RGS11	192.101	-0.305045	0.430241	-0.709009	0.478319	0.714251
ENSG00000076351.8	SLC46A1	669.744	0.803408	0.30883	2.60145	0.00928295	0.0691515
ENSG00000076356.6	PLXNA2	35.6621	0.28652	0.323078	0.886846	0.375162	NA
ENSG00000076382.12	SPAG5	392.661	0.218722	0.309046	0.707734	0.47911	0.714532
ENSG00000076513.12	ANKRD13A	3164.25	-0.0903166	0.151947	-0.594397	0.552247	0.768972
ENSG00000076554.11	TPD52	723.732	-0.0518215	0.22181	-0.23363	0.815272	0.920219
ENSG00000076555.11	ACACB	4510.69	0.609604	0.178968	3.40622	0.00065868	0.0116258
ENSG00000076604.10	TRAF4	440.359	-0.783819	0.317411	-2.46941	0.0135335	0.088381
ENSG00000076641.4	PAG1	227.003	0.0609528	0.409862	0.148715	0.881778	0.952369
ENSG00000076650.2	GPATCH1	679.266	0.608762	0.293658	2.07303	0.0381694	0.169115
ENSG00000076662.5	ICAM3	8779.54	-0.223327	0.13614	-1.64043	0.100916	0.301793
ENSG00000076685.14	NT5C2	5936.19	0.135269	0.124835	1.08359	0.278548	0.539902
ENSG00000076706.10	MCAM	7.12758	0.201599	0.25342	0.795514	0.426314	NA
ENSG00000076716.7	GPC4	4.22971	-0.0665379	0.25296	-0.263037	NA	NA
ENSG00000076770.10	MBNL3	1866.75	-0.0756598	0.220211	-0.343579	0.731163	0.877112
ENSG00000076826.5	CAMSAP3	122.042	0.376367	0.422566	0.89067	0.373106	0.62691
ENSG00000076864.15	RAP1GAP	24.1445	-0.448459	0.340721	-1.31621	0.188104	NA
ENSG00000076924.7	XAB2	2934.48	-0.46318	0.201212	-2.30195	0.021338	0.117484
ENSG00000076928.13	ARHGEF1	5955.2	-0.381505	0.156998	-2.43	0.0150988	0.0946555
ENSG00000076944.10	STXBP2	510	-0.683677	0.277408	-2.46452	0.0137197	0.08907
ENSG00000076984.13	MAP2K7	1765.35	-0.424137	0.184813	-2.29495	0.0217363	0.119119
ENSG00000077009.9	NMRK2	0	NA	NA	NA	NA	NA
ENSG00000077044.5	DGKD	1589.06	-0.0708856	0.211568	-0.335049	0.737589	0.880493
ENSG00000077063.6	CTTNBP2	2.39172	-0.275449	0.251517	-1.09515	0.27345	NA
ENSG00000077080.5	ACTL6B	1.18724	-0.268125	0.249191	-1.07598	NA	NA
ENSG00000077092.14	RARB	3.62193	0.278117	0.252545	1.10126	0.270785	NA
ENSG00000077097.9	TOP2B	9965.65	0.271417	0.165387	1.6411	0.100776	0.301793
ENSG00000077147.10	TM9SF3	4187.98	-0.425194	0.165896	-2.56302	0.0103767	0.074377
ENSG00000077150.13	NFKB2	2496.08	-0.437769	0.237553	-1.84283	0.0653544	0.234006
ENSG00000077152.5	UBE2T	31.749	0.277595	0.397604	0.698168	0.485072	NA
ENSG00000077157.16	PPP1R12B	1682.4	-0.135536	0.200169	-0.67711	0.498336	0.728146
ENSG00000077232.12	DNAJC10	2531.33	-0.00104518	0.197095	-0.00530293	0.995769	0.997891
ENSG00000077235.13	GTF3C1	5856.93	0.0209431	0.115948	0.180625	0.856662	0.940203
ENSG00000077238.9	IL4R	984.292	-0.0140731	0.250589	-0.0561601	0.955214	0.982273
ENSG00000077254.10	USP33	2255.73	0.34721	0.181143	1.91677	0.055267	0.211761
ENSG00000077264.10	PAK3	0	NA	NA	NA	NA	NA
ENSG00000077274.7	CAPN6	11.1094	-0.0363813	0.257079	-0.141518	0.887461	NA
ENSG00000077279.12	DCX	0	NA	NA	NA	NA	NA
ENSG00000077312.4	SNRPA	1701.77	0.0467761	0.177974	0.262826	0.792684	0.908099
ENSG00000077327.11	SPAG6	101.136	0.37887	0.418414	0.905491	0.365206	NA
ENSG00000077348.4	EXOSC5	261.673	0.0158421	0.391442	0.0404711	0.967718	0.986687
ENSG00000077380.11	DYNC1I2	2266.19	0.338567	0.181362	1.8668	0.06193	0.226505
ENSG00000077420.11	APBB1IP	2291.4	0.250769	0.246056	1.01915	0.308131	0.568884
ENSG00000077454.11	LRCH4	2448.12	-0.033587	0.155813	-0.21556	0.829331	0.927193
ENSG00000077458.8	FAM76B	1545.53	-0.773287	0.241358	-3.2039	0.0013558	0.0193416
ENSG00000077463.10	SIRT6	240.423	0.408738	0.340546	1.20024	0.230044	0.488735
ENSG00000077498.8	TYR	0	NA	NA	NA	NA	NA
ENSG00000077514.4	POLD3	595.847	0.677826	0.27006	2.50991	0.0120763	0.0822962
ENSG00000077522.8	ACTN2	9.1021	-0.258987	0.275132	-0.941317	NA	NA
ENSG00000077549.13	CAPZB	3902.03	0.0556657	0.133594	0.416677	0.676914	0.845065
ENSG00000077585.9	GPR137B	103.91	0.34832	0.403559	0.863121	0.388071	NA
ENSG00000077616.6	NAALAD2	93.9798	0.445926	0.414697	1.07531	0.282238	NA
ENSG00000077684.11	PHF17	2829.09	-0.0211696	0.159893	-0.132399	0.894669	0.957725
ENSG00000077713.14	SLC25A43	314.216	0.113723	0.388303	0.292872	0.76962	0.896615
ENSG00000077721.11	UBE2A	875.137	-0.549874	0.211259	-2.60284	0.00924554	0.0689327
ENSG00000077782.15	FGFR1	807.803	-1.07978	0.342182	-3.15557	0.00160183	0.0217432
ENSG00000077800.7	FKBP6	1.91012	-0.273885	0.251109	-1.0907	NA	NA
ENSG00000077809.8	GTF2I	5342.25	0.347844	0.162111	2.14572	0.0318956	0.151365
ENSG00000077935.12	SMC1B	32.1472	0.157204	0.357866	0.439283	0.660457	NA
ENSG00000077942.13	FBLN1	7.37176	0.203067	0.253436	0.801255	NA	NA
ENSG00000077943.7	ITGA8	0	NA	NA	NA	NA	NA
ENSG00000077984.4	CST7	16.8481	0.352494	0.294728	1.196	0.231697	NA
ENSG00000078018.15	MAP2	1.91862	-0.274196	0.251118	-1.0919	0.274877	NA
ENSG00000078043.11	PIAS2	934.939	-0.323236	0.253596	-1.27461	0.202447	0.455632
ENSG00000078053.12	AMPH	0.910302	0.262994	0.247489	1.06265	NA	NA
ENSG00000078061.8	ARAF	1377.36	-0.880161	0.220042	-3.99997	6.33493e-05	0.00245766
ENSG00000078070.7	MCCC1	1843.28	-0.207128	0.15864	-1.30565	0.191673	0.44075
ENSG00000078081.3	LAMP3	20.4807	-0.0295644	0.253951	-0.116417	NA	NA
ENSG00000078098.9	FAP	0	NA	NA	NA	NA	NA
ENSG00000078114.14	NEBL	5.09085	-0.279735	0.253018	-1.10559	0.268902	NA
ENSG00000078124.7	ACER3	331.33	-0.598179	0.328672	-1.81999	0.0687606	0.239562
ENSG00000078140.9	UBE2K	1421.19	0.0154762	0.145102	0.106657	0.915061	0.965063
ENSG00000078142.7	PIK3C3	3073.14	0.20095	0.157117	1.27899	0.200901	0.453512
ENSG00000078177.9	N4BP2	2813.05	-0.943224	0.214345	-4.40049	1.08006e-05	0.000684435
ENSG00000078237.4	C12orf5	34.0827	-0.425631	0.397038	-1.07202	0.283713	NA
ENSG00000078246.11	TULP3	259.892	0.381495	0.340929	1.11899	0.263146	0.524284
ENSG00000078269.9	SYNJ2	1980.97	0.197888	0.202382	0.977796	0.328175	0.588154
ENSG00000078295.11	ADCY2	3.78113	0.278301	0.252605	1.10172	0.270582	NA
ENSG00000078304.15	PPP2R5C	3843.52	-0.368743	0.178693	-2.06356	0.0390597	0.171451
ENSG00000078319.7	PMS2P1	625.486	-0.57783	0.198475	-2.91135	0.00359871	0.0369135
ENSG00000078328.15	RBFOX1	0	NA	NA	NA	NA	NA
ENSG00000078369.13	GNB1	9661.52	-0.179176	0.0978097	-1.83188	0.0669694	0.236546
ENSG00000078399.11	HOXA9	887.983	0.0899724	0.2882	0.312187	0.754899	0.889144
ENSG00000078401.6	EDN1	13.952	-0.436434	0.299211	-1.45862	NA	NA
ENSG00000078403.12	MLLT10	2756.88	-0.0707997	0.18292	-0.387053	0.698717	0.858515
ENSG00000078487.13	ZCWPW1	342.82	0.839695	0.305397	2.74952	0.00596833	0.0515108
ENSG00000078549.10	ADCYAP1R1	0	NA	NA	NA	NA	NA
ENSG00000078579.8	FGF20	67.2619	0.250798	0.414523	0.605027	0.545161	NA
ENSG00000078589.8	P2RY10	0	NA	NA	NA	NA	NA
ENSG00000078596.6	ITM2A	726.485	0.0725641	0.25321	0.286577	0.774436	0.899023
ENSG00000078618.15	NRD1	3991.53	0.0985254	0.16865	0.5842	0.559086	0.773001
ENSG00000078668.9	VDAC3	1187.85	-0.0501739	0.164427	-0.305143	0.760257	0.89165
ENSG00000078674.13	PCM1	14638.4	-0.160533	0.155649	-1.03138	0.302363	0.562741
ENSG00000078687.12	TNRC6C	2158.58	0.666815	0.204556	3.25982	0.00111484	0.0167957
ENSG00000078699.17	CBFA2T2	2180.33	0.695332	0.202226	3.43839	0.000585183	0.010867
ENSG00000078725.8	BRINP1	0.0289592	0.0853979	0.214975	0.397245	0.691187	NA
ENSG00000078747.8	ITCH	2318.13	-0.220664	0.224389	-0.983396	0.325413	0.585941
ENSG00000078795.12	PKD2L2	28.8775	0.00906121	0.366947	0.0246935	0.980299	NA
ENSG00000078804.8	TP53INP2	480.953	-0.786022	0.376735	-2.08641	0.0369418	0.16566
ENSG00000078808.12	SDF4	1636.72	0.298486	0.149329	1.99885	0.0456245	0.188512
ENSG00000078814.11	MYH7B	134.632	0.0383472	0.398232	0.0962938	0.923287	0.968799
ENSG00000078898.6	BPIFB2	0	NA	NA	NA	NA	NA
ENSG00000078900.10	TP73	9.33892	0.235213	0.253556	0.927656	0.353586	NA
ENSG00000078902.11	TOLLIP	1061.14	0.257336	0.121594	2.11636	0.0343144	0.158556
ENSG00000078967.8	UBE2D4	574.477	0.0808112	0.330761	0.244319	0.806984	0.915912
ENSG00000079101.12	CLUL1	24.5259	0.588129	0.369725	1.59072	0.111672	NA
ENSG00000079102.12	RUNX1T1	108.746	0.341592	0.402566	0.848536	0.39614	NA
ENSG00000079112.5	CDH17	0	NA	NA	NA	NA	NA
ENSG00000079134.7	THOC1	2450.62	-0.541331	0.234117	-2.31222	0.0207656	0.115433
ENSG00000079150.13	FKBP7	122.423	0.597611	0.429051	1.39287	0.16366	0.404009
ENSG00000079156.12	OSBPL6	83.1558	0.61483	0.424693	1.4477	0.1477	NA
ENSG00000079215.9	SLC1A3	107.645	0.14406	0.42891	0.335875	0.736965	NA
ENSG00000079246.11	XRCC5	10583.2	0.0507393	0.115836	0.438028	0.661366	0.8353
ENSG00000079257.3	LXN	319.512	0.619665	0.407795	1.51955	0.128624	0.348702
ENSG00000079263.14	SP140	13.5537	0.239719	0.330402	0.725539	0.468122	NA
ENSG00000079277.15	MKNK1	519.14	0.0700159	0.260691	0.268578	0.788255	0.905495
ENSG00000079308.12	TNS1	5759.47	0.544729	0.143186	3.80435	0.000142177	0.00440975
ENSG00000079313.7	REXO1	1905.13	-0.529973	0.245189	-2.16148	0.030658	0.147638
ENSG00000079332.10	SAR1A	1290.68	-0.541065	0.223877	-2.4168	0.0156576	0.0969392
ENSG00000079335.13	CDC14A	1495.13	-0.187619	0.285443	-0.65729	0.510994	0.738473
ENSG00000079337.11	RAPGEF3	1637.11	0.540985	0.255766	2.11516	0.0344162	0.158714
ENSG00000079385.17	CEACAM1	112.907	0.415893	0.430094	0.966982	0.333553	NA
ENSG00000079387.9	SENP1	1203.15	-0.0747106	0.207467	-0.360109	0.718766	0.870322
ENSG00000079393.16	DUSP13	1.79822	0.272308	0.250649	1.08641	NA	NA
ENSG00000079432.3	CIC	8161.41	-0.139258	0.159268	-0.87436	0.381922	0.634557
ENSG00000079435.5	LIPE	175.169	0.210486	0.420622	0.500415	0.616783	0.808611
ENSG00000079459.8	FDFT1	2214.02	-0.140056	0.192464	-0.7277	0.466797	0.704396
ENSG00000079462.3	PAFAH1B3	421.705	0.413621	0.269255	1.53617	0.124497	0.341531
ENSG00000079482.11	OPHN1	642.531	0.478666	0.255022	1.87696	0.0605238	0.223448
ENSG00000079557.3	AFM	0	NA	NA	NA	NA	NA
ENSG00000079616.8	KIF22	1575.23	-0.349785	0.182927	-1.91215	0.0558564	0.213387
ENSG00000079689.9	SCGN	0	NA	NA	NA	NA	NA
ENSG00000079691.15	LRRC16A	1134.18	0.485243	0.231145	2.0993	0.0357906	0.162195
ENSG00000079739.11	PGM1	771.971	0.0412952	0.266248	0.155101	0.876742	0.949959
ENSG00000079785.10	DDX1	2107.23	-0.2933	0.165285	-1.77452	0.075978	0.254306
ENSG00000079805.12	DNM2	4921.63	-0.30658	0.109232	-2.80667	0.00500561	0.045862
ENSG00000079819.12	EPB41L2	1056.11	-0.420646	0.234047	-1.79727	0.0722923	0.247249
ENSG00000079841.14	RIMS1	3.49087	-0.278163	0.252482	-1.10171	0.270586	NA
ENSG00000079931.10	MOXD1	6.29656	0.28032	0.253264	1.10683	0.268369	NA
ENSG00000079950.9	STX7	2164.65	0.396401	0.184074	2.15349	0.03128	0.149409
ENSG00000079974.13	RABL2B	278.254	-0.307615	0.38401	-0.80106	0.423097	0.669788
ENSG00000079999.9	KEAP1	1646.53	0.44479	0.234539	1.89644	0.0579015	0.217522
ENSG00000080007.6	DDX43	138.938	-0.212084	0.427635	-0.495946	0.619932	0.810722
ENSG00000080031.5	PTPRH	6.07512	-0.0958482	0.253298	-0.378401	NA	NA
ENSG00000080166.11	DCT	11.0152	-0.0936349	0.323818	-0.289159	0.772459	NA
ENSG00000080189.10	SLC35C2	1275.08	0.0749294	0.174174	0.430198	0.667052	0.839079
ENSG00000080200.5	CRYBG3	170.461	0.646792	0.427647	1.51244	0.130421	0.352275
ENSG00000080224.13	EPHA6	14.4964	-0.254264	0.319816	-0.795033	0.426594	NA
ENSG00000080293.5	SCTR	0	NA	NA	NA	NA	NA
ENSG00000080298.11	RFX3	1005.47	0.196278	0.2286	0.85861	0.390556	0.642205
ENSG00000080345.13	RIF1	6044.18	0.150217	0.149138	1.00723	0.313823	0.574519
ENSG00000080371.4	RAB21	2678.09	-0.667722	0.259127	-2.57681	0.00997167	0.0724033
ENSG00000080493.9	SLC4A4	46.4517	0.0802938	0.419632	0.191343	0.848257	NA
ENSG00000080503.15	SMARCA2	16732.7	0.41883	0.207167	2.0217	0.0432069	0.182697
ENSG00000080511.2	RDH8	0	NA	NA	NA	NA	NA
ENSG00000080546.9	SESN1	1474.72	0.229768	0.27324	0.840902	0.400403	0.651632
ENSG00000080561.9	MID2	68.8917	0.691763	0.423141	1.63483	0.102085	NA
ENSG00000080572.8	PIH1D3	0	NA	NA	NA	NA	NA
ENSG00000080573.6	COL5A3	0	NA	NA	NA	NA	NA
ENSG00000080603.12	SRCAP	11239.9	0.0216577	0.106785	0.202815	0.83928	0.932174
ENSG00000080608.9	KIAA0020	1599.71	0.162197	0.196844	0.823988	0.409946	0.660216
ENSG00000080618.9	CPB2	0.765199	0.259655	0.246325	1.05411	NA	NA
ENSG00000080644.11	CHRNA3	5.52994	-0.129788	0.253199	-0.512594	0.608235	NA
ENSG00000080709.10	KCNN2	0.0277294	-0.0813338	0.215006	-0.378286	0.705218	NA
ENSG00000080802.14	CNOT4	1462.06	-0.0482537	0.184574	-0.261433	0.793758	0.908482
ENSG00000080815.14	PSEN1	3052.26	0.40086	0.167098	2.39896	0.0164419	0.0999349
ENSG00000080819.2	CPOX	457.854	0.480808	0.288019	1.66936	0.0950456	0.290888
ENSG00000080822.12	CLDND1	600.822	-0.515536	0.256131	-2.01278	0.0441379	0.185366
ENSG00000080823.17	MOK	294.013	-1.86423	0.385777	-4.83242	1.34887e-06	0.000141571
ENSG00000080824.14	HSP90AA1	20369.8	-0.16709	0.121606	-1.37403	0.169434	0.410743
ENSG00000080839.7	RBL1	802.657	0.0820759	0.24037	0.341457	0.73276	0.878038
ENSG00000080845.13	DLGAP4	1129.64	0.0499805	0.2102	0.237776	0.812055	0.918858
ENSG00000080854.10	IGSF9B	248.161	0.0706994	0.402201	0.175781	0.860466	0.942596
ENSG00000080910.7	CFHR2	0	NA	NA	NA	NA	NA
ENSG00000080947.10	CROCCP3	404.912	-0.198919	0.298334	-0.666766	0.504921	0.733947
ENSG00000080986.8	NDC80	128.957	-0.0791481	0.416415	-0.19007	0.849254	0.936809
ENSG00000081014.6	AP4E1	601.274	-0.113218	0.302483	-0.374294	0.708186	0.863466
ENSG00000081019.9	RSBN1	3653.66	-0.00590456	0.174514	-0.0338344	0.973009	0.987853
ENSG00000081026.14	MAGI3	237.53	-0.48799	0.365817	-1.33397	0.182213	0.428125
ENSG00000081041.8	CXCL2	1479.6	-0.298137	0.324346	-0.919192	0.357995	0.614057
ENSG00000081051.3	AFP	0	NA	NA	NA	NA	NA
ENSG00000081052.10	COL4A4	0.0289592	0.0853979	0.214975	0.397245	0.691187	NA
ENSG00000081059.15	TCF7	161.632	-0.343219	0.430251	-0.797717	0.425035	0.671183
ENSG00000081087.10	OSTM1	294.779	0.636249	0.336619	1.89011	0.0587427	0.219189
ENSG00000081138.9	CDH7	899.102	1.23515	0.360844	3.42294	0.000619468	0.0112201
ENSG00000081148.11	IMPG2	109.125	0.41857	0.425265	0.984256	0.32499	NA
ENSG00000081154.7	PCNP	1590.4	-0.420457	0.240455	-1.74859	0.0803623	0.263283
ENSG00000081177.14	EXD2	706.47	0.577792	0.250303	2.30837	0.0209785	0.115982
ENSG00000081181.3	ARG2	334.566	0.183817	0.341599	0.538109	0.590501	0.793764
ENSG00000081189.9	MEF2C	4441.61	0.588779	0.174569	3.37276	0.000744181	0.012605
ENSG00000081237.14	PTPRC	12520.4	-0.172522	0.143407	-1.20302	0.228967	0.488352
ENSG00000081248.6	CACNA1S	0	NA	NA	NA	NA	NA
ENSG00000081277.7	PKP1	3.86427	0.204698	0.252734	0.809933	0.417979	NA
ENSG00000081307.8	UBA5	966.928	-0.393907	0.236124	-1.66822	0.0952712	0.291113
ENSG00000081320.6	STK17B	8129.62	-1.4564	0.256859	-5.67005	1.42756e-08	5.59366e-06
ENSG00000081377.12	CDC14B	675.819	0.435456	0.281673	1.54596	0.122114	0.338389
ENSG00000081386.8	ZNF510	1466.4	0.293559	0.229228	1.28064	0.200321	0.452667
ENSG00000081479.8	LRP2	28.5734	0.22961	0.312654	0.734389	NA	NA
ENSG00000081665.9	ZNF506	954.566	0.0512907	0.239315	0.214323	0.830295	0.92753
ENSG00000081692.8	JMJD4	656.809	0.314579	0.262486	1.19846	0.230738	0.489589
ENSG00000081721.7	DUSP12	209.027	-0.479674	0.336773	-1.42432	0.154353	0.390714
ENSG00000081760.12	AACS	896.328	0.120261	0.247207	0.48648	0.626627	0.814371
ENSG00000081791.4	KIAA0141	2311.05	-0.246134	0.189982	-1.29557	0.195124	0.445549
ENSG00000081800.4	SLC13A1	0	NA	NA	NA	NA	NA
ENSG00000081803.11	CADPS2	227.424	0.852483	0.429104	1.98666	0.0469605	0.191741
ENSG00000081818.1	PCDHB4	1.96411	0.0225287	0.251564	0.0895547	NA	NA
ENSG00000081842.13	PCDHA6	2.29853	-0.275518	0.251573	-1.09518	0.273438	NA
ENSG00000081853.13	PCDHGA2	22.0276	0.544001	0.352506	1.54324	0.122773	NA
ENSG00000081870.7	HSPB11	653.462	-0.207133	0.258913	-0.800009	0.423706	0.670254
ENSG00000081913.9	PHLPP1	2284.89	-0.273102	0.191132	-1.42887	0.153042	0.38903
ENSG00000081923.6	ATP8B1	137.734	0.514268	0.426453	1.20592	0.227849	0.486976
ENSG00000081985.6	IL12RB2	2779.82	-0.0468264	0.218214	-0.21459	0.830087	0.92753
ENSG00000082014.12	SMARCD3	512.276	-0.282479	0.306187	-0.92257	0.356231	0.612386
ENSG00000082068.4	WDR70	817.949	0.0669749	0.221377	0.302537	0.762243	0.892353
ENSG00000082074.11	FYB	208.935	-0.158091	0.426122	-0.371	0.710637	0.865053
ENSG00000082126.13	MPP4	9.52358	0.215125	0.301072	0.714531	0.474899	NA
ENSG00000082146.8	STRADB	261.991	0.477307	0.391804	1.21823	0.223137	0.481811
ENSG00000082153.13	BZW1	2323.58	-0.770196	0.193761	-3.97498	7.03838e-05	0.00266891
ENSG00000082175.10	PGR	116.572	0.543995	0.356824	1.52455	0.127372	0.346748
ENSG00000082196.16	C1QTNF3	120.883	0.0140013	0.428466	0.0326776	0.973932	0.988184
ENSG00000082212.7	ME2	1886.95	0.169923	0.208734	0.814068	0.415606	0.664409
ENSG00000082213.13	C5orf22	617.442	0.639499	0.278963	2.29242	0.0218816	0.119692
ENSG00000082258.8	CCNT2	1900.59	-0.453193	0.264596	-1.71277	0.0867545	0.275261
ENSG00000082269.12	FAM135A	1374.75	0.159502	0.209649	0.760803	0.446775	0.688043
ENSG00000082293.8	COL19A1	0	NA	NA	NA	NA	NA
ENSG00000082397.11	EPB41L3	1313.9	-0.418106	0.27116	-1.54192	0.123094	0.339346
ENSG00000082438.11	COBLL1	644.136	-0.0150372	0.278198	-0.0540523	0.956893	0.982456
ENSG00000082458.7	DLG3	630.701	0.770156	0.275181	2.79873	0.00513048	0.0464393
ENSG00000082482.9	KCNK2	0	NA	NA	NA	NA	NA
ENSG00000082497.7	SERTAD4	0	NA	NA	NA	NA	NA
ENSG00000082512.10	TRAF5	1939.52	-0.0120101	0.184591	-0.0650634	0.948124	0.978679
ENSG00000082515.12	MRPL22	257.157	-0.427406	0.387755	-1.10226	0.270349	0.53171
ENSG00000082516.8	GEMIN5	1574.17	0.698491	0.278297	2.50988	0.0120774	0.0822962
ENSG00000082556.6	OPRK1	5.68589	-0.279599	0.253006	-1.10511	0.269114	NA
ENSG00000082641.11	NFE2L1	3084.06	-0.0287384	0.183869	-0.156298	0.875798	0.949571
ENSG00000082684.10	SEMA5B	8.39877	0.325422	0.268523	1.2119	NA	NA
ENSG00000082701.10	GSK3B	2950	-0.352252	0.186442	-1.88933	0.0588475	0.219325
ENSG00000082781.7	ITGB5	46.4084	0.33867	0.404214	0.837849	0.402116	NA
ENSG00000082805.15	ERC1	3942.66	0.001126	0.179869	0.0062601	0.995005	0.997544
ENSG00000082898.12	XPO1	4515.36	-0.0858446	0.151704	-0.565868	0.571483	0.781138
ENSG00000082929.4	C4orf6	0	NA	NA	NA	NA	NA
ENSG00000082996.15	RNF13	1032.68	0.649082	0.235596	2.75506	0.00586817	0.050833
ENSG00000083067.18	TRPM3	2.43798	0.275678	0.251744	1.09508	NA	NA
ENSG00000083093.5	PALB2	520.207	0.630051	0.286083	2.20233	0.0276418	0.13815
ENSG00000083097.10	DOPEY1	1790.69	0.23231	0.20782	1.11784	0.263635	0.524872
ENSG00000083099.6	LYRM2	670.742	-0.0905772	0.374599	-0.241798	0.808937	0.916581
ENSG00000083123.10	BCKDHB	566.623	0.18136	0.293264	0.618417	0.536301	0.756627
ENSG00000083168.5	KAT6A	12923	-0.543598	0.19264	-2.82184	0.00477489	0.0445297
ENSG00000083223.13	ZCCHC6	2520.61	0.000814574	0.173406	0.00469751	0.996252	0.998023
ENSG00000083290.15	ULK2	664.352	-0.204555	0.260432	-0.785444	0.432193	0.67703
ENSG00000083307.6	GRHL2	0	NA	NA	NA	NA	NA
ENSG00000083312.13	TNPO1	4101.93	-0.169463	0.183998	-0.921003	0.357049	0.613254
ENSG00000083444.12	PLOD1	562.589	0.162062	0.222344	0.728877	0.466077	0.704084
ENSG00000083454.17	P2RX5	33.8166	0.333266	0.380794	0.875187	0.381472	NA
ENSG00000083457.7	ITGAE	172.347	-0.404706	0.388908	-1.04062	0.298051	0.558608
ENSG00000083520.10	DIS3	1761.34	-0.586666	0.226073	-2.59503	0.00945819	0.0697935
ENSG00000083535.11	PIBF1	1000.22	-0.124661	0.24596	-0.506835	0.612271	0.806323
ENSG00000083544.9	TDRD3	719.758	-0.0298613	0.247028	-0.120882	0.903785	0.96212
ENSG00000083622.8	AC000111.6	0	NA	NA	NA	NA	NA
ENSG00000083635.7	NUFIP1	570.149	0.184243	0.307699	0.598776	0.549322	0.766534
ENSG00000083642.14	PDS5B	3949.05	-0.00116341	0.188738	-0.00616415	0.995082	0.997544
ENSG00000083720.8	OXCT1	912.007	0.00160465	0.278811	0.00575534	0.995408	0.9977
ENSG00000083750.8	RRAGB	525.597	0.107448	0.302498	0.355201	0.722439	0.872075
ENSG00000083782.3	EPYC	0	NA	NA	NA	NA	NA
ENSG00000083799.13	CYLD	4501.74	-0.70541	0.253591	-2.78169	0.00540773	0.048121
ENSG00000083807.5	SLC27A5	240.186	0.32596	0.362646	0.898836	0.36874	0.622868
ENSG00000083812.7	ZNF324	484.302	0.255912	0.297595	0.859933	0.389826	0.641613
ENSG00000083814.8	ZNF671	797.68	0.358947	0.277725	1.29245	0.1962	0.44698
ENSG00000083817.8	ZNF416	425.981	0.149234	0.303771	0.49127	0.623235	0.812727
ENSG00000083828.11	ZNF586	1104.39	-0.811037	0.207314	-3.91212	9.149e-05	0.00328254
ENSG00000083838.11	ZNF446	863.64	-5.80585e-05	0.187339	-0.000309911	0.999753	0.999855
ENSG00000083842.8	ZNF8	0	NA	NA	NA	NA	NA
ENSG00000083844.6	ZNF264	1633.09	-0.0481088	0.221676	-0.217023	0.82819	0.927193
ENSG00000083845.4	RPS5	10946.4	-0.123256	0.132634	-0.929291	0.352738	0.609878
ENSG00000083857.9	FAT1	29.5694	-0.237979	0.339124	-0.701747	0.482837	NA
ENSG00000083896.8	YTHDC1	6397.13	-0.410626	0.203366	-2.01915	0.043472	0.183488
ENSG00000083937.4	CHMP2B	1054.49	-0.48315	0.254607	-1.89763	0.0577448	0.217474
ENSG00000084070.7	SMAP2	2754.05	-0.0930196	0.193745	-0.480113	0.631147	0.816726
ENSG00000084072.12	PPIE	830.421	0.108561	0.272644	0.398177	0.6905	0.853245
ENSG00000084073.4	ZMPSTE24	404.318	-0.0935939	0.323218	-0.289569	0.772146	0.898132
ENSG00000084090.9	STARD7	4404.03	0.426071	0.212774	2.00246	0.0452354	0.18766
ENSG00000084092.6	NOA1	2008.69	0.00211034	0.196681	0.0107298	0.991439	0.996085
ENSG00000084093.11	REST	6238.23	-0.5801	0.202804	-2.8604	0.00423112	0.0410131
ENSG00000084110.6	HAL	38.3618	-0.0996648	0.409298	-0.243502	0.807617	NA
ENSG00000084112.10	SSH1	2861.89	-0.35214	0.217645	-1.61795	0.105672	0.310079
ENSG00000084207.11	GSTP1	2765.39	-0.136669	0.175791	-0.777452	0.436892	0.679771
ENSG00000084234.12	APLP2	20098.3	0.070701	0.103878	0.680614	0.496116	0.726709
ENSG00000084444.9	KIAA1467	690.134	0.0819582	0.306764	0.26717	0.789338	0.906209
ENSG00000084453.12	SLCO1A2	0.095299	-0.0193061	0.218601	-0.0883166	0.929625	NA
ENSG00000084463.3	WBP11	3437.29	-0.935637	0.224216	-4.17293	3.00704e-05	0.00141391
ENSG00000084623.7	EIF3I	2376.33	-0.551296	0.163781	-3.36606	0.000762508	0.01275
ENSG00000084628.5	NKAIN1	0	NA	NA	NA	NA	NA
ENSG00000084636.13	COL16A1	37.1936	0.0833144	0.40268	0.2069	0.836088	NA
ENSG00000084652.11	TXLNA	3844.99	0.403091	0.184751	2.1818	0.0291242	0.142707
ENSG00000084674.9	APOB	3.24407	0.181696	0.25251	0.719558	NA	NA
ENSG00000084676.11	NCOA1	3674.02	0.00537969	0.137438	0.0391428	0.968777	0.986909
ENSG00000084693.11	AGBL5	1216.81	-0.169638	0.186036	-0.911859	0.361843	0.616971
ENSG00000084710.9	EFR3B	14.2637	-0.121892	0.320316	-0.380538	0.703546	NA
ENSG00000084731.9	KIF3C	439.229	-0.432705	0.234834	-1.8426	0.065387	0.234051
ENSG00000084733.6	RAB10	2371.83	0.706215	0.255724	2.76163	0.00575129	0.050186
ENSG00000084734.4	GCKR	0	NA	NA	NA	NA	NA
ENSG00000084754.6	HADHA	8913.43	0.00987152	0.110409	0.089409	0.928757	0.970793
ENSG00000084764.6	MAPRE3	460.257	-0.160584	0.347049	-0.462711	0.643571	0.823884
ENSG00000084774.9	CAD	4281.6	0.380272	0.245841	1.54682	0.121906	0.338053
ENSG00000085063.10	CD59	2096.68	-0.177909	0.167426	-1.06261	0.287959	0.549791
ENSG00000085117.7	CD82	2599.03	-0.190711	0.229302	-0.831704	0.405576	0.656775
ENSG00000085185.11	BCORL1	1773.78	0.824611	0.24994	3.29923	0.000969491	0.0152358
ENSG00000085224.16	ATRX	7553.12	0.301915	0.190721	1.58302	0.113418	0.324307
ENSG00000085231.9	TAF9	830.872	-0.522467	0.242587	-2.15373	0.0312614	0.149381
ENSG00000085265.6	FCN1	6.1575	-0.280336	0.253222	-1.10708	0.268261	NA
ENSG00000085274.11	MYNN	926.722	-0.392461	0.215445	-1.82163	0.0685111	0.23926
ENSG00000085276.13	MECOM	4103.53	0.45255	0.153273	2.95257	0.00315144	0.0339553
ENSG00000085365.13	SCAMP1	668.471	-0.236021	0.246535	-0.957355	0.338388	0.596633
ENSG00000085377.9	PREP	1149.11	0.114508	0.210681	0.543515	0.586775	0.791531
ENSG00000085382.7	HACE1	902.581	0.337739	0.246646	1.36933	0.170896	0.412896
ENSG00000085415.11	SEH1L	1947.97	-0.207098	0.148842	-1.39139	0.164107	0.404249
ENSG00000085433.11	WDR47	796.85	-0.251347	0.258924	-0.970734	0.331681	0.59137
ENSG00000085449.10	WDFY1	1530.24	-0.107839	0.189534	-0.568973	0.569374	0.779615
ENSG00000085465.11	OVGP1	130.884	-0.822264	0.38209	-2.15202	0.0313961	0.149831
ENSG00000085491.11	SLC25A24	917.326	-0.184282	0.217851	-0.845911	0.397603	0.649051
ENSG00000085511.15	MAP3K4	1918.59	0.180331	0.195129	0.92416	0.355403	0.611699
ENSG00000085514.11	PILRA	59.0548	-0.684514	0.421491	-1.62403	0.104369	NA
ENSG00000085552.12	IGSF9	51.5478	0.2907	0.422885	0.687421	0.491817	NA
ENSG00000085563.10	ABCB1	3458.88	-0.111987	0.216995	-0.516081	0.605798	0.80228
ENSG00000085644.9	ZNF213	346.171	0.331305	0.337912	0.980449	0.326864	0.586644
ENSG00000085662.9	AKR1B1	811.755	-0.177332	0.246934	-0.718138	0.472672	0.710148
ENSG00000085719.7	CPNE3	2417.04	-0.220051	0.14553	-1.51206	0.130518	0.352455
ENSG00000085721.8	RRN3	1394.98	-0.203968	0.211956	-0.962312	0.335893	0.594552
ENSG00000085733.11	CTTN	91.096	0.297806	0.42875	0.694591	0.487312	NA
ENSG00000085741.8	WNT11	29.8966	0.614319	0.420928	1.45944	0.144445	NA
ENSG00000085760.10	MTIF2	884.033	0.0374896	0.253191	0.148069	0.882289	0.952369
ENSG00000085788.9	DDHD2	2856.67	-0.241396	0.12724	-1.89716	0.0578064	0.217474
ENSG00000085831.11	TTC39A	11.3749	-0.0431226	0.253748	-0.169942	NA	NA
ENSG00000085832.12	EPS15	6087.33	0.319153	0.118415	2.69522	0.00703431	0.0575824
ENSG00000085840.8	ORC1	313.264	0.209152	0.354586	0.589847	0.555293	0.771198
ENSG00000085871.4	MGST2	257.272	0.198651	0.401377	0.494923	0.620655	0.81118
ENSG00000085872.10	CHERP	2147.94	-0.108624	0.144696	-0.750702	0.452832	0.693556
ENSG00000085978.17	ATG16L1	1249.31	-0.72865	0.179143	-4.06743	4.75345e-05	0.00194693
ENSG00000085982.9	USP40	1277.17	0.80182	0.24865	3.22469	0.00126108	0.0184607
ENSG00000085998.9	POMGNT1	1083.5	-0.224263	0.259494	-0.864232	0.38746	0.639781
ENSG00000085999.7	RAD54L	126.442	0.327803	0.420473	0.779605	0.435623	0.679368
ENSG00000086015.16	MAST2	1278.1	-0.108532	0.197316	-0.550045	0.582289	0.78917
ENSG00000086061.11	DNAJA1	4169.45	0.501268	0.189675	2.64277	0.0082231	0.0641424
ENSG00000086062.8	B4GALT1	1671.37	-0.594244	0.185727	-3.19955	0.00137644	0.0195648
ENSG00000086065.9	CHMP5	1223.61	0.651021	0.162197	4.01377	5.97568e-05	0.00234147
ENSG00000086102.14	NFX1	2980.23	-0.0280947	0.130211	-0.215763	0.829172	0.927193
ENSG00000086159.8	AQP6	9.34157	-0.281286	0.253562	-1.10933	NA	NA
ENSG00000086189.5	DIMT1	577.534	0.320979	0.257548	1.24629	0.212659	0.46913
ENSG00000086200.12	IPO11	806.822	0.116168	0.259341	0.447936	0.6542	0.831274
ENSG00000086205.12	FOLH1	45.1954	0.317167	0.39535	0.802245	0.422411	NA
ENSG00000086232.8	EIF2AK1	3505.65	-0.0427608	0.176999	-0.241587	0.8091	0.916632
ENSG00000086288.7	NME8	96.7563	0.0650291	0.430189	0.151164	0.879846	NA
ENSG00000086289.7	EPDR1	556.665	0.539161	0.427786	1.26035	0.207543	0.462327
ENSG00000086300.11	SNX10	616.469	0.110459	0.267392	0.413097	0.679536	0.846859
ENSG00000086475.10	SEPHS1	1069	0.120956	0.150877	0.801687	0.422734	0.669519
ENSG00000086504.11	MRPL28	316.935	-0.112186	0.283791	-0.395311	0.692613	0.854568
ENSG00000086506.2	HBQ1	8.53557	-0.144516	0.253547	-0.569975	0.568695	NA
ENSG00000086544.2	ITPKC	641.886	-0.354983	0.275138	-1.2902	0.196981	0.447952
ENSG00000086548.8	CEACAM6	0	NA	NA	NA	NA	NA
ENSG00000086570.8	FAT2	1.9936	-0.262917	0.251395	-1.04583	NA	NA
ENSG00000086589.7	RBM22	2719.28	-0.0481239	0.182379	-0.263867	0.791883	0.9078
ENSG00000086598.6	TMED2	3897.69	-0.619429	0.172032	-3.60066	0.000317407	0.00743251
ENSG00000086619.9	ERO1LB	742.943	-0.360005	0.278608	-1.29216	0.196303	0.447068
ENSG00000086666.14	ZFAND6	2027.35	-0.234606	0.142954	-1.64114	0.100769	0.301793
ENSG00000086696.6	HSD17B2	0	NA	NA	NA	NA	NA
ENSG00000086712.8	TXLNG	1223.33	-0.245014	0.234264	-1.04589	0.295613	0.556234
ENSG00000086717.14	PPEF1	0	NA	NA	NA	NA	NA
ENSG00000086730.12	LAT2	2658.83	-0.243523	0.19519	-1.24762	0.212171	0.468635
ENSG00000086758.11	HUWE1	31552.5	0.0758696	0.0829562	0.914575	0.360415	0.616068
ENSG00000086827.4	ZW10	514.096	0.337926	0.234057	1.44378	0.148802	0.38183
ENSG00000086848.10	ALG9	299.424	-0.355202	0.288178	-1.23258	0.217733	0.47547
ENSG00000086967.9	MYBPC2	33.6601	-0.450698	0.345323	-1.30515	0.191842	NA
ENSG00000086991.8	NOX4	0	NA	NA	NA	NA	NA
ENSG00000087008.11	ACOX3	555.218	0.243562	0.330209	0.737601	0.460757	0.700286
ENSG00000087053.14	MTMR2	910.148	-0.0455863	0.24837	-0.183542	0.854373	0.938875
ENSG00000087074.7	PPP1R15A	27534.8	-0.395308	0.233541	-1.69267	0.0905186	0.282091
ENSG00000087076.4	HSD17B14	117.862	0.13276	0.42997	0.308766	0.757499	0.890456
ENSG00000087077.7	TRIP6	1374.08	0.260361	0.193615	1.34473	0.178711	0.423965
ENSG00000087085.9	ACHE	11.7105	0.281567	0.253665	1.10999	0.267002	NA
ENSG00000087086.9	FTL	5743.3	-0.262924	0.152167	-1.72787	0.0840124	0.269923
ENSG00000087087.14	SRRT	4969.14	-0.483701	0.139961	-3.45596	0.000548336	0.0104468
ENSG00000087088.15	BAX	426.061	-0.0284119	0.335094	-0.0847878	0.93243	0.97255
ENSG00000087095.8	NLK	1363.57	0.3876	0.246929	1.56968	0.116489	0.329019
ENSG00000087111.16	PIGS	789.708	0.0673674	0.218101	0.308882	0.757411	0.890456
ENSG00000087116.9	ADAMTS2	1.01053	-0.050304	0.24923	-0.201838	0.840043	NA
ENSG00000087128.5	TMPRSS11E	0	NA	NA	NA	NA	NA
ENSG00000087152.11	ATXN7L3	1865.91	-0.271292	0.175421	-1.54652	0.121979	0.338095
ENSG00000087157.14	PGS1	1184.04	-0.630273	0.23354	-2.69877	0.00695954	0.0571234
ENSG00000087191.8	PSMC5	1733.18	0.0104991	0.185598	0.0565689	0.954889	0.982212
ENSG00000087206.12	UIMC1	2310.58	-0.548628	0.182335	-3.0089	0.00262195	0.0301871
ENSG00000087237.6	CETP	11.9383	-0.0487893	0.281141	-0.17354	0.862227	NA
ENSG00000087245.8	MMP2	2347.01	-0.223451	0.287921	-0.776086	0.437698	0.680395
ENSG00000087250.4	MT3	0	NA	NA	NA	NA	NA
ENSG00000087253.7	LPCAT2	2070.81	0.498224	0.206493	2.41278	0.0158312	0.0973304
ENSG00000087258.9	GNAO1	10.1739	-0.0526453	0.253662	-0.207541	0.835587	NA
ENSG00000087263.12	OGFOD1	1650.17	0.305123	0.176097	1.7327	0.0831496	0.268155
ENSG00000087266.11	SH3BP2	2546.79	-0.062054	0.180232	-0.344299	0.730621	0.876641
ENSG00000087269.11	NOP14	3032.45	-0.0904765	0.143599	-0.630064	0.528653	0.75161
ENSG00000087274.12	ADD1	8310.31	0.175378	0.114237	1.53521	0.124731	0.341661
ENSG00000087299.7	L2HGDH	107.543	-0.0685443	0.419963	-0.163215	0.870349	NA
ENSG00000087301.4	TXNDC16	601.113	0.0106702	0.249966	0.0426868	0.965951	0.985998
ENSG00000087302.4	C14orf166	2973.63	-0.555202	0.135589	-4.09475	4.22633e-05	0.00178707
ENSG00000087303.12	NID2	38.5673	-0.213974	0.368889	-0.58005	0.561881	NA
ENSG00000087338.4	GMCL1	622.366	0.00305466	0.254768	0.01199	0.990434	0.995769
ENSG00000087365.10	SF3B2	9612.76	-0.223463	0.118036	-1.89318	0.0583342	0.218312
ENSG00000087448.5	KLHL42	1229.77	-0.182598	0.177196	-1.03048	0.302783	0.5629
ENSG00000087460.19	GNAS	14716	-0.291087	0.152817	-1.90481	0.0568046	0.215762
ENSG00000087470.13	DNM1L	1724.74	0.03228	0.223408	0.144489	0.885114	0.954157
ENSG00000087494.11	PTHLH	0	NA	NA	NA	NA	NA
ENSG00000087495.12	PHACTR3	0	NA	NA	NA	NA	NA
ENSG00000087502.13	ERGIC2	705.041	-0.187939	0.221123	-0.849928	0.395365	0.646926
ENSG00000087510.5	TFAP2C	0	NA	NA	NA	NA	NA
ENSG00000087586.13	AURKA	86.0312	0.188249	0.430225	0.437559	0.661706	NA
ENSG00000087589.12	CASS4	366.868	1.25386	0.353587	3.54611	0.000390963	0.00854233
ENSG00000087842.6	PIR	164.47	0.273854	0.393125	0.696609	0.486048	0.718859
ENSG00000087884.10	AAMDC	92.7972	0.390906	0.429923	0.909247	0.36322	NA
ENSG00000087903.8	RFX2	658.904	-1.38041	0.381543	-3.61797	0.000296923	0.00715232
ENSG00000087916.7	SLC6A14	0	NA	NA	NA	NA	NA
ENSG00000087995.11	METTL2A	253.415	0.0292439	0.399936	0.0731214	0.941709	0.975742
ENSG00000088002.7	SULT2B1	0	NA	NA	NA	NA	NA
ENSG00000088035.11	ALG6	178.127	0.0808047	0.423776	0.190678	0.848778	0.936809
ENSG00000088038.13	CNOT3	2299.88	-0.186384	0.16329	-1.14143	0.25369	0.513742
ENSG00000088053.7	GP6	12.8341	0.0290424	0.341242	0.0851079	0.932176	NA
ENSG00000088179.4	PTPN4	1294.17	0.475762	0.219299	2.16947	0.0300469	0.146132
ENSG00000088205.8	DDX18	2487.48	-0.372846	0.178438	-2.0895	0.0366628	0.164997
ENSG00000088247.11	KHSRP	9261.06	-0.432289	0.117838	-3.66849	0.00024399	0.00628575
ENSG00000088256.4	GNA11	597.989	-0.0553867	0.31027	-0.178512	0.858321	0.941469
ENSG00000088280.14	ASAP3	116.258	0.246156	0.430161	0.572242	0.567158	0.777486
ENSG00000088298.8	EDEM2	665.237	0.0175553	0.26099	0.0672643	0.946371	0.977819
ENSG00000088305.14	DNMT3B	1695.46	0.281524	0.214337	1.31347	0.189026	0.437401
ENSG00000088320.3	REM1	0	NA	NA	NA	NA	NA
ENSG00000088325.11	TPX2	671.435	0.00725701	0.314008	0.0231109	0.981562	0.991515
ENSG00000088340.11	FER1L4	80.0825	-0.024183	0.430205	-0.0562127	0.955172	NA
ENSG00000088356.4	PDRG1	308.339	-0.178093	0.391199	-0.45525	0.648929	0.827164
ENSG00000088367.16	EPB41L1	248.898	0.241243	0.397544	0.606833	0.543962	0.763495
ENSG00000088386.11	SLC15A1	0	NA	NA	NA	NA	NA
ENSG00000088387.13	DOCK9	54.7216	0.148889	0.380192	0.391617	0.695341	NA
ENSG00000088448.10	ANKRD10	3111.47	-0.437835	0.152199	-2.87673	0.00401821	0.0397479
ENSG00000088451.6	TGDS	102.992	0.693657	0.425226	1.63127	0.102834	NA
ENSG00000088538.12	DOCK3	859.821	0.363651	0.296999	1.22442	0.220795	0.478688
ENSG00000088543.10	C3orf18	213.439	0.821963	0.34429	2.38742	0.0169673	0.101836
ENSG00000088682.9	COQ9	651.379	0.43306	0.377712	1.14654	0.251574	0.511281
ENSG00000088726.11	TMEM40	2.46792	-0.27562	0.251713	-1.09497	NA	NA
ENSG00000088727.8	KIF9	698.498	-0.135269	0.287862	-0.469909	0.63842	0.820814
ENSG00000088756.8	ARHGAP28	4.65172	0.279268	0.252921	1.10417	0.269519	NA
ENSG00000088766.7	CRLS1	517.567	0.477732	0.322416	1.48172	0.138413	0.365137
ENSG00000088782.4	DEFB127	0	NA	NA	NA	NA	NA
ENSG00000088808.12	PPP1R13B	77.8591	-0.129119	0.429373	-0.300715	0.763631	NA
ENSG00000088812.13	ATRN	1948.45	0.437775	0.222612	1.96654	0.0492363	0.196861
ENSG00000088826.13	SMOX	737.97	-1.30446	0.392977	-3.31942	0.000902042	0.0145853
ENSG00000088827.8	SIGLEC1	0.499129	-0.251344	0.243261	-1.03323	NA	NA
ENSG00000088832.10	FKBP1A	2269.71	-0.413963	0.140253	-2.95154	0.00316193	0.0340371
ENSG00000088833.13	NSFL1C	2299.03	-0.34299	0.197892	-1.73322	0.0830571	0.26793
ENSG00000088836.8	SLC4A11	7.69646	0.200911	0.253483	0.792602	0.42801	NA
ENSG00000088854.11	C20orf194	1474.27	0.251516	0.198736	1.26558	0.205664	0.459792
ENSG00000088876.7	ZNF343	338.14	0.821257	0.334672	2.45392	0.014131	0.0908699
ENSG00000088881.16	EBF4	89.4853	0.0110806	0.417675	0.0265292	0.978835	NA
ENSG00000088882.7	CPXM1	4098.61	-0.473108	0.130487	-3.62572	0.000288163	0.00705698
ENSG00000088888.13	MAVS	1417	0.200973	0.218453	0.919983	0.357582	0.613721
ENSG00000088899.10	LZTS3	1595.44	-0.497871	0.247457	-2.01195	0.0442249	0.185556
ENSG00000088926.9	F11	0	NA	NA	NA	NA	NA
ENSG00000088930.6	XRN2	4070.09	-0.227426	0.128003	-1.77672	0.0756142	0.253428
ENSG00000088970.11	PLK1S1	1094.98	0.0696287	0.243561	0.285878	0.774972	0.899289
ENSG00000088986.6	DYNLL1	792.558	0.48511	0.339937	1.42706	0.153562	0.389708
ENSG00000088992.13	TESC	17.754	-0.0607749	0.298031	-0.203922	0.838415	NA
ENSG00000089006.12	SNX5	2173.37	0.376976	0.179188	2.1038	0.0353961	0.161337
ENSG00000089009.11	RPL6	17338.6	-0.199786	0.131223	-1.52249	0.127887	0.347517
ENSG00000089012.10	SIRPG	0.145453	-0.201232	0.223938	-0.898606	0.368863	NA
ENSG00000089022.9	MAPKAPK5	1931.08	-0.387109	0.178584	-2.16765	0.0301853	0.146441
ENSG00000089041.12	P2RX7	713.553	0.529615	0.241653	2.19164	0.0284056	0.141009
ENSG00000089048.10	ESF1	776.724	0.223906	0.227117	0.985859	0.324202	0.585227
ENSG00000089050.10	RBBP9	300.981	0.227959	0.342587	0.665405	0.505792	0.734222
ENSG00000089053.8	ANAPC5	3834.31	0.0306627	0.150777	0.203365	0.83885	0.931923
ENSG00000089057.10	SLC23A2	2997.23	0.0423511	0.14866	0.284885	0.775732	0.899639
ENSG00000089060.7	SLC8B1	1043.06	0.176194	0.259927	0.677859	0.497861	0.727792
ENSG00000089063.10	TMEM230	860.085	0.184581	0.224556	0.821981	0.411088	0.661362
ENSG00000089091.12	DZANK1	164.777	0.0666618	0.395512	0.168546	0.866154	0.944844
ENSG00000089094.12	KDM2B	2604.4	0.157056	0.125691	1.24954	0.211468	0.467762
ENSG00000089101.13	C20orf26	0	NA	NA	NA	NA	NA
ENSG00000089116.3	LHX5	0	NA	NA	NA	NA	NA
ENSG00000089123.11	TASP1	417.622	0.00928756	0.29683	0.0312892	0.975039	0.988664
ENSG00000089127.8	OAS1	366.199	0.780443	0.328042	2.3791	0.0173552	0.10297
ENSG00000089154.6	GCN1L1	7143.97	-0.0611453	0.146649	-0.41695	0.676715	0.844906
ENSG00000089157.11	RPLP0	55963.8	-0.193056	0.13824	-1.39653	0.162554	0.402788
ENSG00000089159.11	PXN	1864.69	0.100339	0.175872	0.570525	0.568322	0.778662
ENSG00000089163.4	SIRT4	5.41534	0.0818083	0.253225	0.323066	0.746645	NA
ENSG00000089169.10	RPH3A	1.53373	0.145276	0.310928	0.467235	NA	NA
ENSG00000089177.13	KIF16B	1252.36	0.347742	0.210421	1.6526	0.0984122	0.297007
ENSG00000089195.10	TRMT6	436.344	0.660912	0.366384	1.80388	0.0712504	0.24509
ENSG00000089199.5	CHGB	18.661	0.0985547	0.302547	0.32575	NA	NA
ENSG00000089220.4	PEBP1	3275.09	-0.377958	0.141421	-2.67258	0.00752705	0.0601908
ENSG00000089225.15	TBX5	0	NA	NA	NA	NA	NA
ENSG00000089234.11	BRAP	1641.79	-0.306613	0.269735	-1.13672	0.255656	0.516275
ENSG00000089248.6	ERP29	3027.64	0.150364	0.188794	0.796447	0.425773	0.671987
ENSG00000089250.14	NOS1	0.0277294	-0.0813338	0.215006	-0.378286	0.705218	NA
ENSG00000089280.14	FUS	8574.4	0.166912	0.109492	1.52441	0.127405	0.346758
ENSG00000089289.11	IGBP1	3967.98	-0.183429	0.150423	-1.21942	0.222683	0.481285
ENSG00000089327.10	FXYD5	7187.55	-0.277187	0.153253	-1.80869	0.0704995	0.243885
ENSG00000089335.16	ZNF302	1136.88	0.684695	0.241608	2.83391	0.00459827	0.0436613
ENSG00000089351.10	GRAMD1A	3282.44	-0.251332	0.20183	-1.24527	0.213034	0.46913
ENSG00000089356.12	FXYD3	9.42848	0.144071	0.289282	0.498029	0.618464	NA
ENSG00000089472.12	HEPH	0.801065	0.260611	0.24666	1.05656	NA	NA
ENSG00000089486.12	CDIP1	986.775	0.253922	0.214463	1.18399	0.236418	0.49547
ENSG00000089505.13	CMTM1	79.6809	0.021977	0.424236	0.0518036	0.958685	NA
ENSG00000089558.4	KCNH4	5.34943	-0.0200548	0.253207	-0.079203	0.936871	NA
ENSG00000089597.12	GANAB	7583.49	-0.10731	0.13983	-0.767431	0.442825	0.685283
ENSG00000089639.6	GMIP	1516.39	-0.378767	0.20754	-1.82503	0.0679965	0.238721
ENSG00000089682.12	RBM41	739.181	0.212953	0.230038	0.925729	0.354587	0.611168
ENSG00000089685.10	BIRC5	189.833	-0.100264	0.398348	-0.2517	0.801273	0.912071
ENSG00000089692.4	LAG3	297.289	0.00814465	0.323644	0.0251655	0.979923	0.990711
ENSG00000089693.6	MLF2	2294.57	-0.472635	0.185198	-2.55205	0.0107092	0.0759724
ENSG00000089723.5	OTUB2	44.7721	0.764997	0.399857	1.91318	0.0557256	NA
ENSG00000089737.11	DDX24	7950.27	-0.270754	0.172739	-1.56742	0.117017	0.329946
ENSG00000089775.7	ZBTB25	855.455	0.110569	0.208451	0.530432	0.595813	0.79688
ENSG00000089818.12	NECAP1	784.019	-0.920618	0.280238	-3.28513	0.00101937	0.0158083
ENSG00000089820.11	ARHGAP4	3427.96	-0.325221	0.0992061	-3.27824	0.00104458	0.016051
ENSG00000089847.8	ANKRD24	39.0107	0.346681	0.420669	0.824118	0.409873	NA
ENSG00000089876.7	DHX32	860.841	0.450735	0.254237	1.77289	0.0762465	0.254914
ENSG00000089902.8	RCOR1	1721.21	-0.348352	0.20117	-1.73163	0.083339	0.268692
ENSG00000089916.13	GPATCH2L	5656.49	-0.367382	0.192957	-1.90396	0.0569156	0.216029
ENSG00000090006.13	LTBP4	3713.76	0.333096	0.187059	1.7807	0.0749622	0.252415
ENSG00000090013.5	BLVRB	205.148	-0.0463318	0.376265	-0.123136	0.901999	0.961016
ENSG00000090020.6	SLC9A1	645.508	0.767349	0.240696	3.18805	0.00143238	0.0200832
ENSG00000090054.9	SPTLC1	804.1	0.245417	0.256498	0.956798	0.338669	0.596901
ENSG00000090060.13	PAPOLA	5016.1	-0.227233	0.141652	-1.60416	0.108678	0.315239
ENSG00000090061.13	CCNK	1897.8	-0.558592	0.215112	-2.59676	0.0094109	0.0695756
ENSG00000090097.16	PCBP4	134.864	0.580305	0.358973	1.61657	0.105971	0.310567
ENSG00000090104.7	RGS1	1106.72	-1.01815	0.425212	-2.39446	0.0166449	0.100648
ENSG00000090238.7	YPEL3	1444.87	-0.352052	0.200086	-1.7595	0.0784926	0.260159
ENSG00000090263.11	MRPS33	410.392	0.76657	0.331265	2.31407	0.0206639	0.115066
ENSG00000090266.8	NDUFB2	274.859	-0.0163357	0.297704	-0.0548721	0.95624	0.982428
ENSG00000090273.9	NUDC	1051.03	-0.699641	0.229973	-3.04228	0.00234796	0.0279921
ENSG00000090316.11	MAEA	1239.59	0.0977337	0.202607	0.48238	0.629536	0.81585
ENSG00000090339.4	ICAM1	276.759	0.499766	0.340991	1.46563	0.14275	0.372084
ENSG00000090372.10	STRN4	2331.83	-0.545472	0.165658	-3.29277	0.000992053	0.0155249
ENSG00000090376.4	IRAK3	5273.55	-0.432897	0.180573	-2.39735	0.016514	0.100218
ENSG00000090382.2	LYZ	308.397	-0.0669752	0.387391	-0.172888	0.86274	0.943308
ENSG00000090402.3	SI	0	NA	NA	NA	NA	NA
ENSG00000090432.5	MUL1	776.485	-1.16593	0.255693	-4.55989	5.11812e-06	0.000384292
ENSG00000090447.7	TFAP4	830.112	0.778408	0.274826	2.83236	0.00462056	0.0436964
ENSG00000090470.10	PDCD7	1573.5	0.00373253	0.182345	0.0204696	0.983669	0.992449
ENSG00000090487.6	SPG21	899.981	0.0385844	0.293265	0.131569	0.895326	0.957776
ENSG00000090512.7	FETUB	0	NA	NA	NA	NA	NA
ENSG00000090520.6	DNAJB11	1413.45	-0.700082	0.236775	-2.95675	0.00310904	0.0336216
ENSG00000090530.5	LEPREL1	1.64518	0.271365	0.250335	1.08401	NA	NA
ENSG00000090534.13	THPO	0	NA	NA	NA	NA	NA
ENSG00000090539.11	CHRD	0	NA	NA	NA	NA	NA
ENSG00000090554.8	FLT3LG	8.06517	0.217442	0.253498	0.857768	NA	NA
ENSG00000090565.11	RAB11FIP3	1844.19	0.152067	0.168917	0.900245	0.36799	0.622227
ENSG00000090581.5	GNPTG	411.31	-0.380174	0.299117	-1.27099	0.203733	0.457387
ENSG00000090612.16	ZNF268	1464.04	0.0154979	0.22952	0.0675234	0.946165	0.977819
ENSG00000090615.8	GOLGA3	3329.26	0.0306422	0.162098	0.189035	0.850065	0.937104
ENSG00000090621.9	PABPC4	7624.77	-0.149729	0.146072	-1.02503	0.305347	0.565966
ENSG00000090659.13	CD209	2.38498	0.275516	0.25169	1.09467	NA	NA
ENSG00000090661.7	CERS4	602.826	0.0539875	0.311892	0.173097	0.862575	0.943304
ENSG00000090674.11	MCOLN1	265.538	0.171439	0.335189	0.511471	0.609021	0.804297
ENSG00000090686.11	USP48	2516.29	0.220548	0.198877	1.10896	0.267445	0.528999
ENSG00000090776.5	EFNB1	489.385	-0.132578	0.344828	-0.384477	0.700625	0.859514
ENSG00000090857.9	PDPR	3495.02	-0.0105648	0.217338	-0.0486099	0.96123	0.983484
ENSG00000090861.11	AARS	2836.12	1.00794	0.272917	3.6932	0.000221451	0.00592975
ENSG00000090863.7	GLG1	3899.41	0.191707	0.211203	0.907692	0.364041	0.619112
ENSG00000090889.10	KIF4A	170.931	0.32799	0.430224	0.76237	0.445839	0.687413
ENSG00000090905.13	TNRC6A	3997.96	0.0645987	0.17803	0.362853	0.716715	0.868466
ENSG00000090920.9	FCGBP	4.07303	-0.278502	0.252664	-1.10227	NA	NA
ENSG00000090924.10	PLEKHG2	1175.61	-0.41514	0.262061	-1.58414	0.113162	0.323733
ENSG00000090932.6	DLL3	4.32349	0.237638	0.252861	0.939798	0.347321	NA
ENSG00000090971.4	NAT14	200.166	0.0692965	0.394841	0.175505	0.860683	0.942725
ENSG00000090975.8	PITPNM2	2278.19	0.0153695	0.141767	0.108414	0.913667	0.964882
ENSG00000090989.13	EXOC1	1476.64	0.389583	0.187832	2.07411	0.0380694	0.168998
ENSG00000091009.6	RBM27	3709.44	-0.503962	0.223275	-2.25714	0.0239996	0.126679
ENSG00000091010.4	POU4F3	0	NA	NA	NA	NA	NA
ENSG00000091039.12	OSBPL8	5480.49	-0.134759	0.166493	-0.809396	0.418287	0.666117
ENSG00000091073.15	DTX2	291.11	0.226198	0.386979	0.584524	0.558868	0.772983
ENSG00000091106.14	NLRC4	7.45499	-0.28087	0.253415	-1.10834	NA	NA
ENSG00000091127.9	PUS7	626.225	0.487566	0.301315	1.61813	0.105636	0.310079
ENSG00000091128.8	LAMB4	2.92531	-0.276676	0.252063	-1.09765	NA	NA
ENSG00000091129.15	NRCAM	0	NA	NA	NA	NA	NA
ENSG00000091136.9	LAMB1	16.6797	0.202299	0.350162	0.57773	0.563447	NA
ENSG00000091137.7	SLC26A4	11.3256	-0.134755	0.280423	-0.480541	0.630843	NA
ENSG00000091138.8	SLC26A3	0.0312432	-0.0864513	0.215062	-0.401983	0.687697	NA
ENSG00000091140.8	DLD	1932.14	-1.06092	0.201384	-5.26816	1.37796e-07	2.83447e-05
ENSG00000091157.9	WDR7	1469.06	0.473229	0.19134	2.47323	0.0133896	0.0875877
ENSG00000091164.8	TXNL1	1654.6	-0.294952	0.144495	-2.04126	0.041225	0.178162
ENSG00000091181.15	IL5RA	0.697585	-0.2593	0.245714	-1.05529	0.291292	NA
ENSG00000091262.10	ABCC6	146.594	0.208171	0.381538	0.545611	0.585333	0.790964
ENSG00000091317.7	CMTM6	1525.89	-0.608435	0.178415	-3.41023	0.000649082	0.0115256
ENSG00000091409.10	ITGA6	2818.28	0.811475	0.283233	2.86505	0.00416948	0.040674
ENSG00000091428.13	RAPGEF4	1.88056	-0.27318	0.250901	-1.0888	NA	NA
ENSG00000091436.12	MLTK	1794.45	-0.0676636	0.147236	-0.45956	0.645832	0.825424
ENSG00000091482.5	SMPX	0	NA	NA	NA	NA	NA
ENSG00000091483.6	FH	584.2	0.545734	0.282584	1.93123	0.0534543	0.20725
ENSG00000091490.6	SEL1L3	1319.81	0.0724669	0.217424	0.333297	0.73891	0.88119
ENSG00000091513.10	TF	11.4651	0.0515813	0.272128	0.189548	NA	NA
ENSG00000091527.11	CDV3	5369.22	-0.341668	0.174819	-1.95441	0.0506527	0.200209
ENSG00000091536.12	MYO15A	139.451	0.0105992	0.419894	0.0252426	0.979861	0.990711
ENSG00000091542.8	ALKBH5	3255.8	-0.24132	0.183788	-1.31303	0.189171	0.437523
ENSG00000091583.6	APOH	0	NA	NA	NA	NA	NA
ENSG00000091592.11	NLRP1	5127.25	-0.450122	0.207947	-2.1646	0.0304184	0.146893
ENSG00000091622.11	PITPNM3	86.4967	-0.17776	0.421475	-0.421757	0.673202	NA
ENSG00000091640.3	SPAG7	792.37	-0.628896	0.252093	-2.4947	0.0126064	0.0844861
ENSG00000091651.4	ORC6	131.706	-0.0732907	0.390773	-0.187553	0.851227	0.937346
ENSG00000091656.11	ZFHX4	0	NA	NA	NA	NA	NA
ENSG00000091664.7	SLC17A6	0	NA	NA	NA	NA	NA
ENSG00000091704.5	CPA1	0	NA	NA	NA	NA	NA
ENSG00000091732.11	ZC3HC1	408.438	0.0612064	0.300943	0.203382	0.838836	0.931923
ENSG00000091831.17	ESR1	289.249	0.355165	0.375695	0.945356	0.344477	0.602203
ENSG00000091844.3	RGS17	3.12321	0.277275	0.252279	1.09908	NA	NA
ENSG00000091879.9	ANGPT2	12.2361	0.212056	0.309501	0.685154	0.493247	NA
ENSG00000091947.5	TMEM101	522.998	-0.0283503	0.288879	-0.0981391	0.921822	0.968089
ENSG00000091972.14	CD200	1012.28	0.47402	0.278296	1.70329	0.0885135	0.277705
ENSG00000091986.11	CCDC80	35.7646	0.508073	0.401486	1.26548	0.205699	NA
ENSG00000092009.6	CMA1	1.16599	0.268046	0.249182	1.0757	NA	NA
ENSG00000092010.10	PSME1	8215.98	-0.0418375	0.138957	-0.301083	0.763351	0.893033
ENSG00000092020.6	PPP2R3C	783.909	-0.272097	0.225823	-1.20491	0.228237	0.487539
ENSG00000092036.12	HAUS4	375.754	0.0739658	0.308166	0.240019	0.810316	0.917655
ENSG00000092051.12	JPH4	65.8391	0.24041	0.427943	0.561781	0.574265	NA
ENSG00000092054.12	MYH7	0	NA	NA	NA	NA	NA
ENSG00000092067.5	CEBPE	4.33141	-0.278746	0.252734	-1.10293	NA	NA
ENSG00000092068.14	SLC7A8	378.855	0.415357	0.337667	1.23008	0.218668	0.476496
ENSG00000092094.6	OSGEP	1019.96	0.438474	0.215561	2.0341	0.0419412	0.179939
ENSG00000092096.10	SLC22A17	935.32	0.717085	0.263366	2.72276	0.00647383	0.0544628
ENSG00000092098.12	RNF31	766.886	0.149056	0.294476	0.506176	0.612733	0.806571
ENSG00000092108.16	SCFD1	1539.74	-0.295404	0.203647	-1.45057	0.146899	0.379015
ENSG00000092140.10	G2E3	704.207	-0.251781	0.262077	-0.960714	0.336696	0.595257
ENSG00000092148.8	HECTD1	9840.08	-0.35073	0.134618	-2.60538	0.00917732	0.0687043
ENSG00000092199.13	HNRNPC	12407.1	-0.301261	0.111433	-2.70351	0.00686104	0.0565976
ENSG00000092200.8	RPGRIP1	2.94414	0.277069	0.252205	1.09859	NA	NA
ENSG00000092201.5	SUPT16H	5456.43	0.107424	0.120831	0.889048	0.373977	0.627656
ENSG00000092203.9	TOX4	2447.88	-0.744584	0.19923	-3.73731	0.000185997	0.00531969
ENSG00000092208.12	GEMIN2	129.361	0.410605	0.420157	0.977264	0.328438	0.588356
ENSG00000092295.7	TGM1	44.7883	0.167908	0.389342	0.431262	0.666278	NA
ENSG00000092330.11	TINF2	1427.96	-0.0615414	0.206996	-0.297307	0.766232	0.894445
ENSG00000092345.9	DAZL	0	NA	NA	NA	NA	NA
ENSG00000092377.9	TBL1Y	0	NA	NA	NA	NA	NA
ENSG00000092421.12	SEMA6A	20.6461	0.0424175	0.317005	0.133807	0.893555	NA
ENSG00000092439.9	TRPM7	4318.98	0.144638	0.155185	0.932036	0.351318	0.608842
ENSG00000092445.7	TYRO3	127.583	0.526575	0.424706	1.23986	0.215029	0.471916
ENSG00000092470.7	WDR76	509.182	-0.00478214	0.345272	-0.0138504	0.988949	0.995385
ENSG00000092529.18	CAPN3	97.5288	0.54599	0.42764	1.27675	0.201689	NA
ENSG00000092531.5	SNAP23	2324.43	0.4459	0.148837	2.99589	0.00273649	0.0307234
ENSG00000092607.9	TBX15	4.30357	-0.278967	0.252806	-1.10348	0.269818	NA
ENSG00000092621.7	PHGDH	1116.56	-0.216935	0.28745	-0.754687	0.450437	0.691419
ENSG00000092758.11	COL9A3	34.801	0.234602	0.425332	0.551574	0.58124	NA
ENSG00000092820.13	EZR	3214.98	-1.33637	0.27218	-4.90988	9.11312e-07	0.000104964
[truncated: 55,256 more rows]

## Sheet: All Results KLF6
EnsemblID	GeneSym	baseMean	log2FoldChange	lfcSE	stat	pvalue	padj
ENSG00000000003.10	TSPAN6	0.138426	0.907324	1.21929	0.744142	0.45679	NA
ENSG00000000005.5	TNMD	0.138426	0.907324	1.21929	0.744142	0.45679	NA
ENSG00000000419.8	DPM1	3337.71	0.333122	0.0621061	5.36376	8.15063e-08	2.91143e-07
ENSG00000000457.9	SCYL3	875.073	0.0335584	0.0744056	0.45102	0.651975	0.73633
ENSG00000000460.12	C1orf112	2319.52	0.31568	0.0581207	5.43145	5.58971e-08	2.01342e-07
ENSG00000000938.8	FGR	413.073	6.71465	0.265237	25.3156	2.14949e-141	7.4603e-140
ENSG00000000971.11	CFH	2633.78	-9.46132	0.529019	-17.8847	1.55264e-71	2.36686e-70
ENSG00000001036.9	FUCA2	3554.96	-1.11889	0.0484195	-23.1082	3.82663e-118	1.05433e-116
ENSG00000001084.6	GCLC	3696.64	0.534441	0.0640916	8.3387	7.51138e-17	3.92749e-16
ENSG00000001167.10	NFYA	2582.68	-0.366992	0.0677783	-5.4146	6.14269e-08	2.20764e-07
ENSG00000001460.13	STPG1	229.628	0.981071	0.106785	9.18731	4.02793e-20	2.33042e-19
ENSG00000001461.12	NIPAL3	2643.61	1.49956	0.0512258	29.2736	2.24736e-188	1.1869e-186
ENSG00000001497.12	LAS1L	5837.28	0.393872	0.0486262	8.1	5.49574e-16	2.78609e-15
ENSG00000001561.6	ENPP4	811.074	1.59301	0.0899383	17.7122	3.37352e-70	5.06161e-69
ENSG00000001617.7	SEMA3F	52.6721	-4.31738	0.396075	-10.9004	1.14727e-27	8.11534e-27
ENSG00000001626.10	CFTR	3.02338	2.98087	0.966353	3.08466	0.00203788	0.00510862
ENSG00000001629.5	ANKIB1	3809.29	-0.398221	0.0646297	-6.16158	7.20245e-10	2.85447e-09
ENSG00000001630.11	CYP51A1	328.077	-1.81873	0.360666	-5.04269	4.59038e-07	1.57118e-06
ENSG00000001631.10	KRIT1	3347.3	0.348336	0.04793	7.26758	3.65974e-13	1.67051e-12
ENSG00000002016.12	RAD52	1271.46	1.38387	0.0606376	22.8221	2.76894e-115	7.3757e-114
ENSG00000002079.8	MYH16	1.38975	1.28428	1.05252	1.2202	0.222389	0.312598
ENSG00000002330.9	BAD	537.812	-1.59199	0.180263	-8.83146	1.03315e-18	5.7294e-18
ENSG00000002549.8	LAP3	6515.95	0.544563	0.0489084	11.1343	8.53677e-29	6.21603e-28
ENSG00000002586.13	CD99	0.375452	-0.37538	1.34118	-0.279887	0.779564	NA
ENSG00000002587.5	HS3ST1	0.679314	2.5353	1.35252	1.8745	0.0608619	0.110448
ENSG00000002726.15	AOC1	1613.42	0.290006	0.110652	2.62088	0.00877024	0.0199029
ENSG00000002745.8	WNT16	0.264274	1.46239	1.31931	1.10845	0.267667	NA
ENSG00000002746.10	HECW1	1.83754	2.91235	1.12146	2.59694	0.00940589	0.0211782
ENSG00000002822.11	MAD1L1	2636.9	0.255675	0.127452	2.00605	0.0448514	0.0852253
ENSG00000002834.13	LASP1	6239.55	0.843935	0.055864	15.107	1.45727e-51	1.66695e-50
ENSG00000002919.10	SNX11	1455.08	0.247124	0.0680194	3.63314	0.00027999	0.0007741
ENSG00000002933.3	TMEM176A	24.0405	-6.27999	0.877882	-7.15357	8.45515e-13	3.80638e-12
ENSG00000003056.3	M6PR	11384.1	0.865455	0.05285	16.3757	2.85209e-60	3.71576e-59
ENSG00000003096.9	KLHL13	247.303	-0.332403	0.100323	-3.31333	0.000921911	0.00241352
ENSG00000003137.4	CYP26B1	0.516473	1.02781	1.3273	0.774363	0.438716	0.542661
ENSG00000003147.13	ICA1	818.572	-0.140609	0.0710673	-1.97854	0.0478681	0.09007
ENSG00000003249.9	DBNDD1	3.40972	-1.04723	0.752006	-1.39258	0.163748	0.247061
ENSG00000003393.10	ALS2	6927.63	0.330793	0.0547953	6.03689	1.5711e-09	6.1348e-09
ENSG00000003400.10	CASP10	1172.76	1.36028	0.0848733	16.0272	8.24779e-58	1.03857e-56
ENSG00000003402.15	CFLAR	3084.36	2.15502	0.0480116	44.8854	0	0
ENSG00000003436.10	TFPI	254.062	-4.41603	0.201743	-21.8893	3.28182e-106	7.84984e-105
ENSG00000003509.11	NDUFAF7	1361.04	0.648708	0.0678871	9.55569	1.22765e-21	7.44039e-21
ENSG00000003756.12	RBM5	5762.61	0.103363	0.0467749	2.2098	0.0271191	0.0552333
ENSG00000003987.9	MTMR7	1.63824	1.0438	1.11683	0.934614	0.349987	0.454184
ENSG00000003989.12	SLC7A2	460.699	10.3434	0.762865	13.5586	7.04431e-42	6.77165e-41
ENSG00000004059.6	ARF5	1709.09	-0.5347	0.0758484	-7.04959	1.79442e-12	7.97803e-12
ENSG00000004139.9	SARM1	15.9723	3.0396	0.481467	6.3132	2.73331e-10	1.10658e-09
ENSG00000004142.7	POLDIP2	5553.55	1.05029	0.0422348	24.8679	1.65636e-136	5.45669e-135
ENSG00000004399.8	PLXND1	6834.66	0.18262	0.100691	1.81368	0.0697272	0.124446
ENSG00000004455.12	AK2	23144	0.505279	0.0438444	11.5244	9.94525e-31	7.63379e-30
ENSG00000004468.8	CD38	8572.45	-6.94445	0.0832898	-83.377	0	0
ENSG00000004478.5	FKBP4	22316.9	-1.13857	0.0427592	-26.6274	3.26977e-156	1.30589e-154
ENSG00000004487.11	KDM1A	13108.3	-0.457073	0.051464	-8.88142	6.60131e-19	3.68496e-18
ENSG00000004534.10	RBM6	6970.13	-0.11499	0.050013	-2.29921	0.0214932	0.0446707
ENSG00000004660.10	CAMKK1	452.634	-0.329844	0.0934896	-3.52814	0.00041849	0.00113448
ENSG00000004700.11	RECQL	4341.97	0.276867	0.0666377	4.15481	3.25562e-05	9.81096e-05
ENSG00000004766.11	CCDC132	1833.49	1.06824	0.0655052	16.3077	8.70242e-60	1.12511e-58
ENSG00000004776.7	HSPB6	0.733159	-1.29456	1.32802	-0.974805	0.329657	0.432126
ENSG00000004777.14	ARHGAP33	245.239	-1.35507	0.210407	-6.44024	1.19286e-10	4.90818e-10
ENSG00000004779.5	NDUFAB1	4017.63	0.603242	0.0591014	10.2069	1.84655e-24	1.20907e-23
ENSG00000004799.7	PDK4	0.654157	2.68133	1.34194	1.9981	0.0457061	0.0864664
ENSG00000004809.9	SLC22A16	2146.39	-1.09869	0.0560001	-19.6194	1.05685e-85	1.95184e-84
ENSG00000004838.9	ZMYND10	24.5109	-1.42493	0.326359	-4.36615	1.26455e-05	3.93573e-05
ENSG00000004846.12	ABCB5	2.09428	4.08963	1.23748	3.3048	0.000950434	0.00248371
ENSG00000004848.6	ARX	0.135089	0.899545	1.21864	0.738155	0.46042	NA
ENSG00000004864.9	SLC25A13	2150.32	0.32518	0.0702486	4.62899	3.67445e-06	1.18463e-05
ENSG00000004866.14	ST7	1698.34	-0.196708	0.0633452	-3.10534	0.0019006	0.00477982
ENSG00000004897.7	CDC27	8076.16	-0.444644	0.056512	-7.86813	3.59974e-15	1.7707e-14
ENSG00000004939.9	SLC4A1	1.30517	-0.468382	1.12352	-0.416887	0.676761	0.757474
ENSG00000004948.9	CALCR	0.776667	2.73148	1.34377	2.0327	0.0420831	0.080736
ENSG00000004961.10	HCCS	1243.85	0.118164	0.0648296	1.82269	0.0683498	0.122318
ENSG00000004975.7	DVL2	1405.11	-0.539137	0.109374	-4.92928	8.25343e-07	2.78339e-06
ENSG00000005001.5	PRSS22	0.128947	0.881431	1.21709	0.72421	0.468937	NA
ENSG00000005007.8	UPF1	9441.36	-0.0223975	0.112115	-0.199773	0.841658	0.89018
ENSG00000005020.8	SKAP2	3672.22	2.68861	0.0622258	43.2073	0	0
ENSG00000005022.5	SLC25A5	24066.8	0.0433192	0.0353252	1.2263	0.220086	0.310107
ENSG00000005059.11	CCDC109B	868.136	-5.35992	0.133406	-40.1775	0	0
ENSG00000005073.5	HOXA11	26.2169	4.93256	0.573328	8.60339	7.73949e-18	4.18463e-17
ENSG00000005075.11	POLR2J	1304.81	-0.4314	0.113589	-3.79791	0.000145923	0.000414767
ENSG00000005100.8	DHX33	1897.18	-0.621405	0.0613378	-10.1309	4.03025e-24	2.61863e-23
ENSG00000005102.8	MEOX1	0.355226	-0.321017	1.34947	-0.237884	0.811971	NA
ENSG00000005108.11	THSD7A	74.8107	-4.92037	0.370798	-13.2697	3.47066e-40	3.23727e-39
ENSG00000005156.7	LIG3	4401.97	1.85398	0.0523109	35.4416	3.90408e-275	3.9789e-273
ENSG00000005175.5	RPAP3	2700	0.0593953	0.0738972	0.803756	0.421538	0.526499
ENSG00000005187.7	ACSM3	811.193	-1.49841	0.0819484	-18.2848	1.09402e-74	1.73275e-73
ENSG00000005189.15	AC004381.6	1543.39	1.15946	0.0522	22.2119	2.63794e-109	6.52484e-108
ENSG00000005194.10	CIAPIN1	4838.36	-0.133597	0.0556001	-2.40282	0.0162693	0.0348547
ENSG00000005206.12	SPPL2B	1568.91	0.324229	0.150836	2.14954	0.0315912	0.0627832
ENSG00000005238.15	FAM214B	633.142	-1.69685	0.102223	-16.5995	7.03147e-62	9.45586e-61
ENSG00000005243.5	COPZ2	9.31153	-4.03215	0.785435	-5.13365	2.84171e-07	9.82586e-07
ENSG00000005249.8	PRKAR2B	458.818	-4.11705	0.139198	-29.577	2.951e-192	1.60296e-190
ENSG00000005302.13	MSL3	1534.67	0.771126	0.0628725	12.2649	1.3976e-34	1.16971e-33
ENSG00000005339.8	CREBBP	1674.45	0.500746	0.0616585	8.12127	4.6133e-16	2.34654e-15
ENSG00000005379.11	BZRAP1	11683.4	-1.75221	0.110055	-15.9213	4.50942e-57	5.60651e-56
ENSG00000005381.6	MPO	455775	0.944654	0.103076	9.16465	4.97071e-20	2.87043e-19
ENSG00000005421.4	PON1	0.267373	1.4139	1.31098	1.07851	0.280806	NA
ENSG00000005436.9	GCFC2	1770.05	-0.343511	0.0652316	-5.26603	1.39405e-07	4.91107e-07
ENSG00000005448.12	WDR54	633.329	-3.47759	0.109012	-31.9009	2.59655e-223	1.75832e-221
ENSG00000005469.7	CROT	105.461	8.39611	0.809379	10.3735	3.27266e-25	2.18223e-24
ENSG00000005471.11	ABCB4	2.79565	4.43616	1.2101	3.66594	0.000246435	0.000685434
ENSG00000005483.15	KMT2E	2973.9	0.441444	0.0775753	5.69053	1.26648e-08	4.72264e-08
ENSG00000005486.12	RHBDD2	1062.62	-3.1404	0.0939753	-33.4173	7.68178e-245	6.30962e-243
ENSG00000005513.9	SOX8	0	NA	NA	NA	NA	NA
ENSG00000005700.10	IBTK	8198.13	0.43572	0.0598613	7.27883	3.36719e-13	1.53813e-12
ENSG00000005801.12	ZNF195	2678.83	1.1741	0.0581572	20.1884	1.23737e-90	2.44212e-89
ENSG00000005810.13	MYCBP2	20208.2	1.33222	0.0580587	22.9462	1.60888e-116	4.35798e-115
ENSG00000005812.6	FBXL3	3588.56	0.0136068	0.0720275	0.188911	0.850163	0.896622
ENSG00000005844.13	ITGAL	2644.66	7.51159	0.14728	51.002	0	0
ENSG00000005882.7	PDK2	247.011	-6.99146	0.400371	-17.4625	2.7667e-68	4.03782e-67
ENSG00000005884.13	ITGA3	2.9964	0.603557	0.757281	0.797006	0.425448	0.530317
ENSG00000005889.11	ZFX	5300.37	-0.0586372	0.0548078	-1.06987	0.284678	0.383951
ENSG00000005893.11	LAMP2	18225.3	-0.208373	0.0709657	-2.93624	0.00332212	0.00808007
ENSG00000005955.8	GGNBP2	3272.38	0.541359	0.0691073	7.8336	4.74108e-15	2.32238e-14
ENSG00000005961.13	ITGA2B	950.205	-2.27846	0.123623	-18.4308	7.44264e-76	1.19936e-74
ENSG00000005981.8	ASB4	1.42463	3.51449	1.29034	2.72369	0.00645574	0.0150253
ENSG00000006007.7	GDE1	3614.78	0.861797	0.056854	15.1581	6.70164e-52	7.72387e-51
ENSG00000006015.13	C19orf60	963.658	-0.368258	0.142368	-2.58667	0.00969084	0.0217619
ENSG00000006016.6	CRLF1	2.00729	-1.735	0.957543	-1.81193	0.0699968	0.124854
ENSG00000006025.7	OSBPL7	1082.01	-0.0767893	0.127702	-0.601318	0.547628	0.642731
ENSG00000006042.7	TMEM98	0.380642	1.72831	1.34335	1.28657	0.198246	NA
ENSG00000006047.8	YBX2	1.02866	3.02661	1.32888	2.27757	0.0227523	0.0470661
ENSG00000006059.3	KRT33A	0	NA	NA	NA	NA	NA
ENSG00000006062.9	MAP3K14	394.139	-0.476225	0.116676	-4.0816	4.47265e-05	0.00013314
ENSG00000006071.7	ABCC8	5.97329	-0.94351	0.599869	-1.57286	0.115751	0.188494
ENSG00000006074.4	CCL18	0.648016	2.53851	1.35167	1.87805	0.0603741	0.109764
ENSG00000006075.11	CCL3	13.7995	6.45315	1.06496	6.05951	1.36534e-09	5.34782e-09
ENSG00000006114.11	SYNRG	1555.19	1.40757	0.0626899	22.4529	1.19893e-111	3.05733e-110
ENSG00000006116.3	CACNG3	0.385606	0.540534	1.35354	0.399349	0.689636	NA
ENSG00000006118.10	TMEM132A	3.23362	-1.21985	0.812185	-1.50193	0.133114	0.209925
ENSG00000006125.12	AP2B1	8199.34	0.514595	0.0580386	8.86643	7.55271e-19	4.20602e-18
ENSG00000006128.7	TAC1	0.125848	0.87702	1.21671	0.720811	0.471026	NA
ENSG00000006194.6	ZNF263	2730.94	0.996951	0.0545469	18.277	1.26265e-74	1.99568e-73
ENSG00000006210.6	CX3CL1	0.524972	2.29123	1.35848	1.68662	0.0916766	0.15504
ENSG00000006282.15	SPATA20	723.309	-1.86512	0.12788	-14.5849	3.50363e-48	3.82263e-47
ENSG00000006283.13	CACNA1G	1.43279	1.29548	1.06867	1.21224	0.225419	0.316174
ENSG00000006327.9	TNFRSF12A	85.4695	0.381266	0.178622	2.13448	0.0328032	0.0648046
ENSG00000006377.9	DLX6	0.411941	1.88734	1.35394	1.39396	0.16333	0.246503
ENSG00000006432.11	MAP3K9	107.617	-1.5345	0.171226	-8.96188	3.19192e-19	1.79825e-18
ENSG00000006451.3	RALA	2497.32	0.406879	0.0846317	4.80765	1.52715e-06	5.06496e-06
ENSG00000006453.9	BAIAP2L1	2.87491	-0.17291	0.889535	-0.194383	0.845876	0.89331
ENSG00000006459.6	JHDM1D	57.044	1.54809	0.218803	7.07529	1.49134e-12	6.65286e-12
ENSG00000006468.9	ETV1	81.6426	3.89864	0.275776	14.137	2.24656e-45	2.3097e-44
ENSG00000006530.11	AGK	2264.43	1.11402	0.0581311	19.1638	7.41796e-82	1.29466e-80
ENSG00000006534.11	ALDH3B1	1640.1	1.61414	0.112088	14.4006	5.12883e-47	5.46853e-46
ENSG00000006555.6	TTC22	1.18557	3.39876	1.29265	2.6293	0.00855615	0.0194719
ENSG00000006576.12	PHTF2	1703	-0.558461	0.0563837	-9.90464	3.97381e-23	2.51336e-22
ENSG00000006606.4	CCL26	0.702691	-0.525682	1.30575	-0.402589	0.687251	0.765362
ENSG00000006607.9	FARP2	1973.61	0.362024	0.0515633	7.02096	2.2035e-12	9.7626e-12
ENSG00000006611.11	USH1C	0.648225	1.3335	1.30535	1.02156	0.306989	0.407461
ENSG00000006625.13	GGCT	4576.82	0.988977	0.0533869	18.5247	1.30526e-76	2.12361e-75
ENSG00000006634.3	DBF4	4824.28	-0.172725	0.0689393	-2.50546	0.0122292	0.026973
ENSG00000006638.7	TBXA2R	62.2555	-8.168	0.976387	-8.36553	5.98436e-17	3.14362e-16
ENSG00000006652.9	IFRD1	3424.64	-0.18273	0.0579343	-3.1541	0.00160996	0.00409465
ENSG00000006659.8	LGALS14	0.233321	-1.29779	1.3017	-0.996994	0.318767	NA
ENSG00000006695.6	COX10	841.963	0.334362	0.0621224	5.38232	7.35333e-08	2.63311e-07
ENSG00000006704.6	GTF2IRD1	688.437	-1.31713	0.0775445	-16.9855	1.05145e-64	1.47044e-63
ENSG00000006712.10	PAF1	2026.92	-0.318277	0.0538271	-5.91295	3.36032e-09	1.29226e-08
ENSG00000006715.11	VPS41	5110.75	0.464175	0.0598503	7.75559	8.79306e-15	4.27286e-14
ENSG00000006740.12	ARHGAP44	11.781	0.138711	0.417405	0.332318	0.739649	0.804115
ENSG00000006744.14	ELAC2	4269.06	0.0723553	0.0468385	1.54478	0.122399	0.196785
ENSG00000006747.10	SCIN	2.10042	4.08824	1.23811	3.302	0.000959967	0.0025069
ENSG00000006756.11	ARSD	1397.34	-1.6312	0.064245	-25.3903	3.2267e-142	1.1328e-140
ENSG00000006757.7	PNPLA4	559.184	0.075997	0.0807936	0.940631	0.346894	0.450785
ENSG00000006788.8	MYH13	0.808261	2.74415	1.34367	2.04228	0.0411242	0.0791597
ENSG00000006831.9	ADIPOR2	6681.08	-0.135417	0.0613235	-2.20825	0.0272271	0.055431
ENSG00000006837.7	CDKL3	23.9906	-0.86722	0.307451	-2.82068	0.00479222	0.0113982
ENSG00000007001.8	UPP2	1.14409	2.11523	1.24671	1.69666	0.0897613	0.15275
ENSG00000007038.6	PRSS21	2102.81	-11.456	0.64022	-17.8938	1.31842e-71	2.01082e-70
ENSG00000007047.10	MARK4	356.273	-1.81619	0.0981821	-18.4981	2.13736e-76	3.46445e-75
ENSG00000007062.7	PROM1	3.26927	2.97153	1.05456	2.8178	0.00483537	0.0114936
ENSG00000007080.6	CCDC124	1141.28	0.0337277	0.189875	0.177631	0.859013	0.903185
ENSG00000007129.13	CEACAM21	83.8246	-1.45578	0.19406	-7.50172	6.29879e-14	2.96345e-13
ENSG00000007168.8	PAFAH1B1	4945.6	-0.0372039	0.0612123	-0.607785	0.54333	0.639237
ENSG00000007171.12	NOS2	0.61408	0.484957	1.30784	0.370808	0.71078	0.783123
ENSG00000007174.13	DNAH9	1.33628	3.52963	1.28275	2.75162	0.00593017	0.0138816
ENSG00000007202.10	KIAA0100	27494	0.932165	0.039158	23.8053	2.94605e-125	8.73296e-124
ENSG00000007216.10	SLC13A2	0.669302	2.2431	1.35971	1.64969	0.0990064	0.165489
ENSG00000007237.14	GAS7	1001.5	2.48669	0.0796058	31.2375	3.2995e-214	2.1257e-212
ENSG00000007255.6	TRAPPC6A	838.616	-0.184813	0.170865	-1.08163	0.279417	0.378279
ENSG00000007264.9	MATK	2781.73	0.733664	0.169835	4.31987	1.56123e-05	4.82852e-05
ENSG00000007306.10	CEACAM7	0.389884	1.99382	1.35848	1.46768	0.142192	0.219261
ENSG00000007312.8	CD79B	1525.02	-11.1217	0.60385	-18.4179	9.43488e-76	1.5172e-74
ENSG00000007314.7	SCN4A	2.93704	-0.0408175	0.800427	-0.0509946	0.95933	0.967361
ENSG00000007341.14	ST7L	896.87	0.558289	0.0669952	8.33328	7.86352e-17	4.10442e-16
ENSG00000007350.12	TKTL1	0.387288	0.569819	1.35952	0.419131	0.67512	NA
ENSG00000007372.16	PAX6	3.82731	1.10375	0.726012	1.52029	0.128438	0.203616
ENSG00000007376.3	RPUSD1	1156.13	0.684254	0.274601	2.49181	0.0127093	0.0279168
ENSG00000007384.11	RHBDF1	2.41911	1.47953	0.858608	1.72317	0.0848569	0.146341
ENSG00000007392.12	LUC7L	1964.33	1.27566	0.0514842	24.7777	1.5578e-135	5.0771e-134
ENSG00000007402.7	CACNA2D2	1.50448	0.552036	1.05193	0.524786	0.599732	0.689256
ENSG00000007516.9	BAIAP3	6.31525	-0.710558	0.598435	-1.18736	0.235086	0.327861
ENSG00000007520.3	TSR3	1013.68	0.836174	0.145642	5.7413	9.39502e-09	3.52884e-08
ENSG00000007541.10	PIGQ	807.037	1.32038	0.183641	7.18999	6.47942e-13	2.93079e-12
ENSG00000007545.11	CRAMP1L	829.58	1.08729	0.0757814	14.3478	1.10042e-46	1.16353e-45
ENSG00000007866.14	TEAD3	23.9262	5.02238	0.612665	8.1976	2.45225e-16	1.25889e-15
ENSG00000007908.11	SELE	0.657019	2.33808	1.35898	1.72046	0.0853484	0.147089
ENSG00000007923.11	DNAJC11	5396.41	-0.101336	0.0523921	-1.93419	0.0530897	0.0984783
ENSG00000007933.8	FMO3	0.260936	1.45382	1.31815	1.10293	0.270057	NA
ENSG00000007944.10	MYLIP	1089.72	-2.99757	0.0877141	-34.1743	5.82639e-256	5.16127e-254
ENSG00000007952.13	NOX1	0.405799	1.77381	1.34644	1.31741	0.187701	0.272191
ENSG00000007968.6	E2F2	1161.92	-0.331213	0.0643376	-5.14805	2.63207e-07	9.11444e-07
ENSG00000008018.8	PSMB1	10295.5	0.927449	0.043596	21.2737	1.98927e-100	4.48365e-99
ENSG00000008056.8	SYN1	8.92615	-1.40854	0.548199	-2.5694	0.0101876	0.0227717
ENSG00000008083.9	JARID2	6045.8	-0.483502	0.039417	-12.2663	1.37319e-34	1.1496e-33
ENSG00000008086.6	CDKL5	6.73922	4.72404	0.967609	4.88217	1.04922e-06	3.51081e-06
ENSG00000008118.5	CAMK1G	0.273515	1.48593	1.32238	1.12368	0.261149	NA
ENSG00000008128.18	CDK11A	53.2596	-0.104761	0.199614	-0.52482	0.599708	0.689255
ENSG00000008130.11	NADK	4451.14	0.494399	0.0903259	5.4735	4.41235e-08	1.59897e-07
ENSG00000008196.8	TFAP2B	1.29416	1.6979	1.13079	1.50151	0.133223	0.210086
ENSG00000008197.4	TFAP2D	0.251695	1.17838	1.2617	0.933966	0.350322	NA
ENSG00000008226.15	DLEC1	13.881	4.7979	0.737555	6.50513	7.76251e-11	3.22139e-10
ENSG00000008256.11	CYTH3	1484.33	-0.248287	0.0701464	-3.53955	0.000400816	0.00108879
ENSG00000008277.10	ADAM22	447.644	-3.36019	0.11752	-28.5924	8.35455e-180	4.04108e-178
ENSG00000008282.3	SYPL1	5387.29	-0.825846	0.0906751	-9.10775	8.41098e-20	4.82144e-19
ENSG00000008283.11	CYB561	396.768	-3.70585	0.137153	-27.0198	8.65714e-161	3.61878e-159
ENSG00000008294.16	SPAG9	6532.05	0.322289	0.0614682	5.24318	1.57833e-07	5.54299e-07
ENSG00000008300.10	CELSR3	1970.71	-5.29957	0.095989	-55.2102	0	0
ENSG00000008311.10	AASS	1.83305	3.88257	1.25789	3.08657	0.00202479	0.00507706
ENSG00000008323.11	PLEKHG6	1.25462	0.589178	1.11879	0.526623	0.598456	0.688098
ENSG00000008324.6	SS18L2	1698.34	-0.553736	0.0667542	-8.29514	1.08453e-16	5.63496e-16
ENSG00000008382.11	MPND	227.071	0.187098	0.145265	1.28797	0.197755	0.283678
ENSG00000008394.8	MGST1	9803.98	0.472895	0.0634905	7.44828	9.45641e-14	4.417e-13
ENSG00000008405.7	CRY1	973.553	1.78717	0.0689391	25.9239	3.57968e-148	1.32705e-146
ENSG00000008438.4	PGLYRP1	0.537551	2.30625	1.35824	1.69797	0.0895137	0.152584
ENSG00000008441.12	NFIX	2546.02	-3.18541	0.077057	-41.3383	0	0
ENSG00000008513.10	ST3GAL1	2816.82	-1.50668	0.0570404	-26.4143	9.39045e-154	3.69232e-152
ENSG00000008516.12	MMP25	6.43117	-0.139883	0.547953	-0.255282	0.798505	0.85373
ENSG00000008517.12	IL32	0.227296	-1.23256	1.28784	-0.957076	0.338529	NA
ENSG00000008710.13	PKD1	1686.88	0.14106	0.179866	0.784249	0.432894	0.536745
ENSG00000008735.10	MAPK8IP2	1.67442	0.707713	1.00313	0.705508	0.480494	0.581569
ENSG00000008838.13	MED24	5081.78	0.0384692	0.0927275	0.414862	0.678243	0.758655
ENSG00000008853.12	RHOBTB2	269.955	0.829735	0.125161	6.62936	3.37139e-11	1.42058e-10
ENSG00000008869.7	HEATR5B	4749.62	0.197077	0.0593603	3.32001	0.000900147	0.00235877
ENSG00000008952.12	SEC62	12384.1	-0.332429	0.0829447	-4.00784	6.12767e-05	0.000180275
ENSG00000008988.5	RPS20	48918.4	-0.509884	0.0399607	-12.7596	2.75458e-37	2.43588e-36
ENSG00000009307.11	CSDE1	65439.3	-0.0520332	0.0542489	-0.959156	0.33748	0.440751
ENSG00000009335.13	UBE3C	6950.98	0.552729	0.0418205	13.2167	7.02653e-40	6.52207e-39
ENSG00000009413.11	REV3L	5510.92	0.382331	0.0654235	5.84394	5.09801e-09	1.94117e-08
ENSG00000009694.9	TENM1	2.78543	1.15389	0.796539	1.44863	0.147442	0.226336
ENSG00000009709.7	PAX7	1.42537	2.49912	1.173	2.13054	0.0331273	0.065411
ENSG00000009724.12	MASP2	1.44235	-1.69785	1.07338	-1.58178	0.1137	0.185471
ENSG00000009765.10	IYD	2.38301	3.26476	1.09093	2.99264	0.00276575	0.00680232
ENSG00000009780.11	FAM76A	716.525	0.267728	0.0923348	2.89953	0.00373718	0.00901473
ENSG00000009790.10	TRAF3IP3	1026.1	0.852022	0.0634005	13.4387	3.5858e-41	3.40087e-40
ENSG00000009830.7	POMT2	892.195	-0.287995	0.0793678	-3.62861	0.000284956	0.000787117
ENSG00000009844.11	VTA1	6659.64	-0.293108	0.064043	-4.57674	4.72276e-06	1.51221e-05
ENSG00000009950.11	MLXIPL	76.0087	7.51692	0.731417	10.2772	8.92853e-25	5.88279e-24
ENSG00000009954.6	BAZ1B	16754.2	0.207168	0.0470409	4.404	1.06272e-05	3.32284e-05
ENSG00000010017.9	RANBP9	3426.22	-0.209187	0.0484351	-4.31891	1.56799e-05	4.84893e-05
ENSG00000010030.9	ETV7	1.20405	3.22278	1.31564	2.4496	0.0143016	0.0310055
ENSG00000010072.11	SPRTN	1551.72	-0.283508	0.0571426	-4.96141	6.99826e-07	2.36848e-06
ENSG00000010165.15	METTL13	3671.8	0.300371	0.0465162	6.45736	1.06548e-10	4.39533e-10
ENSG00000010219.9	DYRK4	932.691	-0.0641614	0.0750605	-0.854795	0.392665	0.49832
ENSG00000010244.12	ZNF207	12095.8	0.936997	0.0499978	18.7408	2.30338e-78	3.82511e-77
ENSG00000010256.6	UQCRC1	10359.2	0.402313	0.0794648	5.06279	4.13175e-07	1.41723e-06
ENSG00000010270.9	STARD3NL	3842.74	-0.321398	0.0514143	-6.25115	4.07452e-10	1.63609e-09
ENSG00000010278.7	CD9	2.41146	0.874214	0.830263	1.05294	0.29237	0.392643
ENSG00000010282.10	HHATL	0.789541	2.75903	1.34189	2.05607	0.039776	0.0769485
ENSG00000010292.8	NCAPD2	18248.8	0.610693	0.0352466	17.3263	2.97915e-67	4.2944e-66
ENSG00000010295.15	IFFO1	1248.12	-0.146987	0.102676	-1.43156	0.15227	0.232634
ENSG00000010310.4	GIPR	9.49613	-1.69847	0.581482	-2.92094	0.00348979	0.00845613
ENSG00000010318.15	PHF7	864.768	-0.633808	0.0756999	-8.37264	5.63398e-17	2.96109e-16
ENSG00000010319.2	SEMA3G	598.59	-1.17627	0.0920719	-12.7756	2.24422e-37	1.98572e-36
ENSG00000010322.11	NISCH	4248	-0.1138	0.0893463	-1.27369	0.202773	0.289802
ENSG00000010327.6	STAB1	10.87	-1.58789	0.500582	-3.17209	0.00151348	0.00386527
ENSG00000010361.9	FUZ	702.011	-0.268387	0.101975	-2.63188	0.00849149	0.0193336
ENSG00000010379.11	SLC6A13	1.58573	-0.413198	0.962039	-0.429502	0.667558	0.749953
ENSG00000010404.13	IDS	1040.09	-2.53583	0.101864	-24.8942	8.59842e-137	2.84804e-135
ENSG00000010438.12	PRSS3	0	NA	NA	NA	NA	NA
ENSG00000010539.7	ZNF200	1251.68	1.29548	0.0664118	19.5068	9.60361e-85	1.75135e-83
ENSG00000010610.5	CD4	11387.8	-0.689212	0.0524558	-13.1389	1.97043e-39	1.8146e-38
ENSG00000010626.10	LRRC23	244.276	0.644922	0.102465	6.29408	3.09238e-10	1.24912e-09
ENSG00000010671.11	BTK	9773.73	0.218846	0.0523806	4.178	2.94081e-05	8.8966e-05
ENSG00000010704.14	HFE	3.45624	-0.219899	0.707895	-0.310639	0.756075	0.817464
ENSG00000010803.12	SCMH1	3413.58	-0.426228	0.0495853	-8.59585	8.26507e-18	4.46168e-17
ENSG00000010810.13	FYN	206.609	0.284991	0.114471	2.48963	0.0127876	0.0280695
ENSG00000010818.4	HIVEP2	1751.69	-0.134986	0.0517411	-2.60888	0.00908386	0.020561
ENSG00000010932.11	FMO1	4.51526	-0.811273	0.701078	-1.15718	0.247199	0.342172
ENSG00000011007.8	TCEB3	6291.25	-0.533392	0.0420926	-12.6719	8.46636e-37	7.4009e-36
ENSG00000011009.6	LYPLA2	2036.65	-0.262536	0.125025	-2.09987	0.0357407	0.0700537
ENSG00000011021.17	CLCN6	1197.74	-1.55095	0.0674774	-22.9848	6.61896e-117	1.79928e-115
ENSG00000011028.9	MRC2	7369.69	-0.343494	0.156028	-2.2015	0.0277009	0.0562604
ENSG00000011052.17	NME2	0	NA	NA	NA	NA	NA
ENSG00000011083.4	SLC6A7	1.0434	1.99011	1.25493	1.58583	0.112777	0.18436
ENSG00000011105.7	TSPAN9	6.89661	-2.14099	0.607136	-3.52637	0.000421296	0.00114178
ENSG00000011114.10	BTBD7	3559.29	0.0471958	0.0658605	0.716603	0.473619	0.575396
ENSG00000011132.7	APBA3	299.503	0.412572	0.184884	2.23152	0.0256467	0.0525086
ENSG00000011143.12	MKS1	1181.42	0.751979	0.0548691	13.705	9.4806e-43	9.30742e-42
ENSG00000011198.3	ABHD5	633.221	0.323692	0.0719236	4.50049	6.77961e-06	2.14711e-05
ENSG00000011201.6	KAL1	1.15171	0.939317	1.11441	0.842882	0.399294	0.504572
ENSG00000011243.13	AKAP8L	2930.43	-0.101621	0.0630659	-1.61134	0.107106	0.177046
ENSG00000011258.11	MBTD1	4065.93	0.255846	0.0665155	3.84641	0.00011986	0.000343649
ENSG00000011260.9	UTP18	5803.65	0.0157272	0.054275	0.289769	0.771993	0.830829
ENSG00000011275.14	RNF216	4654.11	-0.487909	0.0402721	-12.1153	8.76313e-34	7.24075e-33
ENSG00000011295.11	TTC19	2401.51	0.872625	0.0670341	13.0176	9.71399e-39	8.86536e-38
ENSG00000011304.12	PTBP1	15543.2	0.298788	0.0878685	3.40041	0.000672861	0.00178669
ENSG00000011332.15	DPF1	29.2735	-3.79891	0.429063	-8.85396	8.4471e-19	4.69723e-18
ENSG00000011347.5	SYT7	1.5038	0.162957	0.977365	0.166731	0.867582	0.909469
ENSG00000011376.5	LARS2	4353.59	0.378073	0.048403	7.81094	5.67653e-15	2.77391e-14
ENSG00000011405.9	PIK3C2A	2904.78	0.831612	0.0707283	11.7578	6.43557e-32	5.07797e-31
ENSG00000011422.7	PLAUR	1285.82	0.147996	0.0751466	1.96943	0.0489034	0.0916616
ENSG00000011426.6	ANLN	7923.21	0.0300318	0.0629924	0.476752	0.633539	0.720044
ENSG00000011451.13	WIZ	1012.26	-0.405157	0.146792	-2.76007	0.00577889	0.0135545
ENSG00000011454.12	RABGAP1	2136.05	0.034807	0.0559308	0.622322	0.53373	0.630719
ENSG00000011465.12	DCN	1.65964	2.62192	1.19224	2.19915	0.0278672	0.056549
ENSG00000011478.7	QPCTL	673.977	-0.138594	0.100267	-1.38225	0.166895	0.249904
ENSG00000011485.10	PPP5C	4968.69	-0.0610788	0.0909936	-0.671243	0.502066	0.601583
ENSG00000011523.9	CEP68	1908.49	0.110366	0.0510461	2.16208	0.0306122	0.061078
ENSG00000011566.10	MAP4K3	1055.18	-0.490798	0.076029	-6.4554	1.07931e-10	4.45e-10
ENSG00000011590.9	ZBTB32	0.955749	-1.06321	1.15037	-0.924235	0.355364	0.459978
ENSG00000011600.7	TYROBP	993.526	2.41742	0.0841114	28.7407	1.18351e-181	5.81695e-180
ENSG00000011638.6	TMEM159	915.618	-0.313993	0.0733931	-4.27823	1.88381e-05	5.78684e-05
ENSG00000011677.8	GABRA3	0.924868	2.93286	1.33292	2.20033	0.0277836	0.0564057
ENSG00000012048.15	BRCA1	8800.69	0.89335	0.0598014	14.9386	1.84787e-50	2.08634e-49
ENSG00000012061.11	ERCC1	4320.92	0.223478	0.0909971	2.45588	0.0140539	0.0305271
ENSG00000012124.10	CD22	9.70844	-2.52505	0.624911	-4.04066	5.33017e-05	0.000157542
ENSG00000012171.13	SEMA3B	2.5724	-1.30735	0.912619	-1.43253	0.151993	0.232305
ENSG00000012174.7	MBTPS2	767.225	0.401034	0.0930089	4.31179	1.6194e-05	5.00081e-05
ENSG00000012211.8	PRICKLE3	324.246	-0.348398	0.107	-3.25605	0.00112974	0.00292742
ENSG00000012223.8	LTF	3.0446	4.48746	1.21065	3.70666	0.00021001	0.000588472
ENSG00000012232.4	EXTL3	895.359	-1.20674	0.0992134	-12.1631	4.88737e-34	4.0559e-33
ENSG00000012504.9	NR1H4	1.17414	2.1839	1.22754	1.77908	0.0752262	0.132645
ENSG00000012660.9	ELOVL5	11039.6	-0.221088	0.0617811	-3.57858	0.000345472	0.000944515
ENSG00000012779.6	ALOX5	1962.71	1.29297	0.0858909	15.0537	3.26529e-51	3.72113e-50
ENSG00000012817.11	KDM5D	0	NA	NA	NA	NA	NA
ENSG00000012822.11	CALCOCO1	1032.27	0.489074	0.066469	7.35792	1.86791e-13	8.61264e-13
ENSG00000012963.9	UBR7	4054.47	0.231682	0.0595333	3.89163	9.95713e-05	0.000287279
ENSG00000012983.7	MAP4K5	3175.87	-0.170615	0.0538454	-3.16861	0.00153168	0.00390976
ENSG00000013016.10	EHD3	4.54371	2.77616	0.860923	3.22464	0.00126132	0.00324905
ENSG00000013275.3	PSMC4	4901.41	0.241841	0.0643518	3.7581	0.000171209	0.00048402
ENSG00000013288.4	MAN2B2	2582.8	0.44377	0.100227	4.42767	9.52558e-06	2.98788e-05
ENSG00000013293.5	SLC7A14	0.88822	0.430361	1.20693	0.356574	0.72141	0.790404
ENSG00000013297.6	CLDN11	2.79388	1.41032	0.826066	1.70727	0.0877715	0.150533
ENSG00000013306.11	SLC25A39	6964.4	0.0138551	0.127441	0.108718	0.913426	0.941204
ENSG00000013364.14	MVP	207.345	-0.444338	0.14831	-2.99601	0.00273541	0.00673204
ENSG00000013374.11	NUB1	2519.9	1.36217	0.053987	25.2315	1.80725e-140	6.20184e-139
ENSG00000013375.11	PGM3	1613.66	1.65737	0.0695221	23.8395	1.30268e-125	3.88041e-124
ENSG00000013392.6	RWDD2A	59.5127	1.21426	0.195498	6.2111	5.26146e-10	2.09804e-09
ENSG00000013441.11	CLK1	2453.56	0.653707	0.0688152	9.49946	2.10973e-21	1.2703e-20
ENSG00000013503.5	POLR3B	1847.88	0.860162	0.0490912	17.5217	9.77906e-69	1.4403e-67
ENSG00000013523.5	ANGEL1	2753.93	-2.36462	0.0635157	-37.2289	2.32268e-303	2.74337e-301
ENSG00000013561.13	RNF14	2442.56	0.18812	0.0595878	3.15702	0.00159393	0.00405712
ENSG00000013563.9	DNASE1L1	686.316	-0.233019	0.102121	-2.28179	0.0225016	0.0465695
ENSG00000013573.12	DDX11	4264.08	0.649448	0.0648998	10.0069	1.42085e-23	9.08275e-23
ENSG00000013583.4	HEBP1	411.893	0.932948	0.0967098	9.64688	5.06716e-22	3.1032e-21
ENSG00000013588.5	GPRC5A	2.19895	1.27016	0.93043	1.36513	0.172212	0.255207
ENSG00000013619.9	MAMLD1	0	NA	NA	NA	NA	NA
ENSG00000013725.10	CD6	3.91834	2.56709	0.830893	3.08956	0.00200452	0.00502954
ENSG00000013810.14	TACC3	5558.53	0.0190213	0.0885598	0.214785	0.829935	0.881191
ENSG00000014123.9	UFL1	3373.88	0.987435	0.0638567	15.4633	6.13874e-54	7.31012e-53
ENSG00000014138.4	POLA2	3338.88	0.734042	0.0546526	13.4311	3.97654e-41	3.76912e-40
ENSG00000014164.6	ZC3H3	930.868	-1.59424	0.185081	-8.61373	7.0719e-18	3.8291e-17
ENSG00000014216.11	CAPN1	4538.97	-0.688471	0.129003	-5.33688	9.45617e-08	3.36554e-07
ENSG00000014257.11	ACPP	1427.95	-0.0152409	0.0711055	-0.214342	0.83028	0.88145
ENSG00000014641.13	MDH1	12522.6	0.835336	0.0552246	15.1262	1.08869e-51	1.24955e-50
ENSG00000014824.9	SLC30A9	7590.38	0.0827787	0.0678428	1.22015	0.222406	0.312598
ENSG00000014914.15	MTMR11	8.28811	-0.506383	0.487634	-1.03845	0.299061	0.399302
ENSG00000014919.8	COX15	5317.86	0.296597	0.0443307	6.69056	2.22319e-11	9.4553e-11
ENSG00000015133.14	CCDC88C	3421.58	-0.605023	0.0973432	-6.21536	5.12081e-10	2.04437e-09
ENSG00000015153.10	YAF2	1104.31	0.821686	0.0856273	9.59607	8.30521e-22	5.05664e-21
ENSG00000015171.14	ZMYND11	3488.36	-1.33354	0.0622911	-21.4083	1.11929e-101	2.55491e-100
ENSG00000015285.6	WAS	1247.18	0.78015	0.111712	6.98356	2.87791e-12	1.26768e-11
ENSG00000015413.5	DPEP1	1.41715	-1.70069	1.09814	-1.54869	0.121456	0.195475
ENSG00000015475.14	BID	4882.5	-0.288288	0.0473331	-6.09061	1.12482e-09	4.42051e-09
ENSG00000015479.13	MATR3	42879.1	-0.0933183	0.0637853	-1.46301	0.143466	0.221011
ENSG00000015520.10	NPC1L1	0.89651	1.83844	1.26362	1.4549	0.145697	0.223985
ENSG00000015532.5	XYLT2	1070.5	-0.577243	0.129787	-4.44763	8.68223e-06	2.73094e-05
ENSG00000015568.8	RGPD5	0.227296	-1.23256	1.28784	-0.957076	0.338529	NA
ENSG00000015592.12	STMN4	0.254795	1.38261	1.30622	1.05848	0.289836	NA
ENSG00000015676.13	NUDCD3	4888.74	0.154575	0.0481584	3.20972	0.00132865	0.00341469
ENSG00000016082.10	ISL1	0.260936	1.45382	1.31815	1.10293	0.270057	NA
ENSG00000016391.6	CHDH	75.506	-6.09285	0.505551	-12.0519	1.89507e-33	1.55741e-32
ENSG00000016402.8	IL20RA	4.35458	-2.55953	0.815647	-3.13803	0.00170087	0.00430987
ENSG00000016490.11	CLCA1	0.796129	1.6675	1.25621	1.32741	0.184373	0.26872
ENSG00000016602.8	CLCA4	0.931009	3.07924	1.31761	2.33699	0.0194399	0.0409364
ENSG00000016864.12	GLT8D1	2257.77	-0.308921	0.0552607	-5.59025	2.26741e-08	8.34984e-08
ENSG00000017260.15	ATP2C1	13034.4	-1.09577	0.05785	-18.9416	5.18472e-80	8.7872e-79
ENSG00000017373.11	SRCIN1	5.02326	1.57667	0.718213	2.19527	0.0281445	0.0570433
ENSG00000017427.11	IGF1	1.54339	2.62053	1.16721	2.24512	0.0247607	0.050824
ENSG00000017483.10	SLC38A5	5666.54	-0.189674	0.0759171	-2.49844	0.012474	0.0274416
ENSG00000017621.11	MAGIX	36.3222	0.775355	0.24328	3.18709	0.00143712	0.00368042
ENSG00000017797.7	RALBP1	10022	0.825805	0.0343734	24.0245	1.54146e-127	4.6973e-126
ENSG00000018189.8	RUFY3	811.397	-2.82695	0.0821665	-34.4051	2.1164e-259	1.90807e-257
ENSG00000018236.10	CNTN1	4.32319	3.03808	0.890844	3.41034	0.000648829	0.00172634
ENSG00000018280.12	SLC11A1	16.4195	-0.442785	0.475876	-0.930462	0.352132	0.456501
ENSG00000018408.10	WWTR1	5.01108	-0.132967	0.690354	-0.192607	0.847267	0.894559
ENSG00000018510.8	AGPS	11266.8	0.115526	0.0719655	1.6053	0.108427	0.178755
ENSG00000018607.5	ZNF806	1.15417	2.23681	1.20255	1.86005	0.0628778	0.113615
ENSG00000018610.9	CXorf56	2382.53	0.260667	0.0607735	4.28916	1.79352e-05	5.51837e-05
ENSG00000018625.10	ATP1A2	1.64888	2.07672	1.08743	1.90975	0.0561649	0.103579
ENSG00000018699.7	TTC27	2957.84	0.760383	0.0536184	14.1814	1.19504e-45	1.23739e-44
ENSG00000018869.12	ZNF582	281.323	0.727822	0.102641	7.09095	1.33197e-12	5.9515e-12
ENSG00000019102.7	VSIG2	0.878951	-0.170322	1.27252	-0.133846	0.893524	0.928124
ENSG00000019144.12	PHLDB1	332.577	-5.12535	0.190964	-26.8393	1.12338e-158	4.57657e-157
ENSG00000019169.9	MARCO	0.770584	2.60499	1.3513	1.92777	0.0538832	0.0997741
ENSG00000019186.5	CYP24A1	0.411941	1.88734	1.35394	1.39396	0.16333	0.246503
ENSG00000019485.8	PRDM11	108.903	1.85533	0.196263	9.45328	3.28389e-21	1.96756e-20
ENSG00000019505.3	SYT13	0.138426	0.907324	1.21929	0.744142	0.45679	NA
ENSG00000019549.4	SNAI2	0.253855	0.0887731	1.31975	0.0672652	0.946371	NA
ENSG00000019582.10	CD74	7570.37	-5.96669	0.0713905	-83.5781	0	0
ENSG00000019991.11	HGF	314.518	-3.41611	0.12939	-26.4016	1.31275e-153	5.1551e-152
ENSG00000019995.6	ZRANB1	3370.37	0.0751114	0.0611016	1.22929	0.218965	0.308784
ENSG00000020129.11	NCDN	1681.78	-0.597076	0.146583	-4.07331	4.63494e-05	0.000137728
ENSG00000020181.13	GPR124	364.603	-7.3757	0.362248	-20.3609	3.71462e-92	7.51132e-91
ENSG00000020219.8	CCT8L1P	0.138426	0.907324	1.21929	0.744142	0.45679	NA
ENSG00000020256.15	ZFP64	737.885	0.419182	0.0934575	4.48527	7.28225e-06	2.3008e-05
ENSG00000020426.6	MNAT1	1152.95	0.0212319	0.0730549	0.290629	0.771335	0.830304
ENSG00000020577.9	SAMD4A	3.36433	2.32821	0.867878	2.68265	0.00730423	0.0168139
ENSG00000020633.14	RUNX3	4080.78	1.3476	0.078483	17.1706	4.41153e-66	6.26725e-65
ENSG00000020922.8	MRE11A	3408.04	2.1944	0.0684014	32.0811	8.08028e-226	5.67351e-224
ENSG00000021300.9	PLEKHB1	100.455	-5.90637	0.456057	-12.951	2.32059e-38	2.10275e-37
ENSG00000021355.8	SERPINB1	18307.8	-2.11822	0.051272	-41.3134	0	0
ENSG00000021461.12	CYP3A43	0.733208	-0.476309	1.31096	-0.363329	0.716359	0.786738
ENSG00000021488.8	SLC7A9	0.732158	-0.571028	1.28762	-0.443477	0.657421	0.741118
ENSG00000021574.7	SPAST	4129.58	0.468196	0.0757737	6.17888	6.45593e-10	2.56228e-09
ENSG00000021645.13	NRXN3	1.27798	1.13496	1.06573	1.06496	0.286895	0.3866
ENSG00000021762.15	OSBPL5	3347.07	3.54434	0.156736	22.6135	3.19465e-113	8.29929e-112
ENSG00000021776.6	AQR	8195.05	0.274605	0.0584176	4.70072	2.59245e-06	8.44555e-06
ENSG00000021826.10	CPS1	2008.82	4.40674	0.0844816	52.1621	0	0
ENSG00000021852.8	C8B	0.499952	1.05799	1.32948	0.795795	0.426151	0.530844
ENSG00000022267.12	FHL1	384.858	-7.6402	0.380348	-20.0874	9.51491e-90	1.85389e-88
ENSG00000022277.8	RTFDC1	6050.9	-0.23931	0.0468574	-5.10721	3.26955e-07	1.12758e-06
ENSG00000022355.10	GABRA1	1.95857	2.35602	1.03415	2.27822	0.0227133	0.0469919
ENSG00000022556.11	NLRP2	73.4008	-4.89453	0.363194	-13.4764	2.15498e-41	2.05407e-40
ENSG00000022567.5	SLC45A4	898.6	0.365776	0.0892821	4.09685	4.18803e-05	0.000124972
ENSG00000022840.11	RNF10	7382.74	-0.428232	0.0434492	-9.85592	6.46226e-23	4.06197e-22
ENSG00000022976.11	ZNF839	973.284	-0.422343	0.0688169	-6.1372	8.3991e-10	3.31794e-09
ENSG00000023041.7	ZDHHC6	4015.44	0.410842	0.0563622	7.28931	3.11539e-13	1.42588e-12
ENSG00000023171.10	GRAMD1B	1836.09	10.4741	0.427748	24.4865	2.05572e-132	6.52542e-131
ENSG00000023191.12	RNH1	5063.52	0.620901	0.152478	4.07207	4.65967e-05	0.00013845
ENSG00000023228.9	NDUFS1	8944.57	1.27787	0.0482949	26.4598	2.81684e-154	1.10901e-152
ENSG00000023287.8	RB1CC1	4907.31	-0.921664	0.0724872	-12.7149	4.89043e-37	4.30587e-36
ENSG00000023318.7	ERP44	4358.81	0.248322	0.0520272	4.77292	1.81576e-06	5.99085e-06
ENSG00000023330.10	ALAS1	6836.44	-0.340953	0.0439969	-7.74947	9.22753e-15	4.48041e-14
ENSG00000023445.9	BIRC3	400.901	-0.667699	0.0998886	-6.68444	2.31812e-11	9.84804e-11
ENSG00000023516.7	AKAP11	5294.37	1.07926	0.0699658	15.4255	1.10265e-53	1.30896e-52
ENSG00000023572.4	GLRX2	824.825	0.0769502	0.0842347	0.913522	0.360968	0.465619
ENSG00000023608.4	SNAPC1	504.861	-0.691402	0.0839544	-8.23545	1.78889e-16	9.22696e-16
ENSG00000023697.8	DERA	3253.71	0.171789	0.0573021	2.99796	0.00271797	0.00669129
ENSG00000023734.6	STRAP	9886.74	-0.328173	0.0426487	-7.69479	1.41726e-14	6.83034e-14
ENSG00000023839.6	ABCC2	104.601	-0.520487	0.160784	-3.23718	0.00120718	0.00311724
ENSG00000023892.9	DEF6	2932.14	0.121579	0.0843193	1.44189	0.149333	0.228732
ENSG00000023902.9	PLEKHO1	2988.77	-1.6368	0.0703385	-23.2703	8.85863e-120	2.47206e-118
ENSG00000023909.5	GCLM	2180.08	0.661877	0.0972585	6.80534	1.00814e-11	4.34959e-11
ENSG00000024048.6	UBR2	5541.57	0.515609	0.043228	11.9277	8.49086e-33	6.83598e-32
ENSG00000024422.7	EHD2	4.74756	-2.68286	0.809847	-3.31279	0.000923688	0.00241796
ENSG00000024526.12	DEPDC1	4589.85	-0.0654623	0.0767874	-0.852514	0.393929	0.499384
ENSG00000024862.12	CCDC28A	1430.83	-0.450226	0.0746078	-6.03457	1.59386e-09	6.2229e-09
ENSG00000025039.10	RRAGD	4689.9	0.680834	0.0553864	12.2924	9.9449e-35	8.34851e-34
ENSG00000025156.8	HSF2	1785.64	-0.0155065	0.0589695	-0.262958	0.792583	0.848405
ENSG00000025293.11	PHF20	4061.25	0.24489	0.0464457	5.2726	1.34505e-07	4.74396e-07
ENSG00000025423.7	HSD17B6	37.3854	-1.88304	0.291077	-6.46923	9.85017e-11	4.06837e-10
ENSG00000025434.14	NR1H3	220.33	-0.333659	0.114717	-2.90854	0.00363116	0.00877357
ENSG00000025708.8	TYMP	138.943	-2.40881	0.157215	-15.3218	5.46858e-53	6.40446e-52
ENSG00000025770.14	NCAPH2	3888.6	0.238828	0.125498	1.90304	0.057036	0.104949
ENSG00000025772.7	TOMM34	2918.14	-0.869822	0.0521539	-16.678	1.89495e-62	2.56644e-61
ENSG00000025796.9	SEC63	3554.21	0.10372	0.101828	1.01858	0.308402	0.408997
ENSG00000025800.9	KPNA6	7270.42	0.0817112	0.0463268	1.7638	0.0777661	0.136037
ENSG00000026025.9	VIM	3035.97	-1.57479	0.0515474	-30.5503	5.61112e-205	3.41975e-203
ENSG00000026036.16	RTEL1-TNFRSF6B	180.287	-0.0586377	0.217942	-0.269052	0.78789	0.844479
ENSG00000026103.15	FAS	723.672	1.69782	0.0793753	21.3897	1.6656e-101	3.79059e-100
ENSG00000026297.11	RNASET2	1465.49	1.77783	0.0781077	22.7613	1.10946e-114	2.94243e-113
ENSG00000026508.12	CD44	9036.81	-1.17734	0.0643399	-18.2988	8.46513e-75	1.34283e-73
ENSG00000026559.9	KCNG1	0.4027	1.87074	1.35324	1.38242	0.166843	0.249838
ENSG00000026652.9	AGPAT4	120.853	-7.1391	0.558959	-12.7721	2.3461e-37	2.07526e-36
ENSG00000026751.12	SLAMF7	0.885158	1.05992	1.20793	0.877464	0.380235	0.485417
ENSG00000026950.12	BTN3A1	1207.94	1.78964	0.0615666	29.0683	9.02771e-186	4.59268e-184
ENSG00000027001.7	MIPEP	1157.1	1.95177	0.0721318	27.0584	3.03959e-161	1.28113e-159
ENSG00000027075.9	PRKCH	44.3381	-3.25614	0.336291	-9.6825	3.57845e-22	2.20117e-21
ENSG00000027644.4	INSRR	0.785909	2.7391	1.34345	2.03886	0.0414644	0.079739
ENSG00000027697.8	IFNGR1	4891.93	-1.08252	0.0586295	-18.4637	4.04337e-76	6.53307e-75
ENSG00000027847.9	B4GALT7	896.268	-0.245386	0.134405	-1.82572	0.0678926	0.121549
ENSG00000027869.7	SH2D2A	27.9244	-5.32039	0.643068	-8.27346	1.30127e-16	6.74264e-16
ENSG00000028116.12	VRK2	1813.47	0.0707019	0.0694433	1.01812	0.308619	0.409249
ENSG00000028137.12	TNFRSF1B	2328.66	1.70025	0.0940472	18.0787	4.69023e-73	7.28467e-72
ENSG00000028203.13	VEZT	3797.15	0.149407	0.0603476	2.47577	0.0132948	0.0290625
ENSG00000028277.16	POU2F2	37.8555	-2.94875	0.319688	-9.22383	2.86675e-20	1.66587e-19
ENSG00000028310.13	BRD9	5805.37	-1.17033	0.0491389	-23.8167	2.2407e-125	6.65505e-124
ENSG00000028528.10	SNX1	4702.31	0.104619	0.0504553	2.07349	0.0381268	0.0742341
ENSG00000028839.5	TBPL1	2788.03	-2.1183	0.0499355	-42.4208	0	0
ENSG00000029153.10	ARNTL2	3508.49	-0.425554	0.0728369	-5.84256	5.14057e-09	1.95688e-08
ENSG00000029363.11	BCLAF1	28140.7	-0.113123	0.0661974	-1.70887	0.0874755	0.150313
ENSG00000029364.7	SLC39A9	7073.55	-0.782231	0.0436594	-17.9167	8.74263e-72	1.33742e-70
ENSG00000029534.15	ANK1	1.42299	0.752917	1.14228	0.659134	0.50981	0.608588
ENSG00000029559.5	IBSP	0.125848	0.87702	1.21671	0.720811	0.471026	NA
ENSG00000029639.6	TFB1M	1071.21	1.08024	0.0780705	13.8368	1.52943e-43	1.52657e-42
ENSG00000029725.12	RABEP1	4284.55	0.169508	0.0668862	2.53427	0.0112681	0.0249834
ENSG00000029993.10	HMGB3	4249.29	0.493807	0.0567381	8.70327	3.22459e-18	1.76351e-17
ENSG00000030066.9	NUP160	10337	0.475614	0.0634045	7.50126	6.32074e-14	2.97291e-13
ENSG00000030110.8	BAK1	1893.31	0.0726714	0.0832777	0.872639	0.38286	0.488236
ENSG00000030304.8	MUSK	0.641925	0.527029	1.28064	0.411536	0.68068	0.760657
ENSG00000030419.12	IKZF2	1526.65	-1.41785	0.0593125	-23.9048	2.72854e-126	8.18375e-125
ENSG00000030582.12	GRN	5599.78	-0.0554508	0.141415	-0.392115	0.694973	0.771812
ENSG00000031003.6	FAM13B	5844.12	-1.56853	0.0632682	-24.7918	1.09791e-135	3.58207e-134
ENSG00000031081.6	ARHGAP31	5.1159	0.378041	0.710297	0.532229	0.594567	0.684586
ENSG00000031544.10	NR2E3	1.3268	3.52062	1.28389	2.74215	0.00610383	0.0142552
ENSG00000031691.6	CENPQ	1254.14	0.88121	0.0806403	10.9277	8.50068e-28	6.03123e-27
ENSG00000031698.8	SARS	5373.04	-0.334792	0.0474924	-7.04939	1.79708e-12	7.98867e-12
ENSG00000031823.10	RANBP3	2594.57	-0.462475	0.0901729	-5.12876	2.91653e-07	1.0072e-06
ENSG00000032219.14	ARID4A	2510.3	0.26489	0.0621059	4.26514	1.99778e-05	6.12398e-05
ENSG00000032389.8	TSSC1	3135.48	-0.591379	0.0632364	-9.35187	8.6108e-21	5.08423e-20
ENSG00000032444.11	PNPLA6	2457.67	-0.779723	0.162369	-4.80217	1.56956e-06	5.19996e-06
ENSG00000032742.13	IFT88	936.799	0.390471	0.0709597	5.50272	3.73972e-08	1.36089e-07
ENSG00000033011.7	ALG1	1978.22	1.02942	0.0654576	15.7265	9.9571e-56	1.21564e-54
ENSG00000033030.9	ZCCHC8	2218.93	0.642443	0.0575642	11.1605	6.36637e-29	4.64788e-28
ENSG00000033050.3	ABCF2	5877.58	0.94027	0.0450766	20.8594	1.2526e-96	2.68996e-95
ENSG00000033100.10	CHPF2	3142.12	0.997831	0.11869	8.40705	4.20458e-17	2.2194e-16
ENSG00000033122.14	LRRC7	2.47195	2.22475	0.928752	2.39542	0.0166012	0.0355183
ENSG00000033170.12	FUT8	922.108	-0.629447	0.0715999	-8.79117	1.48014e-18	8.16808e-18
ENSG00000033178.8	UBA6	12504.7	-0.217715	0.0597983	-3.64083	0.000271761	0.000752511
ENSG00000033327.8	GAB2	2007.66	-2.63668	0.058421	-45.1323	0	0
ENSG00000033627.10	ATP6V0A1	420.387	-2.8632	0.104174	-27.4848	2.66599e-166	1.17231e-164
ENSG00000033800.9	PIAS1	3392.81	0.137173	0.0566468	2.42154	0.0154547	0.0332734
ENSG00000033867.12	SLC4A7	7374.8	0.575798	0.0770296	7.47503	7.71891e-14	3.61596e-13
ENSG00000034053.10	APBA2	1.45908	3.64829	1.27292	2.86607	0.00415598	0.00996971
ENSG00000034063.9	UHRF1	5005.02	0.738492	0.106219	6.95253	3.58786e-12	1.57404e-11
ENSG00000034152.14	MAP2K3	1128.28	0.985308	0.0881873	11.1729	5.53459e-29	4.05032e-28
ENSG00000034239.6	EFCAB1	0.138426	0.907324	1.21929	0.744142	0.45679	NA
ENSG00000034510.4	TMSB10	16675.8	-0.608855	0.049771	-12.2331	2.0678e-34	1.7273e-33
ENSG00000034533.7	ASTE1	786.99	0.463194	0.0672027	6.89249	5.48238e-12	2.39005e-11
ENSG00000034677.7	RNF19A	2084.11	-0.694565	0.0688023	-10.0951	5.80826e-24	3.75706e-23
ENSG00000034693.10	PEX3	1407.4	0.136116	0.0759586	1.79198	0.0731363	0.129447
ENSG00000034713.3	GABARAPL2	2191.85	-0.538536	0.073508	-7.32622	2.36731e-13	1.08758e-12
ENSG00000034971.10	MYOC	0	NA	NA	NA	NA	NA
ENSG00000035115.17	SH3YL1	867.205	-0.567854	0.0707404	-8.0273	9.96417e-16	5.00392e-15
ENSG00000035141.3	FAM136A	6091.47	0.0241752	0.0477394	0.506399	0.612576	0.700951
ENSG00000035403.12	VCL	6008.1	-0.126663	0.0383127	-3.30605	0.000946222	0.00247334
ENSG00000035499.8	DEPDC1B	2563.28	-1.25857	0.0696097	-18.0804	4.54659e-73	7.06519e-72
ENSG00000035664.7	DAPK2	20.464	-0.962186	0.353763	-2.71986	0.00653096	0.0151806
ENSG00000035681.3	NSMAF	5910.92	-1.03475	0.0596827	-17.3375	2.45142e-67	3.54711e-66
ENSG00000035687.9	ADSS	6720.35	-0.115118	0.0640017	-1.79867	0.0720716	0.127828
ENSG00000035720.3	STAP1	1721.94	-3.65655	0.0753025	-48.5581	0	0
ENSG00000035862.8	TIMP2	5084.2	-6.12676	0.0796181	-76.9518	0	0
ENSG00000035928.10	RFC1	8979.7	-0.182761	0.066786	-2.73652	0.00620926	0.0144914
ENSG00000036054.8	TBC1D23	3743.32	0.169812	0.0671283	2.52967	0.0114171	0.025288
ENSG00000036257.8	CUL3	5049.75	0.681942	0.0668748	10.1973	2.03873e-24	1.33318e-23
ENSG00000036448.5	MYOM2	74.6499	-4.10974	0.301591	-13.6268	2.77328e-42	2.68884e-41
ENSG00000036473.6	OTC	0.629758	0.542915	1.26597	0.428854	0.66803	0.750262
ENSG00000036530.4	CYP46A1	0.62254	0.51475	1.26646	0.406446	0.684415	0.763096
ENSG00000036549.8	ZZZ3	8475.45	0.0778827	0.0639674	1.21754	0.2234	0.313732
ENSG00000036565.10	SLC18A1	4.88735	0.217065	0.738642	0.29387	0.768857	0.828215
ENSG00000036672.11	USP2	158.045	-3.67428	0.187168	-19.6309	8.4221e-86	1.55921e-84
ENSG00000036828.9	CASR	1.98533	2.93897	1.13695	2.58495	0.00973925	0.0218561
ENSG00000037042.8	TUBG2	99.1751	-2.68204	0.256502	-10.4562	1.37201e-25	9.20911e-25
ENSG00000037241.3	RPL26L1	1399.3	-0.00416644	0.0587138	-0.0709619	0.943428	0.95725
ENSG00000037280.11	FLT4	59.4652	7.16375	0.748829	9.5666	1.10477e-21	6.70233e-21
ENSG00000037474.10	NSUN2	11824.9	-0.589947	0.0428507	-13.7675	3.99769e-43	3.95268e-42
ENSG00000037637.6	FBXO42	2292.24	-0.187948	0.0510246	-3.68347	0.000230081	0.000641998
ENSG00000037749.7	MFAP3	4766.84	0.292984	0.0630199	4.64907	3.33443e-06	1.07752e-05
ENSG00000037757.9	MRI1	2692.84	1.39658	0.0763949	18.2811	1.17074e-74	1.85233e-73
ENSG00000037897.12	METTL1	984.639	0.656872	0.0707669	9.28219	1.66032e-20	9.73729e-20
ENSG00000037965.4	HOXC8	0.377543	1.42221	1.3037	1.09091	0.275313	NA
ENSG00000038002.4	AGA	1229.46	1.39522	0.0732604	19.0447	7.26748e-81	1.24838e-79
ENSG00000038210.9	PI4K2B	4071.05	0.879261	0.0816821	10.7644	5.06806e-27	3.53084e-26
ENSG00000038219.8	BOD1L1	7897.88	1.18078	0.0588727	20.0564	1.7742e-89	3.44365e-88
ENSG00000038274.12	MAT2B	6710.84	0.322072	0.075102	4.28846	1.79917e-05	5.53519e-05
ENSG00000038295.3	TLL1	1.32151	2.42444	1.17751	2.05896	0.0394984	0.0765428
ENSG00000038358.10	EDC4	5745.31	-0.192383	0.105369	-1.8258	0.0678807	0.121539
ENSG00000038382.13	TRIO	10291.5	-2.22195	0.0502651	-44.2047	0	0
ENSG00000038427.11	VCAN	21.4459	-3.02233	0.419081	-7.21181	5.5213e-13	2.50373e-12
ENSG00000038532.10	CLEC16A	1470.65	1.3824	0.0731504	18.898	1.18394e-79	1.99327e-78
ENSG00000038945.10	MSR1	0.886974	1.85642	1.2524	1.48229	0.138264	0.216259
ENSG00000039068.14	CDH1	2.11362	3.06183	1.12263	2.72738	0.00638391	0.0148694
ENSG00000039123.11	SKIV2L2	9989.4	-0.890581	0.0595474	-14.9558	1.42714e-50	1.61311e-49
ENSG00000039139.9	DNAH5	5.16994	1.48026	0.658946	2.2464	0.0246783	0.0506685
ENSG00000039319.12	ZFYVE16	1141.07	-1.39547	0.0679851	-20.5261	1.25866e-93	2.60564e-92
ENSG00000039523.13	FAM65A	275.473	-1.02408	0.115588	-8.85972	8.02167e-19	4.46392e-18
ENSG00000039537.9	C6	1.69894	1.95785	1.17806	1.66192	0.0965282	0.161772
ENSG00000039560.9	RAI14	6.14401	-1.30505	0.608337	-2.14527	0.0319312	0.0633657
ENSG00000039600.6	SOX30	0.760345	1.57891	1.29102	1.22299	0.221333	0.311475
ENSG00000039650.5	PNKP	1250.35	0.00318293	0.124052	0.025658	0.97953	0.983403
ENSG00000039987.2	BEST2	1.21893	0.142124	1.08638	0.130824	0.895915	0.929783
ENSG00000040199.14	PHLPP2	523.867	-3.11096	0.106396	-29.2395	6.10024e-188	3.21614e-186
ENSG00000040275.12	SPDL1	2750.18	0.492555	0.0639695	7.69984	1.36238e-14	6.57208e-14
ENSG00000040341.13	STAU2	2149.58	-0.462802	0.0680591	-6.8	1.04621e-11	4.51192e-11
ENSG00000040487.8	PQLC2	324.556	-1.8289	0.125059	-14.6243	1.96498e-48	2.15159e-47
ENSG00000040531.10	CTNS	488.739	-0.239131	0.0910104	-2.62751	0.00860128	0.0195558
ENSG00000040608.9	RTN4R	162.754	-4.99024	0.269338	-18.5278	1.23199e-76	2.00655e-75
ENSG00000040633.8	PHF23	1664.89	-0.28745	0.0579039	-4.96425	6.8966e-07	2.33511e-06
ENSG00000040731.6	CDH10	0.767326	1.69398	1.25408	1.35077	0.176768	0.260931
ENSG00000040933.11	INPP4A	3026.11	1.18164	0.0557982	21.1771	1.55359e-99	3.47087e-98
ENSG00000041353.5	RAB27B	46.2443	-4.92072	0.476231	-10.3326	5.01627e-25	3.32885e-24
ENSG00000041357.11	PSMA4	13379.2	0.0520644	0.0708889	0.734451	0.462674	0.565226
ENSG00000041515.11	MYO16	3.31427	3.75183	1.03985	3.60804	0.000308524	0.000848373
ENSG00000041802.6	LSG1	6597.99	-0.260331	0.0454103	-5.73287	9.87467e-09	3.70352e-08
ENSG00000041880.10	PARP3	387.987	-3.27847	0.129053	-25.404	2.27554e-142	8.02576e-141
ENSG00000041982.10	TNC	0.912289	2.92453	1.3333	2.19346	0.0282744	0.0572609
ENSG00000041988.11	THAP3	713.233	-0.734213	0.10268	-7.15052	8.64497e-13	3.88953e-12
ENSG00000042062.7	FAM65C	0.6518	1.29055	1.31977	0.977864	0.328141	0.430603
ENSG00000042088.9	TDP1	4199.5	0.769194	0.0568877	13.5213	1.17132e-41	1.12138e-40
ENSG00000042286.10	AIFM2	348.928	-5.23807	0.200102	-26.1769	4.86588e-151	1.86045e-149
ENSG00000042304.6	C2orf83	0.125848	0.87702	1.21671	0.720811	0.471026	NA
ENSG00000042317.12	SPATA7	446.901	-0.00447559	0.092983	-0.0481334	0.96161	0.968891
ENSG00000042429.6	MED17	2011.19	1.28998	0.0617168	20.9017	5.17221e-97	1.11387e-95
ENSG00000042445.9	RETSAT	1504.04	0.317895	0.0611526	5.19839	2.01021e-07	7.01283e-07
ENSG00000042493.11	CAPG	2469.19	6.31282	0.139565	45.232	0	0
ENSG00000042753.7	AP2S1	5091.51	-0.564591	0.0907543	-6.22109	4.93713e-10	1.97285e-09
ENSG00000042781.8	USH2A	3.08466	1.87904	0.863358	2.17643	0.029523	0.0593635
ENSG00000042813.3	ZPBP	1.0371	1.23248	1.26243	0.976276	0.328928	0.431375
ENSG00000042832.7	TG	4.37085	0.868856	0.683834	1.27057	0.203883	0.291099
ENSG00000042980.8	ADAM28	79.3272	1.48218	0.210131	7.0536	1.7435e-12	7.7539e-12
ENSG00000043039.5	BARX2	2.17668	1.22133	0.956959	1.27627	0.201862	0.288646
ENSG00000043093.9	DCUN1D1	8056.35	-0.375643	0.0890458	-4.21854	2.45887e-05	7.48093e-05
ENSG00000043143.16	PHF15	2752.09	-1.29765	0.0913448	-14.2061	8.39667e-46	8.73283e-45
ENSG00000043355.6	ZIC2	0.79902	2.73698	1.34396	2.0365	0.0416999	0.0801009
ENSG00000043462.7	LCP2	2426.23	0.128659	0.0467859	2.74995	0.00596043	0.013946
ENSG00000043514.11	TRIT1	2377.93	-0.450252	0.0564356	-7.97815	1.48544e-15	7.42183e-15
ENSG00000043591.4	ADRB1	51.607	-5.22973	0.475377	-11.0012	3.76977e-28	2.70042e-27
ENSG00000044012.3	GUCA2B	0.135089	0.899545	1.21864	0.738155	0.46042	NA
ENSG00000044090.4	CUL7	1945.65	-0.563518	0.0870163	-6.476	9.41841e-11	3.8932e-10
ENSG00000044115.16	CTNNA1	4975.59	-7.88398	0.134896	-58.4448	0	0
ENSG00000044446.7	PHKA2	2933.5	0.546205	0.0469198	11.6413	2.5424e-31	1.9774e-30
ENSG00000044459.10	CNTLN	1079.21	-0.120466	0.071725	-1.67955	0.0930441	0.156787
ENSG00000044524.6	EPHA3	1.15793	2.16383	1.23206	1.75627	0.0790431	0.137647
ENSG00000044574.7	HSPA5	13798.9	0.388392	0.0475616	8.16609	3.18558e-16	1.62958e-15
ENSG00000046604.8	DSG2	1358.14	9.92102	0.416239	23.8349	1.45116e-125	4.31847e-124
ENSG00000046647.9	GEMIN8	600.139	1.02585	0.0730517	14.0428	8.52219e-45	8.69714e-44
ENSG00000046651.10	OFD1	1668.23	-0.110567	0.0677492	-1.632	0.102679	0.170719
ENSG00000046653.10	GPM6B	2.38025	1.12385	0.871236	1.28995	0.197068	0.282853
ENSG00000046774.9	MAGEC2	0.512689	2.11989	1.35939	1.55945	0.118891	0.192169
ENSG00000046889.14	PREX2	1.44379	2.5129	1.1823	2.12544	0.0335499	0.0661383
ENSG00000047056.10	WDR37	1366.74	-1.02065	0.0589059	-17.3268	2.95152e-67	4.25659e-66
ENSG00000047188.11	YTHDC2	2496.32	-0.394584	0.0727188	-5.42617	5.75773e-08	2.07271e-07
ENSG00000047230.10	CTPS2	1352.39	1.64554	0.0621302	26.4853	1.43232e-154	5.64647e-153
ENSG00000047249.12	ATP6V1H	1632.45	-0.422317	0.0636403	-6.63599	3.22322e-11	1.35928e-10
ENSG00000047315.10	POLR2B	15972.9	-0.137161	0.0608968	-2.25236	0.0242996	0.049983
ENSG00000047346.8	FAM214A	617.372	0.132156	0.0758033	1.7434	0.0812632	0.141037
ENSG00000047365.7	ARAP2	1003.63	0.429212	0.0762536	5.62875	1.81521e-08	6.72278e-08
ENSG00000047410.9	TPR	22327.4	0.50832	0.0572782	8.87457	7.0203e-19	3.91383e-18
ENSG00000047457.9	CP	2.17266	2.38397	1.0967	2.17376	0.0297234	0.0597311
ENSG00000047578.8	KIAA0556	870.818	1.57688	0.0842626	18.7139	3.81702e-78	6.31124e-77
ENSG00000047579.15	DTNBP1	298.128	-0.193249	0.103407	-1.86883	0.061647	0.111634
ENSG00000047597.5	XK	351.731	10.514	0.887367	11.8485	2.19124e-32	1.75029e-31
ENSG00000047617.10	ANO2	1.43112	3.59152	1.2802	2.80543	0.0050249	0.0119033
ENSG00000047621.7	C12orf4	2202.05	0.151384	0.0715774	2.11497	0.0344324	0.0677377
ENSG00000047634.10	SCML1	13.1737	5.64992	0.908652	6.21791	5.03811e-10	2.01267e-09
ENSG00000047644.13	WWC3	42.1731	6.36614	0.68003	9.36155	7.85771e-21	4.64767e-20
ENSG00000047648.17	ARHGAP6	0.946154	2.92002	1.33472	2.18774	0.0286888	0.0579578
ENSG00000047662.4	FAM184B	3.0679	-0.593975	0.7808	-0.760726	0.446821	0.55034
ENSG00000047849.17	MAP4	5522.42	-0.599809	0.0511681	-11.7223	9.79332e-32	7.6975e-31
ENSG00000047932.9	GOPC	5933.51	0.706981	0.0730114	9.68317	3.55528e-22	2.1878e-21
ENSG00000047936.6	ROS1	0.905514	1.83092	1.26783	1.44413	0.148703	0.227916
ENSG00000048028.7	USP28	2538.65	0.2482	0.0631173	3.93236	8.41169e-05	0.000244263
ENSG00000048052.17	HDAC9	26.531	-1.0595	0.30813	-3.43848	0.00058498	0.00156328
ENSG00000048140.13	TSPAN17	524.243	-2.83227	0.104308	-27.1529	2.33922e-162	9.9976e-161
ENSG00000048162.15	NOP16	4463.25	0.0558343	0.0626521	0.89118	0.372832	0.477868
ENSG00000048342.11	CC2D2A	772.629	-6.04359	0.183321	-32.9673	2.39319e-238	1.86994e-236
ENSG00000048392.7	RRM2B	3111.64	-1.31155	0.0845943	-15.504	3.25927e-54	3.89947e-53
ENSG00000048405.5	ZNF800	3691.83	0.0362801	0.0724622	0.500677	0.616599	0.704707
ENSG00000048462.6	TNFRSF17	0	NA	NA	NA	NA	NA
ENSG00000048471.9	SNX29	656.707	1.59175	0.0774239	20.5589	6.40431e-94	1.33487e-92
ENSG00000048540.10	LMO3	7.20147	-0.654303	0.633609	-1.03266	0.301762	0.401941
ENSG00000048544.5	MRPS10	5450.74	0.213731	0.0562716	3.79821	0.000145743	0.000414294
ENSG00000048545.9	GUCA1A	0	NA	NA	NA	NA	NA
ENSG00000048649.9	RSF1	4307.51	-0.0605255	0.064102	-0.944206	0.345064	0.448809
ENSG00000048707.9	VPS13D	5924.13	1.0217	0.0558711	18.2868	1.05456e-74	1.67112e-73
ENSG00000048740.13	CELF2	10684.6	-0.809791	0.0478048	-16.9395	2.30032e-64	3.19788e-63
ENSG00000048828.12	FAM120A	17639.9	-0.228473	0.0438104	-5.21504	1.83774e-07	6.42441e-07
ENSG00000048991.12	R3HDM1	2405.31	0.0382694	0.0712117	0.537404	0.590989	0.681291
ENSG00000049089.9	COL9A2	225.95	-0.879025	0.156497	-5.61688	1.94437e-08	7.19501e-08
ENSG00000049130.9	KITLG	252.514	-0.196319	0.126741	-1.54897	0.121388	0.195396
ENSG00000049167.9	ERCC8	1073.74	-0.995711	0.0736571	-13.5182	1.22138e-41	1.16857e-40
ENSG00000049192.10	ADAMTS6	30.8273	-2.41836	0.343683	-7.03661	1.96976e-12	8.74609e-12
ENSG00000049239.8	H6PD	1147.99	-0.161205	0.0690743	-2.33379	0.0196068	0.0412552
ENSG00000049245.8	VAMP3	3573.34	-0.81206	0.0542816	-14.9601	1.3377e-50	1.51256e-49
ENSG00000049246.10	PER3	227.643	-1.98728	0.127549	-15.5805	9.87433e-55	1.18839e-53
ENSG00000049247.9	UTS2	50.6657	-6.15584	0.626895	-9.81958	9.27303e-23	5.80121e-22
ENSG00000049249.4	TNFRSF9	5.10024	3.30508	0.865581	3.81833	0.000134355	0.000383533
ENSG00000049283.13	EPN3	1.43458	-1.15463	1.02904	-1.12205	0.261842	0.358596
ENSG00000049319.2	SRD5A2	2.60619	0.782625	0.841429	0.930115	0.352312	0.456715
ENSG00000049323.11	LTBP1	25.0657	-2.80169	0.386692	-7.24528	4.31542e-13	1.96421e-12
ENSG00000049449.4	RCN1	3236.63	-2.50655	0.0615461	-40.7263	0	0
ENSG00000049540.12	ELN	1.93868	1.72304	1.11776	1.54151	0.123192	0.197747
ENSG00000049541.6	RFC2	4472.93	0.782849	0.0411888	19.0064	1.51088e-80	2.58222e-79
ENSG00000049618.17	ARID1B	3290.35	1.23322	0.0592423	20.8165	3.06972e-96	6.56907e-95
ENSG00000049656.9	CLPTM1L	16283.7	-1.47766	0.0652862	-22.6336	2.02359e-113	5.27952e-112
ENSG00000049759.12	NEDD4L	23.4952	1.73907	0.333243	5.21863	1.80255e-07	6.30571e-07
ENSG00000049768.10	FOXP3	2.77131	0.62548	0.840587	0.744099	0.456817	0.559579
ENSG00000049769.8	PPP1R3F	54.4079	-2.79888	0.290483	-9.63527	5.67423e-22	3.46862e-21
ENSG00000049860.9	HEXB	2070.85	-1.96145	0.0819615	-23.9314	1.4436e-126	4.33834e-125
ENSG00000049883.10	PTCD2	679.056	-1.2486	0.0779671	-16.0144	1.01379e-57	1.2729e-56
ENSG00000050030.9	KIAA2022	1.03909	1.29166	1.1753	1.09901	0.271765	0.369759
ENSG00000050130.13	JKAMP	2666.68	0.0926021	0.0689153	1.34371	0.179043	0.261991
ENSG00000050165.13	DKK3	0.270177	1.19731	1.26517	0.946364	0.343963	NA
ENSG00000050327.10	ARHGEF5	21.3571	6.28287	0.882117	7.12249	1.05993e-12	4.75268e-12
ENSG00000050344.8	NFE2L3	1290.08	-1.30098	0.0724604	-17.9543	4.43762e-72	6.8159e-71
ENSG00000050393.7	MCUR1	3232.06	-0.180327	0.0662216	-2.72308	0.00646764	0.0150484
ENSG00000050405.9	LIMA1	1582	-0.0660202	0.0652363	-1.01202	0.31153	0.412356
ENSG00000050426.11	LETMD1	3806.53	0.410062	0.0548176	7.48048	7.4053e-14	3.47439e-13
ENSG00000050438.12	SLC4A8	39.5984	2.1967	0.28603	7.67997	1.59129e-14	7.6521e-14
ENSG00000050555.13	LAMC3	17.6018	-4.40706	0.62364	-7.06667	1.58692e-12	7.06682e-12
ENSG00000050628.16	PTGER3	2.06656	1.93072	0.987347	1.95546	0.050529	0.094366
ENSG00000050730.11	TNIP3	1.43996	2.55651	1.16849	2.18788	0.0286786	0.0579486
ENSG00000050748.13	MAPK9	2608.56	0.137766	0.0627823	2.19434	0.0282108	0.0571512
ENSG00000050767.11	COL23A1	2229.61	3.63076	0.13386	27.1236	5.19183e-162	2.20656e-160
ENSG00000050820.12	BCAR1	0.752346	0.143235	1.22995	0.116456	0.907291	0.937629
ENSG00000051009.6	FAM160A2	894.659	1.05698	0.10962	9.64221	5.30337e-22	3.24582e-21
ENSG00000051108.10	HERPUD1	1443.07	1.25278	0.0587887	21.3099	9.18944e-101	2.07737e-99
ENSG00000051128.14	HOMER3	572.115	-5.85978	0.187143	-31.3117	3.23244e-215	2.09134e-213
ENSG00000051180.12	RAD51	2009.83	0.769785	0.0627557	12.2664	1.3725e-34	1.14933e-33
ENSG00000051341.9	POLQ	6087.43	0.796137	0.061383	12.97	1.81058e-38	1.64354e-37
ENSG00000051382.4	PIK3CB	2896.37	-0.632073	0.113791	-5.55467	2.78132e-08	1.01832e-07
ENSG00000051523.6	CYBA	6004.42	-1.48336	0.167174	-8.87313	7.11207e-19	3.96426e-18
ENSG00000051596.5	THOC3	1433.34	1.04447	0.0610356	17.1124	1.19855e-65	1.69719e-64
ENSG00000051620.6	HEBP2	4570.29	-1.12452	0.0535502	-20.9993	6.66263e-98	1.45229e-96
ENSG00000051825.10	MPHOSPH9	10037.3	-0.501576	0.0577317	-8.68805	3.68703e-18	2.01389e-17
ENSG00000052126.10	PLEKHA5	374.732	-4.34812	0.154632	-28.1191	5.72867e-174	2.68569e-172
ENSG00000052344.11	PRSS8	1.18885	3.36988	1.29634	2.59953	0.00933504	0.0210451
ENSG00000052723.7	SIKE1	5449.41	1.29439	0.0690181	18.7543	1.78512e-78	2.97094e-77
ENSG00000052749.9	RRP12	6842.33	0.254892	0.0987164	2.58206	0.0098213	0.022024
ENSG00000052795.8	FNIP2	1825.04	-0.232406	0.0487576	-4.76655	1.87403e-06	6.17578e-06
ENSG00000052802.8	MSMO1	5051.73	-0.965366	0.0628427	-15.3616	2.96021e-53	3.48018e-52
ENSG00000052841.10	TTC17	6913.73	0.486721	0.0542623	8.96979	2.97087e-19	1.67495e-18
ENSG00000052850.5	ALX4	0.125848	0.87702	1.21671	0.720811	0.471026	NA
ENSG00000053108.12	FSTL4	0.373324	0.497926	1.34982	0.368884	0.712214	NA
ENSG00000053254.11	FOXN3	3585.15	-1.16135	0.0611318	-18.9974	1.79114e-80	3.05437e-79
ENSG00000053328.8	METTL24	0.826945	-1.58311	1.2749	-1.24176	0.214327	0.303355
ENSG00000053371.8	AKR7A2	2400.51	-0.204682	0.0679253	-3.01335	0.00258384	0.00638118
ENSG00000053372.4	MRTO4	8506.29	0.0846691	0.0373905	2.26445	0.0235462	0.0485569
ENSG00000053438.7	NNAT	0.128947	0.881431	1.21709	0.72421	0.468937	NA
ENSG00000053501.8	USE1	945.848	0.232123	0.0952978	2.43576	0.0148604	0.0321085
ENSG00000053524.7	MCF2L2	347.475	-5.80523	0.226824	-25.5936	1.79922e-144	6.4201e-143
ENSG00000053702.10	NRIP2	7.84974	3.64268	0.739341	4.92693	8.35313e-07	2.81545e-06
ENSG00000053747.11	LAMA3	4.14662	0.565735	0.745804	0.758557	0.448117	0.551514
ENSG00000053770.7	AP5M1	4915.94	1.11324	0.0696977	15.9725	1.98765e-57	2.48542e-56
ENSG00000053900.6	ANAPC4	3449.86	0.0601906	0.0692203	0.869551	0.384546	0.49002
ENSG00000053918.11	KCNQ1	37.8596	-4.62439	0.477136	-9.69198	3.26152e-22	2.0111e-21
ENSG00000054116.7	TRAPPC3	3276.33	0.0943696	0.0486885	1.93823	0.0525952	0.097668
ENSG00000054118.9	THRAP3	18436.7	0.153019	0.0454078	3.3699	0.000751968	0.00198585
ENSG00000054148.13	PHPT1	2177.25	-0.669493	0.122669	-5.45772	4.82293e-08	1.74465e-07
ENSG00000054179.7	ENTPD2	0.251695	1.17838	1.2617	0.933966	0.350322	NA
ENSG00000054219.9	LY75	1118.27	-0.576943	0.08846	-6.52207	6.93433e-11	2.88652e-10
ENSG00000054267.16	ARID4B	4030.08	-0.135942	0.0707597	-1.92117	0.0547102	0.10117
ENSG00000054277.8	OPN3	1322.82	-0.400172	0.0619182	-6.46291	1.02708e-10	4.23923e-10
ENSG00000054282.11	SDCCAG8	2075.58	-0.852771	0.0616426	-13.8341	1.58679e-43	1.58279e-42
ENSG00000054356.9	PTPRN	1.554	2.57019	1.19879	2.14399	0.0320334	0.0635434
ENSG00000054392.8	HHAT	110.945	-4.13896	0.258981	-15.9817	1.71387e-57	2.1466e-56
ENSG00000054523.12	KIF1B	503.624	0.886756	0.0829183	10.6943	1.08194e-26	7.48298e-26
ENSG00000054598.5	FOXC1	112.84	-6.49319	0.48218	-13.4663	2.46878e-41	2.35097e-40
ENSG00000054611.9	TBC1D22A	1556.92	0.0149733	0.0943376	0.15872	0.87389	0.914242
ENSG00000054654.11	SYNE2	90.5826	4.96448	0.325602	15.2471	1.72195e-52	2.00355e-51
ENSG00000054690.9	PLEKHH1	1.94628	-0.800354	0.965199	-0.829212	0.406985	0.511995
ENSG00000054793.9	ATP9A	796.64	-7.76067	0.289003	-26.8533	7.72762e-159	3.16086e-157
ENSG00000054796.8	SPO11	0.264036	1.40579	1.30977	1.07331	0.283133	NA
ENSG00000054803.3	CBLN4	1.56397	2.68784	1.14361	2.35031	0.0187578	0.0397225
ENSG00000054938.11	CHRDL2	1.86512	3.91898	1.25324	3.12708	0.00176552	0.0044622
ENSG00000054965.6	FAM168A	1770.98	-0.848142	0.0653743	-12.9736	1.72669e-38	1.56833e-37
ENSG00000054967.8	RELT	3026.23	0.273355	0.116428	2.34785	0.0188822	0.0399553
ENSG00000054983.12	GALC	1369.47	-2.00116	0.0815808	-24.5298	7.10581e-133	2.26265e-131
ENSG00000055044.6	NOP58	9393.62	0.875088	0.0627345	13.9491	3.18792e-44	3.21887e-43
ENSG00000055070.12	SZRD1	7691.45	-0.563191	0.0628848	-8.95592	3.36925e-19	1.89535e-18
ENSG00000055118.10	KCNH2	705.381	-6.86053	0.234266	-29.2852	1.60159e-188	8.47311e-187
ENSG00000055130.11	CUL1	5047.03	0.885236	0.0545069	16.2408	2.59483e-59	3.33779e-58
ENSG00000055147.13	FAM114A2	2079.19	1.11988	0.071037	15.7648	5.43793e-56	6.66842e-55
ENSG00000055163.14	CYFIP2	3260.77	-1.16263	0.0495745	-23.4523	1.25261e-121	3.55077e-120
ENSG00000055208.13	TAB2	2556.02	-0.206686	0.0750538	-2.75384	0.00589001	0.013795
ENSG00000055211.8	GINM1	2114.2	-0.689995	0.0602992	-11.4429	2.55334e-30	1.93751e-29
ENSG00000055332.12	EIF2AK2	4452.76	-0.632821	0.0629452	-10.0535	8.86383e-24	5.69606e-23
ENSG00000055483.15	USP36	5155.65	-0.514919	0.0607633	-8.47417	2.36768e-17	1.25917e-16
ENSG00000055609.13	KMT2C	7534.74	2.11302	0.0609446	34.6712	2.13884e-263	1.97506e-261
ENSG00000055732.8	MCOLN3	41.3207	-4.76231	0.476899	-9.98597	1.75569e-23	1.1188e-22
ENSG00000055813.5	CCDC85A	0.270177	1.19731	1.26517	0.946364	0.343963	NA
ENSG00000055917.11	PUM2	8746.16	0.298915	0.0684886	4.36444	1.27448e-05	3.96461e-05
ENSG00000055950.12	MRPL43	1948.42	-0.596057	0.0693702	-8.59241	8.51663e-18	4.59585e-17
ENSG00000055955.11	ITIH4	9.56583	-0.336001	0.468518	-0.717158	0.473277	0.575069
ENSG00000055957.6	ITIH1	3.82658	-0.437166	0.712563	-0.613512	0.539538	0.635685
ENSG00000056050.6	C4orf27	1355.2	0.286471	0.0687858	4.16468	3.11789e-05	9.40988e-05
ENSG00000056097.11	ZFR	13104.5	-0.632773	0.0520969	-12.1461	6.0175e-34	4.98562e-33
ENSG00000056277.11	ZNF280C	1649.11	0.360555	0.0533632	6.75663	1.41237e-11	6.0559e-11
ENSG00000056291.13	NPFFR2	0.260936	1.45382	1.31815	1.10293	0.270057	NA
ENSG00000056487.11	PHF21B	0.39632	1.81972	1.35024	1.3477	0.177756	0.261301
ENSG00000056558.6	TRAF1	59.4177	-0.0429421	0.213547	-0.20109	0.840628	0.889467
ENSG00000056586.11	RC3H2	7240.93	-0.0547058	0.0559775	-0.977282	0.32843	0.430925
ENSG00000056661.9	PCGF2	0.889739	1.08928	1.18738	0.917381	0.358943	0.463655
ENSG00000056736.5	IL17RB	15.0164	-3.10141	0.545613	-5.68426	1.31382e-08	4.89257e-08
ENSG00000056972.14	TRAF3IP2	792.521	1.01349	0.0779397	13.0036	1.16777e-38	1.06352e-37
ENSG00000056998.14	GYG2	8.69342	-4.34023	0.859954	-5.04705	4.48681e-07	1.53625e-06
ENSG00000057019.11	DCBLD2	2089.97	-0.955765	0.0731733	-13.0617	5.45195e-39	4.99811e-38
ENSG00000057149.10	SERPINB3	1.04428	3.21124	1.30892	2.45336	0.0141529	0.0307136
ENSG00000057252.8	SOAT1	3095.06	-1.80102	0.0622739	-28.921	6.49869e-184	3.24116e-182
ENSG00000057294.9	PKP2	340.368	-1.60695	0.100174	-16.0417	6.53477e-58	8.23549e-57
ENSG00000057468.6	MSH4	16.7169	0.436311	0.347456	1.25573	0.209213	0.297372
ENSG00000057593.9	F7	0.254795	1.38261	1.30622	1.05848	0.289836	NA
ENSG00000057608.12	GDI2	22162.8	-0.754342	0.0551333	-13.6822	1.29791e-42	1.26888e-41
ENSG00000057657.10	PRDM1	278.652	2.19916	0.129612	16.9673	1.43469e-64	2.0018e-63
ENSG00000057663.8	ATG5	3146.42	0.158811	0.0589556	2.69373	0.00706566	0.0163066
ENSG00000057704.6	TMCC3	1.524	0.548273	1.0527	0.520825	0.602488	0.691902
ENSG00000057757.5	PITHD1	3850.73	0.426305	0.0434506	9.81125	1.0071e-22	6.29266e-22
ENSG00000057935.9	MTA3	665.846	-1.05393	0.0737452	-14.2915	2.47101e-46	2.59563e-45
ENSG00000058056.4	USP13	4080.1	-1.00671	0.0680891	-14.7852	1.82586e-49	2.03212e-48
ENSG00000058063.11	ATP11B	10394	0.979808	0.0627392	15.6172	5.56349e-55	6.72763e-54
ENSG00000058085.10	LAMC2	1.33013	3.53522	1.28187	2.75785	0.00581825	0.0136416
ENSG00000058091.12	CDK14	3133.61	-0.312417	0.0654209	-4.77549	1.79272e-06	5.91613e-06
ENSG00000058262.5	SEC61A1	18319.3	0.0994818	0.0438756	2.26736	0.0233682	0.0482028
ENSG00000058272.11	PPP1R12A	7814.79	0.484283	0.0572335	8.46154	2.63878e-17	1.40139e-16
ENSG00000058335.11	RASGRF1	131.907	-4.02534	0.232313	-17.3272	2.93316e-67	4.23211e-66
ENSG00000058404.15	CAMK2B	7.19436	-1.27741	0.705279	-1.81121	0.0701086	0.124973
ENSG00000058453.12	CROCC	194.677	-3.84988	0.224178	-17.1733	4.20635e-66	5.98134e-65
ENSG00000058600.11	POLR3E	4043.53	1.07704	0.0723842	14.8795	4.48123e-50	5.02786e-49
ENSG00000058668.10	ATP2B4	9171.15	0.583132	0.0476901	12.2275	2.21587e-34	1.84998e-33
ENSG00000058673.11	ZC3H11A	12755.1	-0.0539366	0.0580695	-0.928828	0.352978	0.457346
ENSG00000058729.6	RIOK2	2445.18	-0.600339	0.0682228	-8.7997	1.37188e-18	7.57482e-18
ENSG00000058799.9	YIPF1	1002.86	0.0419889	0.0762546	0.550641	0.58188	0.673004
ENSG00000058804.10	NDC1	13699.9	0.606652	0.0586307	10.347	4.318e-25	2.8711e-24
ENSG00000058866.10	DGKG	2434.98	0.588678	0.0502436	11.7165	1.04931e-31	8.23692e-31
ENSG00000059122.12	FLYWCH1	485.605	0.792318	0.150868	5.25173	1.50681e-07	5.29668e-07
ENSG00000059145.14	UNKL	602.596	-0.034941	0.11556	-0.302362	0.762376	0.822571
ENSG00000059377.11	TBXAS1	1344.83	-0.991543	0.0563051	-17.6102	2.05723e-69	3.05357e-68
ENSG00000059378.8	PARP12	421.397	-2.58914	0.114354	-22.6414	1.69401e-113	4.42344e-112
ENSG00000059573.4	ALDH18A1	15015.3	-0.268126	0.0432099	-6.2052	5.46268e-10	2.17629e-09
ENSG00000059588.5	TARBP1	8433.36	-0.0192277	0.058579	-0.328235	0.742734	0.806174
ENSG00000059691.7	PET112	2567.22	0.79255	0.0454822	17.4255	5.28369e-68	7.68911e-67
ENSG00000059728.6	MXD1	1774.58	0.808581	0.060857	13.2866	2.77011e-40	2.587e-39
ENSG00000059758.3	CDK17	2009.64	-0.0474201	0.074471	-0.63676	0.524281	0.622062
ENSG00000059769.15	DNAJC25	566.695	0.55521	0.0900071	6.16852	6.89337e-10	2.7334e-09
ENSG00000059804.11	SLC2A3	1846.91	-4.45291	0.0827937	-53.7832	0	0
ENSG00000059915.12	PSD	31.9558	-1.59969	0.319823	-5.00179	5.68012e-07	1.93289e-06
ENSG00000060069.12	CTDP1	3521.77	1.54695	0.107365	14.4084	4.58354e-47	4.89226e-46
ENSG00000060138.8	YBX3	14923.4	-0.118933	0.055084	-2.15913	0.0308403	0.061505
ENSG00000060140.4	STYK1	138.933	-4.07306	0.219553	-18.5516	7.91741e-77	1.29366e-75
ENSG00000060237.12	WNK1	7384.25	0.334894	0.0627927	5.33332	9.64333e-08	3.43095e-07
ENSG00000060303.5	RPS17P5	3.3901	-0.230206	0.792383	-0.290524	0.771415	0.830355
ENSG00000060339.9	CCAR1	8572.07	-0.225314	0.0564585	-3.9908	6.58522e-05	0.000193195
ENSG00000060491.12	OGFR	2124.5	-0.606983	0.127518	-4.75997	1.93625e-06	6.37252e-06
ENSG00000060558.3	GNA15	5827.78	0.0492059	0.106569	0.461728	0.644276	0.729527
ENSG00000060566.9	CREB3L3	0.260936	1.45382	1.31815	1.10293	0.270057	NA
ENSG00000060642.6	PIGV	1151.2	0.301269	0.0612264	4.92058	8.62888e-07	2.90518e-06
ENSG00000060656.15	PTPRU	23.3892	2.31345	0.402134	5.75294	8.77052e-09	3.29915e-08
ENSG00000060688.8	SNRNP40	7056.98	0.0880088	0.0518021	1.69894	0.0893299	0.152527
ENSG00000060709.9	RIMBP2	0.380642	1.72831	1.34335	1.28657	0.198246	NA
ENSG00000060718.14	COL11A1	3.40071	2.32628	0.898249	2.5898	0.0096032	0.0215874
ENSG00000060749.10	QSER1	4495.81	0.615826	0.0965941	6.3754	1.82483e-10	7.44221e-10
ENSG00000060762.14	MPC1	1901.38	2.96052	0.075631	39.1442	0	0
ENSG00000060971.13	ACAA1	1930.97	-0.0747295	0.0578259	-1.29232	0.196247	0.28178
ENSG00000060982.10	BCAT1	27598.9	0.983014	0.0747496	13.1508	1.68464e-39	1.55375e-38
ENSG00000061273.13	HDAC7	1637.51	-3.02702	0.0994895	-30.4256	2.52193e-203	1.51579e-201
ENSG00000061337.11	LZTS1	558.31	-9.71848	0.630879	-15.4047	1.52255e-53	1.80252e-52
ENSG00000061455.10	PRDM6	184.94	-7.18571	0.479888	-14.9737	1.09041e-50	1.23479e-49
ENSG00000061492.7	WNT8A	0	NA	NA	NA	NA	NA
ENSG00000061656.5	SPAG4	58.4506	-0.770336	0.216416	-3.55951	0.00037155	0.001013
ENSG00000061676.10	NCKAP1	1056	-7.32373	0.220084	-33.277	8.29518e-243	6.68728e-241
ENSG00000061794.8	MRPS35	7311.59	0.40259	0.0613986	6.55699	5.49039e-11	2.29599e-10
ENSG00000061918.8	GUCY1B3	93.1731	-6.56877	0.532435	-12.3372	5.70838e-35	4.8186e-34
ENSG00000061936.5	SFSWAP	3603.3	-0.151071	0.0508443	-2.97125	0.00296589	0.00726348
ENSG00000061938.12	TNK2	3645.06	-1.39824	0.148813	-9.39595	5.67056e-21	3.37498e-20
ENSG00000061987.10	MON2	3075.29	0.196256	0.0622121	3.15463	0.00160703	0.00408877
ENSG00000062038.9	CDH3	2.72597	2.40011	0.901565	2.66216	0.00776401	0.0177943
ENSG00000062096.10	ARSF	0.135089	0.899545	1.21864	0.738155	0.46042	NA
ENSG00000062194.11	GPBP1	6642.71	-1.12205	0.0562805	-19.9368	1.95079e-88	3.71772e-87
ENSG00000062282.10	DGAT2	289.766	0.79945	0.105684	7.56453	3.89267e-14	1.84395e-13
ENSG00000062370.12	ZNF112	1.072	3.22603	1.30814	2.46612	0.0136584	0.0297656
ENSG00000062485.14	CS	12019.9	0.291039	0.0422069	6.89553	5.36645e-12	2.34219e-11
ENSG00000062524.11	LTK	13.4555	-4.26315	0.697605	-6.11112	9.89322e-10	3.89655e-09
ENSG00000062582.9	MRPS24	37.8963	0.365989	0.236391	1.54824	0.121565	0.195641
ENSG00000062598.13	ELMO2	1930.49	-0.65575	0.048813	-13.4339	3.8258e-41	3.62737e-40
ENSG00000062650.13	WAPAL	10953.3	0.320945	0.0576547	5.56668	2.59639e-08	9.53137e-08
ENSG00000062716.6	VMP1	3984.34	-0.715644	0.0563571	-12.6984	6.03724e-37	5.2957e-36
ENSG00000062725.5	APPBP2	3840.07	-0.793278	0.059704	-13.2868	2.75957e-40	2.57794e-39
ENSG00000062822.8	POLD1	5326.08	0.272319	0.169026	1.61111	0.107156	0.1771
ENSG00000063015.15	SEZ6	1.17275	3.22973	1.31362	2.45865	0.0139462	0.030332
ENSG00000063046.13	EIF4B	88542.1	1.25318	0.0517844	24.1999	2.22898e-129	6.8958e-128
ENSG00000063127.11	SLC6A16	4.80046	-1.11476	0.681076	-1.63676	0.10168	0.169261
ENSG00000063169.6	GLTSCR1	62.0707	-0.25704	0.259957	-0.988779	0.322771	0.424653
ENSG00000063176.11	SPHK2	605.913	-0.671848	0.1749	-3.84133	0.000122368	0.000350431
ENSG00000063177.8	RPL18	42584.9	-0.0401686	0.0917713	-0.437703	0.661602	0.744387
ENSG00000063180.4	CA11	33.8053	-3.5701	0.378069	-9.44298	3.6234e-21	2.16799e-20
ENSG00000063241.3	ISOC2	2390.82	-0.693804	0.144962	-4.78611	1.70042e-06	5.61943e-06
ENSG00000063244.8	U2AF2	11453.7	-0.354141	0.100704	-3.51665	0.000437038	0.00118202
ENSG00000063245.10	EPN1	1784.07	-0.94196	0.160173	-5.88088	4.08084e-09	1.56127e-08
ENSG00000063322.9	MED29	1503.62	0.147167	0.0637522	2.30842	0.0209757	0.0437205
ENSG00000063438.12	AHRR	9582.53	-1.03492	0.0828962	-12.4845	9.0659e-36	7.75808e-35
ENSG00000063515.2	GSC2	0	NA	NA	NA	NA	NA
ENSG00000063587.12	ZNF275	1051.45	-0.119963	0.0686612	-1.74717	0.0806086	0.140037
ENSG00000063601.12	MTMR1	1176.34	1.19552	0.0623373	19.1782	5.62461e-82	9.86184e-81
ENSG00000063660.4	GPC1	1.25079	-0.296629	1.22965	-0.24123	0.809377	0.863681
ENSG00000063761.11	ADCK1	247.326	-0.167421	0.109986	-1.52221	0.127956	0.202989
ENSG00000063854.8	HAGH	457.858	1.55784	0.139189	11.1923	4.448e-29	3.26612e-28
ENSG00000063978.11	RNF4	5163.96	-0.0917092	0.040113	-2.28627	0.0222383	0.0460937
ENSG00000064012.17	CASP8	3172.08	1.31873	0.0596134	22.1214	1.9675e-108	4.81958e-107
ENSG00000064042.13	LIMCH1	3.13786	3.67794	1.0457	3.51719	0.000436145	0.00117982
ENSG00000064102.10	ASUN	9542.6	0.402693	0.0617423	6.52217	6.92976e-11	2.88524e-10
ENSG00000064115.6	TM7SF3	24299	-1.73057	0.0534224	-32.394	3.33287e-230	2.43555e-228
ENSG00000064195.7	DLX3	0.2491	0.0306646	1.31771	0.023271	0.981434	NA
ENSG00000064199.2	SPA17	296.205	0.0125049	0.112997	0.110666	0.911881	0.940396
ENSG00000064201.11	TSPAN32	1557.45	10.3893	0.539106	19.2713	9.34662e-83	1.65979e-81
ENSG00000064205.6	WISP2	0.390742	0.611597	1.35942	0.449894	0.652787	0.736946
ENSG00000064218.4	DMRT3	0	NA	NA	NA	NA	NA
ENSG00000064225.8	ST3GAL6	1263.24	1.31059	0.0692551	18.9241	7.22726e-80	1.21947e-78
ENSG00000064270.8	ATP2C2	1.00443	0.150094	1.1384	0.131847	0.895105	0.929132
ENSG00000064300.4	NGFR	0.335567	-1.637	1.34226	-1.21959	0.222622	NA
ENSG00000064309.10	CDON	60.0392	1.30582	0.217873	5.99347	2.05412e-09	7.97695e-09
ENSG00000064313.7	TAF2	5467.49	-1.53785	0.0498647	-30.8404	7.53266e-209	4.7231e-207
ENSG00000064393.11	HIPK2	1913.03	-1.83144	0.0605304	-30.2565	4.2869e-201	2.50258e-199
ENSG00000064419.9	TNPO3	9148.45	0.0492643	0.0459495	1.07214	0.283658	0.382863
ENSG00000064489.17	MEF2BNB-MEF2B	0.602865	-1.1084	1.31308	-0.84412	0.398602	0.5038
ENSG00000064490.9	RFXANK	2717.56	-0.329126	0.105595	-3.11688	0.00182777	0.00460996
ENSG00000064545.10	TMEM161A	1125.21	-0.346692	0.165854	-2.09035	0.0365867	0.0715602
ENSG00000064547.9	LPAR2	354.273	0.724324	0.111087	6.52033	7.01517e-11	2.9192e-10
ENSG00000064601.12	CTSA	6624.85	0.529406	0.0672461	7.87267	3.4716e-15	1.70905e-14
ENSG00000064607.12	SUGP2	9730.65	-0.0280976	0.0407204	-0.690013	0.490186	0.590425
ENSG00000064651.9	SLC12A2	2004.31	-1.45072	0.0581093	-24.9654	1.45484e-137	4.84517e-136
ENSG00000064652.6	SNX24	76.5845	-5.65495	0.450505	-12.5525	3.85344e-36	3.31899e-35
ENSG00000064655.14	EYA2	0.125848	0.87702	1.21671	0.720811	0.471026	NA
ENSG00000064666.10	CNN2	7155.41	0.625413	0.0981393	6.37271	1.85719e-10	7.57214e-10
ENSG00000064687.8	ABCA7	174.981	-1.56707	0.139955	-11.1969	4.22122e-29	3.10184e-28
ENSG00000064692.14	SNCAIP	2.11917	-2.31197	1.0222	-2.26176	0.0237122	0.0488759
ENSG00000064703.7	DDX20	3752.11	0.0876656	0.0520377	1.68466	0.092055	0.155542
ENSG00000064726.5	BTBD1	7605.62	0.227157	0.0668983	3.39556	0.000684871	0.00181779
ENSG00000064763.6	FAR2	2434.16	0.938674	0.0611175	15.3585	3.10646e-53	3.65071e-52
ENSG00000064787.8	BCAS1	2.35753	2.60099	1.01504	2.56246	0.0103934	0.0232011
ENSG00000064835.6	POU1F1	0	NA	NA	NA	NA	NA
ENSG00000064886.9	CHI3L2	4.92509	0.666867	0.632112	1.05498	0.291433	0.391675
ENSG00000064932.11	SBNO2	1445.89	0.0974981	0.174751	0.557924	0.576896	0.668432
ENSG00000064933.12	PMS1	3063.5	0.297042	0.0632315	4.69768	2.63128e-06	8.56723e-06
ENSG00000064961.14	HMG20B	1523.59	-0.175184	0.130987	-1.33741	0.18109	0.264657
ENSG00000064989.8	CALCRL	9.50725	-1.43436	0.577824	-2.48235	0.013052	0.0286078
ENSG00000064995.12	TAF11	3206.83	0.042118	0.0542009	0.777072	0.437116	0.541201
ENSG00000064999.12	ANKS1A	2267.44	0.192094	0.0725986	2.64597	0.00814565	0.0186144
ENSG00000065000.11	AP3D1	5697.45	0.416176	0.0921097	4.51827	6.2348e-06	1.97827e-05
ENSG00000065029.10	ZNF76	1126.39	-0.771403	0.0951412	-8.10798	5.14685e-16	2.61313e-15
ENSG00000065054.9	SLC9A3R2	112.857	-6.35014	0.460226	-13.7979	2.62531e-43	2.60251e-42
ENSG00000065057.3	NTHL1	669.808	0.57993	0.204063	2.84191	0.00448436	0.0107094
ENSG00000065060.12	UHRF1BP1	4356.49	0.196109	0.0426267	4.60063	4.21219e-06	1.35256e-05
ENSG00000065135.7	GNAI3	7189.54	0.39621	0.0645495	6.13808	8.35251e-10	3.29996e-09
ENSG00000065150.14	IPO5	30494.6	0.74222	0.0583386	12.7226	4.42708e-37	3.90016e-36
ENSG00000065154.7	OAT	2057.71	-2.44359	0.0601844	-40.6018	0	0
ENSG00000065183.11	WDR3	11851	0.319437	0.0562588	5.67799	1.36288e-08	5.07095e-08
ENSG00000065243.14	PKN2	3204.09	0.25048	0.0674302	3.71466	0.000203481	0.000570859
ENSG00000065268.6	WDR18	1459.59	0.801155	0.140501	5.70212	1.1833e-08	4.42058e-08
ENSG00000065308.4	TRAM2	1296.38	-0.834948	0.0835832	-9.98942	1.69564e-23	1.08076e-22
ENSG00000065320.4	NTN1	297.799	-7.72614	0.449561	-17.186	3.38339e-66	4.82236e-65
ENSG00000065325.8	GLP2R	0.643501	1.23666	1.33994	0.922924	0.356047	0.460667
ENSG00000065328.12	MCM10	3727.74	-0.703069	0.060304	-11.6587	2.07093e-31	1.61441e-30
ENSG00000065357.15	DGKA	544.539	-0.5719	0.0896013	-6.38272	1.73972e-10	7.10556e-10
ENSG00000065361.10	ERBB3	2.94404	1.5079	0.811422	1.85835	0.0631197	0.113975
ENSG00000065371.13	ROPN1	1.14099	2.09661	1.25322	1.67299	0.0943301	0.158463
ENSG00000065413.12	ANKRD44	1119.62	3.40109	0.084989	40.018	0	0
ENSG00000065427.10	KARS	20258.2	0.0398833	0.0559514	0.712821	0.475957	0.577368
ENSG00000065457.6	ADAT1	1361.91	0.960404	0.055505	17.303	4.46475e-67	6.42068e-66
ENSG00000065485.13	PDIA5	2471.25	0.372944	0.0544743	6.84623	7.58192e-12	3.28701e-11
ENSG00000065491.8	TBC1D22B	1400.04	-0.431708	0.0538283	-8.0201	1.05657e-15	5.30165e-15
ENSG00000065518.7	NDUFB4	5456.95	-0.24876	0.0453755	-5.48225	4.19948e-08	1.52292e-07
ENSG00000065526.6	SPEN	6339.92	0.525284	0.0662837	7.92478	2.28544e-15	1.13316e-14
ENSG00000065534.14	MYLK	28.0464	-2.50915	0.350966	-7.14926	8.72484e-13	3.92489e-12
ENSG00000065548.13	ZC3H15	10505.2	0.086297	0.0607317	1.42095	0.15533	0.236586
ENSG00000065559.10	MAP2K4	1142.01	-0.232577	0.0658164	-3.53373	0.000409744	0.00111166
ENSG00000065600.8	TMEM206	2269.48	-0.82246	0.0594259	-13.8401	1.46021e-43	1.45796e-42
ENSG00000065609.10	SNAP91	2.20813	2.55042	1.0005	2.54914	0.0107988	0.0240357
ENSG00000065613.9	SLK	8219.63	0.532369	0.070833	7.51583	5.65509e-14	2.6639e-13
ENSG00000065615.9	CYB5R4	2743.65	-0.0904569	0.0678288	-1.33361	0.182333	0.266197
ENSG00000065618.12	COL17A1	14.6814	5.77071	0.907668	6.35773	2.04759e-10	8.33285e-10
ENSG00000065621.10	GSTO2	25.6844	0.607881	0.290518	2.0924	0.0364028	0.0712187
ENSG00000065665.16	SEC61A2	122.455	-1.87528	0.157211	-11.9284	8.41345e-33	6.77724e-32
ENSG00000065675.10	PRKCQ	637.838	-2.13901	0.0847372	-25.2428	1.35721e-140	4.66797e-139
ENSG00000065717.10	TLE2	1.30657	1.07793	1.19554	0.901622	0.367258	0.472018
ENSG00000065802.7	ASB1	1386.21	1.33953	0.0607068	22.0656	6.77315e-108	1.64855e-106
ENSG00000065809.9	FAM107B	6574.87	0.225168	0.0631818	3.56381	0.000365517	0.000997439
ENSG00000065833.7	ME1	708.284	-1.36399	0.0827686	-16.4795	5.1495e-61	6.8108e-60
ENSG00000065882.11	TBC1D1	9433.3	0.251897	0.0396579	6.35175	2.12872e-10	8.65607e-10
ENSG00000065883.10	CDK13	5108.64	0.346929	0.049382	7.02541	2.13432e-12	9.46577e-12
ENSG00000065911.7	MTHFD2	19463.5	0.0303821	0.0543432	0.559078	0.576109	0.667723
ENSG00000065923.5	SLC9A7	1037.31	-3.1716	0.0779832	-40.6703	0	0
ENSG00000065970.4	FOXJ2	627.908	-0.735651	0.0911005	-8.07516	6.73863e-16	3.40541e-15
ENSG00000065978.13	YBX1	85695.3	0.152086	0.0390015	3.8995	9.6392e-05	0.000278449
ENSG00000065989.11	PDE4A	199.94	-6.70483	0.387733	-17.2924	5.36714e-67	7.71112e-66
ENSG00000066027.7	PPP2R5A	3657.57	0.10219	0.0595778	1.71523	0.0863024	0.148582
ENSG00000066032.14	CTNNA2	2.1099	4.11013	1.23482	3.32853	0.000873041	0.0022909
ENSG00000066044.9	ELAVL1	7266.49	0.087188	0.0415791	2.09692	0.0360005	0.0705132
ENSG00000066056.9	TIE1	35.5509	-4.5378	0.480537	-9.44319	3.61604e-21	2.16401e-20
ENSG00000066084.8	DIP2B	7207.03	0.0170588	0.0520316	0.327855	0.743021	0.806381
ENSG00000066117.10	SMARCD1	3655.51	-0.841789	0.0496574	-16.9519	1.86192e-64	2.59198e-63
ENSG00000066135.8	KDM4A	5159	0.000351597	0.0490676	0.00716558	0.994283	0.995328
ENSG00000066136.15	NFYC	2319.92	0.0353579	0.0557498	0.634225	0.525934	0.623592
ENSG00000066185.8	ZMYND12	68.1929	0.835202	0.183907	4.54144	5.58721e-06	1.77853e-05
ENSG00000066230.6	SLC9A3	0.972406	0.154777	1.20624	0.128313	0.897901	0.931274
ENSG00000066248.10	NGEF	0.383742	1.79844	1.34909	1.33307	0.182508	NA
ENSG00000066279.12	ASPM	14347.5	0.445849	0.0639003	6.97725	3.01008e-12	1.32495e-11
ENSG00000066294.10	CD84	2695.15	0.339285	0.0652771	5.19761	2.01866e-07	7.03989e-07
ENSG00000066322.8	ELOVL1	4882.63	-0.0484822	0.0495226	-0.978991	0.327584	0.429964
ENSG00000066336.7	SPI1	3427.09	-0.129174	0.147374	-0.876504	0.380756	0.485939
ENSG00000066379.10	ZNRD1	2637.08	-0.236651	0.053409	-4.43092	9.38338e-06	2.94389e-05
ENSG00000066382.12	MPPED2	1.20452	3.39586	1.2937	2.62492	0.00866696	0.0196875
ENSG00000066405.8	CLDN18	0.647857	1.42861	1.28713	1.10991	0.267036	0.364527
ENSG00000066422.4	ZBTB11	5127.41	0.526153	0.0667324	7.88453	3.15728e-15	1.55708e-14
ENSG00000066427.17	ATXN3	3213.11	0.804872	0.0690013	11.6646	1.93323e-31	1.50823e-30
ENSG00000066455.8	GOLGA5	2708.98	0.207113	0.0675115	3.06782	0.00215624	0.00538449
ENSG00000066468.16	FGFR2	0.811065	2.75938	1.34259	2.05527	0.0398527	0.0770628
ENSG00000066557.5	LRRC40	2842.35	0.342582	0.0832141	4.11687	3.8405e-05	0.000115041
ENSG00000066583.7	ISOC1	1461.89	-1.49287	0.061338	-24.3385	7.67903e-131	2.40744e-129
ENSG00000066629.12	EML1	1.42492	3.5554	1.2852	2.76641	0.00566765	0.0133059
ENSG00000066651.13	TRMT11	2570.52	0.208815	0.0594981	3.50961	0.000448761	0.0012119
ENSG00000066654.8	THUMPD1	5709.41	1.73355	0.0576014	30.0956	5.53001e-199	3.15573e-197
ENSG00000066697.10	MSANTD3	747.83	-0.534917	0.0811281	-6.59349	4.29611e-11	1.80374e-10
ENSG00000066735.10	KIF26A	0.135089	0.899545	1.21864	0.738155	0.46042	NA
ENSG00000066739.7	ATG2B	2889.87	1.04928	0.0663299	15.8191	2.2966e-56	2.83452e-55
ENSG00000066777.4	ARFGEF1	7837.68	-1.29408	0.062493	-20.7076	2.96039e-95	6.27344e-94
ENSG00000066813.10	ACSM2B	2.2095	2.52003	1.02881	2.44945	0.0143073	0.0310151
ENSG00000066827.11	ZFAT	1098.24	-0.828455	0.0713685	-11.6081	3.74696e-31	2.90315e-30
ENSG00000066855.11	MTFR1	1491.58	-0.857901	0.07166	-11.9718	4.99133e-33	4.04954e-32
ENSG00000066923.13	STAG3	34.5589	3.39066	0.350937	9.66173	4.38403e-22	2.69181e-21
ENSG00000066926.6	FECH	2382.74	1.11908	0.0504166	22.1967	3.69427e-109	9.10804e-108
ENSG00000066933.11	MYO9A	4282.63	0.466887	0.0725011	6.43973	1.19685e-10	4.92394e-10
ENSG00000067048.12	DDX3Y	0.905673	2.94181	1.33077	2.21061	0.0270625	0.0551278
ENSG00000067057.12	PFKP	7115.51	-0.763716	0.0973518	-7.84491	4.33267e-15	2.12608e-14
ENSG00000067064.6	IDI1	7054.42	-1.70541	0.0782021	-21.8077	1.96091e-105	4.64295e-104
ENSG00000067066.12	SP100	2368.1	0.890358	0.0627954	14.1787	1.24091e-45	1.28446e-44
ENSG00000067082.10	KLF6	1807.1	-1.92779	0.0561316	-34.3441	1.72633e-258	1.54271e-256
ENSG00000067113.12	PPAP2A	656.306	-2.45806	0.0917073	-26.8033	2.95582e-158	1.19937e-156
ENSG00000067141.12	NEO1	19.0584	2.84473	0.461896	6.15881	7.32951e-10	2.90369e-09
ENSG00000067167.3	TRAM1	8055.87	0.0493521	0.087915	0.561361	0.574551	0.666298
ENSG00000067177.10	PHKA1	1.92218	1.82916	0.994165	1.8399	0.0657836	0.118204
ENSG00000067182.3	TNFRSF1A	8462.79	-0.872264	0.0626171	-13.9301	4.1565e-44	4.18438e-43
ENSG00000067191.11	CACNB1	58.0684	-4.71529	0.393065	-11.9962	3.71942e-33	3.02972e-32
ENSG00000067208.10	EVI5	1219.67	-0.651366	0.0730951	-8.91122	5.04724e-19	2.8247e-18
ENSG00000067221.9	STOML1	215.075	0.64936	0.177314	3.6622	0.00025006	0.0006952
ENSG00000067225.13	PKM	80951.7	0.166372	0.0553845	3.00394	0.00266511	0.00656804
ENSG00000067248.5	DHX29	2478.34	-1.21228	0.0535028	-22.6582	1.15696e-113	3.02888e-112
ENSG00000067334.9	DNTTIP2	7054.68	0.0728855	0.0655064	1.11265	0.265861	0.36312
ENSG00000067365.10	METTL22	592.403	0.784819	0.0813398	9.64865	4.98064e-22	3.05259e-21
ENSG00000067369.9	TP53BP1	5850.25	-0.129728	0.0499026	-2.59963	0.00933256	0.0210451
ENSG00000067445.16	TRO	1.19346	-0.821735	1.10484	-0.743758	0.457023	0.559739
ENSG00000067533.5	RRP15	2722.33	0.719867	0.0680821	10.5735	3.95407e-26	2.68776e-25
ENSG00000067560.6	RHOA	32365.1	-0.278956	0.0449938	-6.19988	5.65051e-10	2.24906e-09
ENSG00000067596.6	DHX8	5678.45	0.661386	0.0537545	12.3038	8.6397e-35	7.25883e-34
ENSG00000067601.6	PMS2P4	129.768	-0.403777	0.140155	-2.88093	0.003965	0.00953935
ENSG00000067606.11	PRKCZ	21.1664	1.65552	0.365099	4.53444	5.77577e-06	1.83721e-05
ENSG00000067646.7	ZFY	0.110069	-0.76268	1.21978	-0.62526	0.531801	NA
ENSG00000067704.8	IARS2	10945.2	-0.0708284	0.0596373	-1.18765	0.23497	0.327715
ENSG00000067715.9	SYT1	0.405799	1.77381	1.34644	1.31741	0.187701	0.272191
ENSG00000067798.9	NAV3	4.07096	4.03428	1.01735	3.96547	7.32527e-05	0.000213815
ENSG00000067829.14	IDH3G	2637.37	-0.227782	0.101991	-2.23335	0.025526	0.0522927
ENSG00000067836.8	ROGDI	833.587	0.795055	0.121007	6.57032	5.02056e-11	2.10298e-10
ENSG00000067840.8	PDZD4	0.379703	0.621987	1.35724	0.458273	0.646756	NA
ENSG00000067842.13	ATP2B3	1.26434	2.26864	1.23432	1.83797	0.0660667	0.11865
ENSG00000067900.6	ROCK1	12455.5	1.4856	0.0575846	25.7985	9.2061e-147	3.37184e-145
ENSG00000067955.9	CBFB	8181.66	-0.154559	0.0731309	-2.11346	0.0345613	0.0679563
ENSG00000067992.8	PDK3	551.406	-0.169136	0.0879626	-1.92282	0.0545033	0.100812
ENSG00000068001.9	HYAL2	1197.53	-1.87909	0.110031	-17.0778	2.16993e-65	3.06131e-64
ENSG00000068024.12	HDAC4	1670.81	1.47999	0.0758934	19.5009	1.07965e-84	1.96654e-83
ENSG00000068028.13	RASSF1	3339.78	-0.239694	0.072014	-3.32843	0.000873356	0.00229153
ENSG00000068078.13	FGFR3	53.2885	3.33254	0.304511	10.9439	7.10797e-28	5.05251e-27
ENSG00000068079.3	IFI35	289.674	1.07783	0.132957	8.10657	5.20693e-16	2.64231e-15
ENSG00000068097.10	HEATR6	2397.97	0.0773024	0.0554196	1.39486	0.163059	0.246503
ENSG00000068120.10	COASY	5946.28	-0.398696	0.0829917	-4.80405	1.55489e-06	5.15303e-06
ENSG00000068137.10	PLEKHH3	20.5637	-3.57588	0.491685	-7.27272	3.52323e-13	1.60868e-12
ENSG00000068305.13	MEF2A	2329.71	-0.19823	0.0656508	-3.01946	0.00253223	0.00626128
ENSG00000068308.9	OTUD5	1639.07	0.204706	0.0631578	3.24119	0.00119032	0.0030776
ENSG00000068323.12	TFE3	788.379	-1.07127	0.0813738	-13.1648	1.39855e-39	1.29185e-38
ENSG00000068354.11	TBC1D25	599.056	-0.613993	0.0874052	-7.02468	2.14561e-12	9.51169e-12
ENSG00000068366.15	ACSL4	6969.53	0.395952	0.0676019	5.85711	4.70991e-09	1.79653e-08
ENSG00000068383.14	INPP5A	1407.03	0.0324807	0.0569139	0.570699	0.568203	0.660898
ENSG00000068394.9	GPKOW	1100.12	0.0559798	0.0860038	0.650899	0.515112	0.613236
ENSG00000068400.9	GRIPAP1	2058.74	0.236717	0.0652038	3.63042	0.000282956	0.000781947
ENSG00000068438.10	FTSJ1	3547.78	-0.364087	0.0670233	-5.43224	5.5651e-08	2.00503e-07
ENSG00000068489.8	PRR11	5969.1	-0.854268	0.0567522	-15.0526	3.31919e-51	3.78115e-50
ENSG00000068615.12	REEP1	7.39143	2.13734	0.612746	3.48814	0.000486397	0.00130925
ENSG00000068650.14	ATP11A	3499.85	0.936571	0.0490989	19.0752	4.06072e-81	7.02283e-80
ENSG00000068654.11	POLR1A	12399.7	0.200559	0.0427725	4.68898	2.7457e-06	8.92571e-06
ENSG00000068697.6	LAPTM4A	2441.01	-1.20454	0.050707	-23.7548	9.7956e-125	2.88407e-123
ENSG00000068724.11	TTC7A	4668.73	-0.577266	0.0890524	-6.48232	9.03238e-11	3.73704e-10
ENSG00000068745.10	IP6K2	3077.52	-0.752241	0.0544259	-13.8214	1.89414e-43	1.88444e-42
ENSG00000068781.16	STON1-GTF2A1L	4.89107	-4.99249	1.16423	-4.28822	1.80113e-05	5.54067e-05
ENSG00000068784.8	SRBD1	3131.29	0.975225	0.0588482	16.5719	1.11317e-61	1.49106e-60
ENSG00000068793.13	CYFIP1	5070.61	-1.4366	0.0484945	-29.6239	7.35657e-193	4.01032e-191
ENSG00000068796.12	KIF2A	4591.85	-1.23295	0.0612342	-20.1349	3.64819e-90	7.14928e-89
ENSG00000068831.14	RASGRP2	5544.53	1.55853	0.116167	13.4163	4.85349e-41	4.59033e-40
ENSG00000068878.10	PSME4	5455.25	-0.296596	0.0960482	-3.08799	0.00201513	0.00505492
ENSG00000068885.10	IFT80	900.93	-0.179035	0.0808714	-2.21382	0.0268412	0.0547186
ENSG00000068903.15	SIRT2	858.439	0.35021	0.0981912	3.56661	0.000361631	0.00098701
ENSG00000068912.9	ERLEC1	3794.98	-0.124378	0.0522024	-2.38262	0.0171898	0.036644
ENSG00000068971.9	PPP2R5B	169.317	-2.16469	0.138052	-15.6803	2.06325e-55	2.50892e-54
ENSG00000068976.9	PYGM	51.3849	-0.135074	0.223035	-0.605618	0.544769	0.640372
ENSG00000068985.4	PAGE1	0.128947	0.881431	1.21709	0.72421	0.468937	NA
ENSG00000069011.11	PITX1	916.97	-0.932533	0.163351	-5.70875	1.13806e-08	4.25629e-08
ENSG00000069018.13	TRPC7	0.138426	0.907324	1.21929	0.744142	0.45679	NA
ENSG00000069020.14	MAST4	703.629	-7.64161	0.286161	-26.7039	4.24596e-157	1.70696e-155
ENSG00000069122.14	GPR116	0.678781	2.397	1.3579	1.76522	0.0775268	0.135658
ENSG00000069188.12	SDK2	828.919	9.96698	0.541995	18.3894	1.59619e-75	2.55734e-74
ENSG00000069206.11	ADAM7	0.660061	2.51668	1.3531	1.85994	0.0628941	0.113615
ENSG00000069248.9	NUP133	8629.22	0.647108	0.0614089	10.5377	5.79043e-26	3.92377e-25
ENSG00000069275.12	NUCKS1	32304.3	-0.151258	0.0680531	-2.22264	0.0262399	0.0536039
ENSG00000069329.11	VPS35	14216.5	0.0697716	0.0570602	1.22277	0.221416	0.311578
ENSG00000069345.7	DNAJA2	7239.52	-0.102253	0.0579169	-1.76552	0.0774766	0.135624
ENSG00000069399.8	BCL3	87.3116	-1.02254	0.175996	-5.81003	6.24608e-09	2.36443e-08
ENSG00000069424.10	KCNAB2	14933.3	0.682125	0.0953687	7.1525	8.52093e-13	3.83543e-12
ENSG00000069431.6	ABCC9	2.65794	4.33209	1.22207	3.54486	0.000392814	0.00106848
ENSG00000069482.6	GAL	1264.84	-1.52188	0.0696929	-21.837	1.03327e-105	2.45608e-104
ENSG00000069493.10	CLEC2D	142.209	3.91292	0.204254	19.1571	8.44346e-82	1.47111e-80
ENSG00000069509.5	FUNDC1	570.777	-0.113343	0.0824969	-1.3739	0.169471	0.252583
ENSG00000069535.12	MAOB	7.04999	-4.06484	0.873153	-4.65536	3.23422e-06	1.04613e-05
ENSG00000069667.11	RORA	2.47716	2.73342	0.982473	2.78218	0.00539952	0.0127228
ENSG00000069696.6	DRD4	3.40265	2.73606	0.882487	3.1004	0.00193259	0.00485706
ENSG00000069702.6	TGFBR3	166.498	-0.191081	0.135025	-1.41515	0.157024	0.238867
ENSG00000069712.9	KIAA1107	197.669	0.0912283	0.121522	0.750712	0.452826	0.556198
ENSG00000069764.5	PLA2G10	0	NA	NA	NA	NA	NA
ENSG00000069812.7	HES2	0.654899	1.34143	1.30488	1.02801	0.303946	0.404266
ENSG00000069849.6	ATP1B3	9080.3	0.112326	0.0559382	2.00804	0.0446389	0.0849804
ENSG00000069869.11	NEDD4	2982.4	-2.36983	0.0686565	-34.5172	4.42501e-261	4.01319e-259
ENSG00000069943.5	PIGB	1760.1	0.0975003	0.0620924	1.57025	0.116358	0.18928
ENSG00000069956.7	MAPK6	7047.63	-0.122467	0.0588427	-2.08127	0.0374094	0.0729491
ENSG00000069966.14	GNB5	1007.65	0.241439	0.0677488	3.56373	0.000365618	0.000997625
ENSG00000069974.11	RAB27A	2401.1	1.27321	0.0799617	15.9228	4.40546e-57	5.4795e-56
ENSG00000069998.8	CECR5	2624.91	-0.365352	0.0896485	-4.07538	4.59384e-05	0.000136534
ENSG00000070010.14	UFD1L	3307.64	-0.225776	0.053274	-4.23802	2.25496e-05	6.88047e-05
ENSG00000070018.4	LRP6	2931.11	-3.01526	0.0674846	-44.6807	0	0
ENSG00000070019.3	GUCY2C	1.02532	3.02473	1.32896	2.27602	0.0228448	0.0472445
ENSG00000070031.3	SCT	0.110069	-0.76268	1.21978	-0.62526	0.531801	NA
ENSG00000070047.7	PHRF1	2629.97	0.331902	0.129473	2.56348	0.0103629	0.0231364
ENSG00000070061.10	IKBKAP	6048.3	0.700606	0.0519604	13.4835	1.95699e-41	1.86828e-40
ENSG00000070081.11	NUCB2	29299.2	2.78412	0.0626975	44.4055	0	0
ENSG00000070087.9	PFN2	193.004	-4.0907	0.202025	-20.2485	3.66349e-91	7.2918e-90
ENSG00000070159.9	PTPN3	24.8667	6.4916	0.870898	7.45392	9.06066e-14	4.2354e-13
ENSG00000070182.13	SPTB	40.523	-4.49464	0.443665	-10.1307	4.03702e-24	2.62247e-23
ENSG00000070190.8	DAPP1	628.829	0.687443	0.0909194	7.56102	3.99924e-14	1.89414e-13
ENSG00000070193.4	FGF10	3.47765	-2.1751	0.859715	-2.53003	0.0114053	0.0252655
ENSG00000070214.11	SLC44A1	5134.11	0.256054	0.0632406	4.04889	5.14618e-05	0.000152267
ENSG00000070269.9	TMEM260	1520.47	0.91618	0.0586175	15.6298	4.56285e-55	5.52638e-54
ENSG00000070366.9	SMG6	982.01	-0.424873	0.0678576	-6.26125	3.81911e-10	1.53596e-09
ENSG00000070367.11	EXOC5	8041.15	0.120786	0.0801912	1.50623	0.132008	0.208407
ENSG00000070371.11	CLTCL1	5045.09	5.8002	0.0715474	81.0678	0	0
ENSG00000070388.7	FGF22	0	NA	NA	NA	NA	NA
ENSG00000070404.5	FSTL3	133.183	1.25229	0.159487	7.85199	4.09495e-15	2.0117e-14
ENSG00000070413.14	DGCR2	4334.26	-0.745062	0.114491	-6.50761	7.63575e-11	3.17095e-10
ENSG00000070423.13	RNF126	1282.29	0.40456	0.15768	2.56569	0.010297	0.0230011
ENSG00000070444.10	MNT	551.952	0.335501	0.107223	3.129	0.00175401	0.00443421
ENSG00000070476.10	ZXDC	2282.76	0.927224	0.0600444	15.4423	8.50015e-54	1.00984e-52
ENSG00000070495.10	JMJD6	1544.31	-1.29614	0.0704771	-18.3909	1.55349e-75	2.49024e-74
ENSG00000070501.7	POLB	1005.67	-1.24931	0.0660103	-18.926	6.97106e-80	1.17689e-78
ENSG00000070526.10	ST6GALNAC1	0.763891	0.841079	1.21009	0.695055	0.487021	0.587715
ENSG00000070540.8	WIPI1	105.014	-2.98217	0.206802	-14.4204	3.84901e-47	4.11547e-46
ENSG00000070601.5	FRMPD1	1.44712	2.55148	1.16616	2.18793	0.0286748	0.0579447
ENSG00000070610.10	GBA2	2857.99	0.150255	0.0629641	2.38636	0.0170159	0.0363087
ENSG00000070614.10	NDST1	5063.72	-0.653703	0.0742134	-8.80841	1.26931e-18	7.01989e-18
ENSG00000070669.12	ASNS	2571.73	0.997035	0.0634688	15.7091	1.31104e-55	1.59806e-54
ENSG00000070718.7	AP3M2	1566.31	-1.07007	0.0658249	-16.2564	2.01338e-59	2.59643e-58
ENSG00000070729.9	CNGB1	2.28879	0.736106	0.846759	0.869322	0.384671	0.490105
ENSG00000070731.5	ST6GALNAC2	8.67073	-0.760674	0.531068	-1.43235	0.152045	0.232372
ENSG00000070748.13	CHAT	2.38008	4.24142	1.22559	3.46072	0.000538726	0.00144385
ENSG00000070756.9	PABPC1	48107.5	-0.0581038	0.0537964	-1.08007	0.280112	0.379018
ENSG00000070759.12	TESK2	156.735	0.137313	0.129023	1.06425	0.287215	0.386935
ENSG00000070761.3	C16orf80	2767.03	-0.647432	0.0481374	-13.4497	3.09277e-41	2.93876e-40
ENSG00000070770.4	CSNK2A2	6445.91	0.140702	0.0532028	2.64463	0.00817815	0.0186788
ENSG00000070778.8	PTPN21	6.30364	3.63718	0.82501	4.40865	1.04018e-05	3.25568e-05
ENSG00000070785.12	EIF2B3	2172.24	0.547068	0.0552745	9.8973	4.2768e-23	2.70275e-22
ENSG00000070808.11	CAMK2A	1.17927	2.28805	1.19188	1.9197	0.0548963	0.101477
ENSG00000070814.13	TCOF1	8796.12	0.134553	0.0952226	1.41303	0.157646	0.239718
ENSG00000070831.11	CDC42	22993.5	-0.186602	0.0570835	-3.26893	0.00107955	0.00280285
ENSG00000070882.8	OSBPL3	2036.58	-2.09477	0.0648309	-32.3112	4.86179e-229	3.51908e-227
ENSG00000070886.6	EPHA8	1.52205	0.949712	1.0564	0.899008	0.368648	0.473589
ENSG00000070915.5	SLC12A3	0.919382	1.06433	1.21502	0.875978	0.381042	0.486244
ENSG00000070950.5	RAD18	3352.21	0.0342033	0.0591728	0.578024	0.563248	0.656562
ENSG00000070961.10	ATP2B1	5589.05	-0.569836	0.0630361	-9.03984	1.56907e-19	8.92892e-19
ENSG00000070985.9	TRPM5	0.722687	-0.525854	1.2919	-0.407039	0.683979	0.762889
ENSG00000071051.9	NCK2	1740.88	-0.340726	0.0852085	-3.99874	6.36808e-05	0.000187095
ENSG00000071054.11	MAP4K4	7308.51	-1.84638	0.0430594	-42.8798	0	0
ENSG00000071073.8	MGAT4A	3711.14	1.55816	0.0652533	23.8787	5.10177e-126	1.52567e-124
ENSG00000071082.6	RPL31	66846.3	0.711824	0.0567998	12.5322	4.97938e-36	4.28304e-35
ENSG00000071127.12	WDR1	12345.3	0.413909	0.0477141	8.67477	4.14388e-18	2.25938e-17
ENSG00000071189.17	SNX13	3710.82	0.450438	0.0689381	6.53395	6.40583e-11	2.67038e-10
ENSG00000071203.5	MS4A12	0.273515	1.48593	1.32238	1.12368	0.261149	NA
ENSG00000071205.7	ARHGAP10	1700.52	-0.108594	0.052911	-2.05239	0.0401314	0.077518
ENSG00000071242.7	RPS6KA2	35.5002	5.01279	0.508971	9.84888	6.93093e-23	4.35118e-22
ENSG00000071243.11	ING3	1388.4	0.940172	0.0651831	14.4235	3.6793e-47	3.93816e-46
ENSG00000071246.6	VASH1	827.19	-4.39739	0.13226	-33.248	2.18369e-242	1.75577e-240
ENSG00000071282.7	LMCD1	4.45352	-4.88247	1.17145	-4.16788	3.07444e-05	9.28243e-05
ENSG00000071462.7	WBSCR22	4520.75	-0.725836	0.0512589	-14.1602	1.61574e-45	1.66733e-44
ENSG00000071537.9	SEL1L	8916.23	0.122489	0.056883	2.15334	0.0312918	0.0622546
ENSG00000071539.9	TRIP13	3859.05	-0.0711197	0.0533779	-1.33238	0.182736	0.266742
ENSG00000071553.12	ATP6AP1	5149.02	-0.010422	0.0675419	-0.154304	0.87737	0.916782
ENSG00000071564.10	TCF3	3184.41	0.206606	0.122432	1.68752	0.0915033	0.155031
ENSG00000071575.7	TRIB2	307.383	-2.69432	0.115057	-23.4173	2.84822e-121	8.02903e-120
ENSG00000071626.12	DAZAP1	7826.44	1.02241	0.0784146	13.0385	7.38502e-39	6.75604e-38
ENSG00000071655.13	MBD3	2119.7	-0.242225	0.177966	-1.36108	0.17349	0.256838
ENSG00000071677.1	PRLH	0	NA	NA	NA	NA	NA
ENSG00000071794.11	HLTF	12799.2	-1.47005	0.0618866	-23.7539	1.00154e-124	2.94595e-123
ENSG00000071859.10	FAM50A	1507.63	-2.32246	0.090771	-25.5859	2.18762e-144	7.79689e-143
ENSG00000071889.12	FAM3A	659.819	-0.648784	0.130813	-4.95964	7.06232e-07	2.38937e-06
ENSG00000071894.10	CPSF1	8309.03	-1.61034	0.158981	-10.1291	4.10322e-24	2.66434e-23
ENSG00000071909.14	MYO3B	3.42764	-0.417512	0.697833	-0.598299	0.549641	0.644448
ENSG00000071967.7	CYBRD1	3885.16	0.58173	0.042631	13.6457	2.14182e-42	2.08124e-41
ENSG00000071991.4	CDH19	1.86178	3.94539	1.24883	3.15926	0.00158169	0.00402766
ENSG00000071994.6	PDCD2	6118.96	1.69447	0.0566929	29.8887	2.76353e-196	1.55089e-194
ENSG00000072041.12	SLC6A15	1.58065	2.70352	1.14046	2.37055	0.0177617	0.03776
ENSG00000072042.8	RDH11	2280.31	-1.91624	0.0643903	-29.7598	1.29546e-194	7.16455e-193
ENSG00000072062.9	PRKACA	870.758	0.853393	0.0847249	10.0725	7.30803e-24	4.71118e-23
ENSG00000072071.12	LPHN1	570.185	-7.18404	0.27602	-26.0273	2.43481e-149	9.13745e-148
ENSG00000072080.6	SPP2	0.389884	1.99382	1.35848	1.46768	0.142192	0.219261
ENSG00000072110.9	ACTN1	7992.67	-0.489274	0.0718777	-6.80704	9.96286e-12	4.29965e-11
ENSG00000072121.11	ZFYVE26	1860.03	-0.371434	0.0515849	-7.20043	6.0023e-13	2.7182e-12
ENSG00000072133.6	RPS6KA6	1.74745	0.191921	0.987451	0.19436	0.845894	0.89331
ENSG00000072134.11	EPN2	258.732	-3.27437	0.158906	-20.6057	2.44027e-94	5.10381e-93
ENSG00000072135.8	PTPN18	1989.86	0.260172	0.0579992	4.48579	7.26432e-06	2.29537e-05
ENSG00000072163.14	LIMS2	13.5926	3.11397	0.578204	5.38559	7.22067e-08	2.58744e-07
ENSG00000072182.8	ASIC4	2.24573	3.1931	1.08769	2.93567	0.00332833	0.00809321
ENSG00000072195.10	SPEG	154.941	4.88518	0.281468	17.3561	1.77387e-67	2.56915e-66
ENSG00000072201.9	LNX1	20.002	-0.774677	0.352531	-2.19747	0.0279867	0.0567538
ENSG00000072210.14	ALDH3A2	2446.21	0.394381	0.0522331	7.55039	4.3394e-14	2.0527e-13
ENSG00000072274.8	TFRC	103928	-0.350914	0.0559654	-6.27019	3.60598e-10	1.45274e-09
ENSG00000072310.12	SREBF1	2273.21	-3.36514	0.16382	-20.5417	9.13835e-94	1.89954e-92
ENSG00000072315.3	TRPC5	0.638616	1.32792	1.32139	1.00494	0.314924	0.415909
ENSG00000072364.8	AFF4	3421.96	-1.46196	0.0605108	-24.1603	5.81678e-129	1.79226e-127
ENSG00000072401.10	UBE2D1	1141.7	0.280615	0.13973	2.00827	0.0446151	0.0849404
ENSG00000072415.4	MPP5	756.2	-1.27371	0.0938766	-13.5679	6.2095e-42	5.98236e-41
ENSG00000072422.12	RHOBTB1	947.341	-1.20799	0.0657182	-18.3814	1.85068e-75	2.96196e-74
ENSG00000072444.10	ASAH2C	0.786442	2.7613	1.34174	2.058	0.0395902	0.0766784
ENSG00000072501.13	SMC1A	14810.8	0.525978	0.0427735	12.2968	9.42407e-35	7.91346e-34
ENSG00000072506.8	HSD17B10	4872.61	0.0670161	0.0600679	1.11567	0.264563	0.361623
ENSG00000072518.16	MARK2	2167.81	-0.0831482	0.0904745	-0.919024	0.358083	0.462661
ENSG00000072571.15	HMMR	5613.59	0.641666	0.0732443	8.76062	1.94173e-18	1.06806e-17
ENSG00000072609.13	CHFR	2116.73	-0.182958	0.0753285	-2.4288	0.0151488	0.0326724
ENSG00000072657.4	TRHDE	2.10211	-0.298696	0.903035	-0.33077	0.740819	0.804812
ENSG00000072682.14	P4HA2	76.867	-1.72526	0.202803	-8.50708	1.78361e-17	9.51542e-17
ENSG00000072694.14	FCGR2B	9.00525	-1.31874	0.488428	-2.69996	0.00693479	0.0160276
ENSG00000072736.14	NFATC3	5109.73	0.552563	0.0554314	9.96842	2.09546e-23	1.33309e-22
ENSG00000072756.12	TRNT1	3843.08	-0.18063	0.0715321	-2.52515	0.0115647	0.0256039
ENSG00000072778.15	ACADVL	8453.79	-0.11992	0.056098	-2.13769	0.0325418	0.064398
ENSG00000072786.8	STK10	6428.36	1.08071	0.0786545	13.7399	5.85252e-43	5.76791e-42
ENSG00000072803.13	FBXW11	5647.22	-0.460056	0.0532967	-8.63199	6.02943e-18	3.2728e-17
ENSG00000072818.7	ACAP1	1728.03	3.17343	0.121862	26.0412	1.69317e-149	6.36985e-148
ENSG00000072832.10	CRMP1	6.4789	-1.84964	0.611778	-3.02339	0.00249962	0.00618672
ENSG00000072840.8	EVC	481.168	-7.45135	0.3392	-21.9674	5.90474e-107	1.42579e-105
ENSG00000072849.6	DERL2	1059.5	-0.130584	0.0749166	-1.74305	0.0813246	0.141121
ENSG00000072858.6	SIDT1	141.295	-1.77246	0.143746	-12.3305	6.2064e-35	5.23319e-34
ENSG00000072864.8	NDE1	2253.36	-0.0183408	0.0536859	-0.341631	0.732628	0.798619
ENSG00000072952.14	MRVI1	19.2284	2.94195	0.439719	6.69052	2.22386e-11	9.45682e-11
ENSG00000072954.2	TMEM38A	249.138	-4.38968	0.183173	-23.9647	6.48616e-127	1.96474e-125
ENSG00000072958.4	AP1M1	4939.35	-0.0704946	0.098072	-0.718805	0.472261	0.574029
ENSG00000073008.10	PVR	1536.22	0.413938	0.0635139	6.51729	7.1587e-11	2.9769e-10
ENSG00000073009.8	IKBKG	318.435	-0.357777	0.138386	-2.58537	0.00972758	0.0218331
ENSG00000073050.7	XRCC1	1559.92	-0.351706	0.0820188	-4.28812	1.80192e-05	5.54253e-05
ENSG00000073060.11	SCARB1	5960.42	-0.876177	0.0892853	-9.81322	9.87658e-23	6.17499e-22
ENSG00000073067.9	CYP2W1	0.238682	-1.31269	1.30423	-1.00648	0.314183	NA
ENSG00000073111.9	MCM2	21738.6	0.377099	0.0809666	4.65747	3.20121e-06	1.03568e-05
ENSG00000073146.11	MOV10L1	1.54229	1.8912	1.15213	1.64149	0.100696	0.16788
ENSG00000073150.9	PANX2	3.4084	0.492881	0.79501	0.619968	0.535279	0.631863
ENSG00000073169.9	SELO	1022.93	-0.371296	0.166903	-2.22462	0.0261067	0.0533551
ENSG00000073282.8	TP63	7.30013	-1.20593	0.682753	-1.76628	0.077349	0.135447
ENSG00000073331.13	ALPK1	1076.28	0.999399	0.0696301	14.353	1.02081e-46	1.08124e-45
ENSG00000073350.9	LLGL2	309.099	-2.30122	0.143301	-16.0586	4.97374e-58	6.28118e-57
ENSG00000073417.10	PDE8A	809.114	-0.347462	0.0864429	-4.01955	5.83087e-05	0.000171875
ENSG00000073464.7	CLCN4	57.4107	8.23012	0.973289	8.45599	2.76733e-17	1.46812e-16
ENSG00000073536.13	NLE1	3269.92	1.42728	0.0827296	17.2523	1.0748e-66	1.53983e-65
ENSG00000073578.12	SDHA	9679.89	-1.17405	0.0641104	-18.3129	6.52895e-75	1.03785e-73
ENSG00000073584.14	SMARCE1	4245.38	-0.0690972	0.0651949	-1.05986	0.28921	0.389271
ENSG00000073598.5	FNDC8	0.636058	1.37652	1.29527	1.06273	0.287906	0.387756
ENSG00000073605.14	GSDMB	348.819	0.126688	0.0915236	1.38421	0.166296	0.249838
ENSG00000073614.7	KDM5A	9136.64	0.825378	0.0633585	13.0271	8.57991e-39	7.83505e-38
ENSG00000073670.9	ADAM11	28.0085	-0.168801	0.277407	-0.608496	0.542858	0.638823
ENSG00000073711.6	PPP2R3A	1.50522	1.39497	1.11148	1.25506	0.209457	0.297663
ENSG00000073712.9	FERMT2	1.42655	2.5373	1.16712	2.17399	0.029706	0.0597039
ENSG00000073734.8	ABCB11	1.17373	2.25392	1.18879	1.89598	0.0579627	0.106487
ENSG00000073737.12	DHRS9	10.9863	-2.2162	0.534417	-4.14696	3.36922e-05	0.000101453
ENSG00000073754.5	CD5L	22.2472	1.15572	0.311136	3.71452	0.000203587	0.000571104
ENSG00000073756.7	PTGS2	96.7204	0.495938	0.156391	3.17114	0.00151843	0.00387759
ENSG00000073792.11	IGF2BP2	2867.68	-10.9606	0.503189	-21.7823	3.41436e-105	8.06557e-104
ENSG00000073803.9	MAP3K13	795.342	9.29417	0.434604	21.3854	1.82824e-101	4.15761e-100
ENSG00000073849.10	ST6GAL1	5139.82	-0.131435	0.0435164	-3.02036	0.00252473	0.00624431
ENSG00000073861.2	TBX21	1.31565	-1.52317	1.13228	-1.34522	0.178554	0.26193
ENSG00000073905.8	VDAC1P1	27.6353	-0.89946	0.287721	-3.12615	0.0017711	0.00447594
ENSG00000073910.15	FRY	8121.66	1.17832	0.0430159	27.3925	3.36688e-165	1.4699e-163
ENSG00000073921.13	PICALM	7055.35	-0.223996	0.0659763	-3.39511	0.000686023	0.00182053
ENSG00000073969.14	NSF	2971.43	-0.15009	0.0665563	-2.25509	0.0241279	0.0496555
ENSG00000074047.16	GLI2	31.2488	-5.78285	0.690261	-8.37777	5.39399e-17	2.83643e-16
ENSG00000074054.13	CLASP1	4404.65	-0.0170734	0.0429353	-0.397655	0.690885	0.768594
ENSG00000074071.9	MRPS34	3684.39	1.06153	0.121266	8.75374	2.06403e-18	1.13471e-17
ENSG00000074181.4	NOTCH3	13.0256	-2.19285	0.507392	-4.32181	1.54754e-05	4.78665e-05
ENSG00000074201.4	CLNS1A	17876.2	0.973828	0.0502974	19.3614	1.63402e-83	2.92387e-82
ENSG00000074211.9	PPP2R2C	1.2923	2.42325	1.17763	2.05774	0.0396155	0.0767209
ENSG00000074219.9	TEAD2	1.22546	0.538323	1.24513	0.432344	0.665491	0.748128
ENSG00000074266.13	EED	2219.27	0.420788	0.0597583	7.0415	1.90181e-12	8.44932e-12
ENSG00000074276.6	CDHR2	31.7157	-0.0793693	0.290389	-0.273321	0.784607	0.841729
ENSG00000074317.6	SNCB	0	NA	NA	NA	NA	NA
ENSG00000074319.8	TSG101	1582.61	1.4198	0.0612022	23.1985	4.70979e-119	1.30593e-117
ENSG00000074356.12	C17orf85	2002.2	0.876551	0.0555096	15.791	3.58971e-56	4.41086e-55
ENSG00000074370.13	ATP2A3	6577.44	0.263191	0.136352	1.93024	0.053577	0.0992855
ENSG00000074410.9	CA12	4.81611	-1.9216	0.731566	-2.6267	0.00862172	0.0195935
ENSG00000074416.9	MGLL	830.847	-1.51064	0.0909144	-16.616	5.33498e-62	7.18713e-61
ENSG00000074527.7	NTN4	0.379465	0.592786	1.35963	0.435992	0.662843	NA
ENSG00000074582.8	BCS1L	2241.55	1.1294	0.059202	19.0771	3.91229e-81	6.77382e-80
ENSG00000074590.9	NUAK1	1.27574	1.69306	1.11939	1.51248	0.130411	0.206197
ENSG00000074603.14	DPP8	5876.27	0.0881627	0.0699529	1.26032	0.207556	0.295512
ENSG00000074621.9	SLC24A1	553.015	0.670886	0.0802093	8.36419	6.05275e-17	3.17735e-16
ENSG00000074657.9	ZNF532	1.84007	2.23444	1.05559	2.11676	0.0342799	0.0674638
ENSG00000074660.11	SCARF1	615.459	-7.15925	0.387356	-18.4824	2.86273e-76	4.63282e-75
ENSG00000074695.5	LMAN1	28634.7	0.850033	0.0709362	11.9831	4.35869e-33	3.54287e-32
ENSG00000074696.8	PTPLAD1	9288.44	-0.251634	0.0605827	-4.15357	3.27329e-05	9.86227e-05
ENSG00000074706.9	IPCEF1	671.018	1.37595	0.0803635	17.1215	1.02544e-65	1.45273e-64
ENSG00000074755.10	ZZEF1	3427.36	0.321554	0.0490881	6.55054	5.73276e-11	2.3957e-10
ENSG00000074771.3	NOX3	0.264036	1.40579	1.30977	1.07331	0.283133	NA
ENSG00000074800.9	ENO1	153937	0.229042	0.0537336	4.26255	2.02105e-05	6.1928e-05
ENSG00000074803.13	SLC12A1	2.35374	3.19735	1.11593	2.8652	0.00416752	0.0099966
ENSG00000074842.3	C19orf10	5749.14	-0.579244	0.0599046	-9.66943	4.06638e-22	2.5003e-21
ENSG00000074855.6	ANO8	126.911	-4.52737	0.281318	-16.0934	2.83679e-58	3.59591e-57
ENSG00000074935.9	TUBE1	1157.86	1.36383	0.0736373	18.5209	1.40175e-76	2.27938e-75
ENSG00000074964.12	ARHGEF10L	9.23325	5.95737	1.09527	5.43917	5.35291e-08	1.93086e-07
ENSG00000074966.6	TXK	231.766	-4.3668	0.187997	-23.2281	2.37119e-119	6.59281e-118
ENSG00000075035.5	WSCD2	0.531114	2.15324	1.35961	1.58372	0.113258	0.184845
ENSG00000075043.13	KCNQ2	0.776804	1.7088	1.25151	1.36539	0.17213	0.25511
ENSG00000075073.10	TACR2	4.78269	-0.763778	0.691509	-1.10451	0.269373	0.367078
ENSG00000075089.5	ACTR6	1650.49	0.198294	0.0697196	2.84417	0.00445269	0.0106404
ENSG00000075131.5	TIPIN	1718.27	0.593763	0.0608954	9.75055	1.83471e-22	1.14077e-21
ENSG00000075142.9	SRI	3554.52	-0.243396	0.0493272	-4.93432	8.04286e-07	2.71417e-06
ENSG00000075151.15	EIF4G3	6174.55	-0.103967	0.0548065	-1.89699	0.0578295	0.106249
ENSG00000075188.4	NUP37	3211.76	0.350748	0.0558162	6.28398	3.30019e-10	1.33113e-09
ENSG00000075213.6	SEMA3A	20.6321	5.74621	0.779541	7.37128	1.69003e-13	7.80779e-13
ENSG00000075218.14	GTSE1	1951.36	-0.809558	0.0512056	-15.8099	2.65721e-56	3.27429e-55
ENSG00000075223.9	SEMA3C	3.3019	4.67074	1.18893	3.92852	8.54689e-05	0.000248
ENSG00000075234.12	TTC38	733.39	-2.12931	0.0853379	-24.9516	2.05333e-137	6.8309e-136
ENSG00000075239.9	ACAT1	9747.96	-0.205227	0.051104	-4.01587	5.92267e-05	0.000174412
ENSG00000075240.12	GRAMD4	7475.36	1.5554	0.0965107	16.1163	1.95966e-58	2.49131e-57
ENSG00000075275.12	CELSR1	157.957	-0.640133	0.160047	-3.99965	6.34367e-05	0.000186413
ENSG00000075290.7	WNT8B	4.02366	0.671123	0.690971	0.971275	0.331411	0.434071
ENSG00000075292.14	ZNF638	12452.1	0.88876	0.0641659	13.851	1.25485e-43	1.25539e-42
ENSG00000075303.8	SLC25A40	3272.35	0.456162	0.0733966	6.21503	5.13139e-10	2.04832e-09
ENSG00000075336.7	TIMM21	3134.92	1.29847	0.0606071	21.4244	7.91517e-102	1.80945e-100
ENSG00000075340.18	ADD2	16.9145	5.47534	0.792958	6.90496	5.02177e-12	2.19585e-11
ENSG00000075388.2	FGF4	0	NA	NA	NA	NA	NA
ENSG00000075391.12	RASAL2	925.344	1.93716	0.0763068	25.3865	3.55728e-142	1.24599e-140
ENSG00000075399.8	VPS9D1	81.9021	-0.111863	0.243927	-0.458592	0.646527	0.731532
ENSG00000075407.13	ZNF37A	5583.71	0.0411047	0.0563308	0.729702	0.465572	0.567995
ENSG00000075413.13	MARK3	4718.83	0.139543	0.0440814	3.16558	0.00154777	0.00394654
ENSG00000075415.8	SLC25A3	27797.3	0.00539896	0.0503173	0.107298	0.914552	0.941442
ENSG00000075420.8	FNDC3B	23359.2	-1.52407	0.0577647	-26.3841	2.08856e-153	8.18054e-152
ENSG00000075426.7	FOSL2	1500.3	0.297667	0.061851	4.81265	1.48942e-06	4.94358e-06
ENSG00000075429.4	CACNG5	0	NA	NA	NA	NA	NA
ENSG00000075461.5	CACNG4	0	NA	NA	NA	NA	NA
ENSG00000075539.9	FRYL	8189.75	0.806908	0.0561989	14.3581	9.48209e-47	1.00574e-45
ENSG00000075568.12	TMEM131	4389.47	-0.0339835	0.0567155	-0.599193	0.549044	0.643872
ENSG00000075618.13	FSCN1	4756.57	-9.95941	0.253836	-39.2355	0	0
ENSG00000075624.9	ACTB	160835	-0.340311	0.0787376	-4.32209	1.5456e-05	4.78164e-05
ENSG00000075643.5	MOCOS	4.20905	-1.22739	0.831506	-1.47611	0.139915	0.218301
ENSG00000075651.11	PLD1	4785.89	-1.65851	0.060039	-27.6239	5.74713e-168	2.57169e-166
ENSG00000075673.7	ATP12A	0.89651	1.83844	1.26362	1.4549	0.145697	0.223985
ENSG00000075702.12	WDR62	1788.5	-0.186565	0.0879664	-2.12086	0.0339336	0.0668341
ENSG00000075711.16	DLG1	6851.44	-0.756094	0.0683168	-11.0675	1.80409e-28	1.30182e-27
ENSG00000075785.8	RAB7A	5092.82	-0.0669582	0.0519383	-1.28919	0.197333	0.283193
ENSG00000075790.6	BCAP29	2329.07	0.0561265	0.0821396	0.683306	0.494413	0.594213
ENSG00000075826.12	SEC31B	726.491	0.948548	0.0695694	13.6346	2.49455e-42	2.42168e-41
ENSG00000075856.7	SART3	7566.5	0.318269	0.0420129	7.57553	3.57674e-14	1.69746e-13
ENSG00000075884.8	ARHGAP15	5920.78	-0.576345	0.0625172	-9.21898	2.99938e-20	1.74096e-19
ENSG00000075886.10	TUBA3D	0.264036	1.40579	1.30977	1.07331	0.283133	NA
ENSG00000075891.17	PAX2	0.267373	1.4139	1.31098	1.07851	0.280806	NA
ENSG00000075914.8	EXOSC7	2925.85	0.272019	0.0436473	6.23221	4.59902e-10	1.84064e-09
ENSG00000075945.8	KIFAP3	1167.13	-0.0918592	0.0829951	-1.1068	0.268379	0.365905
ENSG00000075975.11	MKRN2	4036.74	0.117855	0.0426113	2.76581	0.00567823	0.0133297
ENSG00000076003.4	MCM6	16184.8	0.939521	0.0567103	16.567	1.20683e-61	1.61439e-60
ENSG00000076043.5	REXO2	1824.28	0.145182	0.0688833	2.10765	0.035061	0.0688543
ENSG00000076053.6	RBM7	1792.21	-0.315831	0.0937252	-3.36976	0.000752345	0.00198667
ENSG00000076067.7	RBMS2	80.9296	-0.36424	0.182893	-1.99155	0.0464209	0.0876882
ENSG00000076108.7	BAZ2A	4289.77	-0.142148	0.043959	-3.23364	0.00122221	0.00315338
ENSG00000076201.10	PTPN23	934.585	-0.676303	0.108461	-6.23542	4.5056e-10	1.80443e-09
ENSG00000076242.10	MLH1	4366.4	0.888592	0.0540737	16.433	1.11066e-60	1.45758e-59
ENSG00000076248.6	UNG	8188.47	0.73225	0.0437923	16.721	9.21921e-63	1.25699e-61
ENSG00000076258.5	FMO4	121.202	0.511829	0.147533	3.46926	0.000521895	0.00139998
ENSG00000076321.6	KLHL20	1476.03	0.0556127	0.0626987	0.886984	0.375088	0.480113
ENSG00000076344.11	RGS11	0.48295	-0.720993	1.35388	-0.532537	0.594354	0.684418
ENSG00000076351.8	SLC46A1	8.73527	4.53876	0.842115	5.38971	7.05702e-08	2.52998e-07
ENSG00000076356.6	PLXNA2	3.34655	-0.0941769	0.819026	-0.114987	0.908456	0.938419
ENSG00000076382.12	SPAG5	5233.44	0.696778	0.0586086	11.8887	1.35543e-32	1.08609e-31
ENSG00000076513.12	ANKRD13A	5421.07	0.315657	0.05082	6.21128	5.25547e-10	2.0962e-09
ENSG00000076554.11	TPD52	832.955	11.614	0.853993	13.5996	4.0253e-42	3.89036e-41
ENSG00000076555.11	ACACB	493.236	-0.369647	0.0886337	-4.1705	3.03927e-05	9.18079e-05
ENSG00000076604.10	TRAF4	225.852	1.67606	0.152611	10.9826	4.63406e-28	3.31022e-27
ENSG00000076641.4	PAG1	974.954	-1.61832	0.0744653	-21.7325	1.01173e-104	2.37522e-103
ENSG00000076650.2	GPATCH1	1326.64	0.367893	0.0537126	6.8493	7.42146e-12	3.21973e-11
ENSG00000076662.5	ICAM3	3100.52	0.189402	0.112994	1.67621	0.0936962	0.157537
ENSG00000076685.14	NT5C2	10091.1	-0.429504	0.0548744	-7.82703	4.99513e-15	2.44407e-14
ENSG00000076706.10	MCAM	48.5653	-4.99821	0.466195	-10.7213	8.0855e-27	5.61124e-26
ENSG00000076716.7	GPC4	0.52521	2.38296	1.35538	1.75814	0.0787232	0.137176
ENSG00000076770.10	MBNL3	3984.62	1.16895	0.0861005	13.5766	5.51302e-42	5.32314e-41
ENSG00000076826.5	CAMSAP3	9.14871	-2.30015	0.545467	-4.21684	2.47748e-05	7.53532e-05
ENSG00000076864.15	RAP1GAP	14.9153	0.480121	0.403776	1.18908	0.234409	0.327097
ENSG00000076924.7	XAB2	2462.54	-0.189479	0.156656	-1.20952	0.226462	0.317447
ENSG00000076928.13	ARHGEF1	4111.72	0.36568	0.15134	2.41628	0.0156798	0.0336962
ENSG00000076944.10	STXBP2	1231.4	0.338114	0.164224	2.05886	0.0395081	0.0765566
ENSG00000076984.13	MAP2K7	1267.23	-0.28542	0.148629	-1.92035	0.0548134	0.101349
ENSG00000077009.9	NMRK2	0.264036	1.40579	1.30977	1.07331	0.283133	NA
ENSG00000077044.5	DGKD	2147.24	0.630414	0.0852655	7.39354	1.42966e-13	6.62902e-13
ENSG00000077063.6	CTTNBP2	2.65066	0.773012	0.850522	0.908868	0.36342	0.468049
ENSG00000077080.5	ACTL6B	0.494669	0.129302	1.32406	0.097656	0.922205	0.945823
ENSG00000077092.14	RARB	0.515335	0.890196	1.35971	0.654696	0.512663	0.611109
ENSG00000077097.9	TOP2B	37020	0.32603	0.0619424	5.26344	1.41388e-07	4.98036e-07
ENSG00000077147.10	TM9SF3	20438.6	0.306912	0.077431	3.96368	7.38023e-05	0.000215316
ENSG00000077150.13	NFKB2	390.974	-2.24323	0.12177	-18.4219	8.77266e-76	1.4122e-74
ENSG00000077152.5	UBE2T	2162.39	0.0805622	0.065705	1.22612	0.220154	0.310188
ENSG00000077157.16	PPP1R12B	2023.49	0.455538	0.0508592	8.95685	3.34074e-19	1.88035e-18
ENSG00000077232.12	DNAJC10	8064.46	0.441481	0.0644711	6.84774	7.50263e-12	3.2531e-11
ENSG00000077235.13	GTF3C1	5306.33	0.863056	0.0743855	11.6025	4.00316e-31	3.0993e-30
ENSG00000077238.9	IL4R	1383.22	-2.68447	0.0952792	-28.1748	1.19238e-174	5.61598e-173
ENSG00000077254.10	USP33	7046.63	-0.308878	0.0589639	-5.23843	1.61953e-07	5.68373e-07
ENSG00000077264.10	PAK3	704.365	-9.31298	0.55567	-16.7599	4.79363e-63	6.55933e-62
ENSG00000077274.7	CAPN6	0.758085	1.60811	1.28685	1.24965	0.211427	0.299903
ENSG00000077279.12	DCX	1.30658	1.70174	1.10383	1.54167	0.123153	0.197705
ENSG00000077312.4	SNRPA	5627.81	0.0557788	0.0719104	0.77567	0.437944	0.542057
ENSG00000077327.11	SPAG6	487.495	-8.07182	0.395634	-20.4022	1.5971e-92	3.24024e-91
ENSG00000077348.4	EXOSC5	2525.82	1.00555	0.155611	6.46194	1.03366e-10	4.26583e-10
ENSG00000077380.11	DYNC1I2	3911.69	0.205906	0.0597214	3.44777	0.000565239	0.00151225
ENSG00000077420.11	APBB1IP	2159.06	-1.82805	0.0502923	-36.3486	2.76301e-289	2.97516e-287
ENSG00000077454.11	LRCH4	2827.45	-0.734262	0.144479	-5.08213	3.73233e-07	1.28311e-06
ENSG00000077458.8	FAM76B	2668.54	0.044155	0.0889308	0.49651	0.619535	0.707373
ENSG00000077463.10	SIRT6	424.635	1.21515	0.1823	6.66565	2.63504e-11	1.11555e-10
ENSG00000077498.8	TYR	0.135089	0.899545	1.21864	0.738155	0.46042	NA
ENSG00000077514.4	POLD3	3539.49	0.659613	0.0571305	11.5457	7.75772e-31	5.96821e-30
ENSG00000077522.8	ACTN2	5.21592	-0.673098	0.616524	-1.09176	0.274937	0.373259
ENSG00000077549.13	CAPZB	7121.96	-0.577851	0.0496216	-11.6451	2.42903e-31	1.8897e-30
ENSG00000077585.9	GPR137B	198.248	-1.0028	0.125083	-8.01709	1.08283e-15	5.43074e-15
ENSG00000077616.6	NAALAD2	2.73643	2.30117	1.00472	2.29036	0.0220004	0.0456595
ENSG00000077684.11	PHF17	6838.95	0.66897	0.0471873	14.1769	1.27345e-45	1.31724e-44
ENSG00000077713.14	SLC25A43	1391.21	-0.484272	0.0618788	-7.82613	5.03105e-15	2.46125e-14
ENSG00000077721.11	UBE2A	3486.24	-0.219927	0.0523809	-4.19862	2.68548e-05	8.1468e-05
ENSG00000077782.15	FGFR1	1469.56	-1.61329	0.0562905	-28.6602	1.19796e-180	5.85962e-179
ENSG00000077800.7	FKBP6	0.644282	1.24879	1.34327	0.929669	0.352542	0.456878
ENSG00000077809.8	GTF2I	8895.67	0.240833	0.0542137	4.4423	8.90037e-06	2.7972e-05
ENSG00000077935.12	SMC1B	27.1884	-2.25098	0.342371	-6.57468	4.87571e-11	2.04371e-10
ENSG00000077942.13	FBLN1	1.54994	1.48142	1.00236	1.47793	0.139426	0.217648
ENSG00000077943.7	ITGA8	1.3087	2.39637	1.18747	2.01804	0.0435869	0.0832115
ENSG00000077984.4	CST7	5001.49	2.11062	0.0867331	24.3346	8.43569e-131	2.64194e-129
ENSG00000078018.15	MAP2	4.22018	4.1004	1.00846	4.066	4.78273e-05	0.000141926
ENSG00000078043.11	PIAS2	3122.04	0.791091	0.0590309	13.4013	5.93984e-41	5.60907e-40
ENSG00000078053.12	AMPH	1.42119	2.54673	1.16808	2.18028	0.0292367	0.058881
ENSG00000078061.8	ARAF	3708.13	-0.0119314	0.0977927	-0.122007	0.902894	0.934743
ENSG00000078070.7	MCCC1	6899.3	-1.18846	0.0503138	-23.621	2.34803e-123	6.76931e-122
ENSG00000078081.3	LAMP3	109.076	-3.24593	0.202631	-16.0189	9.42643e-58	1.18454e-56
ENSG00000078098.9	FAP	2.46575	1.81488	0.92486	1.96233	0.0497236	0.0930443
ENSG00000078114.14	NEBL	3.14005	0.492902	0.735075	0.670546	0.50251	0.601977
ENSG00000078124.7	ACER3	1660.05	-0.717841	0.07997	-8.97638	2.79814e-19	1.57903e-18
ENSG00000078140.9	UBE2K	7128.49	0.172728	0.088684	1.94768	0.051453	0.095798
ENSG00000078142.7	PIK3C3	4550.53	0.881886	0.0558505	15.7901	3.6386e-56	4.46913e-55
ENSG00000078177.9	N4BP2	3746.81	1.44958	0.0830126	17.4621	2.7831e-68	4.05982e-67
ENSG00000078237.4	C12orf5	360.234	-0.593351	0.0934613	-6.34863	2.1724e-10	8.83012e-10
ENSG00000078246.11	TULP3	386.069	-1.04586	0.111212	-9.40415	5.24547e-21	3.12625e-20
ENSG00000078269.9	SYNJ2	1699.36	0.564431	0.0526389	10.7227	7.96511e-27	5.52895e-26
ENSG00000078295.11	ADCY2	2.40659	1.16515	0.84753	1.37476	0.169205	0.252539
ENSG00000078304.15	PPP2R5C	6944.08	-0.260377	0.0643744	-4.04473	5.23832e-05	0.000154933
ENSG00000078319.7	PMS2P1	980.201	-0.50838	0.0691226	-7.35475	1.91285e-13	8.81719e-13
ENSG00000078328.15	RBFOX1	3.29258	3.72463	1.04283	3.57167	0.000354718	0.000969186
ENSG00000078369.13	GNB1	21447.5	-0.404661	0.0337184	-12.0012	3.50256e-33	2.85536e-32
ENSG00000078399.11	HOXA9	5.23033	5.22345	1.14854	4.5479	5.41847e-06	1.72717e-05
ENSG00000078401.6	EDN1	0.396025	1.8587	1.3527	1.37407	0.16942	0.252539
ENSG00000078403.12	MLLT10	1841.33	0.311548	0.049588	6.28274	3.32661e-10	1.34161e-09
ENSG00000078487.13	ZCWPW1	169.725	0.691786	0.122704	5.63782	1.72213e-08	6.38423e-08
ENSG00000078549.10	ADCYAP1R1	0.807728	2.70924	1.34617	2.01256	0.044161	0.0841599
ENSG00000078579.8	FGF20	0	NA	NA	NA	NA	NA
ENSG00000078589.8	P2RY10	92.4325	6.93837	0.562053	12.3447	5.20326e-35	4.39465e-34
ENSG00000078596.6	ITM2A	4732.08	-1.64022	0.0651253	-25.1855	5.76878e-140	1.96635e-138
ENSG00000078618.15	NRD1	11468.6	-0.155516	0.0498302	-3.12092	0.00180284	0.00455162
ENSG00000078668.9	VDAC3	8605.46	-0.92516	0.0618263	-14.9638	1.26501e-50	1.43144e-49
ENSG00000078674.13	PCM1	14079.1	-0.199136	0.059698	-3.33572	0.000850795	0.00223522
ENSG00000078687.12	TNRC6C	1200.91	-0.415744	0.0625525	-6.64632	3.00519e-11	1.26926e-10
ENSG00000078699.17	CBFA2T2	886.853	-0.406909	0.0621259	-6.54975	5.76329e-11	2.40813e-10
ENSG00000078725.8	BRINP1	1.25363	1.48299	1.24746	1.18881	0.234515	0.327192
ENSG00000078747.8	ITCH	6162.75	-0.705573	0.0627583	-11.2427	2.51569e-29	1.86069e-28
ENSG00000078795.12	PKD2L2	2.77406	-3.35787	1.06559	-3.15119	0.00162606	0.00413476
ENSG00000078804.8	TP53INP2	43.5852	-2.49811	0.305125	-8.18718	2.6742e-16	1.37167e-15
ENSG00000078808.12	SDF4	6417.46	-0.53286	0.142276	-3.74527	0.000180201	0.000508311
ENSG00000078814.11	MYH7B	4.84923	1.56661	0.710033	2.20639	0.0273569	0.0556544
ENSG00000078898.6	BPIFB2	0.246175	0.06303	1.33553	0.0471949	0.962358	NA
ENSG00000078900.10	TP73	235.147	-5.19073	0.426603	-12.1676	4.62549e-34	3.84172e-33
ENSG00000078902.11	TOLLIP	1274.23	0.489519	0.107564	4.55094	5.34057e-06	1.70358e-05
ENSG00000078967.8	UBE2D4	1076.66	0.52356	0.0585938	8.93541	4.05667e-19	2.27659e-18
ENSG00000079101.12	CLUL1	2.01247	0.488998	0.890465	0.54915	0.582903	0.673931
ENSG00000079102.12	RUNX1T1	2520.79	-10.11	0.367794	-27.4881	2.43606e-166	1.07275e-164
ENSG00000079112.5	CDH17	0.881453	1.12474	1.17817	0.954646	0.339757	0.443154
ENSG00000079134.7	THOC1	4925.81	0.719086	0.067985	10.5771	3.80464e-26	2.58734e-25
ENSG00000079150.13	FKBP7	692.954	-0.829227	0.0706187	-11.7423	7.73417e-32	6.09159e-31
ENSG00000079156.12	OSBPL6	437.219	-6.48307	0.273071	-23.7413	1.35081e-124	3.95799e-123
ENSG00000079215.9	SLC1A3	158.342	-0.270594	0.136609	-1.98079	0.0476152	0.0896275
ENSG00000079246.11	XRCC5	28500.6	1.03335	0.0578139	17.8738	1.88848e-71	2.87308e-70
ENSG00000079257.3	LXN	1144.41	-1.66319	0.0592671	-28.0626	2.79986e-173	1.30659e-171
ENSG00000079263.14	SP140	196.819	3.9159	0.171199	22.8734	8.55929e-116	2.29601e-114
ENSG00000079277.15	MKNK1	1423.39	-0.236482	0.0571833	-4.13551	3.5416e-05	0.000106381
ENSG00000079308.12	TNS1	115.022	-4.58009	0.274179	-16.7047	1.21099e-62	1.64597e-61
ENSG00000079313.7	REXO1	869.302	0.501756	0.152375	3.29291	0.000991575	0.00258347
ENSG00000079332.10	SAR1A	8281.84	-0.169735	0.0609349	-2.78552	0.00534426	0.012603
ENSG00000079335.13	CDC14A	1084.76	-0.0191868	0.0773058	-0.248194	0.803984	0.85868
ENSG00000079337.11	RAPGEF3	43.6955	-1.5709	0.240423	-6.5339	6.40772e-11	2.6708e-10
ENSG00000079385.17	CEACAM1	1.30808	3.49512	1.28684	2.71604	0.00660674	0.0153334
ENSG00000079387.9	SENP1	2453.72	0.24398	0.0618063	3.9475	7.89711e-05	0.000229846
ENSG00000079393.16	DUSP13	0.258341	0.056695	1.32155	0.0429003	0.965781	NA
ENSG00000079432.3	CIC	1560.29	-1.13421	0.165898	-6.83679	8.09879e-12	3.50461e-11
ENSG00000079435.5	LIPE	120.865	-4.52442	0.274931	-16.4565	7.52924e-61	9.90668e-60
ENSG00000079459.8	FDFT1	13707.1	-1.65807	0.0495305	-33.4758	1.08294e-245	9.01652e-244
ENSG00000079462.3	PAFAH1B3	809.376	-2.23596	0.159455	-14.0225	1.13509e-44	1.15606e-43
ENSG00000079482.11	OPHN1	300.551	0.760184	0.112436	6.76106	1.36981e-11	5.87672e-11
ENSG00000079557.3	AFM	0.396025	1.8587	1.3527	1.37407	0.16942	0.252539
ENSG00000079616.8	KIF22	6359.22	0.674797	0.0698205	9.66475	4.25678e-22	2.61473e-21
ENSG00000079689.9	SCGN	0.415278	1.50094	1.31474	1.14163	0.253608	0.349644
ENSG00000079691.15	LRRC16A	39.2435	-2.86337	0.320871	-8.92374	4.50796e-19	2.52753e-18
ENSG00000079739.11	PGM1	3236.89	0.726353	0.0541209	13.4209	4.55908e-41	4.31725e-40
ENSG00000079785.10	DDX1	10172.5	0.0401879	0.060805	0.66093	0.508657	0.607474
ENSG00000079805.12	DNM2	9152.78	-0.0118873	0.0858033	-0.138541	0.889813	0.925467
ENSG00000079819.12	EPB41L2	1433.51	-8.54189	0.300106	-28.4629	3.37536e-178	1.62492e-176
ENSG00000079841.14	RIMS1	1.70984	2.82467	1.12464	2.51163	0.0120176	0.0265339
ENSG00000079931.10	MOXD1	3.31103	4.66831	1.18878	3.92697	8.60223e-05	0.000249582
ENSG00000079950.9	STX7	3283.83	1.65223	0.0812616	20.3323	6.66269e-92	1.33838e-90
ENSG00000079974.13	RABL2B	464.081	1.13011	0.0872753	12.9488	2.3853e-38	2.16074e-37
ENSG00000079999.9	KEAP1	5534.66	-0.599996	0.102491	-5.85415	4.79448e-09	1.82856e-08
ENSG00000080007.6	DDX43	3.38521	3.75732	1.04861	3.58315	0.000339476	0.000928956
ENSG00000080031.5	PTPRH	19.9047	-3.95979	0.565164	-7.00644	2.44462e-12	1.08057e-11
ENSG00000080166.11	DCT	0.632237	1.36157	1.30743	1.04141	0.297684	0.3979
ENSG00000080189.10	SLC35C2	3672.14	0.147088	0.0989826	1.486	0.137279	0.215634
ENSG00000080200.5	CRYBG3	1262.89	0.4371	0.059243	7.37808	1.60589e-13	7.4292e-13
ENSG00000080224.13	EPHA6	1.67854	2.78596	1.13675	2.45081	0.0142537	0.0309126
ENSG00000080293.5	SCTR	0.393221	1.99893	1.35858	1.47134	0.141198	0.218985
ENSG00000080298.11	RFX3	580.63	0.501168	0.0971285	5.15984	2.47155e-07	8.57711e-07
ENSG00000080345.13	RIF1	18444	0.758502	0.0647617	11.7122	1.10374e-31	8.6575e-31
ENSG00000080371.4	RAB21	5898.31	0.271868	0.0825959	3.29155	0.000996385	0.00259556
ENSG00000080493.9	SLC4A4	378.93	-4.10027	0.141263	-29.0257	3.11503e-185	1.56641e-183
ENSG00000080503.15	SMARCA2	11013.7	1.31979	0.0443923	29.7301	3.13231e-194	1.72918e-192
ENSG00000080511.2	RDH8	0.264274	1.46239	1.31931	1.10845	0.267667	NA
ENSG00000080546.9	SESN1	708.826	-0.693906	0.0742913	-9.34034	9.60216e-21	5.66408e-20
ENSG00000080561.9	MID2	2.86534	4.45189	1.21046	3.67784	0.000235222	0.000655802
ENSG00000080572.8	PIH1D3	0.128947	0.881431	1.21709	0.72421	0.468937	NA
ENSG00000080573.6	COL5A3	4.07394	2.6376	0.823006	3.20483	0.00135141	0.00347113
ENSG00000080603.12	SRCAP	2347.74	0.904678	0.101981	8.87108	7.24396e-19	4.0363e-18
ENSG00000080608.9	KIAA0020	7275.35	0.432488	0.0491526	8.79889	1.38179e-18	7.62812e-18
ENSG00000080618.9	CPB2	1.2834	1.10326	1.14191	0.966151	0.333969	0.436651
ENSG00000080644.11	CHRNA3	0.371082	-0.387019	1.35972	-0.284632	0.775926	NA
ENSG00000080709.10	KCNN2	418.357	7.92856	0.389765	20.3419	5.47949e-92	1.10434e-90
ENSG00000080802.14	CNOT4	1265.53	0.163062	0.0740088	2.20328	0.0275752	0.056054
ENSG00000080815.14	PSEN1	3342.31	-0.248871	0.0587976	-4.23267	2.30931e-05	7.03928e-05
ENSG00000080819.2	CPOX	2520.04	-0.0280163	0.0675232	-0.414914	0.678205	0.758655
ENSG00000080822.12	CLDND1	2997.99	-1.1237	0.0782869	-14.3536	1.01135e-46	1.07196e-45
ENSG00000080823.17	MOK	112.672	0.527326	0.143879	3.66506	0.000247279	0.000687718
ENSG00000080824.14	HSP90AA1	66431.3	-0.291283	0.0621347	-4.68794	2.75974e-06	8.96752e-06
ENSG00000080839.7	RBL1	5811.24	1.23944	0.0603419	20.5403	9.39026e-94	1.95058e-92
ENSG00000080845.13	DLGAP4	380.308	-4.2456	0.146081	-29.0634	1.04317e-185	5.29808e-184
ENSG00000080854.10	IGSF9B	65.9118	-4.55157	0.378299	-12.0317	2.42157e-33	1.98154e-32
ENSG00000080910.7	CFHR2	0	NA	NA	NA	NA	NA
ENSG00000080947.10	CROCCP3	30.7765	-3.47995	0.40766	-8.53639	1.38478e-17	7.41101e-17
ENSG00000080986.8	NDC80	3847.86	0.265985	0.0666405	3.99134	6.57014e-05	0.00019279
ENSG00000081014.6	AP4E1	3168.8	-0.0482744	0.0759572	-0.635547	0.525072	0.62283
ENSG00000081019.9	RSBN1	3467.54	0.408814	0.072358	5.64987	1.60568e-08	5.95834e-08
ENSG00000081026.14	MAGI3	623.957	-0.392125	0.0822928	-4.765	1.88855e-06	6.22227e-06
ENSG00000081041.8	CXCL2	35.6642	-0.0979331	0.284916	-0.343726	0.731052	0.797385
ENSG00000081051.3	AFP	0.899711	2.86568	1.33811	2.14158	0.0322272	0.063851
ENSG00000081052.10	COL4A4	1.92581	1.79206	1.02818	1.74294	0.0813446	0.14113
ENSG00000081059.15	TCF7	4.25825	-1.95093	0.753627	-2.58872	0.00963342	0.0216441
ENSG00000081087.10	OSTM1	1870.98	0.837771	0.0864595	9.68975	3.33358e-22	2.0547e-21
ENSG00000081138.9	CDH7	1.31738	3.33929	1.30693	2.55506	0.010617	0.0236587
ENSG00000081148.11	IMPG2	48.5984	-2.38037	0.300555	-7.91991	2.37691e-15	1.17794e-14
ENSG00000081154.7	PCNP	8405.7	0.468765	0.100546	4.66218	3.12885e-06	1.01259e-05
ENSG00000081177.14	EXD2	777.683	-0.368822	0.0797988	-4.62189	3.80258e-06	1.22439e-05
ENSG00000081181.3	ARG2	358.954	-5.56153	0.224164	-24.8101	6.97819e-136	2.28406e-134
ENSG00000081189.9	MEF2C	1497.8	-8.22795	0.242016	-33.9975	2.42517e-253	2.11754e-251
ENSG00000081237.14	PTPRC	6352.66	-1.07216	0.0550458	-19.4776	1.69918e-84	3.08944e-83
ENSG00000081248.6	CACNA1S	0.881337	1.06813	1.21549	0.878768	0.379527	0.484635
ENSG00000081277.7	PKP1	1.27736	1.7003	1.10539	1.53819	0.124003	0.19885
ENSG00000081307.8	UBA5	2947.26	0.936598	0.0596813	15.6933	1.68067e-55	2.04533e-54
ENSG00000081320.6	STK17B	5225.97	1.03983	0.0671621	15.4824	4.56127e-54	5.44867e-53
ENSG00000081377.12	CDC14B	9.60375	1.83548	0.565214	3.24741	0.00116462	0.00301397
ENSG00000081386.8	ZNF510	2317.3	-0.158889	0.0615696	-2.58064	0.00986171	0.0221049
ENSG00000081479.8	LRP2	29.4373	-1.18052	0.271845	-4.34263	1.40787e-05	4.36885e-05
ENSG00000081665.9	ZNF506	1687.23	1.16035	0.0638948	18.1603	1.06445e-73	1.666e-72
ENSG00000081692.8	JMJD4	2089.64	0.0218915	0.132224	0.165563	0.868501	0.910167
ENSG00000081721.7	DUSP12	1615.97	-0.474787	0.0520505	-9.12165	7.39889e-20	4.24847e-19
ENSG00000081760.12	AACS	904.428	-1.47304	0.0996307	-14.785	1.83e-49	2.03598e-48
ENSG00000081791.4	KIAA0141	4602.27	0.119021	0.0636098	1.87111	0.0613301	0.111218
ENSG00000081800.4	SLC13A1	0.798724	2.89051	1.3302	2.17298	0.0297815	0.0598005
ENSG00000081803.11	CADPS2	1.46552	3.60321	1.27981	2.81543	0.00487117	0.0115652
ENSG00000081818.1	PCDHB4	0.666735	2.69195	1.34145	2.00674	0.0447769	0.0850943
ENSG00000081842.13	PCDHA6	0.264274	1.46239	1.31931	1.10845	0.267667	NA
ENSG00000081853.13	PCDHGA2	0.509193	0.973287	1.35317	0.719266	0.471977	0.573788
ENSG00000081870.7	HSPB11	1536.61	-0.217294	0.06186	-3.51267	0.000443631	0.00119868
ENSG00000081913.9	PHLPP1	2249.72	0.317185	0.0535967	5.91799	3.25899e-09	1.25456e-08
ENSG00000081923.6	ATP8B1	2.70677	-0.0702189	0.767548	-0.0914848	0.927107	0.948475
ENSG00000081985.6	IL12RB2	86.4046	4.77216	0.322747	14.7861	1.80158e-49	2.00583e-48
ENSG00000082014.12	SMARCD3	11.7867	-0.689804	0.419461	-1.6445	0.100072	0.167023
ENSG00000082068.4	WDR70	3899.45	-0.512719	0.055297	-9.27209	1.82526e-20	1.0682e-19
ENSG00000082074.11	FYB	4217.11	0.42357	0.0550585	7.6931	1.43617e-14	6.91927e-14
ENSG00000082126.13	MPP4	12.0135	-0.318875	0.454522	-0.701562	0.482952	0.583713
ENSG00000082146.8	STRADB	1335.42	0.618717	0.0739659	8.36489	6.01687e-17	3.15961e-16
ENSG00000082153.13	BZW1	10433.2	0.819272	0.0620051	13.213	7.38394e-40	6.84965e-39
ENSG00000082175.10	PGR	1.89878	2.27999	1.07478	2.12135	0.0338923	0.0667658
ENSG00000082196.16	C1QTNF3	141.719	-1.42259	0.151853	-9.3682	7.37787e-21	4.36809e-20
ENSG00000082212.7	ME2	12938.9	2.02092	0.0611816	33.0315	2.86797e-239	2.25247e-237
ENSG00000082213.13	C5orf22	3035.47	-0.164761	0.0585089	-2.816	0.00486258	0.0115493
ENSG00000082258.8	CCNT2	3814.11	0.16354	0.0767811	2.12995	0.033176	0.0654902
ENSG00000082269.12	FAM135A	2927.59	0.9036	0.0755942	11.9533	6.24049e-33	5.04153e-32
ENSG00000082293.8	COL19A1	3.24596	3.07893	0.988931	3.11339	0.0018495	0.00466093
ENSG00000082397.11	EPB41L3	4199.36	11.3732	0.497509	22.8604	1.15296e-115	3.08735e-114
ENSG00000082438.11	COBLL1	3.5589	2.74363	0.919935	2.98242	0.0028598	0.00702343
ENSG00000082458.7	DLG3	1.71962	-0.587377	0.93404	-0.628857	0.529443	0.627088
ENSG00000082482.9	KCNK2	1.05352	3.25652	1.30345	2.49839	0.0124759	0.0274417
ENSG00000082497.7	SERTAD4	1.44042	3.5846	1.28029	2.79982	0.00511306	0.0120933
ENSG00000082512.10	TRAF5	665.988	-6.78184	0.223969	-30.2803	2.08113e-201	1.22193e-199
ENSG00000082515.12	MRPL22	1805.78	0.0741198	0.0629986	1.17653	0.239383	0.333046
ENSG00000082516.8	GEMIN5	9239.57	0.33486	0.0469425	7.13341	9.79095e-13	4.39605e-12
ENSG00000082556.6	OPRK1	0.254795	1.38261	1.30622	1.05848	0.289836	NA
ENSG00000082641.11	NFE2L1	7322.86	0.490222	0.0613218	7.99425	1.30362e-15	6.52197e-15
ENSG00000082684.10	SEMA5B	1.43659	1.78006	1.14315	1.55715	0.119434	0.192894
ENSG00000082701.10	GSK3B	3392.53	0.705833	0.061632	11.4524	2.28807e-30	1.74137e-29
ENSG00000082781.7	ITGB5	1.78315	0.89065	0.957701	0.929988	0.352377	0.456781
ENSG00000082805.15	ERC1	2790.93	-0.190695	0.0614605	-3.10272	0.00191748	0.00482028
ENSG00000082898.12	XPO1	35525	0.367418	0.0587086	6.25833	3.8912e-10	1.56351e-09
ENSG00000082929.4	C4orf6	0.138426	0.907324	1.21929	0.744142	0.45679	NA
ENSG00000082996.15	RNF13	3351.29	-0.616903	0.0600117	-10.2797	8.69854e-25	5.73373e-24
ENSG00000083067.18	TRPM3	3.13013	3.05221	0.962062	3.17258	0.00151093	0.00385938
ENSG00000083093.5	PALB2	2413.03	1.06537	0.0655151	16.2614	1.85505e-59	2.39327e-58
ENSG00000083097.10	DOPEY1	1645.67	0.951273	0.0691727	13.7522	4.9437e-43	4.88012e-42
ENSG00000083099.6	LYRM2	3567.42	0.155767	0.0619011	2.51638	0.0118567	0.0262046
ENSG00000083123.10	BCKDHB	2090.33	0.701213	0.0677967	10.3429	4.50803e-25	2.99614e-24
ENSG00000083168.5	KAT6A	4721.22	-0.645568	0.0519612	-12.424	1.93548e-35	1.64657e-34
ENSG00000083223.13	ZCCHC6	3152.38	0.452862	0.0574935	7.87674	3.36033e-15	1.65534e-14
ENSG00000083290.15	ULK2	110.329	0.77481	0.151056	5.12928	2.90854e-07	1.00467e-06
ENSG00000083307.6	GRHL2	1.91013	-1.19016	0.951547	-1.25077	0.211019	0.299422
ENSG00000083312.13	TNPO1	18380.4	-0.28177	0.0720652	-3.90994	9.23202e-05	0.000267066
ENSG00000083444.12	PLOD1	2001.11	-1.92832	0.0916934	-21.0301	3.4823e-98	7.62876e-97
ENSG00000083454.17	P2RX5	104.508	-3.98901	0.245564	-16.2442	2.4535e-59	3.15866e-58
ENSG00000083457.7	ITGAE	546.318	-1.3415	0.0882801	-15.196	3.76144e-52	4.34999e-51
ENSG00000083520.10	DIS3	8345.16	0.228253	0.0580088	3.9348	8.32661e-05	0.000241861
ENSG00000083535.11	PIBF1	2263.91	0.0388992	0.0695203	0.559538	0.575795	0.667435
ENSG00000083544.9	TDRD3	1260.01	0.291913	0.0793157	3.68039	0.000232875	0.000649318
ENSG00000083622.8	AC000111.6	0	NA	NA	NA	NA	NA
ENSG00000083635.7	NUFIP1	1393.18	0.585537	0.0550677	10.633	2.09195e-26	1.43641e-25
ENSG00000083642.14	PDS5B	4252.63	0.0937522	0.0781598	1.19949	0.230336	0.322151
ENSG00000083720.8	OXCT1	11095.7	-1.11442	0.0599762	-18.5811	4.57372e-77	7.48925e-76
ENSG00000083750.8	RRAGB	651.153	-0.552796	0.0764375	-7.232	4.75922e-13	2.16298e-12
ENSG00000083782.3	EPYC	0.264036	1.40579	1.30977	1.07331	0.283133	NA
ENSG00000083799.13	CYLD	3224.05	0.33996	0.0593132	5.7316	9.94857e-09	3.73032e-08
ENSG00000083807.5	SLC27A5	986.44	-1.84705	0.0940307	-19.6431	6.6258e-86	1.22965e-84
ENSG00000083812.7	ZNF324	893.543	-0.103854	0.0676607	-1.53492	0.124803	0.199815
ENSG00000083814.8	ZNF671	1130.33	0.332647	0.0706742	4.70677	2.51672e-06	8.20851e-06
ENSG00000083817.8	ZNF416	899.85	0.232488	0.080502	2.88797	0.00387732	0.009338
ENSG00000083828.11	ZNF586	1677.68	0.407621	0.0773954	5.26674	1.38868e-07	4.89329e-07
ENSG00000083838.11	ZNF446	266.387	0.0216642	0.11989	0.180701	0.856603	0.901324
ENSG00000083842.8	ZNF8	0	NA	NA	NA	NA	NA
ENSG00000083844.6	ZNF264	1426.96	-0.204331	0.0547418	-3.73263	0.000189493	0.000533287
ENSG00000083845.4	RPS5	55787	0.0831988	0.105074	0.79181	0.428471	0.532931
ENSG00000083857.9	FAT1	4557.11	9.96742	0.238481	41.7954	0	0
ENSG00000083896.8	YTHDC1	5591.74	0.212199	0.0597353	3.55232	0.000381853	0.00103997
ENSG00000083937.4	CHMP2B	1711.95	0.224468	0.070586	3.18006	0.00147244	0.00376645
ENSG00000084070.7	SMAP2	3900.43	-0.378953	0.0482778	-7.84941	4.17987e-15	2.05308e-14
ENSG00000084072.12	PPIE	3340.41	-0.0285784	0.0443852	-0.643873	0.519658	0.617611
ENSG00000084073.4	ZMPSTE24	6675.94	0.287871	0.0708744	4.0617	4.87158e-05	0.000144436
ENSG00000084090.9	STARD7	21247.9	0.16085	0.0490185	3.28142	0.00103285	0.00268573
ENSG00000084092.6	NOA1	2734.31	0.169852	0.050662	3.35266	0.000800401	0.00210809
ENSG00000084093.11	REST	10744	0.414984	0.0705217	5.88448	3.99299e-09	1.52862e-08
ENSG00000084110.6	HAL	218.636	3.76367	0.161777	23.2646	1.0116e-119	2.82034e-118
ENSG00000084112.10	SSH1	1298.76	0.146421	0.0555185	2.63733	0.0083561	0.0190652
ENSG00000084207.11	GSTP1	19640.6	-0.481337	0.116538	-4.13029	3.62306e-05	0.000108731
ENSG00000084234.12	APLP2	51628.8	-3.17805	0.0335964	-94.595	0	0
ENSG00000084444.9	KIAA1467	820.189	1.68871	0.0776682	21.7426	8.11227e-105	1.90598e-103
ENSG00000084453.12	SLCO1A2	2.86396	2.89925	0.996542	2.90931	0.00362228	0.00875559
ENSG00000084463.3	WBP11	6359.72	0.0340936	0.0487518	0.699331	0.484345	0.585043
ENSG00000084623.7	EIF3I	20428.1	0.235954	0.04566	5.16763	2.37085e-07	8.2389e-07
ENSG00000084628.5	NKAIN1	3.75126	2.22179	0.774348	2.86924	0.00411465	0.00987678
ENSG00000084636.13	COL16A1	2.59761	2.30711	0.930622	2.4791	0.0131713	0.0288318
ENSG00000084652.11	TXLNA	8404.25	0.237544	0.0504135	4.71191	2.45403e-06	8.01174e-06
ENSG00000084674.9	APOB	2.48051	2.67779	1.01562	2.63661	0.00837401	0.0191033
ENSG00000084676.11	NCOA1	1771.46	-0.219824	0.0613533	-3.58292	0.000339768	0.000929589
ENSG00000084693.11	AGBL5	1804.68	-0.566727	0.0574315	-9.86788	5.7364e-23	3.61318e-22
ENSG00000084710.9	EFR3B	2.5044	-1.28488	0.902626	-1.42349	0.154593	0.235616
ENSG00000084731.9	KIF3C	405.777	-4.07876	0.136536	-29.8731	4.3952e-196	2.45752e-194
ENSG00000084733.6	RAB10	9667.63	0.150926	0.0538261	2.80395	0.00504812	0.0119546
ENSG00000084734.4	GCKR	1.17394	1.46328	1.16947	1.25123	0.210851	0.299253
ENSG00000084754.6	HADHA	28500.5	0.161469	0.0481313	3.35477	0.000794307	0.00209258
ENSG00000084764.6	MAPRE3	6.03722	-0.331274	0.595745	-0.556066	0.578165	0.669512
ENSG00000084774.9	CAD	16257.3	0.353317	0.0751264	4.70297	2.56407e-06	8.35758e-06
ENSG00000085063.10	CD59	6995.86	1.71421	0.0567833	30.1887	3.33687e-200	1.92949e-198
ENSG00000085117.7	CD82	2366.59	-1.44098	0.120498	-11.9586	5.85653e-33	4.73762e-32
ENSG00000085185.11	BCORL1	517.268	-1.02916	0.107758	-9.55062	1.28919e-21	7.81026e-21
ENSG00000085224.16	ATRX	7084.91	0.0858083	0.068564	1.25151	0.21075	0.299123
ENSG00000085231.9	TAF9	7450.89	-0.568945	0.0579391	-9.8197	9.26198e-23	5.79549e-22
ENSG00000085265.6	FCN1	3.14219	4.56405	1.20185	3.79753	0.000146144	0.000415355
ENSG00000085274.11	MYNN	3174.48	-0.230467	0.0791666	-2.91117	0.0036008	0.0087078
ENSG00000085276.13	MECOM	2.32349	1.29915	0.986071	1.3175	0.18767	0.272191
ENSG00000085365.13	SCAMP1	4520.82	-0.25194	0.0994557	-2.53319	0.011303	0.0250553
ENSG00000085377.9	PREP	3279.9	0.367936	0.0615373	5.97907	2.24414e-09	8.69495e-09
ENSG00000085382.7	HACE1	1156.38	-0.333172	0.0690376	-4.82595	1.39335e-06	4.63129e-06
ENSG00000085415.11	SEH1L	12018.5	0.794661	0.0642518	12.3679	3.89833e-35	3.29983e-34
ENSG00000085433.11	WDR47	981.383	-0.372603	0.0652482	-5.71054	1.12618e-08	4.21286e-08
ENSG00000085449.10	WDFY1	2581.8	0.680598	0.0658311	10.3385	4.71687e-25	3.13221e-24
ENSG00000085465.11	OVGP1	36.0613	0.457443	0.252805	1.80947	0.0703786	0.125367
ENSG00000085491.11	SLC25A24	1704.58	-0.924336	0.074571	-12.3954	2.76844e-35	2.3519e-34
ENSG00000085511.15	MAP3K4	3568.44	1.54487	0.0595403	25.9466	1.9863e-148	7.37253e-147
ENSG00000085514.11	PILRA	20.1056	0.284081	0.339391	0.837033	0.402574	0.50783
ENSG00000085552.12	IGSF9	20.8466	-2.78687	0.424543	-6.5644	5.22431e-11	2.18652e-10
ENSG00000085563.10	ABCB1	5.29138	-1.31431	0.64648	-2.03303	0.0420496	0.0807064
ENSG00000085644.9	ZNF213	258.654	1.25561	0.166937	7.52145	5.4174e-14	2.55391e-13
ENSG00000085662.9	AKR1B1	2195.85	-8.55813	0.245734	-34.8268	9.55319e-266	9.04082e-264
ENSG00000085719.7	CPNE3	125.055	6.31204	0.408814	15.4399	8.82892e-54	1.04849e-52
ENSG00000085721.8	RRN3	3961.72	0.772138	0.062359	12.3821	3.26531e-35	2.76784e-34
ENSG00000085733.11	CTTN	147.451	-3.48081	0.183844	-18.9335	6.0373e-80	1.02038e-78
ENSG00000085741.8	WNT11	7.52252	0.846968	0.692836	1.22247	0.221531	0.311696
ENSG00000085760.10	MTIF2	7555.67	0.722785	0.06245	11.5738	5.59371e-31	4.32084e-30
ENSG00000085788.9	DDHD2	1904.97	-2.08399	0.0797041	-26.1466	1.07846e-150	4.10285e-149
ENSG00000085831.11	TTC39A	4.6048	-0.543119	0.65868	-0.824557	0.409623	0.514613
ENSG00000085832.12	EPS15	8510.55	-0.235087	0.0674652	-3.48457	0.000492935	0.00132603
ENSG00000085840.8	ORC1	4917.45	0.54438	0.0463491	11.7452	7.47293e-32	5.88887e-31
ENSG00000085871.4	MGST2	3275.28	-0.0014854	0.0582506	-0.0255001	0.979656	0.983497
ENSG00000085872.10	CHERP	1862.79	-0.298253	0.131253	-2.27236	0.023065	0.0476386
ENSG00000085978.17	ATG16L1	1860.67	1.61535	0.0540509	29.8857	3.02072e-196	1.6921e-194
ENSG00000085982.9	USP40	883.466	9.89603	0.498279	19.8604	8.9556e-88	1.69822e-86
ENSG00000085998.9	POMGNT1	2384.1	-0.991844	0.0768638	-12.9039	4.27788e-38	3.8568e-37
ENSG00000085999.7	RAD54L	2044.67	0.0660197	0.0570316	1.1576	0.247028	0.342012
ENSG00000086015.16	MAST2	1903.03	-1.72187	0.0738348	-23.3205	2.74409e-120	7.68571e-119
ENSG00000086061.11	DNAJA1	18483.7	-0.720319	0.0559847	-12.8664	6.96016e-38	6.23998e-37
ENSG00000086062.8	B4GALT1	1502.8	-0.661053	0.0572982	-11.5371	8.58004e-31	6.59585e-30
ENSG00000086065.9	CHMP5	3329.25	-0.512645	0.063191	-8.11262	4.95382e-16	2.51722e-15
ENSG00000086102.14	NFX1	6145.57	-0.600512	0.0441032	-13.6161	3.21407e-42	3.11125e-41
ENSG00000086159.8	AQP6	6.43252	-2.84805	0.740927	-3.84389	0.000121097	0.000346954
ENSG00000086189.5	DIMT1	2072.1	-0.991404	0.0614666	-16.1291	1.59231e-58	2.02514e-57
ENSG00000086200.12	IPO11	3572.45	-0.747028	0.06527	-11.4452	2.48584e-30	1.88905e-29
ENSG00000086205.12	FOLH1	1.17075	2.26873	1.18992	1.90663	0.056569	0.104203
ENSG00000086232.8	EIF2AK1	9269.72	0.0396626	0.0472462	0.839487	0.401196	0.506469
ENSG00000086288.7	NME8	19.369	3.04597	0.4588	6.63899	3.15831e-11	1.33264e-10
ENSG00000086289.7	EPDR1	2200.99	-1.04744	0.0592139	-17.689	5.0927e-70	7.61854e-69
ENSG00000086300.11	SNX10	1415.99	6.27893	0.171948	36.5163	6.10803e-292	6.71949e-290
ENSG00000086475.10	SEPHS1	3963.9	-0.849453	0.0491626	-17.2784	6.83612e-67	9.81239e-66
ENSG00000086504.11	MRPL28	1756.89	1.42509	0.148802	9.57706	9.98459e-22	6.06459e-21
ENSG00000086506.2	HBQ1	6.9951	-5.44661	1.12956	-4.82187	1.42219e-06	4.72457e-06
ENSG00000086544.2	ITPKC	546.258	-0.0791461	0.0987957	-0.801108	0.423069	0.528044
ENSG00000086548.8	CEACAM6	126.321	0.558318	0.137622	4.0569	4.97284e-05	0.000147338
ENSG00000086570.8	FAT2	3.22103	0.345361	0.839189	0.411541	0.680676	0.760657
ENSG00000086589.7	RBM22	4631.89	-0.200262	0.0502412	-3.986	6.71952e-05	0.000196926
ENSG00000086598.6	TMED2	18987.5	0.191787	0.0616047	3.11318	0.0018508	0.00466381
ENSG00000086619.9	ERO1LB	390.668	0.79805	0.116185	6.86881	6.47411e-12	2.81475e-11
ENSG00000086666.14	ZFAND6	2913.49	-0.195531	0.0734727	-2.66128	0.00778453	0.0178359
ENSG00000086696.6	HSD17B2	0.125848	0.87702	1.21671	0.720811	0.471026	NA
ENSG00000086712.8	TXLNG	3407.35	0.336038	0.056229	5.97623	2.28355e-09	8.84201e-09
ENSG00000086717.14	PPEF1	1.32375	3.49814	1.28686	2.71835	0.0065609	0.0152421
ENSG00000086730.12	LAT2	9599.35	5.05036	0.0714676	70.6664	0	0
ENSG00000086758.11	HUWE1	26295.7	0.273842	0.0470082	5.82541	5.69735e-09	2.16262e-08
ENSG00000086827.4	ZW10	3554.19	-0.259283	0.0586364	-4.42187	9.78508e-06	3.06676e-05
ENSG00000086848.10	ALG9	524.45	0.0236735	0.0775194	0.305388	0.760071	0.820752
ENSG00000086967.9	MYBPC2	1.70989	2.77372	1.14626	2.4198	0.0155289	0.0334143
ENSG00000086991.8	NOX4	1.42778	3.5904	1.28024	2.80447	0.00503993	0.0119361
ENSG00000087008.11	ACOX3	1427.68	-0.21596	0.0820349	-2.63254	0.00847488	0.0193045
ENSG00000087053.14	MTMR2	5109.29	0.00456821	0.0676529	0.0675242	0.946164	0.958622
ENSG00000087074.7	PPP1R15A	1436.72	-1.60468	0.0644661	-24.8918	9.13203e-137	3.0215e-135
ENSG00000087076.4	HSD17B14	1.35187	-0.483498	1.09738	-0.440594	0.659507	0.742469
ENSG00000087077.7	TRIP6	2723.83	3.39699	0.134192	25.3145	2.21361e-141	7.66539e-140
ENSG00000087085.9	ACHE	0.528547	2.1842	1.35972	1.60636	0.108195	0.178391
ENSG00000087086.9	FTL	141580	0.263557	0.0562476	4.68565	2.79073e-06	9.06342e-06
ENSG00000087087.14	SRRT	9858.25	0.3921	0.0862266	4.54732	5.43344e-06	1.73175e-05
ENSG00000087088.15	BAX	2009.81	-0.157637	0.10028	-1.57197	0.115957	0.188789
ENSG00000087095.8	NLK	945.781	1.25461	0.0761938	16.466	6.4363e-61	8.49041e-60
ENSG00000087111.16	PIGS	3240.79	1.31032	0.0547073	23.9515	8.90592e-127	2.69236e-125
ENSG00000087116.9	ADAMTS2	0.887478	1.12166	1.17121	0.957695	0.338217	0.441448
ENSG00000087128.5	TMPRSS11E	0.66954	2.6294	1.34633	1.95301	0.0508181	0.0947559
ENSG00000087152.11	ATXN7L3	5801.01	-0.641574	0.0654951	-9.79577	1.17405e-22	7.3223e-22
ENSG00000087157.14	PGS1	3511.17	-0.492172	0.0915394	-5.37662	7.58982e-08	2.71556e-07
ENSG00000087191.8	PSMC5	6990.09	-0.52634	0.039937	-13.1793	1.15522e-39	1.06837e-38
ENSG00000087206.12	UIMC1	2608.34	0.267465	0.0713661	3.74779	0.000178402	0.000503422
ENSG00000087237.6	CETP	5.99244	3.24032	0.762244	4.25103	2.12787e-05	6.50702e-05
ENSG00000087245.8	MMP2	2737.52	0.45447	0.0667462	6.80894	9.83223e-12	4.24568e-11
ENSG00000087250.4	MT3	10.3127	-1.38649	0.492308	-2.81631	0.0048579	0.0115391
ENSG00000087253.7	LPCAT2	14845.4	0.455527	0.0697779	6.52825	6.65441e-11	2.77211e-10
ENSG00000087258.9	GNAO1	0.653919	2.5441	1.35149	1.88244	0.0597762	0.108873
ENSG00000087263.12	OGFOD1	5387.12	0.428225	0.0609556	7.0252	2.13765e-12	9.47774e-12
ENSG00000087266.11	SH3BP2	2597.27	1.3594	0.114067	11.9175	9.58982e-33	7.71668e-32
ENSG00000087269.11	NOP14	10287.7	0.0163552	0.0427825	0.382287	0.702249	0.777095
ENSG00000087274.12	ADD1	7970.89	-0.464255	0.0463443	-10.0175	1.27659e-23	8.17429e-23
ENSG00000087299.7	L2HGDH	863.436	-0.185756	0.0836457	-2.22075	0.0263676	0.0538358
ENSG00000087301.4	TXNDC16	1297.5	1.00824	0.0787528	12.8026	1.58618e-37	1.41085e-36
ENSG00000087302.4	C14orf166	9150.6	0.164152	0.0466305	3.52026	0.000431118	0.00116705
ENSG00000087303.12	NID2	0.615381	0.528437	1.26769	0.41685	0.676788	0.757474
ENSG00000087338.4	GMCL1	4284.9	0.422336	0.0796249	5.30407	1.13247e-07	4.00998e-07
ENSG00000087365.10	SF3B2	15035.6	-0.0272986	0.0468026	-0.58327	0.559711	0.653565
ENSG00000087448.5	KLHL42	2541.48	-0.659574	0.0481717	-13.6922	1.13094e-42	1.10779e-41
ENSG00000087460.19	GNAS	40015.5	0.13283	0.0363363	3.65557	0.000256615	0.000712771
ENSG00000087470.13	DNM1L	10741.4	-0.312921	0.0510424	-6.13061	8.75404e-10	3.45457e-09
ENSG00000087494.11	PTHLH	72.1151	-7.73509	0.827525	-9.34725	8.99563e-21	5.30939e-20
ENSG00000087495.12	PHACTR3	4.16945	4.04896	1.02421	3.95326	7.70947e-05	0.000224599
ENSG00000087502.13	ERGIC2	6322.27	0.492396	0.073364	6.71169	1.92385e-11	8.20167e-11
ENSG00000087510.5	TFAP2C	1.15483	2.11997	1.24657	1.70065	0.0890096	0.152219
ENSG00000087586.13	AURKA	6356.51	-0.270714	0.0551075	-4.91247	8.99369e-07	3.023e-06
ENSG00000087589.12	CASS4	845.648	-4.46672	0.107266	-41.6414	0	0
ENSG00000087842.6	PIR	586.959	-3.74452	0.114154	-32.8022	5.47661e-236	4.18267e-234
ENSG00000087884.10	AAMDC	268.127	0.342721	0.0999811	3.42786	0.000608355	0.00162304
ENSG00000087903.8	RFX2	819.624	-2.04755	0.10895	-18.7934	8.54795e-79	1.42808e-77
ENSG00000087916.7	SLC6A14	0.264036	1.40579	1.30977	1.07331	0.283133	NA
ENSG00000087995.11	METTL2A	2651.91	-0.438177	0.0502228	-8.72466	2.6698e-18	1.46299e-17
ENSG00000088002.7	SULT2B1	0.534451	2.39365	1.35508	1.76642	0.0773247	0.135413
ENSG00000088035.11	ALG6	1333.09	1.02884	0.0926591	11.1035	1.20626e-28	8.74364e-28
ENSG00000088038.13	CNOT3	1327.19	-0.311503	0.0855536	-3.64102	0.000271559	0.000752018
ENSG00000088053.7	GP6	4.71671	-1.24693	0.692005	-1.8019	0.0715604	0.126997
ENSG00000088179.4	PTPN4	2427.43	-0.872745	0.0725552	-12.0287	2.51046e-33	2.05373e-32
ENSG00000088205.8	DDX18	17393.8	0.855719	0.0666008	12.8485	8.77079e-38	7.8471e-37
ENSG00000088247.11	KHSRP	9861.11	-0.0641131	0.0841318	-0.762056	0.446027	0.549695
ENSG00000088256.4	GNA11	146.606	-3.18742	0.224605	-14.1912	1.03857e-45	1.0772e-44
ENSG00000088280.14	ASAP3	2.57699	1.25626	0.860105	1.4606	0.144127	0.221895
ENSG00000088298.8	EDEM2	2436.23	-0.0434258	0.0532723	-0.815168	0.414976	0.520158
ENSG00000088305.14	DNMT3B	376.196	0.351546	0.0896944	3.91938	8.87762e-05	0.000257327
ENSG00000088320.3	REM1	0	NA	NA	NA	NA	NA
ENSG00000088325.11	TPX2	10548.1	-0.074741	0.0570027	-1.31118	0.189796	0.27455
ENSG00000088340.11	FER1L4	3.68699	1.02958	0.711168	1.44773	0.147693	0.226641
ENSG00000088356.4	PDRG1	1500.25	-0.641828	0.0580284	-11.0606	1.94829e-28	1.40422e-27
ENSG00000088367.16	EPB41L1	6.82099	-0.961217	0.588821	-1.63244	0.102586	0.170593
ENSG00000088386.11	SLC15A1	0.790873	1.34516	1.35154	0.995274	0.319603	0.42123
ENSG00000088387.13	DOCK9	3.78674	3.34938	0.928988	3.6054	0.000311669	0.000856787
ENSG00000088448.10	ANKRD10	3512.37	-0.359446	0.0565431	-6.35703	2.05693e-10	8.36747e-10
ENSG00000088451.6	TGDS	2004.77	0.87059	0.0689946	12.6182	1.67521e-36	1.45728e-35
ENSG00000088538.12	DOCK3	706.557	-8.60371	0.388419	-22.1506	1.0294e-108	2.52772e-107
ENSG00000088543.10	C3orf18	532.086	-8.42344	0.421633	-19.9781	8.53831e-89	1.64156e-87
ENSG00000088682.9	COQ9	2185.86	0.213243	0.0642679	3.31804	0.000906522	0.00237528
ENSG00000088726.11	TMEM40	0.125848	0.87702	1.21671	0.720811	0.471026	NA
ENSG00000088727.8	KIF9	498.451	-0.532417	0.0880631	-6.04586	1.48611e-09	5.81112e-09
ENSG00000088756.8	ARHGAP28	3.619	4.72419	1.19035	3.96876	7.2249e-05	0.000211027
ENSG00000088766.7	CRLS1	4586.62	0.278156	0.0618822	4.49492	6.95973e-06	2.20232e-05
ENSG00000088782.4	DEFB127	0	NA	NA	NA	NA	NA
ENSG00000088808.12	PPP1R13B	7.93117	1.23356	0.557673	2.21197	0.0269689	0.0549567
ENSG00000088812.13	ATRN	5077.31	0.155147	0.046091	3.36611	0.000762365	0.00201174
ENSG00000088826.13	SMOX	68.937	0.585267	0.222732	2.62767	0.00859719	0.019548
ENSG00000088827.8	SIGLEC1	0.790226	1.54138	1.30136	1.18444	0.23624	0.32929
ENSG00000088832.10	FKBP1A	7839.55	-0.364919	0.0532773	-6.84943	7.41453e-12	3.21718e-11
ENSG00000088833.13	NSFL1C	3408.92	-0.0495871	0.0491928	-1.00802	0.313447	0.414317
ENSG00000088836.8	SLC4A11	300.422	-4.83636	0.206587	-23.4108	3.31644e-121	9.33166e-120
ENSG00000088854.11	C20orf194	991.454	-0.473765	0.0701017	-6.75825	1.39664e-11	5.98926e-11
ENSG00000088876.7	ZNF343	1057.99	-0.0725582	0.0688824	-1.05336	0.292175	0.392546
ENSG00000088881.16	EBF4	0.891778	0.422927	1.27016	0.332972	0.739155	0.803721
ENSG00000088882.7	CPXM1	522.34	-2.96719	0.108039	-27.4642	4.70621e-166	2.06349e-164
ENSG00000088888.13	MAVS	2581.53	0.0910648	0.101607	0.896244	0.370123	0.474975
ENSG00000088899.10	LZTS3	76.7857	-4.40236	0.327364	-13.4479	3.16727e-41	3.00861e-40
ENSG00000088926.9	F11	0.94025	3.08481	1.31731	2.34174	0.019194	0.0405112
ENSG00000088930.6	XRN2	11135.8	-0.225558	0.0496528	-4.54271	5.55346e-06	1.76834e-05
ENSG00000088970.11	PLK1S1	893.058	1.33678	0.0770917	17.3401	2.34209e-67	3.39052e-66
ENSG00000088986.6	DYNLL1	7591.43	-0.420776	0.0429652	-9.79342	1.20156e-22	7.48926e-22
ENSG00000088992.13	TESC	2839.32	1.27947	0.0801266	15.9681	2.13326e-57	2.66421e-56
ENSG00000089006.12	SNX5	6994.1	0.532945	0.0581412	9.16639	4.89102e-20	2.82548e-19
ENSG00000089009.11	RPL6	96043.8	0.436988	0.0568697	7.68401	1.54185e-14	7.41905e-14
ENSG00000089012.10	SIRPG	11.989	-0.320808	0.473015	-0.678219	0.497633	0.597422
ENSG00000089022.9	MAPKAPK5	3346.86	-0.139219	0.0648497	-2.1468	0.0318094	0.0631657
ENSG00000089041.12	P2RX7	132.944	-2.95903	0.191217	-15.4747	5.14009e-54	6.13289e-53
ENSG00000089048.10	ESF1	4067.31	0.539544	0.0688697	7.83428	4.71539e-15	2.31053e-14
ENSG00000089050.10	RBBP9	762.833	0.505948	0.0690851	7.32355	2.41497e-13	1.10881e-12
ENSG00000089053.8	ANAPC5	20710.7	-0.157787	0.0364212	-4.3323	1.47561e-05	4.57391e-05
ENSG00000089057.10	SLC23A2	2297.63	0.363435	0.0562121	6.46541	1.01021e-10	4.17074e-10
ENSG00000089060.7	SLC8B1	2774.55	2.29298	0.0871438	26.3127	1.37393e-152	5.34708e-151
ENSG00000089063.10	TMEM230	7376.76	0.157672	0.0573305	2.75023	0.00595526	0.0139349
ENSG00000089091.12	DZANK1	166.12	0.174872	0.131536	1.32946	0.183696	0.267976
ENSG00000089094.12	KDM2B	5124.55	0.230717	0.0586952	3.93077	8.46731e-05	0.000245831
ENSG00000089101.13	C20orf26	2.80793	4.43584	1.21044	3.66464	0.00024769	0.000688737
ENSG00000089116.3	LHX5	0.123252	-0.798551	1.22265	-0.653132	0.513671	NA
ENSG00000089123.11	TASP1	1050.93	0.291202	0.0709095	4.10667	4.01399e-05	0.000120014
ENSG00000089127.8	OAS1	57.071	4.20771	0.34862	12.0696	1.5283e-33	1.25802e-32
ENSG00000089154.6	GCN1L1	19941.1	0.318507	0.0738886	4.31064	1.6278e-05	5.02573e-05
ENSG00000089157.11	RPLP0	168261	0.201421	0.0520754	3.86787	0.000109791	0.0003156
ENSG00000089159.11	PXN	275.736	-5.66773	0.291719	-19.4287	4.41019e-84	7.96631e-83
ENSG00000089163.4	SIRT4	16.1948	1.42489	0.392609	3.62928	0.000284214	0.00078521
ENSG00000089169.10	RPH3A	1.73227	2.66471	1.18686	2.24518	0.0247568	0.0508195
ENSG00000089177.13	KIF16B	346.459	-3.20377	0.120182	-26.6576	1.46229e-156	5.87092e-155
ENSG00000089195.10	TRMT6	2149.52	0.408411	0.0584483	6.98756	2.79707e-12	1.23332e-11
ENSG00000089199.5	CHGB	20.8738	-0.739133	0.325407	-2.27141	0.0231223	0.0477408
ENSG00000089220.4	PEBP1	26096.2	-0.531294	0.0388638	-13.6706	1.52042e-42	1.48547e-41
ENSG00000089225.15	TBX5	1.16741	2.24646	1.19908	1.87348	0.0610023	0.110661
ENSG00000089234.11	BRAP	2800.22	0.0882211	0.0633687	1.39219	0.163866	0.247214
ENSG00000089248.6	ERP29	12932.9	0.805028	0.0403943	19.9292	2.26974e-88	4.32016e-87
ENSG00000089250.14	NOS1	2.48889	2.22707	0.932743	2.38766	0.016956	0.0361962
ENSG00000089280.14	FUS	4497.96	0.862619	0.0735961	11.721	9.95165e-32	7.81589e-31
ENSG00000089289.11	IGBP1	3668.83	0.729228	0.0602486	12.1036	1.01029e-33	8.34094e-33
ENSG00000089327.10	FXYD5	3512.05	-0.32602	0.0769817	-4.23503	2.28521e-05	6.9693e-05
ENSG00000089335.16	ZNF302	2357.36	-0.0829134	0.0607712	-1.36435	0.172456	0.255507
ENSG00000089351.10	GRAMD1A	2126.83	-0.691908	0.118515	-5.83817	5.27783e-09	2.00763e-08
ENSG00000089356.12	FXYD3	0.856658	0.436121	1.20847	0.360887	0.718184	0.788202
ENSG00000089472.12	HEPH	5.52015	-0.624337	0.639507	-0.976278	0.328927	0.431375
ENSG00000089486.12	CDIP1	1737.24	-0.462379	0.101197	-4.56912	4.89776e-06	1.5661e-05
ENSG00000089505.13	CMTM1	56.5778	1.88598	0.22654	8.32515	8.42217e-17	4.39166e-16
ENSG00000089558.4	KCNH4	21.9222	0.40685	0.299467	1.35858	0.174279	0.257856
ENSG00000089597.12	GANAB	23206.2	-0.354942	0.0396054	-8.96196	3.1896e-19	1.79728e-18
ENSG00000089639.6	GMIP	3593.13	0.298204	0.0916106	3.25512	0.00113343	0.0029365
ENSG00000089682.12	RBM41	885.34	0.51517	0.0671713	7.6695	1.72673e-14	8.29422e-14
ENSG00000089685.10	BIRC5	10664.8	-1.30048	0.0438595	-29.6511	3.28608e-193	1.80427e-191
ENSG00000089692.4	LAG3	2.371	-2.92553	1.16369	-2.51401	0.0119368	0.026374
ENSG00000089693.6	MLF2	3012.38	-0.729743	0.0757195	-9.63745	5.55524e-22	3.39793e-21
ENSG00000089723.5	OTUB2	93.5639	-0.141404	0.154939	-0.912642	0.361431	0.466137
ENSG00000089737.11	DDX24	10790.3	0.197165	0.0528093	3.73353	0.000188816	0.000531577
ENSG00000089775.7	ZBTB25	980.545	-0.406663	0.0723759	-5.61876	1.92338e-08	7.11819e-08
ENSG00000089818.12	NECAP1	1752.66	-0.113854	0.061258	-1.8586	0.0630835	0.113923
ENSG00000089820.11	ARHGAP4	4748.64	1.00793	0.167433	6.01993	1.74491e-09	6.8013e-09
ENSG00000089847.8	ANKRD24	17.7103	3.96087	0.583181	6.79184	1.10715e-11	4.76865e-11
ENSG00000089876.7	DHX32	2393.04	0.86628	0.0542205	15.977	1.84892e-57	2.3148e-56
ENSG00000089902.8	RCOR1	7962.84	0.453113	0.0542005	8.35994	6.27481e-17	3.29222e-16
ENSG00000089916.13	GPATCH2L	6551.17	-0.735542	0.0602773	-12.2027	3.00866e-34	2.50637e-33
ENSG00000090006.13	LTBP4	229.718	-6.32203	0.329171	-19.2059	3.3007e-82	5.80728e-81
ENSG00000090013.5	BLVRB	183.471	0.00773747	0.170308	0.0454321	0.963763	0.970515
ENSG00000090020.6	SLC9A1	396.309	-1.13293	0.142741	-7.93698	2.0717e-15	1.0287e-14
ENSG00000090054.9	SPTLC1	4833.95	-0.0826572	0.0551257	-1.49943	0.133762	0.210859
ENSG00000090060.13	PAPOLA	13195.7	0.166857	0.0654418	2.5497	0.0107816	0.0239991
ENSG00000090061.13	CCNK	898.051	0.0225451	0.102131	0.220747	0.825289	0.877374
ENSG00000090097.16	PCBP4	117.462	-4.44207	0.269032	-16.5113	3.04214e-61	4.04111e-60
ENSG00000090104.7	RGS1	70.6354	-0.645509	0.190207	-3.39373	0.000689488	0.00182925
ENSG00000090238.7	YPEL3	67.5015	-4.92561	0.411013	-11.9841	4.30669e-33	3.50154e-32
ENSG00000090263.11	MRPS33	2259.98	1.3571	0.068829	19.7169	1.54323e-86	2.88154e-85
ENSG00000090266.8	NDUFB2	3199.83	0.486264	0.0503586	9.65602	4.63515e-22	2.84256e-21
ENSG00000090273.9	NUDC	6682.51	-0.0687857	0.0676852	-1.01626	0.309506	0.410212
ENSG00000090316.11	MAEA	3252.16	0.417324	0.0986227	4.23152	2.32117e-05	7.07331e-05
ENSG00000090339.4	ICAM1	1058.64	-7.18195	0.223901	-32.0765	9.38727e-226	6.57605e-224
ENSG00000090372.10	STRN4	3096.5	-0.726401	0.125275	-5.79845	6.69316e-09	2.5299e-08
ENSG00000090376.4	IRAK3	8415.2	-0.0625647	0.0556346	-1.12456	0.260774	0.357277
ENSG00000090382.2	LYZ	16609.6	3.76958	0.0572159	65.8834	0	0
ENSG00000090402.3	SI	1.02922	1.98477	1.25106	1.58647	0.112632	0.184162
ENSG00000090432.5	MUL1	1562.16	-0.0357223	0.0725465	-0.492406	0.622432	0.709884
ENSG00000090447.7	TFAP4	1497.34	1.28674	0.114975	11.1915	4.48712e-29	3.29405e-28
ENSG00000090470.10	PDCD7	3022.1	-0.264276	0.0524582	-5.03784	4.70819e-07	1.61006e-06
ENSG00000090487.6	SPG21	5500.35	-0.000788635	0.0512136	-0.0153989	0.987714	0.990023
ENSG00000090512.7	FETUB	0.267373	1.4139	1.31098	1.07851	0.280806	NA
ENSG00000090520.6	DNAJB11	6083.67	-0.331442	0.0554113	-5.98149	2.21104e-09	8.56996e-09
ENSG00000090530.5	LEPREL1	0.498491	0.113744	1.33784	0.0850209	0.932245	0.951415
ENSG00000090534.13	THPO	0.87728	-0.188804	1.2418	-0.15204	0.879155	0.918049
ENSG00000090539.11	CHRD	2.16948	0.905768	0.917615	0.98709	0.323599	0.425521
ENSG00000090554.8	FLT3LG	5.54665	-1.40571	0.618789	-2.27171	0.023104	0.0477095
ENSG00000090565.11	RAB11FIP3	340.37	-1.59111	0.103388	-15.3897	1.91969e-53	2.2674e-52
ENSG00000090581.5	GNPTG	1124.67	1.37043	0.10106	13.5605	6.86351e-42	6.60201e-41
ENSG00000090612.16	ZNF268	2993.75	0.378904	0.0694246	5.45777	4.82146e-08	1.74432e-07
ENSG00000090615.8	GOLGA3	9929.38	0.0857998	0.0666174	1.28795	0.197764	0.283678
ENSG00000090621.9	PABPC4	10871.1	-0.416263	0.0375028	-11.0995	1.26133e-28	9.13849e-28
ENSG00000090659.13	CD209	0.666735	2.69195	1.34145	2.00674	0.0447769	0.0850943
ENSG00000090661.7	CERS4	696.69	-7.5223	0.27917	-26.9452	6.48804e-160	2.679e-158
ENSG00000090674.11	MCOLN1	351.321	-0.212197	0.142463	-1.48949	0.136359	0.214356
ENSG00000090686.11	USP48	5718.92	0.140125	0.059028	2.37387	0.0176026	0.0374559
ENSG00000090776.5	EFNB1	352.437	1.74045	0.1448	12.0197	2.79944e-33	2.28706e-32
ENSG00000090857.9	PDPR	4194.76	1.15034	0.0446545	25.7608	2.43921e-146	8.86992e-145
ENSG00000090861.11	AARS	11629.8	-0.321382	0.0422466	-7.60731	2.79869e-14	1.33278e-13
ENSG00000090863.7	GLG1	7422.75	0.0594276	0.0442061	1.34433	0.178842	0.26193
ENSG00000090889.10	KIF4A	3692.77	-0.0457392	0.0617485	-0.740734	0.458855	0.561666
ENSG00000090905.13	TNRC6A	3202.86	1.43663	0.0599984	23.9445	1.05522e-126	3.17745e-125
ENSG00000090920.9	FCGBP	13.059	-2.36651	0.502651	-4.70806	2.50083e-06	8.15756e-06
ENSG00000090924.10	PLEKHG2	267.955	-5.21392	0.229067	-22.7616	1.10251e-114	2.92655e-113
ENSG00000090932.6	DLL3	128.594	-7.73605	0.647032	-11.9562	6.02491e-33	4.87124e-32
ENSG00000090971.4	NAT14	959.997	-4.94377	0.140719	-35.1322	2.17754e-270	2.13364e-268
ENSG00000090975.8	PITPNM2	467.855	-4.16343	0.139563	-29.8319	1.50921e-195	8.39238e-194
ENSG00000090989.13	EXOC1	3524.67	0.0474677	0.0551093	0.861337	0.389053	0.494519
ENSG00000091009.6	RBM27	9248.75	0.0338281	0.0532657	0.635083	0.525375	0.623092
ENSG00000091010.4	POU4F3	0.980769	-0.437517	1.10473	-0.396041	0.692075	0.769553
ENSG00000091039.12	OSBPL8	14572.2	1.08673	0.0864048	12.5772	2.81704e-36	2.43666e-35
ENSG00000091073.15	DTX2	287.487	-0.438319	0.166723	-2.62903	0.00856294	0.0194832
ENSG00000091106.14	NLRC4	195.639	-1.51902	0.117406	-12.9382	2.74079e-38	2.4776e-37
ENSG00000091127.9	PUS7	5972.07	0.406078	0.0623556	6.51229	7.40143e-11	3.0749e-10
ENSG00000091128.8	LAMB4	1.18315	1.38881	1.25172	1.10952	0.267204	0.364595
ENSG00000091129.15	NRCAM	40.1713	-3.37459	0.336515	-10.028	1.14762e-23	7.35929e-23
ENSG00000091136.9	LAMB1	796.461	-8.57641	0.460655	-18.6178	2.30279e-77	3.77884e-76
ENSG00000091137.7	SLC26A4	5.64294	1.19436	0.631868	1.8902	0.0587314	0.107491
ENSG00000091138.8	SLC26A3	0.389884	1.99382	1.35848	1.46768	0.142192	0.219261
ENSG00000091140.8	DLD	8164.74	-0.138216	0.057407	-2.40765	0.0160557	0.0344383
ENSG00000091157.9	WDR7	2409.01	1.20457	0.0645764	18.6533	1.18612e-77	1.9506e-76
ENSG00000091164.8	TXNL1	5802.98	0.434183	0.052076	8.3375	7.58799e-17	3.96551e-16
ENSG00000091181.15	IL5RA	898.877	-8.22111	0.31291	-26.2731	3.89581e-152	1.50656e-150
ENSG00000091262.10	ABCC6	31.1417	-0.762762	0.296336	-2.57398	0.0100536	0.0225019
ENSG00000091317.7	CMTM6	10451.6	0.233996	0.0742593	3.15107	0.00162675	0.00413617
ENSG00000091409.10	ITGA6	4478.03	2.20063	0.0648654	33.9261	2.74668e-252	2.35774e-250
ENSG00000091428.13	RAPGEF4	244.652	-0.203236	0.103416	-1.96522	0.0493883	0.0924953
ENSG00000091436.12	MLTK	6601.1	-0.897995	0.069482	-12.9241	3.28949e-38	2.97186e-37
ENSG00000091482.5	SMPX	0.138426	0.907324	1.21929	0.744142	0.45679	NA
[truncated: 55,310 more rows]
