# Supplementary material for: Aging Human Hematopoietic Stem Cells Manifest Profound Epigenetic Reprogramming of Enhancers That May Predispose to Leukemia
Source: Oxford University Press journal article supplement (doi:10.1158/2159-8290.cd-18-1474), 2019-05-13
Supplement: 21598290cd181474-sup-213895_2_supp_5514130_prpmp3.xlsx [file 21598290cd181474-sup-213895_2_supp_5514130_prpmp3.xlsx]

## Sheet: Description
Reported are the significant (FDR<0.05) GSEA results for the Wald statistic ranked list of Aged HSCe gene expression compared to Young HSCe"Yng vs Aged HSCe"
and the results for the Wald statistic ranked list of CD34+ tranfected with sgCTRL or sgKLF6 "Ctrl vs sgKLF6"
A weighted enrichment score was used with genesets of 15-500 genes.
Included are the results for the c2 curated symbols (version 6.0) gene sets

## Sheet: Yng vs Aged HSCe
Compared_Groups	NAME	SIZE	ES	NES	NOM p-val	FDR q-val	FWER p-val	RANK AT MAX	LEADING EDGE
YoungHSCe_vs_AgedHSCe	PICCALUGA_ANGIOIMMUNOBLASTIC_LYMPHOMA_DN	129	-0.740352	-3.40017	0	0	0	3187	tags=65%, list=11%, signal=73%
YoungHSCe_vs_AgedHSCe	HSIAO_HOUSEKEEPING_GENES	381	-0.606292	-3.22833	0	0	0	3448	tags=49%, list=12%, signal=54%
YoungHSCe_vs_AgedHSCe	BILANGES_SERUM_AND_RAPAMYCIN_SENSITIVE_GENES	65	-0.745375	-2.99654	0	0	0	3832	tags=74%, list=13%, signal=85%
YoungHSCe_vs_AgedHSCe	REACTOME_TRANSLATION	162	-0.595077	-2.85595	0	0	0	3679	tags=49%, list=12%, signal=55%
YoungHSCe_vs_AgedHSCe	KEGG_RIBOSOME	86	-0.66613	-2.83973	0	0	0	3679	tags=58%, list=12%, signal=66%
YoungHSCe_vs_AgedHSCe	ZWANG_CLASS_3_TRANSIENTLY_INDUCED_BY_EGF	198	-0.569599	-2.81493	0	0	0	3237	tags=42%, list=11%, signal=47%
YoungHSCe_vs_AgedHSCe	REACTOME_SRP_DEPENDENT_COTRANSLATIONAL_PROTEIN_TARGETING_TO_MEMBRANE	124	-0.614811	-2.79177	0	0	0	3679	tags=52%, list=12%, signal=59%
YoungHSCe_vs_AgedHSCe	REACTOME_METABOLISM_OF_MRNA	224	-0.554064	-2.7616	0	0	0	3679	tags=46%, list=12%, signal=52%
YoungHSCe_vs_AgedHSCe	REACTOME_PEPTIDE_CHAIN_ELONGATION	100	-0.603529	-2.68132	0	0	0	6930	tags=65%, list=23%, signal=84%
YoungHSCe_vs_AgedHSCe	KEGG_SPLICEOSOME	125	-0.580272	-2.66513	0	0	0	3114	tags=49%, list=10%, signal=54%
YoungHSCe_vs_AgedHSCe	REACTOME_ER_PHAGOSOME_PATHWAY	59	-0.669115	-2.65796	0	0	0	3434	tags=51%, list=12%, signal=57%
YoungHSCe_vs_AgedHSCe	KEGG_PROTEASOME	45	-0.707682	-2.65678	0	0	0	2192	tags=51%, list=7%, signal=55%
YoungHSCe_vs_AgedHSCe	REACTOME_DOWNSTREAM_SIGNALING_EVENTS_OF_B_CELL_RECEPTOR_BCR	92	-0.609551	-2.65313	0	0	0	3616	tags=48%, list=12%, signal=54%
YoungHSCe_vs_AgedHSCe	REACTOME_METABOLISM_OF_RNA	269	-0.521251	-2.65291	0	0	0	3679	tags=43%, list=12%, signal=49%
YoungHSCe_vs_AgedHSCe	REACTOME_MRNA_SPLICING	106	-0.594833	-2.65288	0	0	0	3494	tags=48%, list=12%, signal=54%
YoungHSCe_vs_AgedHSCe	REACTOME_3_UTR_MEDIATED_TRANSLATIONAL_REGULATION	121	-0.585827	-2.65215	0	0	0	3679	tags=49%, list=12%, signal=55%
YoungHSCe_vs_AgedHSCe	TIEN_INTESTINE_PROBIOTICS_24HR_DN	205	-0.541906	-2.64257	0	0	0	3477	tags=45%, list=12%, signal=50%
YoungHSCe_vs_AgedHSCe	REACTOME_P53_INDEPENDENT_G1_S_DNA_DAMAGE_CHECKPOINT	48	-0.683759	-2.6267	0	0	0	3434	tags=54%, list=12%, signal=61%
YoungHSCe_vs_AgedHSCe	NAGASHIMA_NRG1_SIGNALING_UP	161	-0.544267	-2.61056	0	0	0	3449	tags=41%, list=12%, signal=46%
YoungHSCe_vs_AgedHSCe	REACTOME_ACTIVATION_OF_NF_KAPPAB_IN_B_CELLS	61	-0.647059	-2.60315	0	0	0	3616	tags=56%, list=12%, signal=63%
YoungHSCe_vs_AgedHSCe	REACTOME_REGULATION_OF_ORNITHINE_DECARBOXYLASE_ODC	48	-0.67256	-2.59863	0	0	0	3434	tags=54%, list=12%, signal=61%
YoungHSCe_vs_AgedHSCe	REACTOME_INFLUENZA_VIRAL_RNA_TRANSCRIPTION_AND_REPLICATION	116	-0.576782	-2.59215	0	0	0	3679	tags=48%, list=12%, signal=55%
YoungHSCe_vs_AgedHSCe	REACTOME_FORMATION_OF_THE_TERNARY_COMPLEX_AND_SUBSEQUENTLY_THE_43S_COMPLEX	53	-0.668128	-2.58953	0	0	0	3585	tags=53%, list=12%, signal=60%
YoungHSCe_vs_AgedHSCe	RHEIN_ALL_GLUCOCORTICOID_THERAPY_UP	65	-0.628693	-2.58441	0	0	0	3907	tags=48%, list=13%, signal=55%
YoungHSCe_vs_AgedHSCe	REACTOME_PROCESSING_OF_CAPPED_INTRON_CONTAINING_PRE_MRNA	135	-0.550529	-2.57617	0	0	0	3494	tags=46%, list=12%, signal=52%
YoungHSCe_vs_AgedHSCe	MILI_PSEUDOPODIA_HAPTOTAXIS_UP	498	-0.469525	-2.56957	0	0	0	3742	tags=38%, list=13%, signal=43%
YoungHSCe_vs_AgedHSCe	REACTOME_ACTIVATION_OF_THE_MRNA_UPON_BINDING_OF_THE_CAP_BINDING_COMPLEX_AND_EIFS_AND_SUBSEQUENT_BINDING_TO_43S	61	-0.645044	-2.5651	0	0	0	3585	tags=52%, list=12%, signal=60%
YoungHSCe_vs_AgedHSCe	GUTIERREZ_MULTIPLE_MYELOMA_UP	32	-0.734428	-2.56367	0	0	0	1852	tags=50%, list=6%, signal=53%
YoungHSCe_vs_AgedHSCe	REACTOME_P53_DEPENDENT_G1_DNA_DAMAGE_RESPONSE	54	-0.641467	-2.55982	0	0	0	3434	tags=52%, list=12%, signal=58%
YoungHSCe_vs_AgedHSCe	RASHI_RESPONSE_TO_IONIZING_RADIATION_2	117	-0.554485	-2.55882	0	0	0	3028	tags=37%, list=10%, signal=41%
YoungHSCe_vs_AgedHSCe	REACTOME_CROSS_PRESENTATION_OF_SOLUBLE_EXOGENOUS_ANTIGENS_ENDOSOMES	43	-0.679335	-2.55145	0	0	0	2192	tags=49%, list=7%, signal=53%
YoungHSCe_vs_AgedHSCe	REACTOME_AUTODEGRADATION_OF_THE_E3_UBIQUITIN_LIGASE_COP1	48	-0.664004	-2.53258	0	0	0	3434	tags=54%, list=12%, signal=61%
YoungHSCe_vs_AgedHSCe	REACTOME_REGULATION_OF_APOPTOSIS	54	-0.646052	-2.53074	0	0	0	3638	tags=50%, list=12%, signal=57%
YoungHSCe_vs_AgedHSCe	ENK_UV_RESPONSE_EPIDERMIS_DN	452	-0.467078	-2.53032	0	0	0	3449	tags=33%, list=12%, signal=37%
YoungHSCe_vs_AgedHSCe	FLOTHO_PEDIATRIC_ALL_THERAPY_RESPONSE_UP	52	-0.658384	-2.52383	0	0	0	3585	tags=56%, list=12%, signal=63%
YoungHSCe_vs_AgedHSCe	REACTOME_MRNA_PROCESSING	153	-0.526497	-2.5141	0	0	0	3494	tags=43%, list=12%, signal=49%
YoungHSCe_vs_AgedHSCe	REACTOME_VIF_MEDIATED_DEGRADATION_OF_APOBEC3G	49	-0.660301	-2.50147	0	0	0	3434	tags=53%, list=12%, signal=60%
YoungHSCe_vs_AgedHSCe	REACTOME_CDK_MEDIATED_PHOSPHORYLATION_AND_REMOVAL_OF_CDC6	46	-0.676892	-2.49665	0	0	0	3434	tags=54%, list=12%, signal=61%
YoungHSCe_vs_AgedHSCe	SCIAN_INVERSED_TARGETS_OF_TP53_AND_TP73_DN	30	-0.723957	-2.49601	0	0	0	2950	tags=53%, list=10%, signal=59%
YoungHSCe_vs_AgedHSCe	REACTOME_SIGNALING_BY_WNT	62	-0.623043	-2.48871	0	0	0	3434	tags=52%, list=12%, signal=58%
YoungHSCe_vs_AgedHSCe	SESTO_RESPONSE_TO_UV_C0	102	-0.557651	-2.4808	0	0	0	3701	tags=48%, list=12%, signal=55%
YoungHSCe_vs_AgedHSCe	BLUM_RESPONSE_TO_SALIRASIB_UP	229	-0.492236	-2.47633	0	0	0	3211	tags=40%, list=11%, signal=44%
YoungHSCe_vs_AgedHSCe	REACTOME_REGULATION_OF_MRNA_STABILITY_BY_PROTEINS_THAT_BIND_AU_RICH_ELEMENTS	81	-0.588621	-2.47489	0	0	0	2801	tags=42%, list=9%, signal=46%
YoungHSCe_vs_AgedHSCe	REACTOME_ANTIGEN_PROCESSING_CROSS_PRESENTATION	69	-0.60668	-2.46961	0	0	0	3434	tags=45%, list=12%, signal=51%
YoungHSCe_vs_AgedHSCe	CHAUHAN_RESPONSE_TO_METHOXYESTRADIOL_DN	96	-0.560694	-2.46179	0	0	0	3478	tags=44%, list=12%, signal=49%
YoungHSCe_vs_AgedHSCe	ROME_INSULIN_TARGETS_IN_MUSCLE_UP	407	-0.460164	-2.45842	0	0	0	3508	tags=33%, list=12%, signal=37%
YoungHSCe_vs_AgedHSCe	BIOCARTA_PROTEASOME_PATHWAY	28	-0.740855	-2.44964	0	0	0	3311	tags=61%, list=11%, signal=68%
YoungHSCe_vs_AgedHSCe	REACTOME_NONSENSE_MEDIATED_DECAY_ENHANCED_BY_THE_EXON_JUNCTION_COMPLEX	121	-0.536863	-2.44861	0	0	0	3679	tags=46%, list=12%, signal=53%
YoungHSCe_vs_AgedHSCe	REACTOME_RESPIRATORY_ELECTRON_TRANSPORT_ATP_SYNTHESIS_BY_CHEMIOSMOTIC_COUPLING_AND_HEAT_PRODUCTION_BY_UNCOUPLING_PROTEINS_	80	-0.576836	-2.44786	0	0	0	3543	tags=38%, list=12%, signal=42%
YoungHSCe_vs_AgedHSCe	MENSE_HYPOXIA_UP	92	-0.560002	-2.44655	0	0	0	2971	tags=37%, list=10%, signal=41%
YoungHSCe_vs_AgedHSCe	DEURIG_T_CELL_PROLYMPHOCYTIC_LEUKEMIA_DN	286	-0.468941	-2.43567	0	0	0	2786	tags=30%, list=9%, signal=32%
YoungHSCe_vs_AgedHSCe	REACTOME_DESTABILIZATION_OF_MRNA_BY_AUF1_HNRNP_D0	50	-0.630505	-2.43315	0	0	0	3434	tags=52%, list=12%, signal=59%
YoungHSCe_vs_AgedHSCe	TIEN_INTESTINE_PROBIOTICS_6HR_UP	53	-0.622237	-2.42293	0	0	0	3448	tags=57%, list=12%, signal=64%
YoungHSCe_vs_AgedHSCe	TAKAO_RESPONSE_TO_UVB_RADIATION_UP	83	-0.560866	-2.42153	0	0	0	3760	tags=49%, list=13%, signal=56%
YoungHSCe_vs_AgedHSCe	MITSIADES_RESPONSE_TO_APLIDIN_UP	413	-0.451425	-2.42076	0	0	0	2958	tags=33%, list=10%, signal=37%
YoungHSCe_vs_AgedHSCe	REACTOME_SCFSKP2_MEDIATED_DEGRADATION_OF_P27_P21	53	-0.604132	-2.41522	0	0	0	3434	tags=49%, list=12%, signal=55%
YoungHSCe_vs_AgedHSCe	BIDUS_METASTASIS_UP	207	-0.489144	-2.41304	0	0	0	3226	tags=35%, list=11%, signal=39%
YoungHSCe_vs_AgedHSCe	REACTOME_HOST_INTERACTIONS_OF_HIV_FACTORS	120	-0.534998	-2.41137	0	0	0	3434	tags=43%, list=12%, signal=49%
YoungHSCe_vs_AgedHSCe	REACTOME_SCF_BETA_TRCP_MEDIATED_DEGRADATION_OF_EMI1	49	-0.626682	-2.40808	0	0	0	3434	tags=53%, list=12%, signal=60%
YoungHSCe_vs_AgedHSCe	PYEON_CANCER_HEAD_AND_NECK_VS_CERVICAL_DN	17	-0.836616	-2.40766	0	0	0	379	tags=41%, list=1%, signal=42%
YoungHSCe_vs_AgedHSCe	AMIT_EGF_RESPONSE_60_HELA	43	-0.649819	-2.40013	0	0	0	2784	tags=44%, list=9%, signal=49%
YoungHSCe_vs_AgedHSCe	LINDSTEDT_DENDRITIC_CELL_MATURATION_B	50	-0.628805	-2.3996	0	0	0	2689	tags=42%, list=9%, signal=46%
YoungHSCe_vs_AgedHSCe	CHEN_HOXA5_TARGETS_9HR_UP	208	-0.479799	-2.39585	0	0	0	2211	tags=35%, list=7%, signal=38%
YoungHSCe_vs_AgedHSCe	DORN_ADENOVIRUS_INFECTION_48HR_DN	33	-0.680215	-2.39289	0	0	0	2252	tags=48%, list=8%, signal=52%
YoungHSCe_vs_AgedHSCe	HOSHIDA_LIVER_CANCER_SUBCLASS_S2	108	-0.534966	-2.39124	0	0	0	3657	tags=42%, list=12%, signal=47%
YoungHSCe_vs_AgedHSCe	YAGI_AML_WITH_INV_16_TRANSLOCATION	372	-0.448611	-2.37735	0	0	0	3650	tags=34%, list=12%, signal=38%
YoungHSCe_vs_AgedHSCe	OSMAN_BLADDER_CANCER_DN	364	-0.448356	-2.37239	0	0	0	3477	tags=38%, list=12%, signal=42%
YoungHSCe_vs_AgedHSCe	REACTOME_HIV_INFECTION	187	-0.482749	-2.35962	0	0	0	3494	tags=40%, list=12%, signal=45%
YoungHSCe_vs_AgedHSCe	WANG_TUMOR_INVASIVENESS_UP	352	-0.44392	-2.35925	0	0	0	3475	tags=36%, list=12%, signal=41%
YoungHSCe_vs_AgedHSCe	DORN_ADENOVIRUS_INFECTION_32HR_DN	34	-0.668614	-2.35651	0	0	0	2252	tags=47%, list=8%, signal=51%
YoungHSCe_vs_AgedHSCe	REACTOME_INFLUENZA_LIFE_CYCLE	150	-0.503913	-2.35581	0	0	0	3679	tags=43%, list=12%, signal=49%
YoungHSCe_vs_AgedHSCe	REACTOME_SIGNALING_BY_THE_B_CELL_RECEPTOR_BCR	121	-0.510632	-2.35148	0	0	0	3616	tags=38%, list=12%, signal=43%
YoungHSCe_vs_AgedHSCe	REACTOME_RESPIRATORY_ELECTRON_TRANSPORT	65	-0.581113	-2.34645	0	1.59447e-05	0.001	3543	tags=38%, list=12%, signal=44%
YoungHSCe_vs_AgedHSCe	CHNG_MULTIPLE_MYELOMA_HYPERPLOID_UP	49	-0.610508	-2.34136	0	1.57292e-05	0.001	3679	tags=63%, list=12%, signal=72%
YoungHSCe_vs_AgedHSCe	SESTO_RESPONSE_TO_UV_C1	65	-0.581023	-2.33825	0	1.55195e-05	0.001	3335	tags=46%, list=11%, signal=52%
YoungHSCe_vs_AgedHSCe	BROCKE_APOPTOSIS_REVERSED_BY_IL6	137	-0.501072	-2.32934	0	1.53153e-05	0.001	2850	tags=34%, list=10%, signal=38%
YoungHSCe_vs_AgedHSCe	BORCZUK_MALIGNANT_MESOTHELIOMA_UP	294	-0.455438	-2.32898	0	1.51164e-05	0.001	3692	tags=34%, list=12%, signal=38%
YoungHSCe_vs_AgedHSCe	DAZARD_RESPONSE_TO_UV_SCC_DN	116	-0.513977	-2.32609	0	1.49226e-05	0.001	2671	tags=36%, list=9%, signal=40%
YoungHSCe_vs_AgedHSCe	JISON_SICKLE_CELL_DISEASE_DN	170	-0.483378	-2.32261	0	1.47337e-05	0.001	3637	tags=41%, list=12%, signal=46%
YoungHSCe_vs_AgedHSCe	GENTILE_UV_HIGH_DOSE_DN	296	-0.451037	-2.32253	0	1.45495e-05	0.001	3701	tags=36%, list=12%, signal=41%
YoungHSCe_vs_AgedHSCe	LEE_LIVER_CANCER_SURVIVAL_DN	163	-0.488755	-2.31638	0	1.43699e-05	0.001	3447	tags=38%, list=12%, signal=43%
YoungHSCe_vs_AgedHSCe	NGO_MALIGNANT_GLIOMA_1P_LOH	15	-0.82158	-2.31184	0	1.41946e-05	0.001	3334	tags=73%, list=11%, signal=83%
YoungHSCe_vs_AgedHSCe	ENK_UV_RESPONSE_KERATINOCYTE_UP	480	-0.421396	-2.3101	0	1.40236e-05	0.001	3811	tags=35%, list=13%, signal=40%
YoungHSCe_vs_AgedHSCe	KIM_WT1_TARGETS_UP	199	-0.465419	-2.30035	0	2.82957e-05	0.002	3519	tags=34%, list=12%, signal=38%
YoungHSCe_vs_AgedHSCe	GARGALOVIC_RESPONSE_TO_OXIDIZED_PHOSPHOLIPIDS_BLUE_UP	120	-0.496568	-2.29865	0	2.79629e-05	0.002	3780	tags=41%, list=13%, signal=47%
YoungHSCe_vs_AgedHSCe	SCHLOSSER_MYC_TARGETS_REPRESSED_BY_SERUM	155	-0.47965	-2.28596	0	4.10946e-05	0.003	3496	tags=36%, list=12%, signal=41%
YoungHSCe_vs_AgedHSCe	CAFFAREL_RESPONSE_TO_THC_UP	32	-0.655981	-2.28308	0	4.06222e-05	0.003	3413	tags=53%, list=11%, signal=60%
YoungHSCe_vs_AgedHSCe	YAMASHITA_LIVER_CANCER_WITH_EPCAM_UP	50	-0.587119	-2.28154	0	4.01606e-05	0.003	3417	tags=40%, list=11%, signal=45%
YoungHSCe_vs_AgedHSCe	PENG_GLUTAMINE_DEPRIVATION_DN	326	-0.428599	-2.27028	0	5.28426e-05	0.004	2631	tags=29%, list=9%, signal=31%
YoungHSCe_vs_AgedHSCe	REACTOME_AUTODEGRADATION_OF_CDH1_BY_CDH1_APC_C	56	-0.565405	-2.26232	0	7.80658e-05	0.006	3434	tags=48%, list=12%, signal=54%
YoungHSCe_vs_AgedHSCe	REACTOME_TCA_CYCLE_AND_RESPIRATORY_ELECTRON_TRANSPORT	117	-0.498539	-2.26169	0	7.72079e-05	0.006	3543	tags=33%, list=12%, signal=38%
YoungHSCe_vs_AgedHSCe	JIANG_AGING_CEREBRAL_CORTEX_DN	50	-0.5805	-2.26119	0	7.63687e-05	0.006	4104	tags=52%, list=14%, signal=60%
YoungHSCe_vs_AgedHSCe	TIAN_TNF_SIGNALING_VIA_NFKB	24	-0.705081	-2.25685	0	0.000101006	0.008	4310	tags=58%, list=14%, signal=68%
YoungHSCe_vs_AgedHSCe	HASLINGER_B_CLL_WITH_CHROMOSOME_12_TRISOMY	23	-0.694325	-2.25475	0	9.99311e-05	0.008	3437	tags=48%, list=12%, signal=54%
YoungHSCe_vs_AgedHSCe	CASORELLI_ACUTE_PROMYELOCYTIC_LEUKEMIA_UP	157	-0.475404	-2.24946	0	9.88792e-05	0.008	2452	tags=31%, list=8%, signal=33%
YoungHSCe_vs_AgedHSCe	KAAB_FAILED_HEART_ATRIUM_DN	132	-0.487387	-2.24898	0	9.78492e-05	0.008	3330	tags=35%, list=11%, signal=39%
YoungHSCe_vs_AgedHSCe	VALK_AML_CLUSTER_10	32	-0.637803	-2.2422	0	0.000120782	0.009	3389	tags=47%, list=11%, signal=53%
YoungHSCe_vs_AgedHSCe	PELLICCIOTTA_HDAC_IN_ANTIGEN_PRESENTATION_DN	49	-0.597758	-2.24185	0	0.000119549	0.009	3478	tags=41%, list=12%, signal=46%
YoungHSCe_vs_AgedHSCe	GARY_CD5_TARGETS_UP	449	-0.412778	-2.24151	0	0.000118342	0.009	3713	tags=32%, list=12%, signal=36%
YoungHSCe_vs_AgedHSCe	COLIN_PILOCYTIC_ASTROCYTOMA_VS_GLIOBLASTOMA_DN	24	-0.69861	-2.24068	0	0.000117158	0.009	2454	tags=42%, list=8%, signal=45%
YoungHSCe_vs_AgedHSCe	BENPORATH_ES_CORE_NINE_CORRELATED	91	-0.518618	-2.24028	0	0.000115998	0.009	3176	tags=38%, list=11%, signal=43%
YoungHSCe_vs_AgedHSCe	WANG_TUMOR_INVASIVENESS_DN	203	-0.460356	-2.23933	0	0.000126351	0.01	3383	tags=35%, list=11%, signal=39%
YoungHSCe_vs_AgedHSCe	KIM_WT1_TARGETS_8HR_UP	157	-0.469101	-2.23772	0	0.000125124	0.01	3895	tags=38%, list=13%, signal=43%
YoungHSCe_vs_AgedHSCe	GINESTIER_BREAST_CANCER_20Q13_AMPLIFICATION_DN	161	-0.467209	-2.23727	0	0.000123921	0.01	2689	tags=36%, list=9%, signal=39%
YoungHSCe_vs_AgedHSCe	KIM_ALL_DISORDERS_CALB1_CORR_UP	490	-0.409179	-2.23451	0	0.00013426	0.011	3437	tags=32%, list=12%, signal=36%
YoungHSCe_vs_AgedHSCe	REACTOME_CDT1_ASSOCIATION_WITH_THE_CDC6_ORC_ORIGIN_COMPLEX	54	-0.561002	-2.23067	0	0.000132994	0.011	3434	tags=46%, list=12%, signal=52%
YoungHSCe_vs_AgedHSCe	SPIELMAN_LYMPHOBLAST_EUROPEAN_VS_ASIAN_UP	469	-0.412075	-2.23029	0	0.000131751	0.011	3622	tags=33%, list=12%, signal=37%
YoungHSCe_vs_AgedHSCe	REACTOME_CYCLIN_E_ASSOCIATED_EVENTS_DURING_G1_S_TRANSITION_	62	-0.551104	-2.22798	0	0.000130531	0.011	3670	tags=45%, list=12%, signal=51%
YoungHSCe_vs_AgedHSCe	OSWALD_HEMATOPOIETIC_STEM_CELL_IN_COLLAGEN_GEL_UP	209	-0.452304	-2.22492	0	0.000129333	0.011	3218	tags=33%, list=11%, signal=37%
YoungHSCe_vs_AgedHSCe	PECE_MAMMARY_STEM_CELL_UP	129	-0.480925	-2.22172	0	0.000138937	0.012	3679	tags=39%, list=12%, signal=44%
YoungHSCe_vs_AgedHSCe	PODAR_RESPONSE_TO_ADAPHOSTIN_UP	144	-0.466824	-2.22116	0	0.000137685	0.012	2953	tags=36%, list=10%, signal=40%
YoungHSCe_vs_AgedHSCe	SENESE_HDAC1_TARGETS_UP	402	-0.416107	-2.21826	0	0.000136456	0.012	3449	tags=32%, list=12%, signal=36%
YoungHSCe_vs_AgedHSCe	SHAFFER_IRF4_TARGETS_IN_MYELOMA_VS_MATURE_B_LYMPHOCYTE	99	-0.506302	-2.21602	0	0.000145576	0.013	3638	tags=35%, list=12%, signal=40%
YoungHSCe_vs_AgedHSCe	PID_CIRCADIAN_PATHWAY	15	-0.782628	-2.21063	0	0.000164682	0.015	1113	tags=53%, list=4%, signal=55%
YoungHSCe_vs_AgedHSCe	BILANGES_SERUM_RESPONSE_TRANSLATION	30	-0.647314	-2.21005	0	0.00016325	0.015	3832	tags=63%, list=13%, signal=73%
YoungHSCe_vs_AgedHSCe	PID_P53_REGULATION_PATHWAY	59	-0.55487	-2.20926	0	0.000161842	0.015	2491	tags=39%, list=8%, signal=42%
YoungHSCe_vs_AgedHSCe	AMIT_DELAYED_EARLY_GENES	18	-0.728424	-2.20241	0	0.000190262	0.018	2784	tags=56%, list=9%, signal=61%
YoungHSCe_vs_AgedHSCe	DEBIASI_APOPTOSIS_BY_REOVIRUS_INFECTION_UP	298	-0.425593	-2.20003	0	0.000198581	0.019	3699	tags=36%, list=12%, signal=41%
YoungHSCe_vs_AgedHSCe	YAO_TEMPORAL_RESPONSE_TO_PROGESTERONE_CLUSTER_14	136	-0.469055	-2.19164	0	0.000235822	0.023	3740	tags=32%, list=13%, signal=37%
YoungHSCe_vs_AgedHSCe	REACTOME_SIGNALING_BY_TGF_BETA_RECEPTOR_COMPLEX	59	-0.549726	-2.19029	0	0.000233857	0.023	3637	tags=42%, list=12%, signal=48%
YoungHSCe_vs_AgedHSCe	NAKAYAMA_FRA2_TARGETS	41	-0.582151	-2.1878	0	0.000260768	0.026	2895	tags=46%, list=10%, signal=51%
YoungHSCe_vs_AgedHSCe	SASSON_RESPONSE_TO_GONADOTROPHINS_DN	84	-0.513181	-2.18514	0	0.000268201	0.027	3692	tags=37%, list=12%, signal=42%
YoungHSCe_vs_AgedHSCe	KEGG_PROTEIN_EXPORT	24	-0.687444	-2.18315	0	0.000275723	0.028	2816	tags=50%, list=9%, signal=55%
YoungHSCe_vs_AgedHSCe	REACTOME_APC_C_CDH1_MEDIATED_DEGRADATION_OF_CDC20_AND_OTHER_APC_C_CDH1_TARGETED_PROTEINS_IN_LATE_MITOSIS_EARLY_G1	64	-0.537237	-2.18083	0	0.000283001	0.029	3434	tags=44%, list=12%, signal=49%
YoungHSCe_vs_AgedHSCe	REACTOME_CITRIC_ACID_CYCLE_TCA_CYCLE	20	-0.703507	-2.18053	0	0.000280736	0.029	2962	tags=50%, list=10%, signal=55%
YoungHSCe_vs_AgedHSCe	SCHAEFFER_PROSTATE_DEVELOPMENT_6HR_DN	465	-0.397802	-2.17907	0	0.000278508	0.029	3159	tags=31%, list=11%, signal=34%
YoungHSCe_vs_AgedHSCe	MULLIGHAN_NPM1_MUTATED_SIGNATURE_2_DN	70	-0.523998	-2.1762	0	0.000276315	0.029	3262	tags=40%, list=11%, signal=45%
YoungHSCe_vs_AgedHSCe	UDAYAKUMAR_MED1_TARGETS_DN	219	-0.436548	-2.16324	0	0.000338023	0.036	3276	tags=32%, list=11%, signal=36%
YoungHSCe_vs_AgedHSCe	BIOCARTA_P53HYPOXIA_PATHWAY	23	-0.680613	-2.16221	0	0.000335402	0.036	2917	tags=52%, list=10%, signal=58%
YoungHSCe_vs_AgedHSCe	RASHI_RESPONSE_TO_IONIZING_RADIATION_6	68	-0.526902	-2.16133	0	0.000341904	0.037	3436	tags=34%, list=12%, signal=38%
YoungHSCe_vs_AgedHSCe	HARRIS_HYPOXIA	68	-0.521008	-2.15697	0	0.000356978	0.039	5909	tags=46%, list=20%, signal=57%
YoungHSCe_vs_AgedHSCe	WONG_PROTEASOME_GENE_MODULE	49	-0.575097	-2.15454	0	0.000371859	0.041	3434	tags=49%, list=12%, signal=55%
YoungHSCe_vs_AgedHSCe	ZHONG_SECRETOME_OF_LUNG_CANCER_AND_FIBROBLAST	125	-0.470983	-2.15445	0	0.000369063	0.041	2810	tags=30%, list=9%, signal=33%
YoungHSCe_vs_AgedHSCe	KEGG_HUNTINGTONS_DISEASE	162	-0.456069	-2.15429	0	0.000375157	0.042	3682	tags=32%, list=12%, signal=36%
YoungHSCe_vs_AgedHSCe	HOLLEMAN_ASPARAGINASE_RESISTANCE_B_ALL_UP	24	-0.671905	-2.1513	0	0.000372378	0.042	7437	tags=79%, list=25%, signal=105%
YoungHSCe_vs_AgedHSCe	KEGG_PARKINSONS_DISEASE	103	-0.481998	-2.15117	0	0.00036964	0.042	3638	tags=34%, list=12%, signal=39%
YoungHSCe_vs_AgedHSCe	SASSON_RESPONSE_TO_FORSKOLIN_UP	82	-0.499602	-2.15092	0	0.000375429	0.043	3633	tags=39%, list=12%, signal=44%
YoungHSCe_vs_AgedHSCe	HOLLEMAN_VINCRISTINE_RESISTANCE_B_ALL_UP	34	-0.608671	-2.14849	0	0.000372709	0.043	2001	tags=35%, list=7%, signal=38%
YoungHSCe_vs_AgedHSCe	AZARE_STAT3_TARGETS	20	-0.690948	-2.14493	0	0.000412675	0.048	2616	tags=50%, list=9%, signal=55%
YoungHSCe_vs_AgedHSCe	PASINI_SUZ12_TARGETS_DN	288	-0.415817	-2.14299	0	0.000434782	0.051	3563	tags=28%, list=12%, signal=32%
YoungHSCe_vs_AgedHSCe	DELASERNA_MYOD_TARGETS_UP	74	-0.507287	-2.14268	0	0.000431699	0.051	1835	tags=24%, list=6%, signal=26%
YoungHSCe_vs_AgedHSCe	YAO_TEMPORAL_RESPONSE_TO_PROGESTERONE_CLUSTER_17	175	-0.437795	-2.14138	0	0.000436667	0.052	3292	tags=28%, list=11%, signal=31%
YoungHSCe_vs_AgedHSCe	REACTOME_APC_C_CDC20_MEDIATED_DEGRADATION_OF_MITOTIC_PROTEINS	65	-0.531899	-2.13742	0	0.000458137	0.055	3434	tags=43%, list=12%, signal=49%
YoungHSCe_vs_AgedHSCe	REACTOME_METABOLISM_OF_PROTEINS	420	-0.399319	-2.1354	0	0.00047939	0.058	3741	tags=32%, list=13%, signal=36%
YoungHSCe_vs_AgedHSCe	OUELLET_OVARIAN_CANCER_INVASIVE_VS_LMP_UP	117	-0.468864	-2.13338	0	0.000483991	0.059	3468	tags=36%, list=12%, signal=40%
YoungHSCe_vs_AgedHSCe	CARD_MIR302A_TARGETS	69	-0.524392	-2.13157	0	0.000480676	0.059	3982	tags=42%, list=13%, signal=48%
YoungHSCe_vs_AgedHSCe	PHONG_TNF_RESPONSE_VIA_P38_COMPLETE	218	-0.430934	-2.13014	0	0.000517428	0.064	3247	tags=30%, list=11%, signal=33%
YoungHSCe_vs_AgedHSCe	KEGG_OXIDATIVE_PHOSPHORYLATION	109	-0.475577	-2.12811	0	0.000521888	0.065	3543	tags=34%, list=12%, signal=38%
YoungHSCe_vs_AgedHSCe	PURBEY_TARGETS_OF_CTBP1_AND_SATB1_UP	79	-0.499528	-2.12552	0	0.000526077	0.066	3340	tags=34%, list=11%, signal=38%
YoungHSCe_vs_AgedHSCe	PUIFFE_INVASION_INHIBITED_BY_ASCITES_DN	135	-0.457302	-2.12488	0	0.00052257	0.066	3525	tags=37%, list=12%, signal=42%
YoungHSCe_vs_AgedHSCe	NATSUME_RESPONSE_TO_INTERFERON_BETA_DN	48	-0.559245	-2.12364	0	0.000526817	0.067	3330	tags=44%, list=11%, signal=49%
YoungHSCe_vs_AgedHSCe	GENTILE_UV_RESPONSE_CLUSTER_D2	41	-0.571267	-2.1234	0	0.000531037	0.068	2601	tags=39%, list=9%, signal=43%
YoungHSCe_vs_AgedHSCe	FERRANDO_T_ALL_WITH_MLL_ENL_FUSION_UP	84	-0.500538	-2.12312	0	0.000527566	0.068	3920	tags=39%, list=13%, signal=45%
YoungHSCe_vs_AgedHSCe	PID_ECADHERIN_NASCENT_AJ_PATHWAY	39	-0.588633	-2.12012	0	0.000555032	0.072	2936	tags=38%, list=10%, signal=43%
YoungHSCe_vs_AgedHSCe	REACTOME_TGF_BETA_RECEPTOR_SIGNALING_ACTIVATES_SMADS	24	-0.667569	-2.11862	0	0.000566708	0.074	3607	tags=50%, list=12%, signal=57%
YoungHSCe_vs_AgedHSCe	PID_NCADHERIN_PATHWAY	29	-0.633139	-2.11829	0	0.000563075	0.074	2254	tags=48%, list=8%, signal=52%
YoungHSCe_vs_AgedHSCe	CHEN_LVAD_SUPPORT_OF_FAILING_HEART_UP	90	-0.490311	-2.11683	0	0.000566961	0.075	3406	tags=34%, list=11%, signal=39%
YoungHSCe_vs_AgedHSCe	WEST_ADRENOCORTICAL_TUMOR_UP	281	-0.416459	-2.11209	0	0.000593266	0.079	3280	tags=30%, list=11%, signal=34%
YoungHSCe_vs_AgedHSCe	FALVELLA_SMOKERS_WITH_LUNG_CANCER	66	-0.50996	-2.11152	0	0.000589535	0.079	2423	tags=33%, list=8%, signal=36%
YoungHSCe_vs_AgedHSCe	GINESTIER_BREAST_CANCER_ZNF217_AMPLIFIED_DN	306	-0.406894	-2.11095	0	0.000585851	0.079	2662	tags=25%, list=9%, signal=27%
YoungHSCe_vs_AgedHSCe	SMITH_TERT_TARGETS_UP	138	-0.453261	-2.11066	0	0.000589648	0.08	3701	tags=36%, list=12%, signal=40%
YoungHSCe_vs_AgedHSCe	KEGG_RNA_DEGRADATION	58	-0.539905	-2.10933	0.00186567	0.000586008	0.08	2489	tags=36%, list=8%, signal=39%
YoungHSCe_vs_AgedHSCe	HOLLEMAN_ASPARAGINASE_RESISTANCE_ALL_DN	23	-0.656383	-2.10805	0	0.000618314	0.085	3447	tags=48%, list=12%, signal=54%
YoungHSCe_vs_AgedHSCe	GARGALOVIC_RESPONSE_TO_OXIDIZED_PHOSPHOLIPIDS_TURQUOISE_UP	72	-0.509906	-2.10799	0	0.000614544	0.085	2505	tags=33%, list=8%, signal=36%
YoungHSCe_vs_AgedHSCe	PHONG_TNF_RESPONSE_NOT_VIA_P38	315	-0.401761	-2.10717	0	0.000618134	0.086	3656	tags=30%, list=12%, signal=34%
YoungHSCe_vs_AgedHSCe	SEIDEN_ONCOGENESIS_BY_MET	84	-0.486714	-2.10494	0	0.00065687	0.092	3183	tags=35%, list=11%, signal=39%
YoungHSCe_vs_AgedHSCe	GALINDO_IMMUNE_RESPONSE_TO_ENTEROTOXIN	80	-0.493823	-2.10372	0	0.000681292	0.094	3535	tags=41%, list=12%, signal=47%
YoungHSCe_vs_AgedHSCe	ZUCCHI_METASTASIS_DN	39	-0.577988	-2.10169	0	0.000684119	0.095	1572	tags=31%, list=5%, signal=32%
YoungHSCe_vs_AgedHSCe	FAELT_B_CLL_WITH_VH3_21_UP	42	-0.569254	-2.09978	0	0.000694164	0.096	3666	tags=50%, list=12%, signal=57%
YoungHSCe_vs_AgedHSCe	BILANGES_RAPAMYCIN_SENSITIVE_VIA_TSC1_AND_TSC2	68	-0.511761	-2.09969	0	0.000696934	0.097	3585	tags=37%, list=12%, signal=42%
YoungHSCe_vs_AgedHSCe	BURTON_ADIPOGENESIS_1	32	-0.606181	-2.09951	0	0.000692859	0.097	3204	tags=41%, list=11%, signal=45%
YoungHSCe_vs_AgedHSCe	LEONARD_HYPOXIA	45	-0.576571	-2.09938	0	0.000695619	0.097	2607	tags=38%, list=9%, signal=41%
YoungHSCe_vs_AgedHSCe	HU_ANGIOGENESIS_DN	37	-0.580166	-2.09403	0	0.000745567	0.105	3070	tags=35%, list=10%, signal=39%
YoungHSCe_vs_AgedHSCe	FINETTI_BREAST_CANCERS_KINOME_GRAY	15	-0.735738	-2.08875	0	0.00085563	0.121	3616	tags=60%, list=12%, signal=68%
YoungHSCe_vs_AgedHSCe	ZHANG_RESPONSE_TO_CANTHARIDIN_UP	17	-0.705235	-2.08866	0.00194553	0.000850741	0.121	2467	tags=41%, list=8%, signal=45%
YoungHSCe_vs_AgedHSCe	TARTE_PLASMA_CELL_VS_B_LYMPHOCYTE_DN	37	-0.589592	-2.08707	0	0.000872646	0.125	2530	tags=41%, list=8%, signal=44%
YoungHSCe_vs_AgedHSCe	REACTOME_SIGNALING_BY_FGFR_MUTANTS	35	-0.582607	-2.08629	0	0.000874347	0.126	1977	tags=34%, list=7%, signal=37%
YoungHSCe_vs_AgedHSCe	GARGALOVIC_RESPONSE_TO_OXIDIZED_PHOSPHOLIPIDS_MAGENTA_UP	26	-0.630772	-2.08478	0	0.000901983	0.131	3218	tags=54%, list=11%, signal=60%
YoungHSCe_vs_AgedHSCe	MILI_PSEUDOPODIA_CHEMOTAXIS_DN	435	-0.38508	-2.08412	0	0.000923036	0.135	3666	tags=30%, list=12%, signal=34%
YoungHSCe_vs_AgedHSCe	HOLLMANN_APOPTOSIS_VIA_CD40_UP	189	-0.42461	-2.0831	0	0.000924426	0.136	3494	tags=31%, list=12%, signal=35%
YoungHSCe_vs_AgedHSCe	NIKOLSKY_BREAST_CANCER_12Q24_AMPLICON	15	-0.733031	-2.08112	0	0.000958372	0.141	6155	tags=60%, list=21%, signal=76%
YoungHSCe_vs_AgedHSCe	REACTOME_ORC1_REMOVAL_FROM_CHROMATIN	65	-0.508643	-2.07695	0	0.00101079	0.149	3434	tags=40%, list=12%, signal=45%
YoungHSCe_vs_AgedHSCe	BOYAULT_LIVER_CANCER_SUBCLASS_G3_UP	183	-0.431061	-2.07685	0	0.00101151	0.15	3701	tags=35%, list=12%, signal=40%
YoungHSCe_vs_AgedHSCe	KINSEY_TARGETS_OF_EWSR1_FLII_FUSION_DN	296	-0.402132	-2.07453	0	0.00104422	0.154	2128	tags=23%, list=7%, signal=25%
YoungHSCe_vs_AgedHSCe	REACTOME_UNFOLDED_PROTEIN_RESPONSE	76	-0.49553	-2.07361	0	0.00106388	0.158	2771	tags=32%, list=9%, signal=35%
YoungHSCe_vs_AgedHSCe	DITTMER_PTHLH_TARGETS_UP	110	-0.459065	-2.0702	0	0.00108995	0.162	3760	tags=35%, list=13%, signal=39%
YoungHSCe_vs_AgedHSCe	MORI_PRE_BI_LYMPHOCYTE_DN	70	-0.503528	-2.064	0	0.0012221	0.178	3436	tags=39%, list=12%, signal=43%
YoungHSCe_vs_AgedHSCe	PHONG_TNF_RESPONSE_VIA_P38_PARTIAL	148	-0.437969	-2.06394	0	0.0012156	0.178	3481	tags=32%, list=12%, signal=37%
YoungHSCe_vs_AgedHSCe	WIERENGA_STAT5A_TARGETS_GROUP2	52	-0.53701	-2.06275	0	0.00122763	0.181	3362	tags=35%, list=11%, signal=39%
YoungHSCe_vs_AgedHSCe	RAHMAN_TP53_TARGETS_PHOSPHORYLATED	21	-0.644559	-2.0626	0.0041841	0.00122117	0.181	1361	tags=24%, list=5%, signal=25%
YoungHSCe_vs_AgedHSCe	ONKEN_UVEAL_MELANOMA_DN	500	-0.374609	-2.06066	0	0.00124541	0.185	3740	tags=29%, list=13%, signal=33%
YoungHSCe_vs_AgedHSCe	SMIRNOV_RESPONSE_TO_IR_2HR_UP	49	-0.536364	-2.06044	0	0.00123893	0.185	3449	tags=43%, list=12%, signal=48%
YoungHSCe_vs_AgedHSCe	REACTOME_ASSEMBLY_OF_THE_PRE_REPLICATIVE_COMPLEX	63	-0.509384	-2.05904	0	0.00126943	0.191	3434	tags=41%, list=12%, signal=47%
YoungHSCe_vs_AgedHSCe	MCLACHLAN_DENTAL_CARIES_UP	199	-0.419492	-2.05844	0	0.00126894	0.192	3481	tags=27%, list=12%, signal=30%
YoungHSCe_vs_AgedHSCe	PID_LIS1_PATHWAY	25	-0.635053	-2.0567	0	0.00128054	0.195	3538	tags=44%, list=12%, signal=50%
YoungHSCe_vs_AgedHSCe	MARTENS_BOUND_BY_PML_RARA_FUSION	434	-0.38394	-2.05562	0	0.0012918	0.197	3713	tags=29%, list=12%, signal=33%
YoungHSCe_vs_AgedHSCe	REACTOME_DIABETES_PATHWAYS	117	-0.446533	-2.0554	0	0.00129122	0.198	4251	tags=33%, list=14%, signal=39%
YoungHSCe_vs_AgedHSCe	SNIJDERS_AMPLIFIED_IN_HEAD_AND_NECK_TUMORS	34	-0.581906	-2.05331	0	0.00130269	0.2	2427	tags=32%, list=8%, signal=35%
YoungHSCe_vs_AgedHSCe	GARGALOVIC_RESPONSE_TO_OXIDIZED_PHOSPHOLIPIDS_BLACK_UP	32	-0.585387	-2.05316	0	0.00130223	0.2	3157	tags=44%, list=11%, signal=49%
YoungHSCe_vs_AgedHSCe	WELCSH_BRCA1_TARGETS_DN	136	-0.44266	-2.04962	0	0.00133097	0.206	3766	tags=36%, list=13%, signal=41%
YoungHSCe_vs_AgedHSCe	BIOCARTA_GSK3_PATHWAY	24	-0.629989	-2.04554	0	0.00139422	0.215	1981	tags=46%, list=7%, signal=49%
YoungHSCe_vs_AgedHSCe	ZHONG_SECRETOME_OF_LUNG_CANCER_AND_ENDOTHELIUM	62	-0.507193	-2.04297	0	0.00143379	0.223	2475	tags=29%, list=8%, signal=32%
YoungHSCe_vs_AgedHSCe	VARELA_ZMPSTE24_TARGETS_UP	37	-0.575496	-2.04141	0	0.00145552	0.225	2658	tags=43%, list=9%, signal=47%
YoungHSCe_vs_AgedHSCe	GOLDRATH_HOMEOSTATIC_PROLIFERATION	163	-0.427192	-2.04081	0	0.0014714	0.229	3740	tags=34%, list=13%, signal=38%
YoungHSCe_vs_AgedHSCe	ZHOU_INFLAMMATORY_RESPONSE_LIVE_UP	366	-0.382247	-2.04055	0	0.00146993	0.229	3495	tags=27%, list=12%, signal=31%
YoungHSCe_vs_AgedHSCe	DAIRKEE_CANCER_PRONE_RESPONSE_BPA_E2	106	-0.456925	-2.03778	0	0.00151433	0.236	3786	tags=42%, list=13%, signal=47%
YoungHSCe_vs_AgedHSCe	UEDA_CENTRAL_CLOCK	80	-0.483899	-2.03695	0	0.00152403	0.239	3608	tags=35%, list=12%, signal=40%
YoungHSCe_vs_AgedHSCe	NAGY_STAGA_COMPONENTS_HUMAN	15	-0.712249	-2.03602	0	0.00154516	0.243	3221	tags=47%, list=11%, signal=52%
YoungHSCe_vs_AgedHSCe	MORI_PLASMA_CELL_UP	49	-0.530554	-2.03417	0	0.00156043	0.246	3329	tags=41%, list=11%, signal=46%
YoungHSCe_vs_AgedHSCe	REACTOME_CIRCADIAN_CLOCK	50	-0.536267	-2.03253	0	0.00160871	0.251	3064	tags=46%, list=10%, signal=51%
YoungHSCe_vs_AgedHSCe	REACTOME_ADAPTIVE_IMMUNE_SYSTEM	481	-0.374988	-2.02952	0	0.00166753	0.26	3699	tags=30%, list=12%, signal=34%
YoungHSCe_vs_AgedHSCe	GAVIN_FOXP3_TARGETS_CLUSTER_T7	93	-0.459766	-2.02873	0	0.0016652	0.26	3477	tags=38%, list=12%, signal=42%
YoungHSCe_vs_AgedHSCe	CAFFAREL_RESPONSE_TO_THC_24HR_5_UP	31	-0.592124	-2.02832	0	0.00166849	0.262	3523	tags=45%, list=12%, signal=51%
YoungHSCe_vs_AgedHSCe	MOREAUX_MULTIPLE_MYELOMA_BY_TACI_DN	165	-0.422739	-2.02649	0	0.00168283	0.264	2986	tags=30%, list=10%, signal=33%
YoungHSCe_vs_AgedHSCe	TIEN_INTESTINE_PROBIOTICS_2HR_UP	27	-0.605307	-2.02618	0	0.00168049	0.264	3383	tags=52%, list=11%, signal=58%
YoungHSCe_vs_AgedHSCe	REACTOME_DOWNREGULATION_OF_TGF_BETA_RECEPTOR_SIGNALING	21	-0.642357	-2.02588	0	0.0016782	0.265	3607	tags=48%, list=12%, signal=54%
YoungHSCe_vs_AgedHSCe	STARK_PREFRONTAL_CORTEX_22Q11_DELETION_DN	477	-0.371609	-2.02565	0	0.0016758	0.266	3742	tags=28%, list=13%, signal=31%
YoungHSCe_vs_AgedHSCe	EPPERT_HSC_R	116	-0.44251	-2.02472	0	0.00170041	0.27	2958	tags=34%, list=10%, signal=37%
YoungHSCe_vs_AgedHSCe	RUTELLA_RESPONSE_TO_HGF_DN	216	-0.408898	-2.02331	0	0.00172444	0.275	3022	tags=31%, list=10%, signal=34%
YoungHSCe_vs_AgedHSCe	APRELIKOVA_BRCA1_TARGETS	44	-0.540207	-2.02305	0	0.0017326	0.277	3008	tags=50%, list=10%, signal=56%
YoungHSCe_vs_AgedHSCe	MARTORIATI_MDM4_TARGETS_FETAL_LIVER_DN	469	-0.37053	-2.02296	0	0.00172476	0.277	3551	tags=30%, list=12%, signal=34%
YoungHSCe_vs_AgedHSCe	REACTOME_APOPTOSIS	137	-0.431039	-2.02273	0	0.00172217	0.278	3449	tags=34%, list=12%, signal=38%
YoungHSCe_vs_AgedHSCe	FLECHNER_PBL_KIDNEY_TRANSPLANT_OK_VS_DONOR_UP	146	-0.429683	-2.02247	0	0.00171445	0.278	3114	tags=32%, list=10%, signal=35%
YoungHSCe_vs_AgedHSCe	SHI_SPARC_TARGETS_UP	23	-0.625255	-2.02243	0	0.00170679	0.278	2889	tags=43%, list=10%, signal=48%
YoungHSCe_vs_AgedHSCe	KARLSSON_TGFB1_TARGETS_UP	120	-0.445759	-2.02226	0	0.00170443	0.278	3042	tags=28%, list=10%, signal=31%
YoungHSCe_vs_AgedHSCe	MONNIER_POSTRADIATION_TUMOR_ESCAPE_UP	370	-0.379767	-2.022	0	0.00170209	0.279	3270	tags=30%, list=11%, signal=33%
YoungHSCe_vs_AgedHSCe	JIANG_HYPOXIA_VIA_VHL	34	-0.565058	-2.02059	0	0.00173613	0.286	3299	tags=38%, list=11%, signal=43%
YoungHSCe_vs_AgedHSCe	GARY_CD5_TARGETS_DN	421	-0.373609	-2.01921	0	0.00174905	0.289	2988	tags=27%, list=10%, signal=30%
YoungHSCe_vs_AgedHSCe	SHAFFER_IRF4_TARGETS_IN_PLASMA_CELL_VS_MATURE_B_LYMPHOCYTE	65	-0.496334	-2.01909	0	0.0017465	0.289	2752	tags=29%, list=9%, signal=32%
YoungHSCe_vs_AgedHSCe	CHEN_PDGF_TARGETS	18	-0.66947	-2.01823	0	0.00175412	0.29	842	tags=33%, list=3%, signal=34%
YoungHSCe_vs_AgedHSCe	SPIELMAN_LYMPHOBLAST_EUROPEAN_VS_ASIAN_2FC_DN	19	-0.657862	-2.01648	0.0019084	0.0017924	0.299	1435	tags=37%, list=5%, signal=39%
YoungHSCe_vs_AgedHSCe	FOSTER_TOLERANT_MACROPHAGE_DN	388	-0.37891	-2.01638	0	0.00178467	0.299	2719	tags=25%, list=9%, signal=27%
YoungHSCe_vs_AgedHSCe	PID_AJDISS_2PATHWAY	44	-0.533291	-2.01606	0	0.00179212	0.3	2775	tags=36%, list=9%, signal=40%
YoungHSCe_vs_AgedHSCe	REACTOME_CLASS_I_MHC_MEDIATED_ANTIGEN_PROCESSING_PRESENTATION	225	-0.403985	-2.015	0	0.00179451	0.301	3434	tags=33%, list=12%, signal=37%
YoungHSCe_vs_AgedHSCe	REACTOME_RNA_POL_II_TRANSCRIPTION	97	-0.455328	-2.01406	0	0.00182674	0.307	2692	tags=34%, list=9%, signal=37%
YoungHSCe_vs_AgedHSCe	HAHTOLA_MYCOSIS_FUNGOIDES_CD4_DN	113	-0.446121	-2.01394	0	0.00182399	0.308	2326	tags=28%, list=8%, signal=31%
YoungHSCe_vs_AgedHSCe	PELLICCIOTTA_HDAC_IN_ANTIGEN_PRESENTATION_UP	62	-0.497209	-2.0133	0	0.00182128	0.309	2440	tags=39%, list=8%, signal=42%
YoungHSCe_vs_AgedHSCe	LI_AMPLIFIED_IN_LUNG_CANCER	155	-0.425183	-2.01263	0	0.00185288	0.313	3810	tags=35%, list=13%, signal=40%
YoungHSCe_vs_AgedHSCe	YAO_TEMPORAL_RESPONSE_TO_PROGESTERONE_CLUSTER_13	167	-0.41752	-2.01241	0	0.00184512	0.313	3598	tags=28%, list=12%, signal=31%
YoungHSCe_vs_AgedHSCe	ELVIDGE_HYPOXIA_DN	138	-0.429377	-2.01006	0	0.00189601	0.322	3274	tags=30%, list=11%, signal=34%
YoungHSCe_vs_AgedHSCe	JIANG_HYPOXIA_NORMAL	283	-0.390149	-2.00992	0	0.00188815	0.322	3707	tags=31%, list=12%, signal=35%
YoungHSCe_vs_AgedHSCe	CONCANNON_APOPTOSIS_BY_EPOXOMICIN_UP	223	-0.400379	-2.00919	0	0.00190445	0.324	3181	tags=30%, list=11%, signal=33%
YoungHSCe_vs_AgedHSCe	DURCHDEWALD_SKIN_CARCINOGENESIS_DN	237	-0.401576	-2.0084	0	0.00192068	0.326	3218	tags=29%, list=11%, signal=32%
YoungHSCe_vs_AgedHSCe	PID_THROMBIN_PAR1_PATHWAY	41	-0.546814	-2.00685	0	0.00194137	0.33	2992	tags=44%, list=10%, signal=49%
YoungHSCe_vs_AgedHSCe	SENESE_HDAC2_TARGETS_UP	104	-0.451858	-2.00551	0	0.00198066	0.336	3656	tags=36%, list=12%, signal=40%
YoungHSCe_vs_AgedHSCe	REACTOME_ANTIGEN_PRESENTATION_FOLDING_ASSEMBLY_AND_PEPTIDE_LOADING_OF_CLASS_I_MHC	21	-0.645478	-2.00412	0	0.00200598	0.343	3383	tags=48%, list=11%, signal=54%
YoungHSCe_vs_AgedHSCe	DELASERNA_MYOD_TARGETS_DN	51	-0.516454	-2.00309	0	0.00201203	0.344	1768	tags=24%, list=6%, signal=25%
YoungHSCe_vs_AgedHSCe	DAUER_STAT3_TARGETS_UP	41	-0.543755	-1.99977	0	0.002089	0.356	2915	tags=32%, list=10%, signal=35%
YoungHSCe_vs_AgedHSCe	PENG_RAPAMYCIN_RESPONSE_DN	239	-0.393468	-1.99961	0	0.00208061	0.356	3235	tags=29%, list=11%, signal=33%
YoungHSCe_vs_AgedHSCe	NOJIMA_SFRP2_TARGETS_UP	27	-0.601875	-1.99934	0	0.002077	0.357	2826	tags=44%, list=9%, signal=49%
YoungHSCe_vs_AgedHSCe	WANG_CLIM2_TARGETS_DN	177	-0.412891	-1.99817	0	0.0020967	0.362	2326	tags=27%, list=8%, signal=29%
YoungHSCe_vs_AgedHSCe	HOLLEMAN_ASPARAGINASE_RESISTANCE_ALL_UP	21	-0.632148	-1.99767	0	0.00210221	0.364	5899	tags=57%, list=20%, signal=71%
YoungHSCe_vs_AgedHSCe	REACTOME_PI3K_AKT_ACTIVATION	35	-0.56941	-1.99742	0	0.0020939	0.364	3616	tags=34%, list=12%, signal=39%
YoungHSCe_vs_AgedHSCe	SCHAEFFER_SOX9_TARGETS_IN_PROSTATE_DEVELOPMENT_DN	42	-0.541718	-1.99735	0	0.00208566	0.364	4125	tags=43%, list=14%, signal=50%
YoungHSCe_vs_AgedHSCe	GRADE_COLON_AND_RECTAL_CANCER_UP	271	-0.38624	-1.99333	0	0.00217854	0.377	3417	tags=29%, list=11%, signal=33%
YoungHSCe_vs_AgedHSCe	TARTE_PLASMA_CELL_VS_PLASMABLAST_DN	306	-0.381722	-1.99298	0	0.00217459	0.378	3724	tags=29%, list=12%, signal=33%
YoungHSCe_vs_AgedHSCe	GROSS_HYPOXIA_VIA_ELK3_AND_HIF1A_UP	135	-0.430649	-1.99188	0	0.00220269	0.382	3608	tags=32%, list=12%, signal=36%
YoungHSCe_vs_AgedHSCe	VALK_AML_WITH_EVI1	22	-0.624907	-1.9903	0.00192678	0.00223059	0.387	2580	tags=36%, list=9%, signal=40%
YoungHSCe_vs_AgedHSCe	KERLEY_RESPONSE_TO_CISPLATIN_UP	42	-0.541513	-1.98771	0	0.00228105	0.393	3692	tags=31%, list=12%, signal=35%
YoungHSCe_vs_AgedHSCe	THEILGAARD_NEUTROPHIL_AT_SKIN_WOUND_UP	70	-0.485301	-1.9871	0	0.00228557	0.394	3486	tags=41%, list=12%, signal=47%
YoungHSCe_vs_AgedHSCe	PID_FOXO_PATHWAY	48	-0.513711	-1.98705	0	0.00227681	0.394	1857	tags=27%, list=6%, signal=29%
YoungHSCe_vs_AgedHSCe	REACTOME_M_G1_TRANSITION	78	-0.467407	-1.9866	0	0.00228134	0.396	3434	tags=36%, list=12%, signal=40%
YoungHSCe_vs_AgedHSCe	AMIT_EGF_RESPONSE_240_HELA	58	-0.501906	-1.98655	0	0.00227266	0.396	3519	tags=43%, list=12%, signal=49%
YoungHSCe_vs_AgedHSCe	MEINHOLD_OVARIAN_CANCER_LOW_GRADE_DN	20	-0.635937	-1.98623	0.00404858	0.00227319	0.398	3445	tags=45%, list=12%, signal=51%
YoungHSCe_vs_AgedHSCe	DORSAM_HOXA9_TARGETS_UP	34	-0.565808	-1.9857	0.00195695	0.0022734	0.399	2738	tags=47%, list=9%, signal=52%
YoungHSCe_vs_AgedHSCe	BOYAULT_LIVER_CANCER_SUBCLASS_G5_DN	26	-0.607686	-1.98563	0.00184162	0.00226485	0.399	1913	tags=35%, list=6%, signal=37%
YoungHSCe_vs_AgedHSCe	HOLLEMAN_VINCRISTINE_RESISTANCE_ALL_DN	19	-0.646205	-1.98119	0	0.00236165	0.413	4220	tags=58%, list=14%, signal=67%
YoungHSCe_vs_AgedHSCe	LAIHO_COLORECTAL_CANCER_SERRATED_UP	105	-0.450572	-1.98051	0	0.00236593	0.415	3575	tags=35%, list=12%, signal=40%
YoungHSCe_vs_AgedHSCe	LI_DCP2_BOUND_MRNA	89	-0.461356	-1.98004	0	0.00237019	0.418	3559	tags=34%, list=12%, signal=38%
YoungHSCe_vs_AgedHSCe	OSMAN_BLADDER_CANCER_UP	388	-0.370196	-1.97818	0	0.00241373	0.426	3478	tags=30%, list=12%, signal=34%
YoungHSCe_vs_AgedHSCe	SASSON_RESPONSE_TO_FORSKOLIN_DN	85	-0.464648	-1.97712	0	0.0024353	0.429	3692	tags=32%, list=12%, signal=36%
YoungHSCe_vs_AgedHSCe	REACTOME_OXYGEN_DEPENDENT_PROLINE_HYDROXYLATION_OF_HYPOXIA_INDUCIBLE_FACTOR_ALPHA	16	-0.676536	-1.97605	0	0.00247378	0.434	2801	tags=50%, list=9%, signal=55%
YoungHSCe_vs_AgedHSCe	PID_TRKR_PATHWAY	56	-0.497527	-1.97549	0	0.00247761	0.436	2680	tags=34%, list=9%, signal=37%
YoungHSCe_vs_AgedHSCe	PID_NFKAPPAB_ATYPICAL_PATHWAY	17	-0.67009	-1.97255	0	0.00255399	0.447	1977	tags=41%, list=7%, signal=44%
YoungHSCe_vs_AgedHSCe	REACTOME_PI3K_EVENTS_IN_ERBB4_SIGNALING	35	-0.547135	-1.97247	0	0.00255324	0.448	9959	tags=71%, list=33%, signal=107%
YoungHSCe_vs_AgedHSCe	TAKAO_RESPONSE_TO_UVB_RADIATION_DN	96	-0.451478	-1.97111	0	0.0025824	0.454	3448	tags=38%, list=12%, signal=42%
YoungHSCe_vs_AgedHSCe	KIM_GERMINAL_CENTER_T_HELPER_DN	21	-0.647785	-1.9702	0	0.00260655	0.46	3725	tags=52%, list=12%, signal=60%
YoungHSCe_vs_AgedHSCe	YAGI_AML_WITH_T_9_11_TRANSLOCATION	113	-0.433758	-1.96909	0	0.00260567	0.461	2768	tags=27%, list=9%, signal=29%
YoungHSCe_vs_AgedHSCe	HOSHIDA_LIVER_CANCER_SUBCLASS_S1	222	-0.397304	-1.96557	0	0.00268432	0.472	3481	tags=30%, list=12%, signal=33%
YoungHSCe_vs_AgedHSCe	GAZDA_DIAMOND_BLACKFAN_ANEMIA_MYELOID_UP	29	-0.582627	-1.96556	0.00193424	0.00267473	0.472	3449	tags=31%, list=12%, signal=35%
YoungHSCe_vs_AgedHSCe	REACTOME_SIGNALING_BY_FGFR_IN_DISEASE	112	-0.436467	-1.96345	0	0.00276991	0.487	2801	tags=28%, list=9%, signal=30%
YoungHSCe_vs_AgedHSCe	BRACHAT_RESPONSE_TO_METHOTREXATE_UP	23	-0.619545	-1.96159	0	0.00282632	0.495	2987	tags=48%, list=10%, signal=53%
YoungHSCe_vs_AgedHSCe	MULLIGHAN_NPM1_SIGNATURE_3_DN	145	-0.42055	-1.96133	0	0.00282046	0.495	3577	tags=30%, list=12%, signal=34%
YoungHSCe_vs_AgedHSCe	AGUIRRE_PANCREATIC_CANCER_COPY_NUMBER_UP	280	-0.384395	-1.96015	0	0.00284342	0.499	3040	tags=27%, list=10%, signal=30%
YoungHSCe_vs_AgedHSCe	ZHANG_RESPONSE_TO_IKK_INHIBITOR_AND_TNF_UP	195	-0.398094	-1.95097	0	0.00319155	0.542	2763	tags=27%, list=9%, signal=30%
YoungHSCe_vs_AgedHSCe	REACTOME_REGULATION_OF_MITOTIC_CELL_CYCLE	77	-0.458514	-1.94992	0	0.00320084	0.545	3434	tags=38%, list=12%, signal=42%
YoungHSCe_vs_AgedHSCe	WANG_LMO4_TARGETS_DN	328	-0.373446	-1.94898	0	0.0032306	0.55	3728	tags=30%, list=12%, signal=33%
YoungHSCe_vs_AgedHSCe	SASSON_RESPONSE_TO_GONADOTROPHINS_UP	82	-0.454993	-1.94808	0	0.00325199	0.551	3633	tags=34%, list=12%, signal=39%
YoungHSCe_vs_AgedHSCe	LEE_RECENT_THYMIC_EMIGRANT	206	-0.395079	-1.94493	0	0.00333414	0.56	3259	tags=29%, list=11%, signal=32%
YoungHSCe_vs_AgedHSCe	AMUNDSON_RESPONSE_TO_ARSENITE	202	-0.390202	-1.94414	0	0.00335514	0.563	3741	tags=32%, list=13%, signal=36%
YoungHSCe_vs_AgedHSCe	REN_ALVEOLAR_RHABDOMYOSARCOMA_DN	391	-0.367067	-1.94362	0	0.00338778	0.569	3623	tags=27%, list=12%, signal=30%
YoungHSCe_vs_AgedHSCe	REACTOME_DEADENYLATION_DEPENDENT_MRNA_DECAY	43	-0.521115	-1.94053	0	0.0035131	0.585	3666	tags=44%, list=12%, signal=50%
YoungHSCe_vs_AgedHSCe	BIOCARTA_ARAP_PATHWAY	17	-0.662559	-1.9401	0	0.00353321	0.589	5317	tags=59%, list=18%, signal=72%
YoungHSCe_vs_AgedHSCe	REACTOME_SIGNALING_BY_EGFR_IN_CANCER	103	-0.426904	-1.93939	0	0.00355731	0.593	3228	tags=31%, list=11%, signal=35%
YoungHSCe_vs_AgedHSCe	TIEN_INTESTINE_PROBIOTICS_6HR_DN	159	-0.41215	-1.93758	0	0.00363303	0.6	3389	tags=32%, list=11%, signal=36%
YoungHSCe_vs_AgedHSCe	ZHENG_FOXP3_TARGETS_IN_THYMUS_UP	184	-0.40063	-1.93727	0	0.00364069	0.601	2949	tags=31%, list=10%, signal=34%
YoungHSCe_vs_AgedHSCe	GENTILE_UV_RESPONSE_CLUSTER_D4	54	-0.495812	-1.93685	0	0.00364797	0.602	3559	tags=39%, list=12%, signal=44%
YoungHSCe_vs_AgedHSCe	SENESE_HDAC3_TARGETS_UP	443	-0.360046	-1.93655	0	0.00364356	0.602	3449	tags=27%, list=12%, signal=30%
YoungHSCe_vs_AgedHSCe	SAKAI_TUMOR_INFILTRATING_MONOCYTES_DN	79	-0.461854	-1.93571	0	0.0036625	0.606	3480	tags=32%, list=12%, signal=36%
YoungHSCe_vs_AgedHSCe	BROWNE_HCMV_INFECTION_12HR_UP	99	-0.443595	-1.93483	0	0.00368577	0.611	2812	tags=29%, list=9%, signal=32%
YoungHSCe_vs_AgedHSCe	SHEN_SMARCA2_TARGETS_UP	415	-0.356977	-1.93268	0	0.00373577	0.616	3174	tags=28%, list=11%, signal=31%
YoungHSCe_vs_AgedHSCe	RICKMAN_HEAD_AND_NECK_CANCER_B	28	-0.572805	-1.92973	0.00190114	0.0038907	0.63	457	tags=14%, list=2%, signal=14%
YoungHSCe_vs_AgedHSCe	FLECHNER_PBL_KIDNEY_TRANSPLANT_REJECTED_VS_OK_DN	50	-0.512449	-1.92951	0.00192678	0.00388572	0.632	2530	tags=38%, list=8%, signal=41%
YoungHSCe_vs_AgedHSCe	REACTOME_PI_3K_CASCADE	45	-0.514518	-1.92804	0	0.0039311	0.641	3616	tags=29%, list=12%, signal=33%
YoungHSCe_vs_AgedHSCe	MELLMAN_TUT1_TARGETS_DN	47	-0.506362	-1.92735	0	0.00394921	0.645	2229	tags=23%, list=7%, signal=25%
YoungHSCe_vs_AgedHSCe	AMIT_EGF_RESPONSE_120_HELA	66	-0.46953	-1.9272	0.0019084	0.00394784	0.646	3922	tags=39%, list=13%, signal=45%
YoungHSCe_vs_AgedHSCe	PHONG_TNF_TARGETS_UP	57	-0.492674	-1.92661	0	0.00395414	0.648	3481	tags=35%, list=12%, signal=40%
YoungHSCe_vs_AgedHSCe	JIANG_VHL_TARGETS	132	-0.41887	-1.92657	0	0.0039413	0.648	3599	tags=30%, list=12%, signal=34%
YoungHSCe_vs_AgedHSCe	REACTOME_SIGNALING_BY_FGFR1_MUTANTS	24	-0.598274	-1.92535	0	0.00399748	0.653	2696	tags=42%, list=9%, signal=46%
YoungHSCe_vs_AgedHSCe	BYSTRYKH_HEMATOPOIESIS_STEM_CELL_AND_BRAIN_QTL_CIS	60	-0.484602	-1.92366	0	0.00404117	0.658	3699	tags=38%, list=12%, signal=44%
YoungHSCe_vs_AgedHSCe	PID_AR_PATHWAY	58	-0.48483	-1.92195	0	0.00412272	0.673	3000	tags=34%, list=10%, signal=38%
YoungHSCe_vs_AgedHSCe	OUYANG_PROSTATE_CANCER_PROGRESSION_DN	20	-0.617503	-1.92146	0.00572519	0.00413202	0.675	1859	tags=35%, list=6%, signal=37%
YoungHSCe_vs_AgedHSCe	MOOTHA_TCA	16	-0.668607	-1.92099	0.0019802	0.00415615	0.681	2962	tags=56%, list=10%, signal=62%
YoungHSCe_vs_AgedHSCe	LI_INDUCED_T_TO_NATURAL_KILLER_UP	285	-0.372185	-1.92016	0	0.00418032	0.684	3292	tags=23%, list=11%, signal=25%
YoungHSCe_vs_AgedHSCe	REACTOME_MEMBRANE_TRAFFICKING	108	-0.424676	-1.91918	0	0.00420054	0.686	3209	tags=36%, list=11%, signal=40%
YoungHSCe_vs_AgedHSCe	BROWNE_HCMV_INFECTION_16HR_UP	214	-0.386068	-1.91898	0	0.00418725	0.686	2986	tags=29%, list=10%, signal=32%
YoungHSCe_vs_AgedHSCe	REACTOME_SIGNALLING_BY_NGF	202	-0.389807	-1.9176	0	0.00424051	0.693	3228	tags=30%, list=11%, signal=33%
YoungHSCe_vs_AgedHSCe	BIOCARTA_GCR_PATHWAY	17	-0.648505	-1.91629	0.00197239	0.0042934	0.699	2917	tags=53%, list=10%, signal=59%
YoungHSCe_vs_AgedHSCe	CAFFAREL_RESPONSE_TO_THC_24HR_5_DN	55	-0.489835	-1.91496	0.00371747	0.00435309	0.707	3337	tags=35%, list=11%, signal=39%
YoungHSCe_vs_AgedHSCe	KEGG_VASOPRESSIN_REGULATED_WATER_REABSORPTION	40	-0.513446	-1.91251	0.00191939	0.00449346	0.717	2436	tags=33%, list=8%, signal=35%
YoungHSCe_vs_AgedHSCe	KEGG_NEUROTROPHIN_SIGNALING_PATHWAY	118	-0.417985	-1.91216	0	0.00449402	0.718	2254	tags=30%, list=8%, signal=32%
YoungHSCe_vs_AgedHSCe	PID_ECADHERIN_KERATINOCYTE_PATHWAY	19	-0.618738	-1.91139	0.00416667	0.00450929	0.722	2254	tags=42%, list=8%, signal=46%
YoungHSCe_vs_AgedHSCe	BAKKER_FOXO3_TARGETS_UP	58	-0.479152	-1.9113	0	0.00449533	0.722	1540	tags=22%, list=5%, signal=24%
YoungHSCe_vs_AgedHSCe	RASHI_NFKB1_TARGETS	19	-0.637165	-1.9105	0	0.0044998	0.722	3481	tags=63%, list=12%, signal=71%
YoungHSCe_vs_AgedHSCe	REACTOME_ELONGATION_ARREST_AND_RECOVERY	27	-0.576006	-1.91002	0	0.00452212	0.723	3494	tags=44%, list=12%, signal=50%
YoungHSCe_vs_AgedHSCe	MULLIGHAN_NPM1_MUTATED_SIGNATURE_1_DN	114	-0.419323	-1.90523	0	0.00480312	0.744	3311	tags=30%, list=11%, signal=33%
YoungHSCe_vs_AgedHSCe	SAKAI_CHRONIC_HEPATITIS_VS_LIVER_CANCER_UP	79	-0.452607	-1.9052	0.0018797	0.004792	0.744	3683	tags=37%, list=12%, signal=42%
YoungHSCe_vs_AgedHSCe	THEILGAARD_NEUTROPHIL_AT_SKIN_WOUND_DN	220	-0.38231	-1.90478	0	0.00480609	0.745	3607	tags=33%, list=12%, signal=37%
YoungHSCe_vs_AgedHSCe	BIOCARTA_RAS_PATHWAY	23	-0.587283	-1.90356	0.00186916	0.00487355	0.751	2254	tags=48%, list=8%, signal=52%
YoungHSCe_vs_AgedHSCe	DASU_IL6_SIGNALING_UP	51	-0.491321	-1.90275	0	0.0049087	0.756	3607	tags=35%, list=12%, signal=40%
YoungHSCe_vs_AgedHSCe	HEDENFALK_BREAST_CANCER_BRCA1_VS_BRCA2	155	-0.400063	-1.90274	0	0.00489387	0.756	3786	tags=32%, list=13%, signal=36%
YoungHSCe_vs_AgedHSCe	HOLLEMAN_VINCRISTINE_RESISTANCE_B_ALL_DN	15	-0.657648	-1.90245	0	0.00490041	0.758	5464	tags=67%, list=18%, signal=82%
YoungHSCe_vs_AgedHSCe	RODRIGUES_THYROID_CARCINOMA_DN	69	-0.464505	-1.90235	0	0.00489301	0.758	3481	tags=38%, list=12%, signal=43%
YoungHSCe_vs_AgedHSCe	MOOTHA_VOXPHOS	87	-0.448966	-1.90225	0	0.00489243	0.758	3543	tags=31%, list=12%, signal=35%
YoungHSCe_vs_AgedHSCe	YAMAZAKI_TCEB3_TARGETS_UP	160	-0.401234	-1.89994	0	0.00498959	0.763	3614	tags=29%, list=12%, signal=33%
YoungHSCe_vs_AgedHSCe	BRACHAT_RESPONSE_TO_CISPLATIN	20	-0.623529	-1.8995	0	0.00498867	0.764	2799	tags=50%, list=9%, signal=55%
YoungHSCe_vs_AgedHSCe	XU_CREBBP_TARGETS_DN	39	-0.522409	-1.89826	0	0.00502633	0.767	3920	tags=41%, list=13%, signal=47%
YoungHSCe_vs_AgedHSCe	YAO_TEMPORAL_RESPONSE_TO_PROGESTERONE_CLUSTER_11	97	-0.430088	-1.89704	0.00381679	0.00506029	0.77	2946	tags=33%, list=10%, signal=36%
YoungHSCe_vs_AgedHSCe	REACTOME_PIP3_ACTIVATES_AKT_SIGNALING	27	-0.561036	-1.89609	0.0019084	0.00510762	0.774	9959	tags=70%, list=33%, signal=106%
YoungHSCe_vs_AgedHSCe	PUJANA_BRCA2_PCC_NETWORK	405	-0.352299	-1.894	0	0.00520664	0.784	3786	tags=27%, list=13%, signal=31%
YoungHSCe_vs_AgedHSCe	ZHENG_BOUND_BY_FOXP3	441	-0.352032	-1.89326	0	0.00523625	0.786	2361	tags=22%, list=8%, signal=24%
YoungHSCe_vs_AgedHSCe	ZHU_CMV_24_HR_UP	90	-0.433958	-1.8923	0	0.00527606	0.79	3311	tags=36%, list=11%, signal=40%
YoungHSCe_vs_AgedHSCe	AMIT_SERUM_RESPONSE_120_MCF10A	63	-0.471465	-1.89174	0	0.00529496	0.794	2958	tags=32%, list=10%, signal=35%
YoungHSCe_vs_AgedHSCe	PID_NETRIN_PATHWAY	30	-0.541218	-1.89087	0.00199203	0.00534117	0.798	3759	tags=47%, list=13%, signal=53%
YoungHSCe_vs_AgedHSCe	PID_S1P_META_PATHWAY	18	-0.639862	-1.89074	0.004	0.00532909	0.798	3304	tags=44%, list=11%, signal=50%
YoungHSCe_vs_AgedHSCe	DIRMEIER_LMP1_RESPONSE_LATE_UP	57	-0.478602	-1.89017	0.0019305	0.00537137	0.802	6275	tags=49%, list=21%, signal=62%
YoungHSCe_vs_AgedHSCe	HOEBEKE_LYMPHOID_STEM_CELL_UP	92	-0.434016	-1.89005	0	0.00536919	0.804	3502	tags=36%, list=12%, signal=41%
YoungHSCe_vs_AgedHSCe	REACTOME_MHC_CLASS_II_ANTIGEN_PRESENTATION	85	-0.441671	-1.88998	0	0.0053571	0.804	3699	tags=36%, list=12%, signal=42%
YoungHSCe_vs_AgedHSCe	ALONSO_METASTASIS_UP	180	-0.392787	-1.88891	0	0.00539219	0.806	3552	tags=28%, list=12%, signal=32%
YoungHSCe_vs_AgedHSCe	AGUIRRE_PANCREATIC_CANCER_COPY_NUMBER_DN	224	-0.378636	-1.88803	0	0.00545378	0.812	3742	tags=33%, list=13%, signal=37%
YoungHSCe_vs_AgedHSCe	NAGASHIMA_EGF_SIGNALING_UP	56	-0.481444	-1.88655	0	0.00553141	0.817	3252	tags=38%, list=11%, signal=42%
YoungHSCe_vs_AgedHSCe	REACTOME_EGFR_DOWNREGULATION	23	-0.592875	-1.88565	0.00188324	0.00558916	0.824	3169	tags=48%, list=11%, signal=53%
YoungHSCe_vs_AgedHSCe	HINATA_NFKB_TARGETS_FIBROBLAST_UP	68	-0.458819	-1.88516	0	0.00559634	0.825	3481	tags=38%, list=12%, signal=43%
YoungHSCe_vs_AgedHSCe	JOHNSTONE_PARVB_TARGETS_2_DN	314	-0.359392	-1.87803	0	0.00609498	0.849	3345	tags=28%, list=11%, signal=31%
YoungHSCe_vs_AgedHSCe	NIKOLSKY_BREAST_CANCER_22Q13_AMPLICON	17	-0.642676	-1.87709	0	0.00613394	0.849	5468	tags=65%, list=18%, signal=79%
YoungHSCe_vs_AgedHSCe	REACTOME_MITOTIC_M_M_G1_PHASES	165	-0.390661	-1.87647	0	0.00616317	0.851	2192	tags=22%, list=7%, signal=24%
YoungHSCe_vs_AgedHSCe	REACTOME_REGULATION_OF_HYPOXIA_INDUCIBLE_FACTOR_HIF_BY_OXYGEN	23	-0.579405	-1.87592	0.00606061	0.00621208	0.856	2801	tags=43%, list=9%, signal=48%
YoungHSCe_vs_AgedHSCe	DORN_ADENOVIRUS_INFECTION_24HR_DN	38	-0.526188	-1.875	0	0.00624402	0.858	3204	tags=45%, list=11%, signal=50%
YoungHSCe_vs_AgedHSCe	LAU_APOPTOSIS_CDKN2A_UP	55	-0.484396	-1.87432	0	0.00628236	0.86	2252	tags=31%, list=8%, signal=33%
YoungHSCe_vs_AgedHSCe	RAO_BOUND_BY_SALL4_ISOFORM_B	426	-0.349374	-1.8732	0	0.00633364	0.864	3898	tags=29%, list=13%, signal=32%
YoungHSCe_vs_AgedHSCe	STEARMAN_LUNG_CANCER_EARLY_VS_LATE_UP	121	-0.414369	-1.87272	0	0.00635199	0.864	3324	tags=32%, list=11%, signal=36%
YoungHSCe_vs_AgedHSCe	JOHNSTONE_PARVB_TARGETS_3_UP	402	-0.351794	-1.87153	0	0.00643193	0.872	3618	tags=25%, list=12%, signal=28%
YoungHSCe_vs_AgedHSCe	DELACROIX_RARG_BOUND_MEF	326	-0.358757	-1.87113	0	0.00643983	0.873	3444	tags=26%, list=12%, signal=29%
YoungHSCe_vs_AgedHSCe	SWEET_LUNG_CANCER_KRAS_UP	442	-0.342643	-1.87098	0	0.0064447	0.873	3575	tags=26%, list=12%, signal=29%
YoungHSCe_vs_AgedHSCe	LIN_MELANOMA_COPY_NUMBER_DN	41	-0.510985	-1.87085	0	0.00643342	0.873	3383	tags=44%, list=11%, signal=49%
YoungHSCe_vs_AgedHSCe	FARDIN_HYPOXIA_11	32	-0.526229	-1.87054	0	0.00643177	0.873	2471	tags=31%, list=8%, signal=34%
YoungHSCe_vs_AgedHSCe	DIRMEIER_LMP1_RESPONSE_EARLY	62	-0.460868	-1.87043	0	0.0064208	0.874	2929	tags=37%, list=10%, signal=41%
YoungHSCe_vs_AgedHSCe	REACTOME_SIGNALING_BY_FGFR1_FUSION_MUTANTS	18	-0.608345	-1.87041	0.00186567	0.00640335	0.874	2696	tags=44%, list=9%, signal=49%
YoungHSCe_vs_AgedHSCe	SCHEIDEREIT_IKK_TARGETS	17	-0.636285	-1.86938	0	0.00645613	0.878	1900	tags=53%, list=6%, signal=57%
YoungHSCe_vs_AgedHSCe	PENG_GLUCOSE_DEPRIVATION_DN	156	-0.396862	-1.8668	0	0.00659104	0.889	3435	tags=31%, list=12%, signal=35%
YoungHSCe_vs_AgedHSCe	CARDOSO_RESPONSE_TO_GAMMA_RADIATION_AND_3AB	17	-0.635493	-1.86584	0.00205761	0.00665533	0.892	2590	tags=41%, list=9%, signal=45%
YoungHSCe_vs_AgedHSCe	LOPEZ_TRANSLATION_VIA_FN1_SIGNALING	35	-0.535711	-1.86578	0.0056391	0.00664065	0.892	3494	tags=49%, list=12%, signal=55%
YoungHSCe_vs_AgedHSCe	REACTOME_ANTIGEN_PROCESSING_UBIQUITINATION_PROTEASOME_DEGRADATION	191	-0.380658	-1.86476	0	0.0067079	0.893	3434	tags=32%, list=12%, signal=36%
YoungHSCe_vs_AgedHSCe	SHAFFER_IRF4_MULTIPLE_MYELOMA_PROGRAM	34	-0.524583	-1.86471	0.00384615	0.00668997	0.893	3638	tags=38%, list=12%, signal=43%
YoungHSCe_vs_AgedHSCe	MOHANKUMAR_TLX1_TARGETS_UP	380	-0.351678	-1.86456	0	0.00668144	0.893	3561	tags=27%, list=12%, signal=31%
YoungHSCe_vs_AgedHSCe	IIZUKA_LIVER_CANCER_PROGRESSION_G1_G2_DN	24	-0.579499	-1.86437	0.00387597	0.00668877	0.896	2897	tags=46%, list=10%, signal=51%
YoungHSCe_vs_AgedHSCe	BROWNE_HCMV_INFECTION_8HR_UP	98	-0.414827	-1.86342	0	0.00674876	0.898	1970	tags=23%, list=7%, signal=25%
YoungHSCe_vs_AgedHSCe	DORSAM_HOXA9_TARGETS_DN	31	-0.534825	-1.8625	0.00397614	0.0067929	0.901	2436	tags=39%, list=8%, signal=42%
YoungHSCe_vs_AgedHSCe	BIOCARTA_CXCR4_PATHWAY	22	-0.581759	-1.86248	0	0.00677497	0.901	2242	tags=41%, list=8%, signal=44%
YoungHSCe_vs_AgedHSCe	BIOCARTA_WNT_PATHWAY	25	-0.55649	-1.86194	0.00389105	0.0068067	0.901	2762	tags=40%, list=9%, signal=44%
YoungHSCe_vs_AgedHSCe	KYNG_WERNER_SYNDROM_AND_NORMAL_AGING_DN	204	-0.376194	-1.86041	0	0.00689096	0.904	3713	tags=28%, list=12%, signal=32%
YoungHSCe_vs_AgedHSCe	POMEROY_MEDULLOBLASTOMA_PROGNOSIS_DN	42	-0.500017	-1.86017	0.0018622	0.00688826	0.904	3283	tags=40%, list=11%, signal=45%
YoungHSCe_vs_AgedHSCe	YOSHIMURA_MAPK8_TARGETS_DN	326	-0.356206	-1.85977	0	0.00690407	0.904	3670	tags=28%, list=12%, signal=31%
YoungHSCe_vs_AgedHSCe	GAZDA_DIAMOND_BLACKFAN_ANEMIA_PROGENITOR_UP	39	-0.512832	-1.85947	0.00192678	0.00689829	0.905	3406	tags=44%, list=11%, signal=49%
YoungHSCe_vs_AgedHSCe	WANG_METHYLATED_IN_BREAST_CANCER	30	-0.547299	-1.85933	0	0.00689264	0.905	3692	tags=37%, list=12%, signal=42%
YoungHSCe_vs_AgedHSCe	ZHU_CMV_ALL_UP	113	-0.407836	-1.85926	0	0.00688694	0.905	3311	tags=35%, list=11%, signal=39%
YoungHSCe_vs_AgedHSCe	KOINUMA_COLON_CANCER_MSI_UP	15	-0.661108	-1.85906	0.0060241	0.00688431	0.905	1934	tags=33%, list=6%, signal=36%
YoungHSCe_vs_AgedHSCe	PID_TGFBR_PATHWAY	53	-0.478995	-1.85895	0	0.00687274	0.905	3759	tags=34%, list=13%, signal=39%
YoungHSCe_vs_AgedHSCe	ZWANG_CLASS_1_TRANSIENTLY_INDUCED_BY_EGF	432	-0.343294	-1.85863	0	0.00688517	0.905	3183	tags=24%, list=11%, signal=26%
YoungHSCe_vs_AgedHSCe	SCHMIDT_POR_TARGETS_IN_LIMB_BUD_UP	23	-0.580041	-1.85839	0.00187266	0.00688274	0.905	1799	tags=26%, list=6%, signal=28%
YoungHSCe_vs_AgedHSCe	LI_LUNG_CANCER	35	-0.515094	-1.85771	0.00189036	0.00692498	0.907	2324	tags=37%, list=8%, signal=40%
YoungHSCe_vs_AgedHSCe	REACTOME_BMAL1_CLOCK_NPAS2_ACTIVATES_CIRCADIAN_EXPRESSION	35	-0.522333	-1.85757	0	0.00691929	0.907	3535	tags=43%, list=12%, signal=49%
YoungHSCe_vs_AgedHSCe	GALE_APL_WITH_FLT3_MUTATED_DN	17	-0.633591	-1.85559	0	0.00704168	0.911	3046	tags=47%, list=10%, signal=52%
YoungHSCe_vs_AgedHSCe	VANTVEER_BREAST_CANCER_ESR1_DN	211	-0.371786	-1.85512	0	0.00705956	0.911	3656	tags=27%, list=12%, signal=30%
YoungHSCe_vs_AgedHSCe	WANG_LMO4_TARGETS_UP	333	-0.352658	-1.85372	0	0.00715151	0.914	3487	tags=26%, list=12%, signal=30%
YoungHSCe_vs_AgedHSCe	MARTINEZ_RESPONSE_TO_TRABECTEDIN_DN	266	-0.364278	-1.85369	0	0.00713345	0.914	2970	tags=28%, list=10%, signal=31%
YoungHSCe_vs_AgedHSCe	PENG_LEUCINE_DEPRIVATION_DN	184	-0.382021	-1.85337	0	0.00714503	0.915	3628	tags=33%, list=12%, signal=37%
YoungHSCe_vs_AgedHSCe	REACTOME_GOLGI_ASSOCIATED_VESICLE_BIOGENESIS	47	-0.485762	-1.85009	0	0.00739215	0.924	2270	tags=32%, list=8%, signal=34%
YoungHSCe_vs_AgedHSCe	SESTO_RESPONSE_TO_UV_C5	46	-0.479577	-1.84735	0	0.00757426	0.933	3101	tags=41%, list=10%, signal=46%
YoungHSCe_vs_AgedHSCe	REACTOME_ACTIVATION_OF_CHAPERONE_GENES_BY_XBP1S	45	-0.494395	-1.84704	0.00190476	0.00758185	0.935	2771	tags=31%, list=9%, signal=34%
YoungHSCe_vs_AgedHSCe	ODONNELL_TARGETS_OF_MYC_AND_TFRC_UP	75	-0.44006	-1.84394	0	0.00784315	0.94	2708	tags=25%, list=9%, signal=28%
YoungHSCe_vs_AgedHSCe	KEGG_ALZHEIMERS_DISEASE	147	-0.392908	-1.84378	0	0.00782955	0.94	3683	tags=28%, list=12%, signal=32%
YoungHSCe_vs_AgedHSCe	PRAMOONJAGO_SOX4_TARGETS_UP	49	-0.480023	-1.84301	0	0.00788012	0.941	3204	tags=33%, list=11%, signal=37%
YoungHSCe_vs_AgedHSCe	REACTOME_DNA_REPLICATION	185	-0.382716	-1.84299	0	0.00786061	0.941	2192	tags=22%, list=7%, signal=24%
YoungHSCe_vs_AgedHSCe	RASHI_RESPONSE_TO_IONIZING_RADIATION_3	47	-0.489827	-1.84297	0	0.0078412	0.941	3628	tags=36%, list=12%, signal=41%
YoungHSCe_vs_AgedHSCe	LU_EZH2_TARGETS_DN	357	-0.346705	-1.84267	0	0.00785637	0.942	3487	tags=25%, list=12%, signal=28%
YoungHSCe_vs_AgedHSCe	FERRARI_RESPONSE_TO_FENRETINIDE_UP	19	-0.61009	-1.84255	0	0.00784575	0.943	3218	tags=42%, list=11%, signal=47%
YoungHSCe_vs_AgedHSCe	MCCLUNG_DELTA_FOSB_TARGETS_8WK	42	-0.502142	-1.84253	0.00204918	0.00782652	0.943	3759	tags=40%, list=13%, signal=46%
YoungHSCe_vs_AgedHSCe	LIANG_HEMATOPOIESIS_STEM_CELL_NUMBER_LARGE_VS_TINY_UP	41	-0.496714	-1.84243	0.0018315	0.00782175	0.943	3160	tags=39%, list=11%, signal=44%
YoungHSCe_vs_AgedHSCe	OUELLET_CULTURED_OVARIAN_CANCER_INVASIVE_VS_LMP_UP	66	-0.438652	-1.84173	0	0.007877	0.943	2995	tags=30%, list=10%, signal=34%
YoungHSCe_vs_AgedHSCe	MCCLUNG_COCAINE_REWARD_5D	70	-0.451544	-1.84021	0	0.0079636	0.943	2828	tags=31%, list=9%, signal=35%
YoungHSCe_vs_AgedHSCe	RUTELLA_RESPONSE_TO_HGF_VS_CSF2RB_AND_IL4_DN	228	-0.366514	-1.84	0	0.00795862	0.943	3252	tags=25%, list=11%, signal=28%
YoungHSCe_vs_AgedHSCe	PID_CXCR3_PATHWAY	40	-0.493177	-1.83773	0.00187266	0.00814702	0.947	2242	tags=33%, list=8%, signal=35%
YoungHSCe_vs_AgedHSCe	REACTOME_HIV_LIFE_CYCLE	109	-0.405101	-1.83671	0	0.00819791	0.947	3221	tags=34%, list=11%, signal=38%
YoungHSCe_vs_AgedHSCe	REACTOME_ACTIVATED_TAK1_MEDIATES_P38_MAPK_ACTIVATION	17	-0.623099	-1.83622	0	0.00821776	0.949	1105	tags=29%, list=4%, signal=31%
YoungHSCe_vs_AgedHSCe	MATTHEWS_AP1_TARGETS	16	-0.643557	-1.83604	0.00604839	0.00821782	0.949	154	tags=19%, list=1%, signal=19%
YoungHSCe_vs_AgedHSCe	SCHLOSSER_SERUM_RESPONSE_AUGMENTED_BY_MYC	99	-0.421698	-1.83395	0	0.00837016	0.952	2971	tags=31%, list=10%, signal=35%
YoungHSCe_vs_AgedHSCe	SANA_RESPONSE_TO_IFNG_DN	79	-0.43351	-1.83222	0	0.00848476	0.952	3444	tags=37%, list=12%, signal=41%
YoungHSCe_vs_AgedHSCe	BENPORATH_MYC_TARGETS_WITH_EBOX	217	-0.369883	-1.83049	0	0.00864952	0.958	3786	tags=30%, list=13%, signal=34%
YoungHSCe_vs_AgedHSCe	PLASARI_TGFB1_TARGETS_1HR_UP	33	-0.516541	-1.8303	0	0.00864025	0.958	3595	tags=36%, list=12%, signal=41%
YoungHSCe_vs_AgedHSCe	PID_NECTIN_PATHWAY	29	-0.530754	-1.82934	0.00379507	0.00871151	0.958	2254	tags=31%, list=8%, signal=34%
YoungHSCe_vs_AgedHSCe	PUIFFE_INVASION_INHIBITED_BY_ASCITES_UP	79	-0.426191	-1.82915	0.00193424	0.00871298	0.958	3475	tags=30%, list=12%, signal=34%
YoungHSCe_vs_AgedHSCe	REACTOME_CELL_CYCLE_CHECKPOINTS	112	-0.404073	-1.82879	0	0.00872828	0.958	3434	tags=31%, list=12%, signal=35%
YoungHSCe_vs_AgedHSCe	REACTOME_G1_S_TRANSITION	106	-0.416874	-1.82879	0.00197628	0.0087077	0.958	2801	tags=29%, list=9%, signal=32%
YoungHSCe_vs_AgedHSCe	VIETOR_IFRD1_TARGETS	22	-0.5775	-1.82804	0.00756144	0.00874798	0.96	3946	tags=36%, list=13%, signal=42%
YoungHSCe_vs_AgedHSCe	DANG_MYC_TARGETS_UP	136	-0.39168	-1.82793	0	0.00874676	0.96	3477	tags=32%, list=12%, signal=36%
YoungHSCe_vs_AgedHSCe	REACTOME_PI3K_EVENTS_IN_ERBB2_SIGNALING	41	-0.491111	-1.82682	0.00380952	0.00880295	0.961	8527	tags=54%, list=29%, signal=75%
YoungHSCe_vs_AgedHSCe	KEGG_PROSTATE_CANCER	85	-0.428135	-1.82592	0	0.00885628	0.962	2917	tags=29%, list=10%, signal=33%
YoungHSCe_vs_AgedHSCe	UZONYI_RESPONSE_TO_LEUKOTRIENE_AND_THROMBIN	36	-0.50551	-1.82568	0.00375235	0.00885482	0.962	1540	tags=28%, list=5%, signal=29%
YoungHSCe_vs_AgedHSCe	ACEVEDO_NORMAL_TISSUE_ADJACENT_TO_LIVER_TUMOR_DN	319	-0.351495	-1.82554	0	0.00885318	0.962	3832	tags=28%, list=13%, signal=31%
YoungHSCe_vs_AgedHSCe	HU_GENOTOXIN_ACTION_DIRECT_VS_INDIRECT_24HR	50	-0.470148	-1.82446	0	0.0089063	0.965	3471	tags=30%, list=12%, signal=34%
YoungHSCe_vs_AgedHSCe	REACTOME_SYNTHESIS_OF_DNA	90	-0.421325	-1.82437	0.00186916	0.00889104	0.965	2801	tags=30%, list=9%, signal=33%
YoungHSCe_vs_AgedHSCe	IKEDA_MIR30_TARGETS_UP	112	-0.399871	-1.82417	0	0.00887858	0.966	3734	tags=33%, list=13%, signal=38%
YoungHSCe_vs_AgedHSCe	PANGAS_TUMOR_SUPPRESSION_BY_SMAD1_AND_SMAD5_DN	140	-0.389188	-1.82355	0	0.00891484	0.966	3670	tags=29%, list=12%, signal=33%
YoungHSCe_vs_AgedHSCe	CHIARADONNA_NEOPLASTIC_TRANSFORMATION_KRAS_UP	117	-0.401054	-1.8233	0	0.0089268	0.967	3707	tags=30%, list=12%, signal=34%
YoungHSCe_vs_AgedHSCe	PID_PDGFRB_PATHWAY	128	-0.393741	-1.82329	0	0.00890897	0.967	2254	tags=29%, list=8%, signal=31%
YoungHSCe_vs_AgedHSCe	HOLLEMAN_VINCRISTINE_RESISTANCE_ALL_UP	25	-0.553482	-1.82302	0.00375235	0.00892937	0.967	3475	tags=44%, list=12%, signal=50%
YoungHSCe_vs_AgedHSCe	RAMASWAMY_METASTASIS_UP	65	-0.448746	-1.82298	0	0.00890899	0.967	3946	tags=34%, list=13%, signal=39%
YoungHSCe_vs_AgedHSCe	GRESHOCK_CANCER_COPY_NUMBER_UP	293	-0.35215	-1.82208	0	0.00899295	0.967	3176	tags=26%, list=11%, signal=29%
YoungHSCe_vs_AgedHSCe	YANG_BREAST_CANCER_ESR1_LASER_DN	44	-0.476774	-1.82185	0	0.00899366	0.967	3345	tags=34%, list=11%, signal=38%
YoungHSCe_vs_AgedHSCe	BURTON_ADIPOGENESIS_8	80	-0.432485	-1.82159	0.00205339	0.00899182	0.967	3740	tags=28%, list=13%, signal=31%
YoungHSCe_vs_AgedHSCe	HOFMANN_MYELODYSPLASTIC_SYNDROM_LOW_RISK_UP	18	-0.606396	-1.82108	0.0163599	0.00899798	0.967	2007	tags=44%, list=7%, signal=48%
YoungHSCe_vs_AgedHSCe	JACKSON_DNMT1_TARGETS_DN	21	-0.596173	-1.82101	0.00581395	0.00898289	0.967	1079	tags=24%, list=4%, signal=25%
YoungHSCe_vs_AgedHSCe	BOUDOUKHA_BOUND_BY_IGF2BP2	100	-0.415976	-1.82099	0	0.00896266	0.967	3540	tags=32%, list=12%, signal=36%
YoungHSCe_vs_AgedHSCe	REACTOME_TRANSCRIPTIONAL_REGULATION_OF_WHITE_ADIPOCYTE_DIFFERENTIATION	67	-0.44083	-1.82089	0	0.00894781	0.967	3707	tags=34%, list=12%, signal=39%
YoungHSCe_vs_AgedHSCe	REACTOME_SIGNALING_BY_FGFR	98	-0.41029	-1.82087	0	0.00892775	0.967	2801	tags=26%, list=9%, signal=28%
YoungHSCe_vs_AgedHSCe	BILD_HRAS_ONCOGENIC_SIGNATURE	230	-0.362726	-1.82079	0	0.00891039	0.967	3936	tags=30%, list=13%, signal=35%
YoungHSCe_vs_AgedHSCe	DORN_ADENOVIRUS_INFECTION_12HR_DN	32	-0.536245	-1.82058	0	0.00890372	0.967	3237	tags=53%, list=11%, signal=60%
YoungHSCe_vs_AgedHSCe	SWEET_KRAS_TARGETS_DN	54	-0.463315	-1.82028	0	0.00891007	0.967	3540	tags=33%, list=12%, signal=38%
YoungHSCe_vs_AgedHSCe	WELCSH_BRCA1_TARGETS_UP	186	-0.371754	-1.81861	0	0.00904675	0.969	3701	tags=30%, list=12%, signal=34%
YoungHSCe_vs_AgedHSCe	SMIRNOV_CIRCULATING_ENDOTHELIOCYTES_IN_CANCER_UP	139	-0.391466	-1.81852	0	0.00903449	0.969	4440	tags=32%, list=15%, signal=38%
YoungHSCe_vs_AgedHSCe	BROWNE_HCMV_INFECTION_20HR_UP	220	-0.367004	-1.81852	0	0.00901451	0.969	2986	tags=28%, list=10%, signal=31%
YoungHSCe_vs_AgedHSCe	REACTOME_DESTABILIZATION_OF_MRNA_BY_TRISTETRAPROLIN_TTP	17	-0.615295	-1.81334	0.00396825	0.0094683	0.974	2294	tags=41%, list=8%, signal=45%
YoungHSCe_vs_AgedHSCe	SAFFORD_T_LYMPHOCYTE_ANERGY	77	-0.431174	-1.81174	0	0.00960216	0.976	1775	tags=22%, list=6%, signal=23%
YoungHSCe_vs_AgedHSCe	BASSO_B_LYMPHOCYTE_NETWORK	137	-0.388575	-1.81105	0	0.00967113	0.978	2702	tags=22%, list=9%, signal=24%
YoungHSCe_vs_AgedHSCe	YAGI_AML_RELAPSE_PROGNOSIS	34	-0.517126	-1.81037	0.00383877	0.00972703	0.98	3700	tags=38%, list=12%, signal=44%
YoungHSCe_vs_AgedHSCe	MARTORIATI_MDM4_TARGETS_NEUROEPITHELIUM_UP	157	-0.379124	-1.80994	0	0.009734	0.98	3662	tags=24%, list=12%, signal=27%
YoungHSCe_vs_AgedHSCe	MMS_MOUSE_LYMPH_HIGH_4HRS_UP	34	-0.517158	-1.80979	0.00408163	0.0097229	0.98	3535	tags=41%, list=12%, signal=47%
YoungHSCe_vs_AgedHSCe	WHITFIELD_CELL_CYCLE_M_G1	139	-0.387175	-1.80973	0	0.00970938	0.98	1943	tags=22%, list=7%, signal=24%
YoungHSCe_vs_AgedHSCe	VANHARANTA_UTERINE_FIBROID_WITH_7Q_DELETION_UP	65	-0.440101	-1.80935	0	0.00973944	0.98	3196	tags=29%, list=11%, signal=33%
YoungHSCe_vs_AgedHSCe	NADLER_HYPERGLYCEMIA_AT_OBESITY	50	-0.462677	-1.80899	0.00367647	0.00974879	0.98	3989	tags=40%, list=13%, signal=46%
YoungHSCe_vs_AgedHSCe	HALMOS_CEBPA_TARGETS_DN	39	-0.503274	-1.80868	0	0.00975057	0.98	3237	tags=36%, list=11%, signal=40%
YoungHSCe_vs_AgedHSCe	WATANABE_RECTAL_CANCER_RADIOTHERAPY_RESPONSIVE_UP	98	-0.412457	-1.8078	0	0.00982842	0.982	2385	tags=30%, list=8%, signal=32%
YoungHSCe_vs_AgedHSCe	CAIRO_PML_TARGETS_BOUND_BY_MYC_UP	23	-0.559711	-1.80701	0.00389105	0.00986549	0.982	3187	tags=52%, list=11%, signal=58%
YoungHSCe_vs_AgedHSCe	BIOCARTA_TGFB_PATHWAY	19	-0.595233	-1.80666	0.00606061	0.00988728	0.982	1747	tags=32%, list=6%, signal=34%
YoungHSCe_vs_AgedHSCe	PID_IL2_1PATHWAY	53	-0.457484	-1.80613	0.00195312	0.00991633	0.983	2242	tags=32%, list=8%, signal=35%
YoungHSCe_vs_AgedHSCe	CHEOK_RESPONSE_TO_HD_MTX_DN	24	-0.556892	-1.80559	0.00948767	0.00994029	0.983	2281	tags=38%, list=8%, signal=41%
YoungHSCe_vs_AgedHSCe	MILI_PSEUDOPODIA	41	-0.492663	-1.8039	0	0.0101225	0.984	4657	tags=44%, list=16%, signal=52%
YoungHSCe_vs_AgedHSCe	JUBAN_TARGETS_OF_SPI1_AND_FLI1_DN	88	-0.41428	-1.80377	0	0.0101159	0.984	3607	tags=34%, list=12%, signal=39%
YoungHSCe_vs_AgedHSCe	SARRIO_EPITHELIAL_MESENCHYMAL_TRANSITION_DN	127	-0.390909	-1.8029	0	0.010199	0.984	2717	tags=24%, list=9%, signal=27%
YoungHSCe_vs_AgedHSCe	FERNANDEZ_BOUND_BY_MYC	167	-0.376424	-1.80231	0	0.0102471	0.984	3607	tags=28%, list=12%, signal=31%
YoungHSCe_vs_AgedHSCe	ENK_UV_RESPONSE_KERATINOCYTE_DN	470	-0.329883	-1.80216	0	0.0102404	0.984	3451	tags=26%, list=12%, signal=29%
YoungHSCe_vs_AgedHSCe	CHEOK_RESPONSE_TO_MERCAPTOPURINE_AND_HD_MTX_DN	21	-0.578047	-1.80109	0.00382409	0.0103304	0.984	3728	tags=52%, list=12%, signal=60%
YoungHSCe_vs_AgedHSCe	CHIARETTI_T_ALL_REFRACTORY_TO_THERAPY	30	-0.523306	-1.8007	0.00974659	0.0103406	0.985	2682	tags=30%, list=9%, signal=33%
YoungHSCe_vs_AgedHSCe	WEIGEL_OXIDATIVE_STRESS_BY_HNE_AND_H2O2	38	-0.498415	-1.80057	0	0.0103435	0.986	1973	tags=34%, list=7%, signal=37%
YoungHSCe_vs_AgedHSCe	HENDRICKS_SMARCA4_TARGETS_UP	43	-0.483836	-1.80055	0.00186567	0.0103266	0.986	1252	tags=21%, list=4%, signal=22%
YoungHSCe_vs_AgedHSCe	LEE_CALORIE_RESTRICTION_MUSCLE_DN	46	-0.473293	-1.80006	0.00382409	0.0103566	0.987	3010	tags=43%, list=10%, signal=48%
YoungHSCe_vs_AgedHSCe	LINDGREN_BLADDER_CANCER_CLUSTER_2A_DN	130	-0.390075	-1.79994	0	0.0103545	0.987	2310	tags=24%, list=8%, signal=26%
YoungHSCe_vs_AgedHSCe	REACTOME_GAB1_SIGNALOSOME	36	-0.501817	-1.79985	0.0019685	0.0103402	0.987	8468	tags=53%, list=28%, signal=74%
YoungHSCe_vs_AgedHSCe	MUNSHI_MULTIPLE_MYELOMA_UP	75	-0.426737	-1.79952	0	0.0103626	0.987	3907	tags=33%, list=13%, signal=38%
YoungHSCe_vs_AgedHSCe	GOLDRATH_ANTIGEN_RESPONSE	321	-0.345159	-1.79934	0	0.0103678	0.987	3278	tags=23%, list=11%, signal=26%
YoungHSCe_vs_AgedHSCe	ZHU_CMV_8_HR_DN	49	-0.475801	-1.79771	0	0.0105286	0.987	1835	tags=27%, list=6%, signal=28%
YoungHSCe_vs_AgedHSCe	MARTORIATI_MDM4_TARGETS_FETAL_LIVER_UP	206	-0.362602	-1.79731	0	0.0105433	0.987	3662	tags=24%, list=12%, signal=27%
YoungHSCe_vs_AgedHSCe	FLECHNER_PBL_KIDNEY_TRANSPLANT_REJECTED_VS_OK_UP	62	-0.441995	-1.79407	0	0.0108649	0.989	3699	tags=37%, list=12%, signal=42%
YoungHSCe_vs_AgedHSCe	PID_VEGFR1_2_PATHWAY	69	-0.436427	-1.79281	0	0.010968	0.989	3215	tags=28%, list=11%, signal=31%
YoungHSCe_vs_AgedHSCe	SHEDDEN_LUNG_CANCER_GOOD_SURVIVAL_A12	239	-0.358771	-1.7916	0	0.0110732	0.989	3372	tags=23%, list=11%, signal=26%
YoungHSCe_vs_AgedHSCe	FLECHNER_PBL_KIDNEY_TRANSPLANT_OK_VS_DONOR_DN	41	-0.498503	-1.78996	0	0.0112502	0.989	2795	tags=34%, list=9%, signal=38%
YoungHSCe_vs_AgedHSCe	UEDA_PERIFERAL_CLOCK	155	-0.379721	-1.78937	0	0.0112941	0.99	2476	tags=25%, list=8%, signal=27%
YoungHSCe_vs_AgedHSCe	AZARE_NEOPLASTIC_TRANSFORMATION_BY_STAT3_UP	98	-0.401705	-1.78834	0	0.0114119	0.991	3218	tags=32%, list=11%, signal=35%
YoungHSCe_vs_AgedHSCe	KEGG_RENAL_CELL_CARCINOMA	67	-0.432949	-1.78619	0.00183486	0.011609	0.994	2763	tags=30%, list=9%, signal=33%
YoungHSCe_vs_AgedHSCe	MELLMAN_TUT1_TARGETS_UP	18	-0.600888	-1.78481	0.00399202	0.0117723	0.995	3211	tags=44%, list=11%, signal=50%
YoungHSCe_vs_AgedHSCe	HILLION_HMGA1B_TARGETS	79	-0.421263	-1.78417	0	0.0118751	0.995	4220	tags=38%, list=14%, signal=44%
YoungHSCe_vs_AgedHSCe	THUM_SYSTOLIC_HEART_FAILURE_DN	207	-0.362735	-1.78314	0	0.0119753	0.996	3561	tags=29%, list=12%, signal=33%
YoungHSCe_vs_AgedHSCe	REACTOME_CTNNB1_PHOSPHORYLATION_CASCADE	15	-0.637255	-1.78207	0.00409836	0.0121003	0.996	1551	tags=40%, list=5%, signal=42%
YoungHSCe_vs_AgedHSCe	NEMETH_INFLAMMATORY_RESPONSE_LPS_UP	84	-0.414147	-1.78128	0	0.0121467	0.996	3633	tags=37%, list=12%, signal=42%
YoungHSCe_vs_AgedHSCe	CHEOK_RESPONSE_TO_HD_MTX_UP	16	-0.605957	-1.78084	0.00413223	0.0121696	0.996	2695	tags=31%, list=9%, signal=34%
YoungHSCe_vs_AgedHSCe	ULE_SPLICING_VIA_NOVA2	38	-0.507551	-1.77974	0.00188679	0.0122872	0.996	4629	tags=45%, list=16%, signal=53%
YoungHSCe_vs_AgedHSCe	BRUINS_UVC_RESPONSE_VIA_TP53_GROUP_B	463	-0.329585	-1.77961	0	0.0122742	0.996	3218	tags=22%, list=11%, signal=25%
YoungHSCe_vs_AgedHSCe	DE_YY1_TARGETS_DN	89	-0.413492	-1.77884	0	0.0123272	0.996	2630	tags=26%, list=9%, signal=28%
YoungHSCe_vs_AgedHSCe	PID_GMCSF_PATHWAY	34	-0.507501	-1.77877	0	0.0123095	0.996	2466	tags=41%, list=8%, signal=45%
YoungHSCe_vs_AgedHSCe	CAMPS_COLON_CANCER_COPY_NUMBER_UP	66	-0.445217	-1.77786	0	0.0124018	0.996	4139	tags=35%, list=14%, signal=40%
YoungHSCe_vs_AgedHSCe	PID_IL6_7_PATHWAY	42	-0.479647	-1.77702	0.00607287	0.0124848	0.998	2304	tags=36%, list=8%, signal=39%
YoungHSCe_vs_AgedHSCe	JIANG_TIP30_TARGETS_UP	41	-0.484175	-1.77441	0.00766283	0.0127743	0.999	3608	tags=34%, list=12%, signal=39%
YoungHSCe_vs_AgedHSCe	REACTOME_TRANSCRIPTIONAL_ACTIVITY_OF_SMAD2_SMAD3_SMAD4_HETEROTRIMER	35	-0.49252	-1.77381	0.0094697	0.0128	0.999	3637	tags=40%, list=12%, signal=46%
YoungHSCe_vs_AgedHSCe	PID_BETA_CATENIN_DEG_PATHWAY	17	-0.613796	-1.77367	0.00931099	0.0127979	0.999	2618	tags=53%, list=9%, signal=58%
YoungHSCe_vs_AgedHSCe	ELLWOOD_MYC_TARGETS_DN	37	-0.502035	-1.77286	0.008	0.0128583	0.999	2991	tags=30%, list=10%, signal=33%
YoungHSCe_vs_AgedHSCe	GRATIAS_RETINOBLASTOMA_16Q24	15	-0.6378	-1.77263	0.00779727	0.0128702	0.999	3689	tags=60%, list=12%, signal=68%
YoungHSCe_vs_AgedHSCe	JAZAERI_BREAST_CANCER_BRCA1_VS_BRCA2_UP	46	-0.472799	-1.77195	0.0018797	0.0129279	0.999	3114	tags=37%, list=10%, signal=41%
YoungHSCe_vs_AgedHSCe	KEEN_RESPONSE_TO_ROSIGLITAZONE_DN	92	-0.414507	-1.77133	0	0.0129763	0.999	2832	tags=28%, list=9%, signal=31%
YoungHSCe_vs_AgedHSCe	MOOTHA_PGC	397	-0.334221	-1.77079	0	0.0129925	0.999	3633	tags=26%, list=12%, signal=29%
YoungHSCe_vs_AgedHSCe	HAHTOLA_MYCOSIS_FUNGOIDES_SKIN_UP	170	-0.372078	-1.77033	0	0.0130155	0.999	3744	tags=31%, list=13%, signal=35%
YoungHSCe_vs_AgedHSCe	ZHOU_TNF_SIGNALING_30MIN	51	-0.4637	-1.77005	0	0.0130108	0.999	3832	tags=49%, list=13%, signal=56%
YoungHSCe_vs_AgedHSCe	SA_TRKA_RECEPTOR	16	-0.609533	-1.76967	0.00613497	0.0130402	0.999	1977	tags=44%, list=7%, signal=47%
YoungHSCe_vs_AgedHSCe	LEE_AGING_NEOCORTEX_UP	84	-0.415399	-1.76939	0	0.0130513	0.999	3869	tags=33%, list=13%, signal=38%
YoungHSCe_vs_AgedHSCe	HIRSCH_CELLULAR_TRANSFORMATION_SIGNATURE_UP	226	-0.355145	-1.76885	0	0.0130759	0.999	3160	tags=26%, list=11%, signal=29%
YoungHSCe_vs_AgedHSCe	NING_CHRONIC_OBSTRUCTIVE_PULMONARY_DISEASE_DN	115	-0.386004	-1.76868	0.00185874	0.0130688	0.999	4542	tags=35%, list=15%, signal=41%
YoungHSCe_vs_AgedHSCe	SHAFFER_IRF4_TARGETS_IN_ACTIVATED_DENDRITIC_CELL	62	-0.435284	-1.76746	0	0.013175	0.999	3638	tags=37%, list=12%, signal=42%
YoungHSCe_vs_AgedHSCe	MARTIN_INTERACT_WITH_HDAC	43	-0.47409	-1.76681	0.0039604	0.0132468	0.999	3475	tags=37%, list=12%, signal=42%
YoungHSCe_vs_AgedHSCe	CREIGHTON_ENDOCRINE_THERAPY_RESISTANCE_5	424	-0.32664	-1.76616	0	0.0133363	0.999	3252	tags=23%, list=11%, signal=25%
YoungHSCe_vs_AgedHSCe	IVANOVA_HEMATOPOIESIS_MATURE_CELL	261	-0.346127	-1.76566	0	0.0133762	0.999	3760	tags=31%, list=13%, signal=36%
YoungHSCe_vs_AgedHSCe	DING_LUNG_CANCER_EXPRESSION_BY_COPY_NUMBER	99	-0.399234	-1.76543	0.00190476	0.0133708	0.999	3345	tags=29%, list=11%, signal=33%
YoungHSCe_vs_AgedHSCe	LIU_CMYB_TARGETS_UP	147	-0.370234	-1.76507	0	0.0134058	0.999	2872	tags=24%, list=10%, signal=26%
YoungHSCe_vs_AgedHSCe	REACTOME_CLEAVAGE_OF_GROWING_TRANSCRIPT_IN_THE_TERMINATION_REGION_	42	-0.475707	-1.76422	0.00389105	0.013508	0.999	2663	tags=36%, list=9%, signal=39%
YoungHSCe_vs_AgedHSCe	KEGG_ACUTE_MYELOID_LEUKEMIA	57	-0.446978	-1.7627	0.00193798	0.0136618	0.999	2938	tags=35%, list=10%, signal=39%
YoungHSCe_vs_AgedHSCe	RICKMAN_TUMOR_DIFFERENTIATED_WELL_VS_POORLY_DN	314	-0.337315	-1.76267	0	0.0136402	0.999	3768	tags=26%, list=13%, signal=30%
YoungHSCe_vs_AgedHSCe	GROSS_HYPOXIA_VIA_ELK3_DN	144	-0.377312	-1.76214	0	0.013692	0.999	3535	tags=31%, list=12%, signal=34%
YoungHSCe_vs_AgedHSCe	PID_MTOR_4PATHWAY	69	-0.424987	-1.76172	0	0.0137084	0.999	3228	tags=33%, list=11%, signal=37%
YoungHSCe_vs_AgedHSCe	REACTOME_DESTABILIZATION_OF_MRNA_BY_BRF1	17	-0.602952	-1.76143	0.00980392	0.0137134	0.999	2294	tags=41%, list=8%, signal=45%
YoungHSCe_vs_AgedHSCe	MURAKAMI_UV_RESPONSE_6HR_UP	29	-0.509333	-1.76109	0.00813008	0.0137295	0.999	3741	tags=41%, list=13%, signal=47%
YoungHSCe_vs_AgedHSCe	IIZUKA_LIVER_CANCER_PROGRESSION_L0_L1_DN	21	-0.569432	-1.76026	0	0.0137944	0.999	3349	tags=48%, list=11%, signal=54%
YoungHSCe_vs_AgedHSCe	CHIANG_LIVER_CANCER_SUBCLASS_UNANNOTATED_DN	185	-0.360211	-1.75982	0	0.0138301	0.999	3700	tags=29%, list=12%, signal=33%
YoungHSCe_vs_AgedHSCe	KIM_ALL_DISORDERS_DURATION_CORR_DN	137	-0.378898	-1.75971	0.00187617	0.013815	0.999	3057	tags=24%, list=10%, signal=27%
YoungHSCe_vs_AgedHSCe	BOYLAN_MULTIPLE_MYELOMA_D_DN	72	-0.429119	-1.75939	0.00393701	0.0138307	0.999	3577	tags=31%, list=12%, signal=35%
YoungHSCe_vs_AgedHSCe	BILD_CTNNB1_ONCOGENIC_SIGNATURE	74	-0.420067	-1.75931	0.00185529	0.0138092	0.999	1992	tags=24%, list=7%, signal=26%
YoungHSCe_vs_AgedHSCe	ABE_VEGFA_TARGETS_2HR	28	-0.517221	-1.75781	0.00389105	0.0140071	0.999	4650	tags=39%, list=16%, signal=46%
YoungHSCe_vs_AgedHSCe	MA_MYELOID_DIFFERENTIATION_UP	36	-0.493262	-1.75754	0.00193798	0.0140245	0.999	3831	tags=47%, list=13%, signal=54%
YoungHSCe_vs_AgedHSCe	YAO_TEMPORAL_RESPONSE_TO_PROGESTERONE_CLUSTER_9	62	-0.434497	-1.75716	0.00191939	0.0140622	0.999	3237	tags=32%, list=11%, signal=36%
YoungHSCe_vs_AgedHSCe	BRUECKNER_TARGETS_OF_MIRLET7A3_DN	65	-0.427293	-1.75708	0.0038835	0.0140404	0.999	3703	tags=31%, list=12%, signal=35%
YoungHSCe_vs_AgedHSCe	REACTOME_SIGNALING_BY_CONSTITUTIVELY_ACTIVE_EGFR	17	-0.602688	-1.75536	0.00378072	0.0142694	0.999	2917	tags=47%, list=10%, signal=52%
YoungHSCe_vs_AgedHSCe	TONKS_TARGETS_OF_RUNX1_RUNX1T1_FUSION_HSC_UP	169	-0.362958	-1.75483	0	0.0143059	0.999	3397	tags=28%, list=11%, signal=31%
YoungHSCe_vs_AgedHSCe	WANG_CISPLATIN_RESPONSE_AND_XPC_DN	213	-0.351427	-1.75248	0	0.0146177	0.999	3786	tags=31%, list=13%, signal=35%
YoungHSCe_vs_AgedHSCe	FOURNIER_ACINAR_DEVELOPMENT_LATE_2	264	-0.340248	-1.75205	0	0.0146536	0.999	3160	tags=23%, list=11%, signal=25%
YoungHSCe_vs_AgedHSCe	AMIT_EGF_RESPONSE_480_HELA	150	-0.36572	-1.75104	0	0.0147861	0.999	3531	tags=31%, list=12%, signal=35%
YoungHSCe_vs_AgedHSCe	BAELDE_DIABETIC_NEPHROPATHY_DN	405	-0.326844	-1.75098	0	0.0147675	0.999	3364	tags=24%, list=11%, signal=27%
YoungHSCe_vs_AgedHSCe	PID_ER_NONGENOMIC_PATHWAY	40	-0.476229	-1.75082	0.00567108	0.0147685	0.999	2449	tags=30%, list=8%, signal=33%
YoungHSCe_vs_AgedHSCe	PID_S1P_S1P2_PATHWAY	23	-0.551227	-1.75046	0.00779727	0.0147735	0.999	2254	tags=39%, list=8%, signal=42%
YoungHSCe_vs_AgedHSCe	HEDENFALK_BREAST_CANCER_BRACX_UP	19	-0.572482	-1.74973	0.00757576	0.0148558	0.999	3679	tags=42%, list=12%, signal=48%
YoungHSCe_vs_AgedHSCe	BYSTRYKH_HEMATOPOIESIS_STEM_CELL_QTL_CIS	109	-0.388773	-1.74935	0.00182482	0.0148909	0.999	2697	tags=28%, list=9%, signal=30%
YoungHSCe_vs_AgedHSCe	JIANG_TIP30_TARGETS_DN	19	-0.582536	-1.74868	0.0133843	0.0149621	0.999	1606	tags=32%, list=5%, signal=33%
YoungHSCe_vs_AgedHSCe	PID_SMAD2_3NUCLEAR_PATHWAY	75	-0.419877	-1.74766	0.0036036	0.0151073	0.999	2143	tags=28%, list=7%, signal=30%
YoungHSCe_vs_AgedHSCe	REACTOME_NGF_SIGNALLING_VIA_TRKA_FROM_THE_PLASMA_MEMBRANE	127	-0.378911	-1.7473	0	0.0151502	0.999	3393	tags=28%, list=11%, signal=32%
YoungHSCe_vs_AgedHSCe	BROWNE_HCMV_INFECTION_14HR_UP	148	-0.374316	-1.74667	0	0.0151991	0.999	2784	tags=27%, list=9%, signal=30%
YoungHSCe_vs_AgedHSCe	REACTOME_TRANSPORT_OF_MATURE_TRANSCRIPT_TO_CYTOPLASM	52	-0.445702	-1.74596	0	0.0152924	0.999	3187	tags=40%, list=11%, signal=45%
YoungHSCe_vs_AgedHSCe	AMIT_EGF_RESPONSE_40_HELA	40	-0.475474	-1.74596	0.00372439	0.0152648	0.999	3218	tags=40%, list=11%, signal=45%
YoungHSCe_vs_AgedHSCe	REACTOME_PERK_REGULATED_GENE_EXPRESSION	26	-0.528001	-1.74511	0.00808081	0.015366	0.999	2658	tags=35%, list=9%, signal=38%
YoungHSCe_vs_AgedHSCe	MARTINEZ_TP53_TARGETS_DN	494	-0.318701	-1.74429	0	0.0154459	0.999	3768	tags=25%, list=13%, signal=28%
YoungHSCe_vs_AgedHSCe	PID_NFKAPPAB_CANONICAL_PATHWAY	23	-0.550434	-1.74319	0.0037594	0.0155762	0.999	1992	tags=39%, list=7%, signal=42%
YoungHSCe_vs_AgedHSCe	COULOUARN_TEMPORAL_TGFB1_SIGNATURE_UP	100	-0.397778	-1.74292	0	0.0155988	0.999	2604	tags=25%, list=9%, signal=27%
YoungHSCe_vs_AgedHSCe	DELACROIX_RAR_BOUND_ES	393	-0.326378	-1.74285	0	0.0155814	0.999	3561	tags=23%, list=12%, signal=25%
YoungHSCe_vs_AgedHSCe	SESTO_RESPONSE_TO_UV_C2	51	-0.444148	-1.74229	0.00919118	0.0156525	0.999	3417	tags=33%, list=11%, signal=38%
YoungHSCe_vs_AgedHSCe	BIOCARTA_CDC42RAC_PATHWAY	16	-0.610204	-1.74103	0.0115385	0.0158151	0.999	3454	tags=50%, list=12%, signal=57%
YoungHSCe_vs_AgedHSCe	DAIRKEE_TERT_TARGETS_UP	338	-0.331354	-1.7409	0	0.0157912	0.999	3700	tags=27%, list=12%, signal=30%
YoungHSCe_vs_AgedHSCe	SATO_SILENCED_EPIGENETICALLY_IN_PANCREATIC_CANCER	34	-0.4944	-1.73954	0.00192678	0.0159652	0.999	4650	tags=32%, list=16%, signal=38%
YoungHSCe_vs_AgedHSCe	SHEPARD_BMYB_MORPHOLINO_UP	189	-0.357129	-1.73916	0	0.0160101	0.999	3498	tags=26%, list=12%, signal=30%
YoungHSCe_vs_AgedHSCe	BOSCO_ALLERGEN_INDUCED_TH2_ASSOCIATED_MODULE	134	-0.376284	-1.73909	0.00176678	0.0159942	0.999	1891	tags=20%, list=6%, signal=21%
YoungHSCe_vs_AgedHSCe	NIKOLSKY_BREAST_CANCER_8Q12_Q22_AMPLICON	106	-0.388049	-1.73753	0	0.0162018	0.999	2140	tags=19%, list=7%, signal=20%
YoungHSCe_vs_AgedHSCe	HORTON_SREBF_TARGETS	24	-0.535489	-1.73631	0.00367647	0.01638	1	2012	tags=25%, list=7%, signal=27%
YoungHSCe_vs_AgedHSCe	KEGG_ENDOMETRIAL_CANCER	51	-0.451273	-1.73534	0.00596422	0.0165013	1	2242	tags=27%, list=8%, signal=30%
YoungHSCe_vs_AgedHSCe	SCHLOSSER_MYC_TARGETS_AND_SERUM_RESPONSE_DN	46	-0.459741	-1.73516	0.00194932	0.0165094	1	2674	tags=30%, list=9%, signal=33%
YoungHSCe_vs_AgedHSCe	LAIHO_COLORECTAL_CANCER_SERRATED_DN	78	-0.411299	-1.73438	0	0.0165835	1	2977	tags=28%, list=10%, signal=31%
YoungHSCe_vs_AgedHSCe	DAZARD_UV_RESPONSE_CLUSTER_G24	21	-0.553751	-1.73414	0.0116959	0.0165852	1	1241	tags=24%, list=4%, signal=25%
YoungHSCe_vs_AgedHSCe	PID_PI3KCI_PATHWAY	49	-0.445781	-1.73373	0.00382409	0.0166116	1	2917	tags=31%, list=10%, signal=34%
YoungHSCe_vs_AgedHSCe	HUI_MAPK14_TARGETS_UP	20	-0.563979	-1.73206	0.0120968	0.0168484	1	2936	tags=40%, list=10%, signal=44%
YoungHSCe_vs_AgedHSCe	REACTOME_LATE_PHASE_OF_HIV_LIFE_CYCLE	96	-0.396124	-1.73204	0.00184843	0.016819	1	2885	tags=32%, list=10%, signal=36%
YoungHSCe_vs_AgedHSCe	AMIT_SERUM_RESPONSE_60_MCF10A	55	-0.438354	-1.72906	0.0018622	0.0172509	1	2298	tags=27%, list=8%, signal=29%
YoungHSCe_vs_AgedHSCe	WINTER_HYPOXIA_METAGENE	208	-0.346732	-1.72851	0	0.0173021	1	3922	tags=29%, list=13%, signal=33%
YoungHSCe_vs_AgedHSCe	LUI_THYROID_CANCER_PAX8_PPARG_DN	44	-0.459935	-1.72786	0.00392927	0.01742	1	4523	tags=43%, list=15%, signal=51%
YoungHSCe_vs_AgedHSCe	REACTOME_MITOTIC_G1_G1_S_PHASES	130	-0.375853	-1.72658	0	0.0176177	1	3786	tags=30%, list=13%, signal=34%
YoungHSCe_vs_AgedHSCe	TAVOR_CEBPA_TARGETS_UP	44	-0.465872	-1.72563	0.0020284	0.017759	1	4038	tags=39%, list=14%, signal=45%
YoungHSCe_vs_AgedHSCe	GRYDER_PAX3FOXO1_TOP_ENHANCERS	417	-0.320792	-1.72461	0	0.017886	1	3417	tags=24%, list=11%, signal=27%
YoungHSCe_vs_AgedHSCe	RIZKI_TUMOR_INVASIVENESS_2D_DN	56	-0.435923	-1.72452	0.00756144	0.0178552	1	2503	tags=32%, list=8%, signal=35%
YoungHSCe_vs_AgedHSCe	PASQUALUCCI_LYMPHOMA_BY_GC_STAGE_DN	149	-0.366774	-1.72401	0	0.0179174	1	3123	tags=26%, list=10%, signal=28%
YoungHSCe_vs_AgedHSCe	TERAO_AOX4_TARGETS_HG_UP	28	-0.505508	-1.72313	0.00374532	0.0180351	1	2338	tags=36%, list=8%, signal=39%
YoungHSCe_vs_AgedHSCe	ST_P38_MAPK_PATHWAY	37	-0.477345	-1.72138	0.00198413	0.0183093	1	1391	tags=32%, list=5%, signal=34%
YoungHSCe_vs_AgedHSCe	SEKI_INFLAMMATORY_RESPONSE_LPS_UP	71	-0.41495	-1.71924	0.00185874	0.0185968	1	3601	tags=32%, list=12%, signal=37%
YoungHSCe_vs_AgedHSCe	YAGI_AML_WITH_T_8_21_TRANSLOCATION	335	-0.324491	-1.71754	0	0.0188488	1	3788	tags=27%, list=13%, signal=30%
YoungHSCe_vs_AgedHSCe	DEMAGALHAES_AGING_DN	15	-0.611771	-1.71754	0.00813008	0.0188167	1	2757	tags=33%, list=9%, signal=37%
YoungHSCe_vs_AgedHSCe	GARGALOVIC_RESPONSE_TO_OXIDIZED_PHOSPHOLIPIDS_YELLOW_UP	32	-0.487449	-1.71675	0.0165746	0.018932	1	3633	tags=38%, list=12%, signal=43%
YoungHSCe_vs_AgedHSCe	WANG_RESPONSE_TO_ANDROGEN_UP	26	-0.511845	-1.71573	0.0113422	0.0191074	1	2528	tags=35%, list=8%, signal=38%
YoungHSCe_vs_AgedHSCe	LIU_SOX4_TARGETS_DN	293	-0.328721	-1.71557	0	0.0190988	1	3622	tags=28%, list=12%, signal=32%
YoungHSCe_vs_AgedHSCe	DARWICHE_SKIN_TUMOR_PROMOTER_DN	152	-0.359898	-1.71306	0	0.0194534	1	3056	tags=27%, list=10%, signal=30%
YoungHSCe_vs_AgedHSCe	ST_DIFFERENTIATION_PATHWAY_IN_PC12_CELLS	40	-0.472664	-1.71252	0.00833333	0.0195332	1	1977	tags=33%, list=7%, signal=35%
YoungHSCe_vs_AgedHSCe	RAMALHO_STEMNESS_UP	200	-0.351011	-1.71173	0	0.0196525	1	3188	tags=26%, list=11%, signal=29%
YoungHSCe_vs_AgedHSCe	THUM_SYSTOLIC_HEART_FAILURE_UP	366	-0.322303	-1.71117	0	0.0197142	1	3555	tags=23%, list=12%, signal=26%
YoungHSCe_vs_AgedHSCe	VANTVEER_BREAST_CANCER_METASTASIS_DN	112	-0.377963	-1.71105	0	0.0197145	1	3110	tags=21%, list=10%, signal=24%
YoungHSCe_vs_AgedHSCe	SIG_CD40PATHWAYMAP	34	-0.484743	-1.71082	0.00779727	0.0197187	1	2211	tags=35%, list=7%, signal=38%
YoungHSCe_vs_AgedHSCe	OSADA_ASCL1_TARGETS_DN	18	-0.573657	-1.71	0.016129	0.0198389	1	4315	tags=44%, list=14%, signal=52%
YoungHSCe_vs_AgedHSCe	FAELT_B_CLL_WITH_VH_REARRANGEMENTS_DN	45	-0.448446	-1.70995	0.00355872	0.0198135	1	3034	tags=36%, list=10%, signal=40%
YoungHSCe_vs_AgedHSCe	SENGUPTA_NASOPHARYNGEAL_CARCINOMA_WITH_LMP1_UP	348	-0.3251	-1.70972	0	0.0198101	1	3491	tags=25%, list=12%, signal=28%
YoungHSCe_vs_AgedHSCe	NUTT_GBM_VS_AO_GLIOMA_DN	40	-0.469901	-1.70956	0.00968992	0.0197966	1	3425	tags=40%, list=11%, signal=45%
YoungHSCe_vs_AgedHSCe	DAZARD_RESPONSE_TO_UV_NHEK_DN	301	-0.327701	-1.70835	0	0.0199629	1	2856	tags=24%, list=10%, signal=27%
YoungHSCe_vs_AgedHSCe	MATSUDA_NATURAL_KILLER_DIFFERENTIATION	419	-0.316904	-1.70797	0	0.0200075	1	3952	tags=25%, list=13%, signal=28%
YoungHSCe_vs_AgedHSCe	BIOCARTA_RACCYCD_PATHWAY	26	-0.511039	-1.70795	0.00775194	0.0199783	1	2254	tags=38%, list=8%, signal=42%
YoungHSCe_vs_AgedHSCe	REACTOME_THROMBOXANE_SIGNALLING_THROUGH_TP_RECEPTOR	19	-0.558874	-1.70784	0.0140562	0.0199724	1	7161	tags=53%, list=24%, signal=69%
YoungHSCe_vs_AgedHSCe	STARK_PREFRONTAL_CORTEX_22Q11_DELETION_UP	183	-0.3502	-1.70728	0	0.0200558	1	3785	tags=30%, list=13%, signal=34%
YoungHSCe_vs_AgedHSCe	RIZ_ERYTHROID_DIFFERENTIATION_CCNE1	38	-0.475251	-1.70656	0.00590551	0.0201446	1	2190	tags=26%, list=7%, signal=28%
YoungHSCe_vs_AgedHSCe	NOUZOVA_TRETINOIN_AND_H4_ACETYLATION	134	-0.363822	-1.70624	0	0.0201734	1	3708	tags=32%, list=12%, signal=36%
YoungHSCe_vs_AgedHSCe	CHIBA_RESPONSE_TO_TSA_DN	23	-0.532819	-1.70483	0.0102669	0.0203929	1	3356	tags=35%, list=11%, signal=39%
YoungHSCe_vs_AgedHSCe	IVANOVA_HEMATOPOIESIS_STEM_CELL	225	-0.337078	-1.70472	0	0.0203804	1	3102	tags=24%, list=10%, signal=27%
YoungHSCe_vs_AgedHSCe	HUTTMANN_B_CLL_POOR_SURVIVAL_UP	247	-0.333685	-1.70364	0	0.0205412	1	3593	tags=26%, list=12%, signal=29%
YoungHSCe_vs_AgedHSCe	KAAB_FAILED_HEART_VENTRICLE_DN	34	-0.490264	-1.70031	0.00714286	0.0211811	1	2758	tags=32%, list=9%, signal=36%
YoungHSCe_vs_AgedHSCe	GAUSSMANN_MLL_AF4_FUSION_TARGETS_A_UP	165	-0.35529	-1.69874	0	0.0214011	1	3689	tags=27%, list=12%, signal=31%
YoungHSCe_vs_AgedHSCe	TONKS_TARGETS_OF_RUNX1_RUNX1T1_FUSION_MONOCYTE_DN	46	-0.438406	-1.69706	0.0117878	0.0216856	1	3860	tags=35%, list=13%, signal=40%
YoungHSCe_vs_AgedHSCe	MARTINEZ_RESPONSE_TO_TRABECTEDIN_UP	66	-0.412083	-1.69661	0.00380952	0.0217498	1	3213	tags=27%, list=11%, signal=30%
YoungHSCe_vs_AgedHSCe	GROSS_HYPOXIA_VIA_HIF1A_DN	97	-0.38631	-1.69649	0	0.0217335	1	3989	tags=30%, list=13%, signal=34%
YoungHSCe_vs_AgedHSCe	SCHLOSSER_MYC_TARGETS_AND_SERUM_RESPONSE_UP	46	-0.447207	-1.69634	0.00389105	0.0217362	1	1387	tags=22%, list=5%, signal=23%
YoungHSCe_vs_AgedHSCe	NIKOLSKY_BREAST_CANCER_8P12_P11_AMPLICON	41	-0.456157	-1.69581	0.00604839	0.0218112	1	3206	tags=27%, list=11%, signal=30%
YoungHSCe_vs_AgedHSCe	MANTOVANI_VIRAL_GPCR_SIGNALING_DN	42	-0.456353	-1.69475	0.00552486	0.0219964	1	4059	tags=33%, list=14%, signal=39%
YoungHSCe_vs_AgedHSCe	CHNG_MULTIPLE_MYELOMA_HYPERPLOID_DN	27	-0.512028	-1.69382	0.0094162	0.022133	1	2771	tags=33%, list=9%, signal=37%
YoungHSCe_vs_AgedHSCe	WIERENGA_PML_INTERACTOME	39	-0.463467	-1.69156	0.0095057	0.0225309	1	3859	tags=49%, list=13%, signal=56%
YoungHSCe_vs_AgedHSCe	SHETH_LIVER_CANCER_VS_TXNIP_LOSS_PAM1	203	-0.344131	-1.69004	0	0.0227906	1	3090	tags=21%, list=10%, signal=23%
YoungHSCe_vs_AgedHSCe	HOSHIDA_LIVER_CANCER_LATE_RECURRENCE_UP	50	-0.445211	-1.68948	0.00567108	0.0228594	1	2382	tags=28%, list=8%, signal=30%
YoungHSCe_vs_AgedHSCe	BOCHKIS_FOXA2_TARGETS	365	-0.319992	-1.68917	0	0.0228849	1	3805	tags=26%, list=13%, signal=29%
YoungHSCe_vs_AgedHSCe	BIOCARTA_AKT_PATHWAY	21	-0.544838	-1.68886	0.0210325	0.0229232	1	3616	tags=38%, list=12%, signal=43%
YoungHSCe_vs_AgedHSCe	CHARAFE_BREAST_CANCER_LUMINAL_VS_MESENCHYMAL_DN	424	-0.3147	-1.68793	0	0.0231103	1	3623	tags=21%, list=12%, signal=24%
YoungHSCe_vs_AgedHSCe	LIU_VMYB_TARGETS_UP	113	-0.372376	-1.68695	0.00178253	0.0232812	1	3692	tags=27%, list=12%, signal=31%
YoungHSCe_vs_AgedHSCe	SENESE_HDAC1_AND_HDAC2_TARGETS_UP	200	-0.340626	-1.68535	0	0.0235624	1	3449	tags=29%, list=12%, signal=33%
YoungHSCe_vs_AgedHSCe	GROSS_HIF1A_TARGETS_DN	21	-0.55313	-1.6851	0.0159681	0.0235638	1	4076	tags=48%, list=14%, signal=55%
YoungHSCe_vs_AgedHSCe	BAE_BRCA1_TARGETS_UP	70	-0.402112	-1.6843	0.00196464	0.0236791	1	3677	tags=30%, list=12%, signal=34%
YoungHSCe_vs_AgedHSCe	BURTON_ADIPOGENESIS_11	53	-0.437647	-1.68428	0.00190476	0.023649	1	2396	tags=32%, list=8%, signal=35%
YoungHSCe_vs_AgedHSCe	MCBRYAN_PUBERTAL_BREAST_3_4WK_DN	33	-0.4893	-1.68333	0.0115607	0.0238066	1	3347	tags=33%, list=11%, signal=38%
YoungHSCe_vs_AgedHSCe	ALCALA_APOPTOSIS	82	-0.393433	-1.68224	0	0.0239885	1	3601	tags=33%, list=12%, signal=37%
YoungHSCe_vs_AgedHSCe	REACTOME_ACTIVATION_OF_GENES_BY_ATF4	23	-0.521104	-1.68196	0.0110906	0.0240193	1	2658	tags=30%, list=9%, signal=33%
YoungHSCe_vs_AgedHSCe	HOFFMANN_PRE_BI_TO_LARGE_PRE_BII_LYMPHOCYTE_DN	72	-0.407997	-1.68142	0.00184502	0.0240776	1	2616	tags=24%, list=9%, signal=26%
YoungHSCe_vs_AgedHSCe	REACTOME_TRANS_GOLGI_NETWORK_VESICLE_BUDDING	54	-0.432795	-1.68095	0.00743494	0.0241099	1	2270	tags=30%, list=8%, signal=32%
YoungHSCe_vs_AgedHSCe	REACTOME_P75_NTR_RECEPTOR_MEDIATED_SIGNALLING	75	-0.402325	-1.68038	0.00383877	0.0242031	1	2876	tags=33%, list=10%, signal=37%
YoungHSCe_vs_AgedHSCe	KAN_RESPONSE_TO_ARSENIC_TRIOXIDE	100	-0.380539	-1.68013	0.00367647	0.0242183	1	2610	tags=24%, list=9%, signal=26%
YoungHSCe_vs_AgedHSCe	REACTOME_DOWNSTREAM_TCR_SIGNALING	30	-0.491294	-1.68004	0.0100806	0.0242039	1	3616	tags=37%, list=12%, signal=42%
YoungHSCe_vs_AgedHSCe	BIOCARTA_HCMV_PATHWAY	17	-0.572262	-1.67973	0.0139442	0.024223	1	1977	tags=41%, list=7%, signal=44%
YoungHSCe_vs_AgedHSCe	WANG_SMARCE1_TARGETS_DN	331	-0.321168	-1.67862	0	0.0244087	1	3629	tags=25%, list=12%, signal=28%
YoungHSCe_vs_AgedHSCe	YAO_TEMPORAL_RESPONSE_TO_PROGESTERONE_CLUSTER_10	65	-0.407981	-1.67777	0.00759013	0.0245759	1	3280	tags=28%, list=11%, signal=31%
YoungHSCe_vs_AgedHSCe	SUZUKI_RESPONSE_TO_TSA_AND_DECITABINE_1B	15	-0.591255	-1.6776	0.011194	0.0245667	1	1937	tags=27%, list=6%, signal=29%
YoungHSCe_vs_AgedHSCe	NATSUME_RESPONSE_TO_INTERFERON_BETA_UP	62	-0.417655	-1.67703	0.00177936	0.0246358	1	2514	tags=26%, list=8%, signal=28%
YoungHSCe_vs_AgedHSCe	KIM_WT1_TARGETS_12HR_DN	188	-0.346261	-1.67682	0.00180832	0.0246355	1	3601	tags=28%, list=12%, signal=31%
YoungHSCe_vs_AgedHSCe	ZHANG_BREAST_CANCER_PROGENITORS_UP	403	-0.312128	-1.6765	0	0.0246683	1	2996	tags=22%, list=10%, signal=24%
YoungHSCe_vs_AgedHSCe	KYNG_DNA_DAMAGE_DN	181	-0.348565	-1.67636	0	0.024663	1	3221	tags=26%, list=11%, signal=29%
YoungHSCe_vs_AgedHSCe	MACLACHLAN_BRCA1_TARGETS_UP	20	-0.547318	-1.67609	0.0174081	0.0246827	1	3850	tags=55%, list=13%, signal=63%
YoungHSCe_vs_AgedHSCe	KEGG_CITRATE_CYCLE_TCA_CYCLE	28	-0.498482	-1.67601	0.00733945	0.024668	1	2962	tags=36%, list=10%, signal=40%
YoungHSCe_vs_AgedHSCe	MATZUK_SPERMATOCYTE	66	-0.408557	-1.67573	0.00570342	0.0246879	1	2581	tags=24%, list=9%, signal=26%
YoungHSCe_vs_AgedHSCe	NIELSEN_MALIGNAT_FIBROUS_HISTIOCYTOMA_DN	16	-0.56589	-1.67531	0.0116054	0.0247365	1	3646	tags=44%, list=12%, signal=50%
YoungHSCe_vs_AgedHSCe	PID_ERBB1_DOWNSTREAM_PATHWAY	105	-0.379903	-1.67496	0.00191571	0.0247795	1	3454	tags=34%, list=12%, signal=39%
YoungHSCe_vs_AgedHSCe	TIAN_TNF_SIGNALING_NOT_VIA_NFKB	20	-0.540568	-1.67339	0.0204082	0.0250695	1	3204	tags=45%, list=11%, signal=50%
YoungHSCe_vs_AgedHSCe	NING_CHRONIC_OBSTRUCTIVE_PULMONARY_DISEASE_UP	140	-0.355205	-1.67309	0	0.0250922	1	3760	tags=29%, list=13%, signal=33%
YoungHSCe_vs_AgedHSCe	YORDY_RECIPROCAL_REGULATION_BY_ETS1_AND_SP100_UP	21	-0.533259	-1.67218	0.0130841	0.0252406	1	4340	tags=38%, list=15%, signal=45%
YoungHSCe_vs_AgedHSCe	UDAYAKUMAR_MED1_TARGETS_UP	132	-0.363087	-1.67159	0	0.0253198	1	2832	tags=23%, list=9%, signal=26%
YoungHSCe_vs_AgedHSCe	ROESSLER_LIVER_CANCER_METASTASIS_DN	47	-0.439534	-1.67142	0.00574713	0.0253062	1	2376	tags=30%, list=8%, signal=32%
YoungHSCe_vs_AgedHSCe	SCHLINGEMANN_SKIN_CARCINOGENESIS_TPA_UP	29	-0.511358	-1.67112	0.0094162	0.0253515	1	1748	tags=31%, list=6%, signal=33%
YoungHSCe_vs_AgedHSCe	ZHENG_FOXP3_TARGETS_UP	25	-0.51147	-1.67066	0.020284	0.0254022	1	1399	tags=24%, list=5%, signal=25%
YoungHSCe_vs_AgedHSCe	WALLACE_PROSTATE_CANCER_UP	19	-0.550537	-1.6706	0.0234834	0.0253744	1	2012	tags=32%, list=7%, signal=34%
YoungHSCe_vs_AgedHSCe	REACTOME_TAK1_ACTIVATES_NFKB_BY_PHOSPHORYLATION_AND_ACTIVATION_OF_IKKS_COMPLEX	22	-0.529524	-1.67023	0.018797	0.0254124	1	1900	tags=32%, list=6%, signal=34%
YoungHSCe_vs_AgedHSCe	WANG_RECURRENT_LIVER_CANCER_DN	15	-0.586723	-1.66891	0.0189036	0.025656	1	6987	tags=53%, list=23%, signal=70%
YoungHSCe_vs_AgedHSCe	KEGG_MELANOMA	60	-0.420001	-1.66885	0.00568182	0.0256386	1	2242	tags=25%, list=8%, signal=27%
YoungHSCe_vs_AgedHSCe	BYSTRYKH_HEMATOPOIESIS_STEM_CELL_AND_BRAIN_QTL_TRANS	168	-0.344634	-1.6669	0	0.0260438	1	2295	tags=20%, list=8%, signal=21%
YoungHSCe_vs_AgedHSCe	DAZARD_RESPONSE_TO_UV_SCC_UP	114	-0.370838	-1.66682	0	0.026017	1	3481	tags=32%, list=12%, signal=36%
YoungHSCe_vs_AgedHSCe	WANG_ESOPHAGUS_CANCER_VS_NORMAL_UP	104	-0.375274	-1.66648	0.00359066	0.0260713	1	2795	tags=21%, list=9%, signal=23%
YoungHSCe_vs_AgedHSCe	IKEDA_MIR1_TARGETS_UP	52	-0.432682	-1.66603	0.00191571	0.0261255	1	3632	tags=40%, list=12%, signal=46%
YoungHSCe_vs_AgedHSCe	SCHLOSSER_SERUM_RESPONSE_UP	123	-0.367634	-1.66603	0	0.0260881	1	2530	tags=24%, list=8%, signal=27%
YoungHSCe_vs_AgedHSCe	PID_MET_PATHWAY	79	-0.390807	-1.66599	0.00579151	0.0260543	1	3454	tags=33%, list=12%, signal=37%
YoungHSCe_vs_AgedHSCe	GINESTIER_BREAST_CANCER_20Q13_AMPLIFICATION_UP	108	-0.3714	-1.66562	0	0.0260907	1	3552	tags=30%, list=12%, signal=34%
YoungHSCe_vs_AgedHSCe	REACTOME_CD28_CO_STIMULATION	31	-0.492605	-1.66092	0.0117188	0.0270647	1	3228	tags=29%, list=11%, signal=33%
YoungHSCe_vs_AgedHSCe	GENTILE_UV_RESPONSE_CLUSTER_D5	35	-0.468577	-1.66047	0.0156863	0.0271309	1	3540	tags=43%, list=12%, signal=49%
YoungHSCe_vs_AgedHSCe	LEI_MYB_TARGETS	277	-0.322625	-1.66025	0	0.0271431	1	3325	tags=24%, list=11%, signal=27%
YoungHSCe_vs_AgedHSCe	BROWNE_HCMV_INFECTION_10HR_UP	90	-0.382235	-1.65999	0.00369686	0.0271656	1	2854	tags=27%, list=10%, signal=29%
YoungHSCe_vs_AgedHSCe	GRYDER_PAX3FOXO1_ENHANCERS_KO_DOWN	403	-0.310588	-1.65969	0	0.027188	1	3552	tags=23%, list=12%, signal=26%
YoungHSCe_vs_AgedHSCe	SHAFFER_IRF4_TARGETS_IN_ACTIVATED_B_LYMPHOCYTE	78	-0.387203	-1.65925	0	0.027233	1	2528	tags=22%, list=8%, signal=24%
YoungHSCe_vs_AgedHSCe	PID_ERBB1_INTERNALIZATION_PATHWAY	40	-0.457139	-1.65912	0.00769231	0.027217	1	2602	tags=33%, list=9%, signal=36%
YoungHSCe_vs_AgedHSCe	GESERICK_TERT_TARGETS_DN	21	-0.532404	-1.65862	0.0142857	0.0273308	1	3204	tags=38%, list=11%, signal=43%
YoungHSCe_vs_AgedHSCe	REACTOME_G_BETA_GAMMA_SIGNALLING_THROUGH_PI3KGAMMA	22	-0.523611	-1.65856	0.0209924	0.0272956	1	7161	tags=50%, list=24%, signal=66%
YoungHSCe_vs_AgedHSCe	REACTOME_DOWNSTREAM_SIGNALING_OF_ACTIVATED_FGFR	87	-0.388071	-1.65754	0.00357782	0.0275283	1	2769	tags=23%, list=9%, signal=25%
YoungHSCe_vs_AgedHSCe	PID_WNT_CANONICAL_PATHWAY	19	-0.543226	-1.65718	0.0135397	0.0275862	1	2397	tags=42%, list=8%, signal=46%
YoungHSCe_vs_AgedHSCe	REACTOME_SIGNALING_BY_ILS	96	-0.381591	-1.65627	0.00386847	0.0277879	1	2802	tags=31%, list=9%, signal=34%
YoungHSCe_vs_AgedHSCe	ZWANG_EGF_INTERVAL_DN	183	-0.340675	-1.65449	0	0.0281987	1	3409	tags=26%, list=11%, signal=29%
YoungHSCe_vs_AgedHSCe	ZHANG_TARGETS_OF_EWSR1_FLI1_FUSION	80	-0.386418	-1.65329	0.00559702	0.0284287	1	3129	tags=28%, list=10%, signal=31%
YoungHSCe_vs_AgedHSCe	MARTINEZ_RB1_TARGETS_DN	447	-0.305978	-1.65306	0	0.0284434	1	3409	tags=22%, list=11%, signal=25%
YoungHSCe_vs_AgedHSCe	PECE_MAMMARY_STEM_CELL_DN	129	-0.356347	-1.65179	0	0.0286895	1	3468	tags=31%, list=12%, signal=35%
YoungHSCe_vs_AgedHSCe	ZHOU_TNF_SIGNALING_4HR	51	-0.429955	-1.65146	0.00375235	0.0287316	1	3481	tags=43%, list=12%, signal=49%
YoungHSCe_vs_AgedHSCe	KEGG_PATHOGENIC_ESCHERICHIA_COLI_INFECTION	52	-0.426014	-1.65146	0.00566038	0.0286897	1	3907	tags=31%, list=13%, signal=35%
YoungHSCe_vs_AgedHSCe	LINSLEY_MIR16_TARGETS	196	-0.334745	-1.65134	0	0.0286751	1	3734	tags=27%, list=13%, signal=30%
YoungHSCe_vs_AgedHSCe	ZHAN_MULTIPLE_MYELOMA_CD1_AND_CD2_UP	82	-0.381261	-1.6513	0	0.0286455	1	3696	tags=30%, list=12%, signal=35%
YoungHSCe_vs_AgedHSCe	BENPORATH_PROLIFERATION	137	-0.357429	-1.64994	0.00182815	0.0289064	1	3540	tags=24%, list=12%, signal=27%
YoungHSCe_vs_AgedHSCe	SWEET_KRAS_ONCOGENIC_SIGNATURE	83	-0.388177	-1.64989	0.00181818	0.028873	1	3498	tags=34%, list=12%, signal=38%
YoungHSCe_vs_AgedHSCe	ODONNELL_TFRC_TARGETS_UP	347	-0.312367	-1.64976	0	0.0288686	1	2953	tags=20%, list=10%, signal=21%
YoungHSCe_vs_AgedHSCe	IWANAGA_CARCINOGENESIS_BY_KRAS_UP	146	-0.351849	-1.64949	0	0.0288996	1	3213	tags=23%, list=11%, signal=26%
YoungHSCe_vs_AgedHSCe	BIOCARTA_CTLA4_PATHWAY	15	-0.584227	-1.6492	0.0137795	0.0289224	1	2613	tags=33%, list=9%, signal=37%
YoungHSCe_vs_AgedHSCe	CHICAS_RB1_TARGETS_LOW_SERUM	81	-0.392027	-1.6483	0.00555556	0.0291188	1	7704	tags=42%, list=26%, signal=56%
YoungHSCe_vs_AgedHSCe	KIM_WT1_TARGETS_12HR_UP	149	-0.347626	-1.64797	0.00181818	0.0291597	1	2946	tags=21%, list=10%, signal=23%
YoungHSCe_vs_AgedHSCe	WONG_EMBRYONIC_STEM_CELL_CORE	327	-0.316077	-1.64671	0	0.0294321	1	3575	tags=23%, list=12%, signal=26%
YoungHSCe_vs_AgedHSCe	BENPORATH_OCT4_TARGETS	257	-0.320993	-1.6465	0	0.0294437	1	3113	tags=25%, list=10%, signal=27%
YoungHSCe_vs_AgedHSCe	TOOKER_GEMCITABINE_RESISTANCE_UP	74	-0.388681	-1.64619	0	0.029474	1	3853	tags=35%, list=13%, signal=40%
YoungHSCe_vs_AgedHSCe	KAYO_AGING_MUSCLE_DN	117	-0.361775	-1.64576	0.00185185	0.0295555	1	3356	tags=29%, list=11%, signal=33%
YoungHSCe_vs_AgedHSCe	KEGG_T_CELL_RECEPTOR_SIGNALING_PATHWAY	93	-0.37003	-1.6457	0	0.0295217	1	3616	tags=32%, list=12%, signal=37%
YoungHSCe_vs_AgedHSCe	SETLUR_PROSTATE_CANCER_TMPRSS2_ERG_FUSION_UP	62	-0.411096	-1.64538	0	0.0295531	1	4039	tags=32%, list=14%, signal=37%
YoungHSCe_vs_AgedHSCe	BURTON_ADIPOGENESIS_PEAK_AT_2HR	48	-0.429464	-1.64515	0	0.0295628	1	3920	tags=35%, list=13%, signal=41%
YoungHSCe_vs_AgedHSCe	REACTOME_RNA_POL_II_PRE_TRANSCRIPTION_EVENTS	55	-0.419835	-1.64482	0.0115163	0.0295959	1	3494	tags=36%, list=12%, signal=41%
YoungHSCe_vs_AgedHSCe	LINDGREN_BLADDER_CANCER_WITH_LOH_IN_CHR9Q	109	-0.370107	-1.64395	0.00184843	0.0297587	1	2843	tags=28%, list=10%, signal=31%
YoungHSCe_vs_AgedHSCe	DAZARD_RESPONSE_TO_UV_NHEK_UP	208	-0.32979	-1.64323	0	0.0299093	1	3682	tags=29%, list=12%, signal=33%
YoungHSCe_vs_AgedHSCe	LUI_TARGETS_OF_PAX8_PPARG_FUSION	34	-0.472126	-1.64261	0.00531915	0.0300167	1	7397	tags=62%, list=25%, signal=82%
YoungHSCe_vs_AgedHSCe	CHIARETTI_ACUTE_LYMPHOBLASTIC_LEUKEMIA_ZAP70	60	-0.413592	-1.64077	0.00562852	0.0304227	1	3810	tags=35%, list=13%, signal=40%
YoungHSCe_vs_AgedHSCe	LIN_NPAS4_TARGETS_UP	143	-0.349715	-1.6406	0	0.0304229	1	3277	tags=24%, list=11%, signal=27%
YoungHSCe_vs_AgedHSCe	REACTOME_FORMATION_OF_RNA_POL_II_ELONGATION_COMPLEX_	39	-0.450052	-1.64058	0.0159363	0.0303884	1	2692	tags=36%, list=9%, signal=39%
YoungHSCe_vs_AgedHSCe	TOMIDA_METASTASIS_UP	23	-0.506166	-1.64027	0.0157791	0.030415	1	3481	tags=39%, list=12%, signal=44%
YoungHSCe_vs_AgedHSCe	LIN_APC_TARGETS	74	-0.39778	-1.64008	0	0.0304069	1	4643	tags=32%, list=16%, signal=38%
YoungHSCe_vs_AgedHSCe	SCHAEFFER_PROSTATE_DEVELOPMENT_AND_CANCER_BOX4_DN	32	-0.480892	-1.63998	0.0157171	0.0303891	1	1725	tags=34%, list=6%, signal=36%
YoungHSCe_vs_AgedHSCe	INGA_TP53_TARGETS	16	-0.568205	-1.63975	0.0287356	0.0303943	1	3449	tags=44%, list=12%, signal=49%
YoungHSCe_vs_AgedHSCe	MARKEY_RB1_ACUTE_LOF_UP	226	-0.330325	-1.63952	0	0.0303928	1	3481	tags=22%, list=12%, signal=25%
YoungHSCe_vs_AgedHSCe	KEGG_INSULIN_SIGNALING_PATHWAY	127	-0.357767	-1.63942	0.00542496	0.0303783	1	3493	tags=27%, list=12%, signal=30%
YoungHSCe_vs_AgedHSCe	YAMAZAKI_TCEB3_TARGETS_DN	191	-0.334946	-1.63905	0	0.0304107	1	3540	tags=23%, list=12%, signal=25%
YoungHSCe_vs_AgedHSCe	REACTOME_S_PHASE	106	-0.373541	-1.63901	0.00178253	0.0303765	1	2801	tags=27%, list=9%, signal=30%
YoungHSCe_vs_AgedHSCe	WANG_CISPLATIN_RESPONSE_AND_XPC_UP	175	-0.338362	-1.63881	0	0.0303864	1	3540	tags=23%, list=12%, signal=26%
YoungHSCe_vs_AgedHSCe	REACTOME_DOWNREGULATION_OF_SMAD2_3_SMAD4_TRANSCRIPTIONAL_ACTIVITY	19	-0.535399	-1.63868	0.011215	0.0303767	1	3637	tags=42%, list=12%, signal=48%
YoungHSCe_vs_AgedHSCe	JOHANSSON_GLIOMAGENESIS_BY_PDGFB_UP	57	-0.414837	-1.63839	0.00576923	0.0304094	1	3383	tags=30%, list=11%, signal=34%
YoungHSCe_vs_AgedHSCe	NAKAMURA_TUMOR_ZONE_PERIPHERAL_VS_CENTRAL_UP	259	-0.323428	-1.6378	0	0.0305051	1	3785	tags=24%, list=13%, signal=27%
YoungHSCe_vs_AgedHSCe	LEE_CALORIE_RESTRICTION_MUSCLE_UP	32	-0.467703	-1.63757	0.00967118	0.0305246	1	3530	tags=38%, list=12%, signal=42%
YoungHSCe_vs_AgedHSCe	STEIN_ESTROGEN_RESPONSE_NOT_VIA_ESRRA	16	-0.565974	-1.63683	0.0302457	0.0306461	1	3127	tags=31%, list=10%, signal=35%
YoungHSCe_vs_AgedHSCe	SUNG_METASTASIS_STROMA_UP	101	-0.361583	-1.63634	0.00601202	0.0307171	1	2712	tags=22%, list=9%, signal=24%
YoungHSCe_vs_AgedHSCe	SESTO_RESPONSE_TO_UV_C6	35	-0.45878	-1.63622	0.0147874	0.0306941	1	3498	tags=37%, list=12%, signal=42%
YoungHSCe_vs_AgedHSCe	MILI_PSEUDOPODIA_CHEMOTAXIS_UP	68	-0.402996	-1.63621	0.00750469	0.0306551	1	3677	tags=35%, list=12%, signal=40%
YoungHSCe_vs_AgedHSCe	PID_IGF1_PATHWAY	30	-0.477631	-1.63598	0.0123203	0.0306516	1	2938	tags=30%, list=10%, signal=33%
YoungHSCe_vs_AgedHSCe	KRIGE_AMINO_ACID_DEPRIVATION	26	-0.503983	-1.635	0.0150376	0.0308411	1	3662	tags=38%, list=12%, signal=44%
YoungHSCe_vs_AgedHSCe	REACTOME_NETRIN1_SIGNALING	29	-0.479338	-1.63481	0.0227273	0.030831	1	4016	tags=45%, list=13%, signal=52%
YoungHSCe_vs_AgedHSCe	PUJANA_XPRSS_INT_NETWORK	166	-0.344045	-1.63478	0.00181818	0.0307936	1	3728	tags=26%, list=12%, signal=29%
YoungHSCe_vs_AgedHSCe	DEN_INTERACT_WITH_LCA5	26	-0.503226	-1.63459	0.00801603	0.0307963	1	3637	tags=50%, list=12%, signal=57%
YoungHSCe_vs_AgedHSCe	CHANG_CORE_SERUM_RESPONSE_UP	205	-0.33273	-1.63344	0.0018018	0.031028	1	3920	tags=24%, list=13%, signal=27%
YoungHSCe_vs_AgedHSCe	PID_HIF1_TFPATHWAY	60	-0.404409	-1.633	0.00764818	0.031107	1	2763	tags=27%, list=9%, signal=29%
YoungHSCe_vs_AgedHSCe	PID_MAPK_TRK_PATHWAY	33	-0.462664	-1.6327	0.0228137	0.0311349	1	3840	tags=39%, list=13%, signal=45%
YoungHSCe_vs_AgedHSCe	REACTOME_FRS2_MEDIATED_CASCADE	27	-0.493471	-1.63149	0.0208729	0.0314288	1	2242	tags=30%, list=8%, signal=32%
YoungHSCe_vs_AgedHSCe	RICKMAN_METASTASIS_DN	229	-0.323459	-1.63037	0	0.0316866	1	2480	tags=19%, list=8%, signal=20%
YoungHSCe_vs_AgedHSCe	LINDGREN_BLADDER_CANCER_CLUSTER_2B	346	-0.308928	-1.63029	0	0.0316547	1	2229	tags=16%, list=7%, signal=17%
YoungHSCe_vs_AgedHSCe	LABBE_TARGETS_OF_TGFB1_AND_WNT3A_DN	86	-0.378112	-1.63024	0.00551471	0.0316278	1	2958	tags=23%, list=10%, signal=26%
YoungHSCe_vs_AgedHSCe	REACTOME_APOPTOTIC_EXECUTION_PHASE	50	-0.423029	-1.63002	0.00787402	0.0316342	1	3913	tags=30%, list=13%, signal=34%
YoungHSCe_vs_AgedHSCe	AKL_HTLV1_INFECTION_DN	60	-0.414206	-1.63002	0.0127505	0.0315915	1	3218	tags=28%, list=11%, signal=32%
YoungHSCe_vs_AgedHSCe	MA_MYELOID_DIFFERENTIATION_DN	37	-0.450615	-1.62751	0.0132827	0.0321803	1	2143	tags=27%, list=7%, signal=29%
YoungHSCe_vs_AgedHSCe	BLALOCK_ALZHEIMERS_DISEASE_INCIPIENT_UP	360	-0.305052	-1.62714	0	0.0322239	1	3305	tags=24%, list=11%, signal=27%
YoungHSCe_vs_AgedHSCe	PID_S1P_S1P3_PATHWAY	27	-0.490246	-1.62713	0.0119522	0.0321806	1	2254	tags=30%, list=8%, signal=32%
YoungHSCe_vs_AgedHSCe	BROWNE_HCMV_INFECTION_4HR_DN	223	-0.327936	-1.6268	0	0.0322256	1	3504	tags=26%, list=12%, signal=29%
YoungHSCe_vs_AgedHSCe	BIOCARTA_MAL_PATHWAY	19	-0.52689	-1.62465	0.0171429	0.0327901	1	2992	tags=47%, list=10%, signal=53%
YoungHSCe_vs_AgedHSCe	REACTOME_COSTIMULATION_BY_THE_CD28_FAMILY	57	-0.411993	-1.62413	0.00179856	0.0329363	1	3349	tags=25%, list=11%, signal=28%
YoungHSCe_vs_AgedHSCe	BILBAN_B_CLL_LPL_DN	39	-0.445946	-1.62313	0.00561798	0.0331272	1	3502	tags=41%, list=12%, signal=46%
YoungHSCe_vs_AgedHSCe	INGRAM_SHH_TARGETS_DN	50	-0.420674	-1.62308	0.00582524	0.0330908	1	3498	tags=28%, list=12%, signal=32%
YoungHSCe_vs_AgedHSCe	MARSON_FOXP3_TARGETS_UP	62	-0.40538	-1.62259	0.00559702	0.0332	1	2967	tags=23%, list=10%, signal=25%
YoungHSCe_vs_AgedHSCe	COATES_MACROPHAGE_M1_VS_M2_DN	67	-0.39703	-1.62215	0.00574713	0.0332715	1	2921	tags=27%, list=10%, signal=30%
YoungHSCe_vs_AgedHSCe	MULLIGHAN_MLL_SIGNATURE_2_DN	249	-0.316248	-1.62157	0.00169205	0.0333751	1	2946	tags=22%, list=10%, signal=25%
YoungHSCe_vs_AgedHSCe	BHATI_G2M_ARREST_BY_2METHOXYESTRADIOL_UP	109	-0.365005	-1.61915	0.00192308	0.034004	1	3667	tags=27%, list=12%, signal=30%
YoungHSCe_vs_AgedHSCe	DARWICHE_PAPILLOMA_RISK_HIGH_UP	118	-0.348613	-1.61871	0	0.0340968	1	2965	tags=26%, list=10%, signal=29%
YoungHSCe_vs_AgedHSCe	STAMBOLSKY_RESPONSE_TO_VITAMIN_D3_UP	69	-0.40019	-1.61869	0.0109689	0.0340563	1	2946	tags=23%, list=10%, signal=26%
YoungHSCe_vs_AgedHSCe	WAMUNYOKOLI_OVARIAN_CANCER_LMP_UP	243	-0.320169	-1.61867	0	0.0340222	1	3434	tags=25%, list=12%, signal=28%
YoungHSCe_vs_AgedHSCe	GENTILE_UV_RESPONSE_CLUSTER_D9	25	-0.491314	-1.61672	0.0189036	0.0345067	1	2991	tags=36%, list=10%, signal=40%
YoungHSCe_vs_AgedHSCe	MARTINEZ_RB1_AND_TP53_TARGETS_DN	493	-0.294362	-1.61616	0	0.0346348	1	3768	tags=24%, list=13%, signal=27%
YoungHSCe_vs_AgedHSCe	REACTOME_MRNA_3_END_PROCESSING	33	-0.458591	-1.61425	0.0118343	0.035094	1	2663	tags=36%, list=9%, signal=40%
YoungHSCe_vs_AgedHSCe	GRAESSMANN_RESPONSE_TO_MC_AND_SERUM_DEPRIVATION_DN	71	-0.39	-1.61398	0.00738007	0.0351279	1	3610	tags=27%, list=12%, signal=30%
YoungHSCe_vs_AgedHSCe	PRAMOONJAGO_SOX4_TARGETS_DN	47	-0.425675	-1.61307	0.0144928	0.0353621	1	3055	tags=26%, list=10%, signal=28%
YoungHSCe_vs_AgedHSCe	BROWNE_HCMV_INFECTION_10HR_DN	52	-0.418923	-1.61278	0.00759013	0.0353911	1	1835	tags=25%, list=6%, signal=27%
YoungHSCe_vs_AgedHSCe	MAHADEVAN_RESPONSE_TO_MP470_DN	18	-0.54457	-1.61236	0.0262664	0.0354462	1	2202	tags=33%, list=7%, signal=36%
YoungHSCe_vs_AgedHSCe	KEGG_THYROID_CANCER	28	-0.477305	-1.61129	0.0164948	0.035705	1	2360	tags=32%, list=8%, signal=35%
YoungHSCe_vs_AgedHSCe	MIZUSHIMA_AUTOPHAGOSOME_FORMATION	19	-0.522371	-1.61111	0.0401606	0.0357089	1	2296	tags=37%, list=8%, signal=40%
YoungHSCe_vs_AgedHSCe	MANALO_HYPOXIA_UP	190	-0.327961	-1.61102	0.00171527	0.0356931	1	3449	tags=23%, list=12%, signal=26%
YoungHSCe_vs_AgedHSCe	REACTOME_G_PROTEIN_ACTIVATION	21	-0.516757	-1.61099	0.0302457	0.0356496	1	10157	tags=67%, list=34%, signal=101%
YoungHSCe_vs_AgedHSCe	DANG_REGULATED_BY_MYC_DN	235	-0.319745	-1.60982	0	0.035921	1	3638	tags=24%, list=12%, signal=27%
YoungHSCe_vs_AgedHSCe	GRADE_METASTASIS_DN	45	-0.424572	-1.60978	0.0191939	0.035891	1	3637	tags=33%, list=12%, signal=38%
YoungHSCe_vs_AgedHSCe	RUTELLA_RESPONSE_TO_CSF2RB_AND_IL4_DN	285	-0.311178	-1.60947	0	0.0359219	1	3692	tags=25%, list=12%, signal=29%
YoungHSCe_vs_AgedHSCe	BIOCARTA_FMLP_PATHWAY	32	-0.463268	-1.60887	0.0202578	0.0360564	1	2449	tags=38%, list=8%, signal=41%
YoungHSCe_vs_AgedHSCe	REACTOME_CELL_CYCLE_MITOTIC	306	-0.311056	-1.60851	0	0.036119	1	3682	tags=24%, list=12%, signal=27%
YoungHSCe_vs_AgedHSCe	PID_IL1_PATHWAY	32	-0.459624	-1.6074	0.0180723	0.0363879	1	1977	tags=38%, list=7%, signal=40%
YoungHSCe_vs_AgedHSCe	MOREAUX_B_LYMPHOCYTE_MATURATION_BY_TACI_DN	70	-0.390684	-1.60721	0.00364964	0.0364002	1	2491	tags=26%, list=8%, signal=28%
YoungHSCe_vs_AgedHSCe	PID_EPHB_FWD_PATHWAY	38	-0.440163	-1.60616	0.0187266	0.0366714	1	3454	tags=32%, list=12%, signal=36%
YoungHSCe_vs_AgedHSCe	WHITFIELD_CELL_CYCLE_G2_M	198	-0.325148	-1.60576	0.0017094	0.0367178	1	2186	tags=17%, list=7%, signal=18%
YoungHSCe_vs_AgedHSCe	ZHANG_BREAST_CANCER_PROGENITORS_DN	133	-0.341935	-1.60453	0	0.0370084	1	3953	tags=25%, list=13%, signal=28%
YoungHSCe_vs_AgedHSCe	BERENJENO_TRANSFORMED_BY_RHOA_DN	365	-0.30318	-1.60451	0	0.0369698	1	3756	tags=24%, list=13%, signal=27%
YoungHSCe_vs_AgedHSCe	WEIGEL_OXIDATIVE_STRESS_BY_TBH_AND_H2O2	34	-0.449419	-1.60404	0.0116732	0.0370475	1	3470	tags=29%, list=12%, signal=33%
YoungHSCe_vs_AgedHSCe	REACTOME_NEGATIVE_REGULATION_OF_FGFR_SIGNALING	27	-0.480614	-1.6027	0.0196078	0.0374153	1	2801	tags=30%, list=9%, signal=33%
YoungHSCe_vs_AgedHSCe	RIZ_ERYTHROID_DIFFERENTIATION	72	-0.387155	-1.60241	0.00907441	0.0374499	1	2190	tags=24%, list=7%, signal=25%
YoungHSCe_vs_AgedHSCe	REACTOME_INSULIN_RECEPTOR_SIGNALLING_CASCADE	73	-0.383643	-1.60235	0.00372439	0.0374289	1	3340	tags=27%, list=11%, signal=31%
YoungHSCe_vs_AgedHSCe	REACTOME_SIGNALING_BY_ERBB2	95	-0.367261	-1.60088	0.00181818	0.0377919	1	3228	tags=25%, list=11%, signal=28%
YoungHSCe_vs_AgedHSCe	PID_AR_NONGENOMIC_PATHWAY	31	-0.46286	-1.59955	0.0114943	0.0381729	1	2449	tags=32%, list=8%, signal=35%
YoungHSCe_vs_AgedHSCe	KRIEG_HYPOXIA_VIA_KDM3A	46	-0.418425	-1.59897	0.00389864	0.0382976	1	3481	tags=30%, list=12%, signal=34%
YoungHSCe_vs_AgedHSCe	CHIARADONNA_NEOPLASTIC_TRANSFORMATION_KRAS_DN	135	-0.3449	-1.59875	0	0.0383322	1	2185	tags=19%, list=7%, signal=20%
YoungHSCe_vs_AgedHSCe	CHANDRAN_METASTASIS_UP	191	-0.328972	-1.59804	0.00530973	0.0384935	1	2950	tags=24%, list=10%, signal=27%
YoungHSCe_vs_AgedHSCe	HORIUCHI_WTAP_TARGETS_DN	290	-0.312107	-1.59792	0	0.0384817	1	3540	tags=22%, list=12%, signal=25%
YoungHSCe_vs_AgedHSCe	GRUETZMANN_PANCREATIC_CANCER_UP	329	-0.303266	-1.59781	0	0.0384523	1	3760	tags=25%, list=13%, signal=29%
YoungHSCe_vs_AgedHSCe	HEDENFALK_BREAST_CANCER_HEREDITARY_VS_SPORADIC	45	-0.421668	-1.59689	0.0254545	0.0386705	1	3786	tags=33%, list=13%, signal=38%
YoungHSCe_vs_AgedHSCe	MALONEY_RESPONSE_TO_17AAG_DN	77	-0.386425	-1.59658	0.003861	0.0387151	1	3475	tags=30%, list=12%, signal=34%
YoungHSCe_vs_AgedHSCe	CHIBA_RESPONSE_TO_TSA	45	-0.426637	-1.59591	0.00596422	0.0388663	1	2759	tags=31%, list=9%, signal=34%
YoungHSCe_vs_AgedHSCe	REACTOME_TRAF6_MEDIATED_INDUCTION_OF_NFKB_AND_MAP_KINASES_UPON_TLR7_8_OR_9_ACTIVATION	71	-0.388511	-1.59491	0.00396825	0.0390981	1	3616	tags=34%, list=12%, signal=38%
YoungHSCe_vs_AgedHSCe	SCHURINGA_STAT5A_TARGETS_DN	15	-0.551693	-1.59482	0.0387755	0.0390725	1	358	tags=20%, list=1%, signal=20%
YoungHSCe_vs_AgedHSCe	REACTOME_DESTABILIZATION_OF_MRNA_BY_KSRP	17	-0.549815	-1.59339	0.0328185	0.0394784	1	2294	tags=35%, list=8%, signal=38%
YoungHSCe_vs_AgedHSCe	EPPERT_PROGENITOR	130	-0.343951	-1.59332	0.00368324	0.0394493	1	3226	tags=25%, list=11%, signal=27%
YoungHSCe_vs_AgedHSCe	MODY_HIPPOCAMPUS_PRENATAL	41	-0.433481	-1.59289	0.0168224	0.0395247	1	3772	tags=41%, list=13%, signal=47%
YoungHSCe_vs_AgedHSCe	LOCKWOOD_AMPLIFIED_IN_LUNG_CANCER	207	-0.323767	-1.5923	0.0018797	0.0396618	1	3076	tags=23%, list=10%, signal=26%
YoungHSCe_vs_AgedHSCe	SCHAEFFER_PROSTATE_DEVELOPMENT_12HR_UP	90	-0.368261	-1.59216	0.00566038	0.039666	1	3756	tags=24%, list=13%, signal=28%
YoungHSCe_vs_AgedHSCe	KENNY_CTNNB1_TARGETS_DN	48	-0.424607	-1.59171	0.0094518	0.039762	1	3637	tags=31%, list=12%, signal=36%
YoungHSCe_vs_AgedHSCe	WONG_MITOCHONDRIA_GENE_MODULE	214	-0.317661	-1.59118	0	0.0398897	1	3444	tags=23%, list=12%, signal=26%
YoungHSCe_vs_AgedHSCe	PID_ECADHERIN_STABILIZATION_PATHWAY	38	-0.437978	-1.59052	0.0206767	0.0400314	1	3215	tags=37%, list=11%, signal=41%
YoungHSCe_vs_AgedHSCe	GARGALOVIC_RESPONSE_TO_OXIDIZED_PHOSPHOLIPIDS_RED_UP	16	-0.540713	-1.59022	0.03861	0.040082	1	3211	tags=50%, list=11%, signal=56%
YoungHSCe_vs_AgedHSCe	ACEVEDO_NORMAL_TISSUE_ADJACENT_TO_LIVER_TUMOR_UP	146	-0.333456	-1.5898	0.0018315	0.0401547	1	3907	tags=25%, list=13%, signal=29%
YoungHSCe_vs_AgedHSCe	IGLESIAS_E2F_TARGETS_UP	135	-0.3433	-1.58968	0.00931099	0.0401414	1	3445	tags=24%, list=12%, signal=28%
YoungHSCe_vs_AgedHSCe	BACOLOD_RESISTANCE_TO_ALKYLATING_AGENTS_DN	54	-0.406834	-1.58938	0.0146789	0.0402034	1	3077	tags=28%, list=10%, signal=31%
YoungHSCe_vs_AgedHSCe	GENTILE_RESPONSE_CLUSTER_D3	60	-0.399317	-1.58918	0.0110906	0.0402161	1	3920	tags=37%, list=13%, signal=42%
YoungHSCe_vs_AgedHSCe	NADLER_OBESITY_DN	40	-0.429295	-1.58871	0.0154739	0.0403098	1	8148	tags=52%, list=27%, signal=72%
YoungHSCe_vs_AgedHSCe	FERREIRA_EWINGS_SARCOMA_UNSTABLE_VS_STABLE_UP	152	-0.334617	-1.58749	0.00182482	0.0406105	1	3059	tags=22%, list=10%, signal=24%
YoungHSCe_vs_AgedHSCe	REACTOME_APOPTOTIC_CLEAVAGE_OF_CELLULAR_PROTEINS	36	-0.446253	-1.58662	0.0272374	0.0408578	1	3913	tags=31%, list=13%, signal=35%
YoungHSCe_vs_AgedHSCe	LIU_NASOPHARYNGEAL_CARCINOMA	63	-0.393366	-1.58634	0.0108893	0.0408912	1	2761	tags=27%, list=9%, signal=30%
YoungHSCe_vs_AgedHSCe	BRUINS_UVC_RESPONSE_VIA_TP53_GROUP_D	224	-0.315976	-1.58605	0.0018018	0.0409321	1	4372	tags=27%, list=15%, signal=31%
YoungHSCe_vs_AgedHSCe	WATANABE_RECTAL_CANCER_RADIOTHERAPY_RESPONSIVE_DN	88	-0.370018	-1.58462	0.003663	0.041307	1	4048	tags=27%, list=14%, signal=31%
YoungHSCe_vs_AgedHSCe	POMEROY_MEDULLOBLASTOMA_PROGNOSIS_UP	39	-0.436466	-1.58435	0.00988142	0.0413255	1	2140	tags=28%, list=7%, signal=30%
YoungHSCe_vs_AgedHSCe	GINESTIER_BREAST_CANCER_ZNF217_AMPLIFIED_UP	71	-0.386066	-1.584	0.0130597	0.0413613	1	3085	tags=30%, list=10%, signal=33%
YoungHSCe_vs_AgedHSCe	CHARAFE_BREAST_CANCER_LUMINAL_VS_BASAL_DN	393	-0.294955	-1.58378	0	0.0413782	1	3715	tags=23%, list=12%, signal=26%
YoungHSCe_vs_AgedHSCe	DAVICIONI_TARGETS_OF_PAX_FOXO1_FUSIONS_UP	225	-0.317555	-1.5834	0.00355872	0.0414599	1	3309	tags=22%, list=11%, signal=25%
YoungHSCe_vs_AgedHSCe	ASGHARZADEH_NEUROBLASTOMA_POOR_SURVIVAL_DN	40	-0.436248	-1.58282	0.0118812	0.0415885	1	2368	tags=28%, list=8%, signal=30%
YoungHSCe_vs_AgedHSCe	BOYAULT_LIVER_CANCER_SUBCLASS_G56_DN	15	-0.549872	-1.58281	0.026975	0.0415377	1	3204	tags=40%, list=11%, signal=45%
YoungHSCe_vs_AgedHSCe	IKEDA_MIR133_TARGETS_UP	42	-0.431358	-1.5828	0.0119522	0.041497	1	3304	tags=31%, list=11%, signal=35%
YoungHSCe_vs_AgedHSCe	SIMBULAN_UV_RESPONSE_IMMORTALIZED_DN	31	-0.456316	-1.58178	0.0254902	0.0417845	1	3220	tags=32%, list=11%, signal=36%
YoungHSCe_vs_AgedHSCe	HONMA_DOCETAXEL_RESISTANCE	34	-0.446327	-1.58156	0.0221774	0.041792	1	3445	tags=32%, list=12%, signal=37%
YoungHSCe_vs_AgedHSCe	KUMAR_PATHOGEN_LOAD_BY_MACROPHAGES	216	-0.320219	-1.58061	0	0.0420256	1	2664	tags=20%, list=9%, signal=22%
YoungHSCe_vs_AgedHSCe	DUTERTRE_ESTRADIOL_RESPONSE_24HR_DN	465	-0.292184	-1.58059	0	0.0419831	1	3309	tags=21%, list=11%, signal=24%
YoungHSCe_vs_AgedHSCe	LUI_THYROID_CANCER_CLUSTER_3	28	-0.464331	-1.57974	0.0267176	0.0422179	1	7397	tags=57%, list=25%, signal=76%
YoungHSCe_vs_AgedHSCe	KEGG_COLORECTAL_CANCER	61	-0.396189	-1.57825	0.0153551	0.0426595	1	2254	tags=26%, list=8%, signal=28%
YoungHSCe_vs_AgedHSCe	REACTOME_PI3K_CASCADE	57	-0.395041	-1.57799	0.0137255	0.0426974	1	3340	tags=26%, list=11%, signal=30%
YoungHSCe_vs_AgedHSCe	PID_SHP2_PATHWAY	51	-0.409617	-1.57771	0.0150094	0.042742	1	2802	tags=27%, list=9%, signal=30%
YoungHSCe_vs_AgedHSCe	GENTILE_UV_RESPONSE_CLUSTER_D7	38	-0.429291	-1.57716	0.0290135	0.04287	1	3468	tags=34%, list=12%, signal=39%
YoungHSCe_vs_AgedHSCe	CHARAFE_BREAST_CANCER_BASAL_VS_MESENCHYMAL_DN	45	-0.429242	-1.57713	0.0175439	0.0428268	1	7554	tags=51%, list=25%, signal=68%
YoungHSCe_vs_AgedHSCe	JIANG_AGING_HYPOTHALAMUS_DN	39	-0.430153	-1.57691	0.0211538	0.0428346	1	3008	tags=33%, list=10%, signal=37%
YoungHSCe_vs_AgedHSCe	GARGALOVIC_RESPONSE_TO_OXIDIZED_PHOSPHOLIPIDS_GREEN_UP	22	-0.510616	-1.57682	0.036965	0.0428114	1	3161	tags=41%, list=11%, signal=46%
YoungHSCe_vs_AgedHSCe	REACTOME_STRIATED_MUSCLE_CONTRACTION	19	-0.518797	-1.576	0.0235294	0.0430389	1	3320	tags=26%, list=11%, signal=30%
YoungHSCe_vs_AgedHSCe	PID_FAK_PATHWAY	57	-0.394557	-1.57541	0.0115385	0.0431828	1	3454	tags=32%, list=12%, signal=36%
YoungHSCe_vs_AgedHSCe	SIMBULAN_UV_RESPONSE_NORMAL_DN	32	-0.445497	-1.57443	0.0229167	0.0434845	1	3220	tags=34%, list=11%, signal=38%
YoungHSCe_vs_AgedHSCe	BASAKI_YBX1_TARGETS_DN	341	-0.299219	-1.57303	0	0.0438786	1	3615	tags=25%, list=12%, signal=28%
YoungHSCe_vs_AgedHSCe	GAZDA_DIAMOND_BLACKFAN_ANEMIA_PROGENITOR_DN	62	-0.389858	-1.5727	0.0108893	0.0439352	1	3413	tags=29%, list=11%, signal=33%
YoungHSCe_vs_AgedHSCe	ONDER_CDH1_TARGETS_1_DN	136	-0.337199	-1.57159	0.00182482	0.0442482	1	3235	tags=26%, list=11%, signal=30%
YoungHSCe_vs_AgedHSCe	ZHAN_MULTIPLE_MYELOMA_HP_DN	43	-0.421459	-1.57145	0.019685	0.0442331	1	2677	tags=23%, list=9%, signal=26%
YoungHSCe_vs_AgedHSCe	PID_INSULIN_GLUCOSE_PATHWAY	24	-0.486859	-1.57138	0.0194175	0.0442111	1	1857	tags=33%, list=6%, signal=36%
YoungHSCe_vs_AgedHSCe	KIM_MYCL1_AMPLIFICATION_TARGETS_DN	17	-0.541038	-1.57127	0.027668	0.0442031	1	3277	tags=41%, list=11%, signal=46%
YoungHSCe_vs_AgedHSCe	NIKOLSKY_BREAST_CANCER_7P22_AMPLICON	35	-0.44524	-1.57115	0.0209125	0.0441839	1	4099	tags=34%, list=14%, signal=40%
YoungHSCe_vs_AgedHSCe	RATTENBACHER_BOUND_BY_CELF1	372	-0.29587	-1.57088	0	0.0442319	1	2550	tags=18%, list=9%, signal=19%
YoungHSCe_vs_AgedHSCe	HILLION_HMGA1_TARGETS	74	-0.375676	-1.57074	0.010929	0.0442281	1	4443	tags=35%, list=15%, signal=41%
YoungHSCe_vs_AgedHSCe	ABBUD_LIF_SIGNALING_1_UP	38	-0.438752	-1.57062	0.0188679	0.0442257	1	3478	tags=29%, list=12%, signal=33%
YoungHSCe_vs_AgedHSCe	ZHANG_PROLIFERATING_VS_QUIESCENT	50	-0.410052	-1.57039	0.00932836	0.0442429	1	3638	tags=34%, list=12%, signal=39%
YoungHSCe_vs_AgedHSCe	NIKOLSKY_BREAST_CANCER_20Q11_AMPLICON	26	-0.48521	-1.56988	0.0366089	0.0443485	1	2440	tags=23%, list=8%, signal=25%
YoungHSCe_vs_AgedHSCe	WANG_BARRETTS_ESOPHAGUS_AND_ESOPHAGUS_CANCER_DN	23	-0.49621	-1.56923	0.0319361	0.0445229	1	3700	tags=26%, list=12%, signal=30%
YoungHSCe_vs_AgedHSCe	CROONQUIST_STROMAL_STIMULATION_UP	50	-0.405265	-1.56898	0.0134615	0.0445658	1	7393	tags=46%, list=25%, signal=61%
YoungHSCe_vs_AgedHSCe	AMUNDSON_POOR_SURVIVAL_AFTER_GAMMA_RADIATION_2G	166	-0.327728	-1.56869	0.00368324	0.0446251	1	3468	tags=25%, list=12%, signal=28%
YoungHSCe_vs_AgedHSCe	GAUSSMANN_MLL_AF4_FUSION_TARGETS_C_UP	158	-0.329727	-1.56744	0	0.0449767	1	3393	tags=28%, list=11%, signal=31%
YoungHSCe_vs_AgedHSCe	WHITEHURST_PACLITAXEL_SENSITIVITY	33	-0.444106	-1.56743	0.0331384	0.0449294	1	6151	tags=45%, list=21%, signal=57%
YoungHSCe_vs_AgedHSCe	DACOSTA_UV_RESPONSE_VIA_ERCC3_UP	297	-0.304335	-1.56714	0	0.0449794	1	3756	tags=26%, list=13%, signal=29%
YoungHSCe_vs_AgedHSCe	RICKMAN_METASTASIS_UP	320	-0.300842	-1.56622	0	0.0452359	1	3754	tags=28%, list=13%, signal=31%
YoungHSCe_vs_AgedHSCe	REACTOME_JNK_C_JUN_KINASES_PHOSPHORYLATION_AND_ACTIVATION_MEDIATED_BY_ACTIVATED_HUMAN_TAK1	16	-0.547934	-1.56583	0.0314961	0.0453199	1	3128	tags=38%, list=10%, signal=42%
YoungHSCe_vs_AgedHSCe	KEGG_ADHERENS_JUNCTION	71	-0.377836	-1.56582	0.0165746	0.0452725	1	2275	tags=21%, list=8%, signal=23%
YoungHSCe_vs_AgedHSCe	PID_DELTA_NP63_PATHWAY	41	-0.427145	-1.56548	0.0165138	0.0453398	1	5418	tags=37%, list=18%, signal=45%
YoungHSCe_vs_AgedHSCe	REACTOME_PPARA_ACTIVATES_GENE_EXPRESSION	94	-0.361097	-1.56544	0.0149533	0.045302	1	2971	tags=26%, list=10%, signal=28%
YoungHSCe_vs_AgedHSCe	QI_HYPOXIA_TARGETS_OF_HIF1A_AND_FOXA2	34	-0.446696	-1.56482	0.0250482	0.0454611	1	3666	tags=38%, list=12%, signal=44%
YoungHSCe_vs_AgedHSCe	LU_IL4_SIGNALING	85	-0.364414	-1.5634	0.00566038	0.045945	1	2638	tags=24%, list=9%, signal=26%
YoungHSCe_vs_AgedHSCe	ICHIBA_GRAFT_VERSUS_HOST_DISEASE_35D_UP	106	-0.350932	-1.56313	0.00369686	0.0459883	1	3481	tags=24%, list=12%, signal=27%
YoungHSCe_vs_AgedHSCe	REACTOME_MYOGENESIS	24	-0.480908	-1.5621	0.0330739	0.0463173	1	5966	tags=42%, list=20%, signal=52%
YoungHSCe_vs_AgedHSCe	PID_P75_NTR_PATHWAY	66	-0.382348	-1.56155	0.00753296	0.0464594	1	3840	tags=33%, list=13%, signal=38%
YoungHSCe_vs_AgedHSCe	WANG_ESOPHAGUS_CANCER_VS_NORMAL_DN	93	-0.361995	-1.56083	0.00733945	0.0466715	1	3087	tags=23%, list=10%, signal=25%
YoungHSCe_vs_AgedHSCe	LU_AGING_BRAIN_DN	131	-0.338656	-1.56053	0.00578035	0.0467382	1	3438	tags=30%, list=12%, signal=34%
YoungHSCe_vs_AgedHSCe	REACTOME_RIG_I_MDA5_MEDIATED_INDUCTION_OF_IFN_ALPHA_BETA_PATHWAYS	59	-0.389813	-1.56042	0.0107527	0.0467275	1	3616	tags=37%, list=12%, signal=42%
YoungHSCe_vs_AgedHSCe	MCCLUNG_COCAIN_REWARD_4WK	61	-0.385979	-1.56002	0.00954198	0.0468293	1	3759	tags=30%, list=13%, signal=34%
YoungHSCe_vs_AgedHSCe	CHOW_RASSF1_TARGETS_DN	29	-0.456217	-1.55999	0.030303	0.046786	1	3446	tags=38%, list=12%, signal=43%
YoungHSCe_vs_AgedHSCe	ST_ERK1_ERK2_MAPK_PATHWAY	31	-0.446504	-1.55967	0.0184502	0.0468537	1	1223	tags=26%, list=4%, signal=27%
YoungHSCe_vs_AgedHSCe	ODONNELL_TARGETS_OF_MYC_AND_TFRC_DN	43	-0.416944	-1.55926	0.0150943	0.0469534	1	1954	tags=19%, list=7%, signal=20%
YoungHSCe_vs_AgedHSCe	CHANDRAN_METASTASIS_TOP50_UP	34	-0.43691	-1.55919	0.0326531	0.0469251	1	1530	tags=24%, list=5%, signal=25%
YoungHSCe_vs_AgedHSCe	MA_PITUITARY_FETAL_VS_ADULT_UP	25	-0.477818	-1.55893	0.0373281	0.0469585	1	2970	tags=32%, list=10%, signal=36%
YoungHSCe_vs_AgedHSCe	CHUNG_BLISTER_CYTOTOXICITY_UP	122	-0.340881	-1.55824	0.00948767	0.0471341	1	3129	tags=21%, list=10%, signal=24%
YoungHSCe_vs_AgedHSCe	TRACEY_RESISTANCE_TO_IFNA2_DN	30	-0.454117	-1.55771	0.0218254	0.0472721	1	3780	tags=33%, list=13%, signal=38%
YoungHSCe_vs_AgedHSCe	REACTOME_SIGNALING_BY_INSULIN_RECEPTOR	92	-0.364165	-1.5567	0.00988142	0.0475783	1	3340	tags=28%, list=11%, signal=32%
YoungHSCe_vs_AgedHSCe	LUI_THYROID_CANCER_CLUSTER_1	49	-0.408156	-1.55614	0.0191571	0.0476995	1	3449	tags=29%, list=12%, signal=32%
YoungHSCe_vs_AgedHSCe	PID_REELIN_PATHWAY	27	-0.469058	-1.55601	0.0265655	0.0476931	1	4367	tags=41%, list=15%, signal=48%
YoungHSCe_vs_AgedHSCe	DANG_MYC_TARGETS_DN	30	-0.451976	-1.55571	0.0322581	0.0477455	1	6048	tags=47%, list=20%, signal=58%
YoungHSCe_vs_AgedHSCe	SIG_INSULIN_RECEPTOR_PATHWAY_IN_CARDIAC_MYOCYTES	48	-0.406811	-1.55493	0.0077821	0.0479715	1	2242	tags=27%, list=8%, signal=29%
YoungHSCe_vs_AgedHSCe	REACTOME_GLYCOLYSIS	26	-0.467168	-1.55483	0.023166	0.0479584	1	3798	tags=31%, list=13%, signal=35%
YoungHSCe_vs_AgedHSCe	ALONSO_METASTASIS_EMT_UP	32	-0.446258	-1.55454	0.0300752	0.0480088	1	1698	tags=22%, list=6%, signal=23%
YoungHSCe_vs_AgedHSCe	WOOD_EBV_EBNA1_TARGETS_UP	103	-0.351483	-1.55414	0.00372439	0.0480715	1	2895	tags=21%, list=10%, signal=24%
YoungHSCe_vs_AgedHSCe	TOOKER_GEMCITABINE_RESISTANCE_DN	118	-0.346022	-1.554	0.0106383	0.0480569	1	3356	tags=24%, list=11%, signal=27%
YoungHSCe_vs_AgedHSCe	REACTOME_ENDOSOMAL_SORTING_COMPLEX_REQUIRED_FOR_TRANSPORT_ESCRT	25	-0.474613	-1.55393	0.0271845	0.0480224	1	2801	tags=44%, list=9%, signal=49%
YoungHSCe_vs_AgedHSCe	BIOCARTA_IGF1MTOR_PATHWAY	20	-0.514047	-1.55243	0.0243408	0.0484887	1	3340	tags=45%, list=11%, signal=51%
YoungHSCe_vs_AgedHSCe	SHEDDEN_LUNG_CANCER_POOR_SURVIVAL_A6	422	-0.289574	-1.5524	0	0.0484432	1	3701	tags=22%, list=12%, signal=25%
YoungHSCe_vs_AgedHSCe	MEINHOLD_OVARIAN_CANCER_LOW_GRADE_UP	18	-0.524784	-1.55222	0.0309278	0.0484599	1	2325	tags=33%, list=8%, signal=36%
YoungHSCe_vs_AgedHSCe	BURTON_ADIPOGENESIS_PEAK_AT_8HR	39	-0.429917	-1.5522	0.0213178	0.0484227	1	3406	tags=33%, list=11%, signal=38%
YoungHSCe_vs_AgedHSCe	HINATA_NFKB_TARGETS_KERATINOCYTE_UP	74	-0.367737	-1.5502	0.00756144	0.0491209	1	3556	tags=30%, list=12%, signal=34%
YoungHSCe_vs_AgedHSCe	PID_MYC_PATHWAY	25	-0.480932	-1.55011	0.0169492	0.0490933	1	4087	tags=48%, list=14%, signal=56%
YoungHSCe_vs_AgedHSCe	TSENG_IRS1_TARGETS_UP	95	-0.35441	-1.55009	0.00968992	0.0490408	1	3211	tags=24%, list=11%, signal=27%
YoungHSCe_vs_AgedHSCe	TURASHVILI_BREAST_LOBULAR_CARCINOMA_VS_DUCTAL_NORMAL_UP	55	-0.399917	-1.5496	0.0263158	0.0491744	1	7202	tags=47%, list=24%, signal=62%
YoungHSCe_vs_AgedHSCe	GRAHAM_CML_QUIESCENT_VS_NORMAL_QUIESCENT_DN	46	-0.415169	-1.5486	0.0193798	0.0495018	1	3481	tags=35%, list=12%, signal=39%
YoungHSCe_vs_AgedHSCe	JOHNSTONE_PARVB_TARGETS_2_UP	128	-0.338008	-1.54757	0.00535714	0.0498689	1	2682	tags=24%, list=9%, signal=26%
YoungHSCe_vs_AgedHSCe	ST_B_CELL_ANTIGEN_RECEPTOR	38	-0.4307	-1.54731	0.0229167	0.0499051	1	2391	tags=32%, list=8%, signal=34%
YoungHSCe_vs_AgedHSCe	FERRANDO_T_ALL_WITH_MLL_ENL_FUSION_DN	83	-0.365606	-1.54666	0.0147874	0.0499642	1	3540	tags=33%, list=12%, signal=37%
YoungHSCe_vs_AgedHSCe	KIM_GERMINAL_CENTER_T_HELPER_UP	61	0.421112	1.72865	0.00865801	0.0486062	1	2527	tags=30%, list=8%, signal=32%
YoungHSCe_vs_AgedHSCe	KUNINGER_IGF1_VS_PDGFB_TARGETS_UP	55	0.427287	1.73555	0.00211864	0.0457929	1	7306	tags=38%, list=24%, signal=50%
YoungHSCe_vs_AgedHSCe	KYNG_NORMAL_AGING_DN	25	0.537967	1.73892	0.0105708	0.0447243	1	3088	tags=36%, list=10%, signal=40%
YoungHSCe_vs_AgedHSCe	KEGG_STARCH_AND_SUCROSE_METABOLISM	30	0.500084	1.73958	0.00194553	0.0447843	1	4930	tags=47%, list=17%, signal=56%
YoungHSCe_vs_AgedHSCe	YANG_MUC2_TARGETS_DUODENUM_3MO_DN	18	0.569578	1.74138	0.00576923	0.0443923	1	2131	tags=28%, list=7%, signal=30%
YoungHSCe_vs_AgedHSCe	REACTOME_SULFUR_AMINO_ACID_METABOLISM	23	0.53941	1.74478	0.00788955	0.0433569	1	3725	tags=35%, list=12%, signal=40%
YoungHSCe_vs_AgedHSCe	BIDUS_METASTASIS_DN	146	0.361886	1.74878	0	0.0421381	0.999	3805	tags=32%, list=13%, signal=37%
YoungHSCe_vs_AgedHSCe	GRAESSMANN_APOPTOSIS_BY_SERUM_DEPRIVATION_UP	481	0.310773	1.75268	0	0.0410271	0.998	3671	tags=25%, list=12%, signal=28%
YoungHSCe_vs_AgedHSCe	REACTOME_TRIGLYCERIDE_BIOSYNTHESIS	36	0.487091	1.75381	0	0.0408526	0.998	4068	tags=36%, list=14%, signal=42%
YoungHSCe_vs_AgedHSCe	LASTOWSKA_NEUROBLASTOMA_COPY_NUMBER_UP	168	0.355943	1.75494	0	0.0408178	0.997	3746	tags=30%, list=13%, signal=35%
YoungHSCe_vs_AgedHSCe	DAVIES_MULTIPLE_MYELOMA_VS_MGUS_DN	26	0.517308	1.75494	0.00408998	0.0411569	0.997	2490	tags=35%, list=8%, signal=38%
YoungHSCe_vs_AgedHSCe	NEMETH_INFLAMMATORY_RESPONSE_LPS_DN	30	0.502969	1.75513	0.00422833	0.0414398	0.997	2358	tags=37%, list=8%, signal=40%
YoungHSCe_vs_AgedHSCe	MULLIGHAN_NPM1_SIGNATURE_3_UP	304	0.327871	1.76019	0	0.0398065	0.995	3529	tags=23%, list=12%, signal=26%
YoungHSCe_vs_AgedHSCe	HOOI_ST7_TARGETS_UP	78	0.412037	1.76129	0	0.0397173	0.995	3486	tags=33%, list=12%, signal=38%
YoungHSCe_vs_AgedHSCe	GENTLES_LEUKEMIC_STEM_CELL_UP	27	0.528372	1.76328	0.00407332	0.0392657	0.994	2874	tags=37%, list=10%, signal=41%
YoungHSCe_vs_AgedHSCe	DEBIASI_APOPTOSIS_BY_REOVIRUS_INFECTION_DN	280	0.333684	1.76365	0	0.0394206	0.994	3716	tags=30%, list=12%, signal=34%
YoungHSCe_vs_AgedHSCe	LEE_EARLY_T_LYMPHOCYTE_UP	97	0.395988	1.76477	0	0.0393408	0.994	3343	tags=26%, list=11%, signal=29%
YoungHSCe_vs_AgedHSCe	JISON_SICKLE_CELL_DISEASE_UP	172	0.35777	1.76873	0	0.0382701	0.994	3525	tags=28%, list=12%, signal=31%
YoungHSCe_vs_AgedHSCe	WANG_RESPONSE_TO_BEXAROTENE_DN	26	0.522307	1.76914	0.00210084	0.0384865	0.994	3190	tags=38%, list=11%, signal=43%
YoungHSCe_vs_AgedHSCe	BIOCARTA_ATRBRCA_PATHWAY	21	0.555084	1.76941	0.0115385	0.0387219	0.994	6424	tags=43%, list=22%, signal=55%
YoungHSCe_vs_AgedHSCe	KUNINGER_IGF1_VS_PDGFB_TARGETS_DN	39	0.481591	1.77008	0.00212766	0.0387968	0.994	2390	tags=23%, list=8%, signal=25%
YoungHSCe_vs_AgedHSCe	ZHAN_MULTIPLE_MYELOMA_CD1_DN	43	0.465962	1.77015	0.00613497	0.0391221	0.994	2900	tags=37%, list=10%, signal=41%
YoungHSCe_vs_AgedHSCe	DER_IFN_ALPHA_RESPONSE_UP	72	0.420519	1.77377	0	0.0381207	0.994	2668	tags=28%, list=9%, signal=30%
YoungHSCe_vs_AgedHSCe	REACTOME_INTERFERON_SIGNALING	139	0.372452	1.7787	0	0.0368386	0.993	3254	tags=29%, list=11%, signal=32%
YoungHSCe_vs_AgedHSCe	NEWMAN_ERCC6_TARGETS_DN	20	0.563332	1.77892	0.0105485	0.0371224	0.993	3983	tags=40%, list=13%, signal=46%
YoungHSCe_vs_AgedHSCe	DUTERTRE_ESTRADIOL_RESPONSE_6HR_UP	212	0.347649	1.78237	0	0.0361119	0.992	4170	tags=30%, list=14%, signal=35%
YoungHSCe_vs_AgedHSCe	REACTOME_ACTIVATED_AMPK_STIMULATES_FATTY_ACID_OXIDATION_IN_MUSCLE	17	0.59393	1.78341	0.00402414	0.0360946	0.991	3498	tags=47%, list=12%, signal=53%
YoungHSCe_vs_AgedHSCe	GAL_LEUKEMIC_STEM_CELL_UP	119	0.383758	1.78467	0.00232019	0.0360303	0.99	3697	tags=29%, list=12%, signal=32%
YoungHSCe_vs_AgedHSCe	LI_WILMS_TUMOR_VS_FETAL_KIDNEY_1_UP	174	0.365468	1.7853	0	0.0361572	0.99	3875	tags=30%, list=13%, signal=35%
YoungHSCe_vs_AgedHSCe	TAVOR_CEBPA_TARGETS_DN	28	0.524784	1.78824	0	0.0354162	0.989	2284	tags=32%, list=8%, signal=35%
YoungHSCe_vs_AgedHSCe	WAKASUGI_HAVE_ZNF143_BINDING_SITES	58	0.442766	1.79183	0	0.0344972	0.984	3772	tags=34%, list=13%, signal=39%
YoungHSCe_vs_AgedHSCe	DOANE_BREAST_CANCER_ESR1_UP	95	0.401654	1.79693	0	0.0330724	0.98	7246	tags=41%, list=24%, signal=54%
YoungHSCe_vs_AgedHSCe	ALCALAY_AML_BY_NPM1_LOCALIZATION_UP	132	0.378854	1.79716	0	0.033341	0.98	3368	tags=28%, list=11%, signal=31%
YoungHSCe_vs_AgedHSCe	NIKOLSKY_BREAST_CANCER_19Q13.1_AMPLICON	22	0.55624	1.79936	0.00618557	0.0330297	0.978	3683	tags=45%, list=12%, signal=52%
YoungHSCe_vs_AgedHSCe	MIKKELSEN_MCV6_LCP_WITH_H3K4ME3	133	0.378432	1.80139	0	0.0326361	0.976	2631	tags=26%, list=9%, signal=29%
YoungHSCe_vs_AgedHSCe	REACTOME_PEROXISOMAL_LIPID_METABOLISM	20	0.578282	1.80397	0.00618557	0.0322488	0.971	9220	tags=60%, list=31%, signal=87%
YoungHSCe_vs_AgedHSCe	BOQUEST_STEM_CELL_DN	198	0.363024	1.8071	0	0.0315131	0.968	3613	tags=29%, list=12%, signal=33%
YoungHSCe_vs_AgedHSCe	REACTOME_INTERFERON_ALPHA_BETA_SIGNALING	51	0.460312	1.80921	0.00215983	0.0312387	0.968	2610	tags=29%, list=9%, signal=32%
YoungHSCe_vs_AgedHSCe	YAGI_AML_FAB_MARKERS	182	0.362027	1.80924	0	0.0315858	0.968	2950	tags=27%, list=10%, signal=30%
YoungHSCe_vs_AgedHSCe	UROSEVIC_RESPONSE_TO_IMIQUIMOD	20	0.591262	1.81348	0.00421053	0.0305056	0.961	4765	tags=40%, list=16%, signal=48%
YoungHSCe_vs_AgedHSCe	PID_FANCONI_PATHWAY	47	0.473076	1.81383	0	0.030751	0.96	3920	tags=34%, list=13%, signal=39%
YoungHSCe_vs_AgedHSCe	BROWNE_HCMV_INFECTION_14HR_DN	256	0.347556	1.81523	0	0.0306603	0.958	3592	tags=28%, list=12%, signal=31%
YoungHSCe_vs_AgedHSCe	SESTO_RESPONSE_TO_UV_C3	20	0.598083	1.82094	0.00406504	0.0291983	0.952	3322	tags=45%, list=11%, signal=51%
YoungHSCe_vs_AgedHSCe	REACTOME_TRNA_AMINOACYLATION	42	0.485842	1.82414	0.002079	0.0285643	0.946	3032	tags=33%, list=10%, signal=37%
YoungHSCe_vs_AgedHSCe	MAHADEVAN_RESPONSE_TO_MP470_UP	18	0.594678	1.82518	0.00630252	0.0286559	0.943	3070	tags=39%, list=10%, signal=43%
YoungHSCe_vs_AgedHSCe	REACTOME_GENERIC_TRANSCRIPTION_PATHWAY	321	0.342711	1.82531	0	0.0289527	0.942	3699	tags=29%, list=12%, signal=32%
YoungHSCe_vs_AgedHSCe	JAATINEN_HEMATOPOIETIC_STEM_CELL_UP	305	0.343868	1.82767	0	0.0286555	0.939	3894	tags=31%, list=13%, signal=35%
YoungHSCe_vs_AgedHSCe	KEGG_AMINOACYL_TRNA_BIOSYNTHESIS	41	0.487249	1.82847	0	0.0287904	0.939	3032	tags=34%, list=10%, signal=38%
YoungHSCe_vs_AgedHSCe	GRAESSMANN_RESPONSE_TO_MC_AND_SERUM_DEPRIVATION_UP	180	0.370948	1.8351	0	0.0273089	0.934	3202	tags=24%, list=11%, signal=27%
YoungHSCe_vs_AgedHSCe	DUTERTRE_ESTRADIOL_RESPONSE_24HR_UP	307	0.344735	1.83761	0	0.0268392	0.93	3829	tags=25%, list=13%, signal=28%
YoungHSCe_vs_AgedHSCe	KIM_MYCN_AMPLIFICATION_TARGETS_UP	77	0.430762	1.8403	0	0.0263977	0.924	2913	tags=26%, list=10%, signal=29%
YoungHSCe_vs_AgedHSCe	GRABARCZYK_BCL11B_TARGETS_DN	50	0.470881	1.84386	0.00207039	0.025695	0.911	3535	tags=32%, list=12%, signal=36%
YoungHSCe_vs_AgedHSCe	MARKS_HDAC_TARGETS_UP	21	0.576639	1.85098	0	0.0244119	0.903	1534	tags=33%, list=5%, signal=35%
YoungHSCe_vs_AgedHSCe	KANG_DOXORUBICIN_RESISTANCE_UP	53	0.468543	1.85491	0.00212314	0.0235444	0.895	3532	tags=28%, list=12%, signal=32%
YoungHSCe_vs_AgedHSCe	SERVITJA_LIVER_HNF1A_TARGETS_UP	113	0.397477	1.85644	0	0.0235239	0.89	3768	tags=28%, list=13%, signal=32%
YoungHSCe_vs_AgedHSCe	MULLIGHAN_MLL_SIGNATURE_1_UP	352	0.341727	1.85692	0	0.0237149	0.888	3868	tags=29%, list=13%, signal=33%
YoungHSCe_vs_AgedHSCe	GARGALOVIC_RESPONSE_TO_OXIDIZED_PHOSPHOLIPIDS_RED_DN	23	0.579133	1.86614	0.00411523	0.0217132	0.852	3412	tags=43%, list=11%, signal=49%
YoungHSCe_vs_AgedHSCe	SMITH_TERT_TARGETS_DN	82	0.420689	1.86686	0	0.0218489	0.852	3735	tags=28%, list=13%, signal=32%
YoungHSCe_vs_AgedHSCe	MULLIGHAN_NPM1_MUTATED_SIGNATURE_1_UP	244	0.361523	1.87162	0	0.0211834	0.839	3529	tags=25%, list=12%, signal=28%
YoungHSCe_vs_AgedHSCe	DAIRKEE_CANCER_PRONE_RESPONSE_E2	22	0.57923	1.87455	0.00419287	0.0208706	0.827	2216	tags=27%, list=7%, signal=29%
YoungHSCe_vs_AgedHSCe	REACTOME_NITRIC_OXIDE_STIMULATES_GUANYLATE_CYCLASE	24	0.577255	1.88207	0.00622407	0.0194714	0.801	2258	tags=29%, list=8%, signal=32%
YoungHSCe_vs_AgedHSCe	HASLINGER_B_CLL_WITH_6Q21_DELETION	19	0.607901	1.88628	0.00197239	0.0188472	0.783	3463	tags=42%, list=12%, signal=48%
YoungHSCe_vs_AgedHSCe	RADAEVA_RESPONSE_TO_IFNA1_UP	51	0.481181	1.88694	0	0.0190964	0.783	3618	tags=37%, list=12%, signal=42%
YoungHSCe_vs_AgedHSCe	HORIUCHI_WTAP_TARGETS_UP	277	0.355309	1.88774	0	0.0192041	0.782	3636	tags=28%, list=12%, signal=31%
YoungHSCe_vs_AgedHSCe	REACTOME_SYNTHESIS_OF_PA	21	0.598678	1.89162	0	0.0188748	0.768	4068	tags=38%, list=14%, signal=44%
YoungHSCe_vs_AgedHSCe	KEGG_PPAR_SIGNALING_PATHWAY	49	0.482817	1.90035	0	0.0175975	0.74	2938	tags=33%, list=10%, signal=36%
YoungHSCe_vs_AgedHSCe	ZHAN_MULTIPLE_MYELOMA_HP_UP	40	0.508214	1.90182	0	0.017491	0.731	1892	tags=30%, list=6%, signal=32%
YoungHSCe_vs_AgedHSCe	BIOCARTA_CHEMICAL_PATHWAY	22	0.59133	1.91069	0	0.0159789	0.695	3193	tags=41%, list=11%, signal=46%
YoungHSCe_vs_AgedHSCe	BENNETT_SYSTEMIC_LUPUS_ERYTHEMATOSUS	26	0.568047	1.91086	0.00215517	0.0162182	0.694	2894	tags=38%, list=10%, signal=43%
YoungHSCe_vs_AgedHSCe	OHGUCHI_LIVER_HNF4A_TARGETS_UP	34	0.522253	1.92116	0.00213675	0.0145194	0.643	7871	tags=47%, list=26%, signal=64%
YoungHSCe_vs_AgedHSCe	EBAUER_TARGETS_OF_PAX3_FOXO1_FUSION_DN	40	0.510888	1.92657	0.0019802	0.0140066	0.624	4815	tags=40%, list=16%, signal=48%
YoungHSCe_vs_AgedHSCe	YANG_MUC2_TARGETS_DUODENUM_6MO_DN	15	0.671134	1.92768	0	0.0141678	0.623	2131	tags=33%, list=7%, signal=36%
YoungHSCe_vs_AgedHSCe	CUI_TCF21_TARGETS_UP	29	0.557558	1.9332	0	0.0134524	0.605	889	tags=17%, list=3%, signal=18%
YoungHSCe_vs_AgedHSCe	FISCHER_G1_S_CELL_CYCLE	184	0.381832	1.93341	0	0.0136678	0.605	3618	tags=33%, list=12%, signal=37%
YoungHSCe_vs_AgedHSCe	REACTOME_TRANSCRIPTION	196	0.394209	1.96582	0	0.00956043	0.48	3669	tags=33%, list=12%, signal=37%
YoungHSCe_vs_AgedHSCe	KIM_WT1_TARGETS_DN	425	0.357785	1.97388	0	0.00878356	0.444	3718	tags=31%, list=12%, signal=35%
YoungHSCe_vs_AgedHSCe	WANG_RESPONSE_TO_GSK3_INHIBITOR_SB216763_UP	348	0.366098	1.9817	0	0.00797026	0.398	3667	tags=27%, list=12%, signal=30%
YoungHSCe_vs_AgedHSCe	LIANG_SILENCED_BY_METHYLATION_2	39	0.525578	1.98945	0	0.00744502	0.377	4726	tags=44%, list=16%, signal=52%
YoungHSCe_vs_AgedHSCe	PICCALUGA_ANGIOIMMUNOBLASTIC_LYMPHOMA_UP	182	0.399746	1.99109	0	0.00743296	0.371	4757	tags=34%, list=16%, signal=40%
YoungHSCe_vs_AgedHSCe	CHANG_IMMORTALIZED_BY_HPV31_DN	49	0.512448	2.03497	0	0.00442715	0.229	3411	tags=43%, list=11%, signal=48%
YoungHSCe_vs_AgedHSCe	GARGALOVIC_RESPONSE_TO_OXIDIZED_PHOSPHOLIPIDS_TURQUOISE_DN	51	0.521488	2.03721	0	0.0043849	0.224	3656	tags=35%, list=12%, signal=40%
YoungHSCe_vs_AgedHSCe	WU_HBX_TARGETS_3_UP	18	0.664264	2.04775	0.00206186	0.00389419	0.195	1141	tags=33%, list=4%, signal=35%
YoungHSCe_vs_AgedHSCe	BOWIE_RESPONSE_TO_TAMOXIFEN	18	0.679653	2.04782	0	0.00396071	0.194	3254	tags=44%, list=11%, signal=50%
YoungHSCe_vs_AgedHSCe	REN_BOUND_BY_E2F	61	0.498647	2.05121	0	0.00387047	0.187	3532	tags=39%, list=12%, signal=45%
YoungHSCe_vs_AgedHSCe	DOUGLAS_BMI1_TARGETS_DN	294	0.386492	2.05461	0	0.00377388	0.18	4029	tags=33%, list=14%, signal=38%
YoungHSCe_vs_AgedHSCe	ZHANG_INTERFERON_RESPONSE	23	0.650567	2.07108	0	0.00314909	0.151	3382	tags=52%, list=11%, signal=59%
YoungHSCe_vs_AgedHSCe	SASAKI_ADULT_T_CELL_LEUKEMIA	163	0.427662	2.08725	0	0.00266666	0.127	3525	tags=34%, list=12%, signal=38%
YoungHSCe_vs_AgedHSCe	TAKEDA_TARGETS_OF_NUP98_HOXA9_FUSION_8D_UP	139	0.441331	2.08891	0	0.00271166	0.127	3471	tags=33%, list=12%, signal=37%
YoungHSCe_vs_AgedHSCe	KEGG_FATTY_ACID_METABOLISM	36	0.568638	2.08986	0	0.00277945	0.127	5251	tags=56%, list=18%, signal=67%
YoungHSCe_vs_AgedHSCe	KEGG_PEROXISOME	74	0.491544	2.09009	0	0.00285072	0.127	4060	tags=36%, list=14%, signal=42%
YoungHSCe_vs_AgedHSCe	BOSCO_INTERFERON_INDUCED_ANTIVIRAL_MODULE	71	0.492686	2.09482	0	0.00279728	0.123	3873	tags=39%, list=13%, signal=45%
YoungHSCe_vs_AgedHSCe	MIKKELSEN_NPC_ICP_WITH_H3K4ME3	391	0.386078	2.10328	0	0.00245969	0.106	3810	tags=30%, list=13%, signal=34%
YoungHSCe_vs_AgedHSCe	JAIN_NFKB_SIGNALING	74	0.497011	2.11931	0	0.0018553	0.082	3908	tags=35%, list=13%, signal=40%
YoungHSCe_vs_AgedHSCe	FLOTHO_PEDIATRIC_ALL_THERAPY_RESPONSE_DN	25	0.638308	2.12589	0	0.00172425	0.074	2804	tags=32%, list=9%, signal=35%
YoungHSCe_vs_AgedHSCe	ZWANG_DOWN_BY_2ND_EGF_PULSE	230	0.413261	2.13632	0	0.00158499	0.067	3796	tags=33%, list=13%, signal=38%
YoungHSCe_vs_AgedHSCe	GARGALOVIC_RESPONSE_TO_OXIDIZED_PHOSPHOLIPIDS_BLUE_DN	53	0.539029	2.1478	0	0.0013397	0.055	3292	tags=38%, list=11%, signal=42%
YoungHSCe_vs_AgedHSCe	TAKEDA_TARGETS_OF_NUP98_HOXA9_FUSION_10D_UP	165	0.433895	2.15601	0	0.00125489	0.05	3994	tags=34%, list=13%, signal=39%
YoungHSCe_vs_AgedHSCe	LIM_MAMMARY_STEM_CELL_DN	387	0.402165	2.19124	0	0.000596537	0.023	3799	tags=33%, list=13%, signal=37%
YoungHSCe_vs_AgedHSCe	BOWIE_RESPONSE_TO_EXTRACELLULAR_MATRIX	17	0.728883	2.19575	0	0.000589526	0.022	1982	tags=47%, list=7%, signal=50%
YoungHSCe_vs_AgedHSCe	SEITZ_NEOPLASTIC_TRANSFORMATION_BY_8P_DELETION_UP	62	0.54629	2.2578	0	0.000112569	0.004	3382	tags=45%, list=11%, signal=51%
YoungHSCe_vs_AgedHSCe	BROWNE_INTERFERON_RESPONSIVE_GENES	65	0.543012	2.26932	0	8.78235e-05	0.003	3486	tags=45%, list=12%, signal=50%
YoungHSCe_vs_AgedHSCe	STAMBOLSKY_TARGETS_OF_MUTATED_TP53_DN	40	0.615779	2.27363	0	9.10762e-05	0.003	2531	tags=43%, list=8%, signal=46%
YoungHSCe_vs_AgedHSCe	ROSS_AML_OF_FAB_M7_TYPE	68	0.530949	2.28763	0	6.37283e-05	0.002	3664	tags=43%, list=12%, signal=49%
YoungHSCe_vs_AgedHSCe	ACEVEDO_LIVER_CANCER_WITH_H3K9ME3_DN	103	0.497748	2.29962	0	6.62775e-05	0.002	3903	tags=37%, list=13%, signal=42%
YoungHSCe_vs_AgedHSCe	WIERENGA_STAT5A_TARGETS_DN	197	0.459246	2.30304	0	6.9039e-05	0.002	3288	tags=34%, list=11%, signal=37%
YoungHSCe_vs_AgedHSCe	TENEDINI_MEGAKARYOCYTE_MARKERS	64	0.563121	2.3182	0	7.20407e-05	0.002	2388	tags=42%, list=8%, signal=46%
YoungHSCe_vs_AgedHSCe	ACEVEDO_LIVER_CANCER_WITH_H3K27ME3_DN	155	0.479257	2.33229	0	7.53153e-05	0.002	3907	tags=34%, list=13%, signal=38%
YoungHSCe_vs_AgedHSCe	SANA_RESPONSE_TO_IFNG_UP	71	0.554706	2.33966	0	3.94029e-05	0.001	4765	tags=46%, list=16%, signal=55%
YoungHSCe_vs_AgedHSCe	REACTOME_CHROMOSOME_MAINTENANCE	116	0.507575	2.37666	0	4.1373e-05	0.001	3836	tags=34%, list=13%, signal=39%
YoungHSCe_vs_AgedHSCe	EINAV_INTERFERON_SIGNATURE_IN_CANCER	26	0.730374	2.43305	0	4.35506e-05	0.001	3382	tags=54%, list=11%, signal=61%
YoungHSCe_vs_AgedHSCe	DAUER_STAT3_TARGETS_DN	49	0.626307	2.44194	0	4.597e-05	0.001	3582	tags=49%, list=12%, signal=56%
YoungHSCe_vs_AgedHSCe	SMIRNOV_RESPONSE_TO_IR_2HR_DN	51	0.628744	2.45011	0	4.86741e-05	0.001	2917	tags=47%, list=10%, signal=52%
YoungHSCe_vs_AgedHSCe	TAKEDA_TARGETS_OF_NUP98_HOXA9_FUSION_3D_UP	163	0.516006	2.52507	0	0	0	3382	tags=40%, list=11%, signal=45%
YoungHSCe_vs_AgedHSCe	ZHOU_INFLAMMATORY_RESPONSE_FIMA_DN	242	0.486036	2.52575	0	0	0	3658	tags=38%, list=12%, signal=43%
YoungHSCe_vs_AgedHSCe	REACTOME_MEIOTIC_SYNAPSIS	68	0.605635	2.52995	0	0	0	3836	tags=50%, list=13%, signal=57%
YoungHSCe_vs_AgedHSCe	KEGG_SYSTEMIC_LUPUS_ERYTHEMATOSUS	112	0.56044	2.56022	0	0	0	3276	tags=40%, list=11%, signal=45%
YoungHSCe_vs_AgedHSCe	ZHOU_INFLAMMATORY_RESPONSE_LIVE_DN	331	0.486195	2.60989	0	0	0	3993	tags=38%, list=13%, signal=43%
YoungHSCe_vs_AgedHSCe	HECKER_IFNB1_TARGETS	82	0.598382	2.61383	0	0	0	3382	tags=41%, list=11%, signal=47%
YoungHSCe_vs_AgedHSCe	REACTOME_RNA_POL_I_RNA_POL_III_AND_MITOCHONDRIAL_TRANSCRIPTION	115	0.576187	2.65853	0	0	0	3836	tags=46%, list=13%, signal=53%
YoungHSCe_vs_AgedHSCe	REACTOME_AMYLOIDS	67	0.648372	2.68869	0	0	0	3463	tags=52%, list=12%, signal=59%
YoungHSCe_vs_AgedHSCe	REACTOME_TELOMERE_MAINTENANCE	73	0.64132	2.693	0	0	0	3064	tags=42%, list=10%, signal=47%
YoungHSCe_vs_AgedHSCe	REACTOME_MEIOSIS	105	0.593694	2.70327	0	0	0	3882	tags=48%, list=13%, signal=55%
YoungHSCe_vs_AgedHSCe	REACTOME_DEPOSITION_OF_NEW_CENPA_CONTAINING_NUCLEOSOMES_AT_THE_CENTROMERE	62	0.652213	2.70487	0	0	0	3463	tags=45%, list=12%, signal=51%
YoungHSCe_vs_AgedHSCe	REACTOME_RNA_POL_I_PROMOTER_OPENING	58	0.687322	2.76899	0	0	0	3463	tags=59%, list=12%, signal=66%
YoungHSCe_vs_AgedHSCe	REACTOME_RNA_POL_I_TRANSCRIPTION	83	0.641514	2.79567	0	0	0	3589	tags=53%, list=12%, signal=60%
YoungHSCe_vs_AgedHSCe	REACTOME_PACKAGING_OF_TELOMERE_ENDS	46	0.725951	2.82932	0	0	0	3024	tags=57%, list=10%, signal=63%
YoungHSCe_vs_AgedHSCe	MOSERLE_IFNA_RESPONSE	31	0.798297	2.84019	0	0	0	3382	tags=74%, list=11%, signal=84%
YoungHSCe_vs_AgedHSCe	REACTOME_MEIOTIC_RECOMBINATION	78	0.682501	2.95975	0	0	0	3882	tags=56%, list=13%, signal=65%

## Sheet: Ctrl vs sgKLF6
Compared_Groups	NAME	SIZE	ES	NES	NOM p-val	FDR q-val	FWER p-val	RANK AT MAX	LEADING EDGE
sgCTRL_vs_sgKLF6	NIKOLSKY_BREAST_CANCER_8P12_P11_AMPLICON	52	-0.857074	-2.11381	0	0	0	3593	tags=58%, list=8%, signal=63%
sgCTRL_vs_sgKLF6	NIKOLSKY_BREAST_CANCER_8Q23_Q24_AMPLICON	144	-0.740954	-2.06458	0	0	0	3729	tags=60%, list=9%, signal=66%
sgCTRL_vs_sgKLF6	MULLIGHAN_MLL_SIGNATURE_2_DN	269	-0.692879	-2.05387	0	0	0	3633	tags=43%, list=8%, signal=46%
sgCTRL_vs_sgKLF6	TONKS_TARGETS_OF_RUNX1_RUNX1T1_FUSION_HSC_UP	183	-0.719	-2.05188	0	0	0	3558	tags=51%, list=8%, signal=55%
sgCTRL_vs_sgKLF6	TONKS_TARGETS_OF_RUNX1_RUNX1T1_FUSION_SUSTAINDED_IN_ERYTHROCYTE_UP	44	-0.834233	-1.98334	0	0	0	3458	tags=57%, list=8%, signal=62%
sgCTRL_vs_sgKLF6	ROSS_AML_OF_FAB_M7_TYPE	66	-0.776733	-1.97202	0	0	0	4914	tags=56%, list=11%, signal=63%
sgCTRL_vs_sgKLF6	MULLIGHAN_MLL_SIGNATURE_1_DN	231	-0.677783	-1.96429	0	0	0	4248	tags=44%, list=10%, signal=48%
sgCTRL_vs_sgKLF6	NIKOLSKY_BREAST_CANCER_16Q24_AMPLICON	48	-0.804361	-1.96027	0	0	0	4803	tags=65%, list=11%, signal=73%
sgCTRL_vs_sgKLF6	TONKS_TARGETS_OF_RUNX1_RUNX1T1_FUSION_ERYTHROCYTE_UP	155	-0.690091	-1.91297	0	0.000273512	0.002	3458	tags=45%, list=8%, signal=49%
sgCTRL_vs_sgKLF6	SCHMIDT_POR_TARGETS_IN_LIMB_BUD_UP	25	-0.857713	-1.90381	0	0.000246161	0.002	3274	tags=72%, list=8%, signal=78%
sgCTRL_vs_sgKLF6	TAKEDA_TARGETS_OF_NUP98_HOXA9_FUSION_8D_UP	151	-0.672906	-1.88919	0	0.00100187	0.009	4108	tags=43%, list=10%, signal=47%
sgCTRL_vs_sgKLF6	WIERENGA_STAT5A_TARGETS_GROUP1	129	-0.688577	-1.88912	0	0.000918384	0.009	4031	tags=49%, list=9%, signal=54%
sgCTRL_vs_sgKLF6	HORTON_SREBF_TARGETS	24	-0.888169	-1.86507	0	0.00178719	0.019	1550	tags=67%, list=4%, signal=69%
sgCTRL_vs_sgKLF6	KEGG_BIOSYNTHESIS_OF_UNSATURATED_FATTY_ACIDS	22	-0.878565	-1.86379	0	0.00174679	0.02	3196	tags=55%, list=7%, signal=59%
sgCTRL_vs_sgKLF6	TONKS_TARGETS_OF_RUNX1_RUNX1T1_FUSION_MONOCYTE_UP	199	-0.640482	-1.86348	0	0.00163034	0.02	4944	tags=44%, list=12%, signal=49%
sgCTRL_vs_sgKLF6	WIERENGA_STAT5A_TARGETS_UP	208	-0.644204	-1.86192	0	0.00152844	0.02	4031	tags=45%, list=9%, signal=50%
sgCTRL_vs_sgKLF6	TONKS_TARGETS_OF_RUNX1_RUNX1T1_FUSION_GRANULOCYTE_UP	53	-0.753043	-1.85312	0	0.00208005	0.029	3119	tags=49%, list=7%, signal=53%
sgCTRL_vs_sgKLF6	REACTOME_IL_3_5_AND_GM_CSF_SIGNALING	39	-0.802186	-1.85058	0	0.00216534	0.032	4072	tags=56%, list=10%, signal=62%
sgCTRL_vs_sgKLF6	OUILLETTE_CLL_13Q14_DELETION_DN	57	-0.750188	-1.84581	0	0.00262813	0.041	3550	tags=47%, list=8%, signal=52%
sgCTRL_vs_sgKLF6	REACTOME_SIGNALING_BY_FGFR1_MUTANTS	27	-0.830188	-1.84251	0	0.00273865	0.045	2486	tags=48%, list=6%, signal=51%
sgCTRL_vs_sgKLF6	REACTOME_CHOLESTEROL_BIOSYNTHESIS	21	-0.875884	-1.84058	0	0.00289891	0.05	3277	tags=71%, list=8%, signal=77%
sgCTRL_vs_sgKLF6	BIOCARTA_EGF_PATHWAY	31	-0.807965	-1.83045	0	0.00375968	0.068	4005	tags=61%, list=9%, signal=68%
sgCTRL_vs_sgKLF6	SESTO_RESPONSE_TO_UV_C8	72	-0.709639	-1.8293	0	0.00370143	0.069	4447	tags=50%, list=10%, signal=56%
sgCTRL_vs_sgKLF6	HAMAI_APOPTOSIS_VIA_TRAIL_DN	173	-0.645458	-1.81797	0	0.00516456	0.099	5528	tags=45%, list=13%, signal=51%
sgCTRL_vs_sgKLF6	REACTOME_SIGNALING_BY_FGFR_MUTANTS	39	-0.783614	-1.8155	0	0.00539586	0.108	2486	tags=38%, list=6%, signal=41%
sgCTRL_vs_sgKLF6	YAO_TEMPORAL_RESPONSE_TO_PROGESTERONE_CLUSTER_16	74	-0.710233	-1.81117	0	0.00570391	0.119	4169	tags=42%, list=10%, signal=46%
sgCTRL_vs_sgKLF6	PID_GMCSF_PATHWAY	35	-0.793236	-1.8079	0.00170358	0.0059443	0.128	2597	tags=49%, list=6%, signal=52%
sgCTRL_vs_sgKLF6	BURTON_ADIPOGENESIS_PEAK_AT_0HR	61	-0.7204	-1.80725	0	0.00586283	0.131	4825	tags=46%, list=11%, signal=52%
sgCTRL_vs_sgKLF6	PROVENZANI_METASTASIS_DN	134	-0.648978	-1.80474	0	0.0062041	0.143	4991	tags=47%, list=12%, signal=53%
sgCTRL_vs_sgKLF6	PID_IL3_PATHWAY	26	-0.836758	-1.79453	0	0.0082343	0.191	2597	tags=50%, list=6%, signal=53%
sgCTRL_vs_sgKLF6	BIOCARTA_BIOPEPTIDES_PATHWAY	43	-0.752409	-1.79371	0	0.00816267	0.195	4005	tags=44%, list=9%, signal=49%
sgCTRL_vs_sgKLF6	XU_HGF_SIGNALING_NOT_VIA_AKT1_6HR	26	-0.817946	-1.78632	0	0.00972769	0.237	4869	tags=62%, list=11%, signal=69%
sgCTRL_vs_sgKLF6	JOHNSTONE_PARVB_TARGETS_2_UP	133	-0.637614	-1.78187	0	0.0107595	0.265	4238	tags=52%, list=10%, signal=57%
sgCTRL_vs_sgKLF6	VERHAAK_AML_WITH_NPM1_MUTATED_DN	241	-0.607412	-1.77443	0	0.0125851	0.308	2397	tags=37%, list=6%, signal=39%
sgCTRL_vs_sgKLF6	NIKOLSKY_BREAST_CANCER_8Q12_Q22_AMPLICON	127	-0.65299	-1.77333	0	0.0123994	0.313	5172	tags=45%, list=12%, signal=51%
sgCTRL_vs_sgKLF6	LENAOUR_DENDRITIC_CELL_MATURATION_UP	112	-0.651098	-1.77057	0	0.0128692	0.33	4566	tags=43%, list=11%, signal=48%
sgCTRL_vs_sgKLF6	NIKOLSKY_BREAST_CANCER_17Q21_Q25_AMPLICON	318	-0.593109	-1.76977	0	0.0126848	0.334	5606	tags=45%, list=13%, signal=52%
sgCTRL_vs_sgKLF6	REACTOME_SIGNALING_BY_FGFR1_FUSION_MUTANTS	18	-0.867875	-1.76659	0	0.0134082	0.354	2446	tags=61%, list=6%, signal=65%
sgCTRL_vs_sgKLF6	REACTOME_IL_2_SIGNALING	37	-0.772839	-1.76605	0	0.0132825	0.358	4618	tags=54%, list=11%, signal=61%
sgCTRL_vs_sgKLF6	BIOCARTA_TPO_PATHWAY	24	-0.830534	-1.76604	0.00176056	0.0129504	0.358	3680	tags=58%, list=9%, signal=64%
sgCTRL_vs_sgKLF6	LIU_PROSTATE_CANCER_DN	465	-0.569177	-1.75423	0	0.0172035	0.451	3760	tags=31%, list=9%, signal=34%
sgCTRL_vs_sgKLF6	CHANG_CORE_SERUM_RESPONSE_DN	198	-0.610251	-1.74987	0	0.0190237	0.495	3535	tags=39%, list=8%, signal=43%
sgCTRL_vs_sgKLF6	HANN_RESISTANCE_TO_BCL2_INHIBITOR_UP	34	-0.771329	-1.74887	0	0.018893	0.501	3763	tags=32%, list=9%, signal=35%
sgCTRL_vs_sgKLF6	NIKOLSKY_BREAST_CANCER_5P15_AMPLICON	26	-0.804596	-1.74679	0	0.019209	0.517	3281	tags=50%, list=8%, signal=54%
sgCTRL_vs_sgKLF6	WENG_POR_TARGETS_GLOBAL_UP	19	-0.879169	-1.74576	0	0.019134	0.526	2045	tags=53%, list=5%, signal=55%
sgCTRL_vs_sgKLF6	DUNNE_TARGETS_OF_AML1_MTG8_FUSION_DN	19	-0.867288	-1.74384	0	0.0194843	0.543	3119	tags=63%, list=7%, signal=68%
sgCTRL_vs_sgKLF6	REACTOME_SIGNALING_BY_SCF_KIT	75	-0.677701	-1.74352	0	0.0191211	0.544	2668	tags=37%, list=6%, signal=40%
sgCTRL_vs_sgKLF6	TONKS_TARGETS_OF_RUNX1_RUNX1T1_FUSION_SUSTAINED_IN_GRANULOCYTE_UP	15	-0.883742	-1.73996	0	0.0205466	0.574	2655	tags=73%, list=6%, signal=78%
sgCTRL_vs_sgKLF6	BIOCARTA_PDGF_PATHWAY	32	-0.781171	-1.73977	0	0.0202265	0.577	4005	tags=59%, list=9%, signal=65%
sgCTRL_vs_sgKLF6	MEISSNER_BRAIN_HCP_WITH_H3K4ME2_AND_H3K27ME3	57	-0.699489	-1.73948	0	0.0198712	0.578	6032	tags=42%, list=14%, signal=49%
sgCTRL_vs_sgKLF6	LIM_MAMMARY_STEM_CELL_UP	463	-0.5645	-1.73751	0	0.0204337	0.591	5386	tags=39%, list=13%, signal=44%
sgCTRL_vs_sgKLF6	JOHANSSON_BRAIN_CANCER_EARLY_VS_LATE_DN	45	-0.731022	-1.7315	0	0.0230846	0.64	3196	tags=33%, list=7%, signal=36%
sgCTRL_vs_sgKLF6	LI_INDUCED_T_TO_NATURAL_KILLER_UP	301	-0.574439	-1.72905	0	0.0241393	0.66	3197	tags=38%, list=7%, signal=40%
sgCTRL_vs_sgKLF6	REACTOME_IL_RECEPTOR_SHC_SIGNALING	23	-0.814408	-1.72883	0	0.0237823	0.661	4541	tags=65%, list=11%, signal=73%
sgCTRL_vs_sgKLF6	ACOSTA_PROLIFERATION_INDEPENDENT_MYC_TARGETS_DN	111	-0.636397	-1.71892	0	0.0280164	0.726	4333	tags=41%, list=10%, signal=46%
sgCTRL_vs_sgKLF6	CERVERA_SDHB_TARGETS_1_UP	109	-0.637004	-1.71891	0	0.0275161	0.726	4132	tags=32%, list=10%, signal=35%
sgCTRL_vs_sgKLF6	BIOCARTA_IL2_PATHWAY	21	-0.828956	-1.71854	0	0.0272051	0.727	4618	tags=62%, list=11%, signal=69%
sgCTRL_vs_sgKLF6	TAVOR_CEBPA_TARGETS_DN	30	-0.76777	-1.71507	0	0.0288935	0.758	2858	tags=43%, list=7%, signal=46%
sgCTRL_vs_sgKLF6	MULLIGHAN_NPM1_SIGNATURE_3_DN	158	-0.605731	-1.71499	0	0.028424	0.759	5593	tags=49%, list=13%, signal=56%
sgCTRL_vs_sgKLF6	DAVICIONI_MOLECULAR_ARMS_VS_ERMS_DN	173	-0.608022	-1.71337	0	0.0290665	0.773	3845	tags=39%, list=9%, signal=42%
sgCTRL_vs_sgKLF6	KAN_RESPONSE_TO_ARSENIC_TRIOXIDE	119	-0.631874	-1.71012	0	0.0305035	0.79	4179	tags=39%, list=10%, signal=44%
sgCTRL_vs_sgKLF6	JAATINEN_HEMATOPOIETIC_STEM_CELL_UP	304	-0.573658	-1.70854	0	0.0312035	0.8	3942	tags=40%, list=9%, signal=44%
sgCTRL_vs_sgKLF6	DAVICIONI_TARGETS_OF_PAX_FOXO1_FUSIONS_UP	243	-0.580028	-1.70757	0	0.0315956	0.81	5318	tags=45%, list=12%, signal=51%
sgCTRL_vs_sgKLF6	SARRIO_EPITHELIAL_MESENCHYMAL_TRANSITION_DN	145	-0.608385	-1.70691	0	0.0315967	0.816	2409	tags=34%, list=6%, signal=36%
sgCTRL_vs_sgKLF6	VALK_AML_CLUSTER_11	36	-0.750661	-1.70689	0	0.0311294	0.816	2309	tags=61%, list=5%, signal=65%
sgCTRL_vs_sgKLF6	SEMENZA_HIF1_TARGETS	34	-0.743181	-1.70493	0.00186567	0.0318937	0.828	4000	tags=41%, list=9%, signal=45%
sgCTRL_vs_sgKLF6	GROSS_HYPOXIA_VIA_ELK3_ONLY_DN	40	-0.723454	-1.70484	0	0.0315448	0.829	3923	tags=50%, list=9%, signal=55%
sgCTRL_vs_sgKLF6	CLASPER_LYMPHATIC_VESSELS_DURING_METASTASIS_DN	35	-0.755687	-1.70095	0	0.0337474	0.853	4440	tags=46%, list=10%, signal=51%
sgCTRL_vs_sgKLF6	MCBRYAN_PUBERTAL_TGFB1_TARGETS_UP	168	-0.60702	-1.69945	0	0.0343162	0.859	4341	tags=39%, list=10%, signal=43%
sgCTRL_vs_sgKLF6	KEGG_ETHER_LIPID_METABOLISM	32	-0.748904	-1.69824	0.00164204	0.034765	0.868	2128	tags=31%, list=5%, signal=33%
sgCTRL_vs_sgKLF6	RODWELL_AGING_KIDNEY_NO_BLOOD_UP	210	-0.586642	-1.69428	0	0.037202	0.896	4248	tags=33%, list=10%, signal=36%
sgCTRL_vs_sgKLF6	ZHU_SKIL_TARGETS_UP	20	-0.81156	-1.69276	0.00544465	0.037802	0.9	1896	tags=45%, list=4%, signal=47%
sgCTRL_vs_sgKLF6	REACTOME_PHOSPHORYLATION_OF_CD3_AND_TCR_ZETA_CHAINS	15	-0.864533	-1.69231	0.00187617	0.0376678	0.9	3068	tags=53%, list=7%, signal=57%
sgCTRL_vs_sgKLF6	REACTOME_METABOLISM_OF_LIPIDS_AND_LIPOPROTEINS	464	-0.550992	-1.69014	0	0.0389015	0.908	4839	tags=33%, list=11%, signal=37%
sgCTRL_vs_sgKLF6	BIOCARTA_AT1R_PATHWAY	34	-0.741342	-1.68869	0.00524476	0.0396174	0.913	6042	tags=59%, list=14%, signal=68%
sgCTRL_vs_sgKLF6	BERENJENO_TRANSFORMED_BY_RHOA_DN	380	-0.554942	-1.6861	0	0.0413548	0.926	4669	tags=39%, list=11%, signal=44%
sgCTRL_vs_sgKLF6	KEGG_GLYCOSAMINOGLYCAN_DEGRADATION	21	-0.803126	-1.68369	0.00524476	0.042828	0.935	4392	tags=52%, list=10%, signal=58%
sgCTRL_vs_sgKLF6	LOCKWOOD_AMPLIFIED_IN_LUNG_CANCER	210	-0.584905	-1.68232	0	0.0430116	0.94	4127	tags=42%, list=10%, signal=46%
sgCTRL_vs_sgKLF6	CAIRO_LIVER_DEVELOPMENT_UP	160	-0.592085	-1.68132	0	0.043404	0.945	4558	tags=31%, list=11%, signal=35%
sgCTRL_vs_sgKLF6	CHARAFE_BREAST_CANCER_LUMINAL_VS_MESENCHYMAL_DN	448	-0.547914	-1.681	0	0.043059	0.946	4248	tags=39%, list=10%, signal=43%
sgCTRL_vs_sgKLF6	VALK_AML_WITH_FLT3_ITD	38	-0.718855	-1.68012	0.00173611	0.043353	0.95	4007	tags=45%, list=9%, signal=49%
sgCTRL_vs_sgKLF6	LIEN_BREAST_CARCINOMA_METAPLASTIC_VS_DUCTAL_UP	78	-0.651583	-1.67866	0	0.0438809	0.954	2728	tags=37%, list=6%, signal=40%
sgCTRL_vs_sgKLF6	LE_EGR2_TARGETS_DN	105	-0.624077	-1.67854	0	0.0434401	0.954	3274	tags=36%, list=8%, signal=39%
sgCTRL_vs_sgKLF6	MIKKELSEN_ES_ICP_WITH_H3K4ME3_AND_H3K27ME3	133	-0.617637	-1.67635	0	0.0448164	0.958	6318	tags=29%, list=15%, signal=34%
sgCTRL_vs_sgKLF6	TAKEDA_TARGETS_OF_NUP98_HOXA9_FUSION_3D_UP	173	-0.594343	-1.67613	0	0.0444619	0.958	4124	tags=40%, list=10%, signal=45%
sgCTRL_vs_sgKLF6	REACTOME_PROTEIN_FOLDING	51	-0.687442	-1.67515	0.00337838	0.0447224	0.965	5928	tags=45%, list=14%, signal=52%
sgCTRL_vs_sgKLF6	HOEBEKE_LYMPHOID_STEM_CELL_DN	84	-0.638583	-1.67356	0.0015528	0.0453962	0.966	2411	tags=40%, list=6%, signal=43%
sgCTRL_vs_sgKLF6	SMIRNOV_CIRCULATING_ENDOTHELIOCYTES_IN_CANCER_UP	154	-0.598983	-1.67206	0	0.0461534	0.969	3561	tags=42%, list=8%, signal=46%
sgCTRL_vs_sgKLF6	CROMER_TUMORIGENESIS_UP	61	-0.665944	-1.67042	0.00161551	0.0470131	0.972	3757	tags=30%, list=9%, signal=32%
sgCTRL_vs_sgKLF6	TONKS_TARGETS_OF_RUNX1_RUNX1T1_FUSION_SUSTAINED_IN_MONOCYTE_UP	21	-0.791221	-1.66969	0.00176367	0.0470993	0.972	3431	tags=57%, list=8%, signal=62%
sgCTRL_vs_sgKLF6	FRASOR_RESPONSE_TO_ESTRADIOL_DN	78	-0.648686	-1.66905	0	0.0471279	0.974	5550	tags=47%, list=13%, signal=54%
sgCTRL_vs_sgKLF6	KUNINGER_IGF1_VS_PDGFB_TARGETS_DN	43	-0.699511	-1.66792	0.00336134	0.0477792	0.977	3334	tags=37%, list=8%, signal=40%
sgCTRL_vs_sgKLF6	QI_HYPOXIA	138	-0.604588	-1.66565	0	0.0492779	0.98	3829	tags=46%, list=9%, signal=50%
sgCTRL_vs_sgKLF6	HELLER_HDAC_TARGETS_SILENCED_BY_METHYLATION_UP	429	-0.541326	-1.66563	0	0.0487537	0.98	4459	tags=33%, list=10%, signal=37%
sgCTRL_vs_sgKLF6	GAUSSMANN_MLL_AF4_FUSION_TARGETS_F_UP	183	-0.585387	-1.66527	0	0.0485729	0.981	4038	tags=32%, list=9%, signal=35%
sgCTRL_vs_sgKLF6	KEGG_GLYCOSPHINGOLIPID_BIOSYNTHESIS_GANGLIO_SERIES	15	-0.841965	-1.66489	0.00176056	0.0483832	0.982	2793	tags=53%, list=7%, signal=57%
sgCTRL_vs_sgKLF6	BILANGES_SERUM_AND_RAPAMYCIN_SENSITIVE_GENES	68	0.639196	1.75532	0.00257732	0.0385153	0.668	4512	tags=54%, list=11%, signal=61%
sgCTRL_vs_sgKLF6	NIKOLSKY_BREAST_CANCER_17Q11_Q21_AMPLICON	122	0.612509	1.77349	0	0.0294692	0.544	4241	tags=34%, list=10%, signal=37%
sgCTRL_vs_sgKLF6	REACTOME_INFLUENZA_LIFE_CYCLE	152	0.581899	1.77424	0	0.0305427	0.532	5051	tags=43%, list=12%, signal=48%
sgCTRL_vs_sgKLF6	REACTOME_DNA_STRAND_ELONGATION	30	0.769702	1.80653	0	0.0157122	0.314	4581	tags=67%, list=11%, signal=75%
sgCTRL_vs_sgKLF6	REACTOME_SRP_DEPENDENT_COTRANSLATIONAL_PROTEIN_TARGETING_TO_MEMBRANE	126	0.612997	1.82131	0	0.0116006	0.229	5662	tags=47%, list=13%, signal=54%
sgCTRL_vs_sgKLF6	KEGG_DNA_REPLICATION	36	0.752734	1.8299	0	0.0101624	0.194	4581	tags=61%, list=11%, signal=68%
sgCTRL_vs_sgKLF6	IRITANI_MAD1_TARGETS_DN	46	0.721365	1.83473	0	0.00942614	0.173	4617	tags=57%, list=11%, signal=63%
sgCTRL_vs_sgKLF6	REACTOME_3_UTR_MEDIATED_TRANSLATIONAL_REGULATION	123	0.635655	1.83962	0	0.00926493	0.161	4656	tags=42%, list=11%, signal=47%
sgCTRL_vs_sgKLF6	REACTOME_INFLUENZA_VIRAL_RNA_TRANSCRIPTION_AND_REPLICATION	118	0.624777	1.85496	0	0.0075268	0.122	5051	tags=42%, list=12%, signal=47%
sgCTRL_vs_sgKLF6	REACTOME_ACTIVATION_OF_THE_PRE_REPLICATIVE_COMPLEX	30	0.768539	1.8616	0	0.00682113	0.101	4597	tags=73%, list=11%, signal=82%
sgCTRL_vs_sgKLF6	NIKOLSKY_BREAST_CANCER_16P13_AMPLICON	111	0.639492	1.86749	0	0.00684454	0.091	5730	tags=46%, list=13%, signal=53%
sgCTRL_vs_sgKLF6	KEGG_RIBOSOME	88	0.6645	1.87671	0	0.0064656	0.077	4656	tags=51%, list=11%, signal=57%
sgCTRL_vs_sgKLF6	NIKOLSKY_BREAST_CANCER_19Q13.1_AMPLICON	22	0.853585	1.8816	0	0.00644336	0.067	4546	tags=77%, list=11%, signal=86%
sgCTRL_vs_sgKLF6	TONKS_TARGETS_OF_RUNX1_RUNX1T1_FUSION_HSC_DN	180	0.623599	1.9129	0	0.00286898	0.026	2127	tags=44%, list=5%, signal=46%
sgCTRL_vs_sgKLF6	MULLIGHAN_MLL_SIGNATURE_2_UP	400	0.577853	1.92746	0	0.00213018	0.016	4421	tags=45%, list=10%, signal=49%
sgCTRL_vs_sgKLF6	REACTOME_PEPTIDE_CHAIN_ELONGATION	102	0.672232	1.94844	0	0.000497189	0.003	5051	tags=47%, list=12%, signal=53%
sgCTRL_vs_sgKLF6	ZHONG_RESPONSE_TO_AZACITIDINE_AND_TSA_DN	66	0.733651	1.97733	0	0.00044445	0.002	5002	tags=56%, list=12%, signal=63%
sgCTRL_vs_sgKLF6	MULLIGHAN_MLL_SIGNATURE_1_UP	363	0.601277	2.00038	0	0.000339636	0.001	4013	tags=43%, list=9%, signal=47%
sgCTRL_vs_sgKLF6	DUNNE_TARGETS_OF_AML1_MTG8_FUSION_UP	50	0.799095	2.05301	0	0	0	1593	tags=60%, list=4%, signal=62%
