# Supplementary material for: Aging Human Hematopoietic Stem Cells Manifest Profound Epigenetic Reprogramming of Enhancers That May Predispose to Leukemia
Source: Oxford University Press journal article supplement (doi:10.1158/2159-8290.cd-18-1474), 2019-05-13
Supplement: 21598290cd181474-sup-213895_2_supp_5514134_prymy4.xlsx [file 21598290cd181474-sup-213895_2_supp_5514134_prymy4.xlsx]

## Sheet: Primers, Adapters, shRNA
Oligionucleotide	Sequence	Source	Cat#
H3K4me1 positive target F primer	GAGAGTCCTGGTCTTTGTCA	IDT	NA
H3K4me1 positive target R primer	ACAGTGCCTAGGAAGGGTAT	IDT	NA
H3K4me3 positive target F primer	AGGGAGGGAATTAATCTGAG	IDT	NA
H3K4me3 positive target R primer	ACAGTGCCTAGGAAGGGTAT	IDT	NA
H3K27me3 positive target F primer	TACTTGGTTTCTGCATCCTT	IDT	NA
H3K27me3 positive target R primer	TCACTAAAGAAACCGTTCGT	IDT	NA
H3K27ac positive target F primer	GAGCAGAGGTGGGAGTTAG	IDT	NA
H3K27ac positive target R primer	TCAGACCCTTTCCTCACC	IDT	NA
Methylated standard adapter for ERRBS, top	AcAcTcTTTcccTAcAcGAcGcTcTTccGATcXT (x= phosphorothiate linkage)	Illumina	1005560
Methylated standard adapter for ERRBS, bottom	pGATcGGAAGAGcTcGTATGccGTcTTcTGcTTG (p=phosphate; c= methylated)	Illumina	1005560
PCR primer 1.0 for ERRBS	ATGATACGGCGACCACCGAGATCTACACTCTTTCCCTACACGACGCTCTTCCGATCxT (x= phosphorothiate linkage)	IDT	NA
PCR primer 2.0 for ERRBS	CAAGCAGAAGACGGCATACGAGATCGGTCTCGGCATTCCTGCTGAACCGCTCTTCCGATCxT (x= phosphorothiate linkage)	IDT	NA
shLMNA	5’- GATGATCCCTTGCTGACTTAC-3’	Sigma	NA

## Sheet: sgRNA
sgRNA	Sequence
KLF6 E1.1	TGGCAGCGGAGCTTTGAATA
KLF6 E1.2	CTGGCAGCGGAGCTTTGAAT
KLF6 E2.3	GTGCACCGGTGCCACTTTAA
KLF6 E2.2	GCAGGGAACCTTCTCAACTG
NTsgRNA	GTATTACTGATATTGGTGGG
